# Supplementary material for: Metagenomic Insights Into Ecological and Phylogenetic Significances of Candidatus Natranaeroarchaeales, a Novel Abundant Archaeal Order in Soda Lake Sediment
Source: Research Square preprint supplement (doi:10.21203/rs.3.rs-261970/v1), 2021-03-03
Supplement: Supplementary file 1 [file 8ccbdc503836df7b89a6f7a0.xlsx]

## Sheet: Table S1
Table S1 General information of 16S rRNA gene amplicon sequencing
Four samples for each sediment	Sample name in NCBI	Raw reads number	Clean reads number	Feature count
DK1Sed7-1	DK1SA1	170000	137327	131986
DK1Sed7-2	DK1SA2	175000	142012	138273
DK1Sed7-3	DK1SA3	187000	153776	150040
DK1Sed7-4	DK1SA4	173000	142418	136158
DK3Sed8-1	DK3SA1	179000	148141	145137
DK3Sed8-2	DK3SA2	178000	144023	139025
DK3Sed8-3	DK3SA3	182000	150280	147087
DK3Sed8-4	DK3SA4	179000	143271	136182
DK15Sed18-1	DK15SA1	181000	154752	151064
DK15Sed18-2	DK15SA2	175000	147567	137356
DK15Sed18-3	DK15SA3	169000	145605	140158
DK15Sed18-4	DK15SA4	186000	157829	149816
DK24Sed24-1	DK24SA1	178000	149501	145003
DK24Sed24-2	DK24SA2	176000	151055	144941
DK24Sed24-3	DK24SA3	181000	151227	141929
DK24Sed24-4	DK24SA4	182000	155672	147784
DK33Sed33-1	DKSSA1	176000	150746	140298
DK33Sed33-2	DKSSA2	179000	148637	133428
DK33Sed33-3	DKSSA3	178000	151099	140890
DK33Sed33-4	DKSSA4	182000	152251	133657

## Sheet: Table S2
Table S2 Taxonomic assignment and feature count of the Operational Taxonomic Unit (OTU) based on 16S rRNA gene amplicon
OTU ID in sequence progress	OTU ID for short	Classification	Feature counts
			DK1Sed7-1	DK1Sed7-2	DK1Sed7-3	DK1Sed7-4	DK3Sed8-1	DK3Sed8-2	DK3Sed8-3	DK3Sed8-4	DK15Sed18-1	DK15Sed18-2	DK15Sed18-3	DK15Sed18-4	DK24Sed24-1	DK24Sed24-2	DK24Sed24-3	DK24Sed24-4	DK33Sed33-1	DK33Sed33-2	DK33Sed33-3	DK33Sed33-4
0008ad15acee0e6e7a31a5f735042cfb	otu1	D_0__Bacteria	0	0	0	0	0	0	0	0	0	0	0	0	0	6	0	0	0	0	0	0
0019f31d3d582a6dde2392b71d434cfb	otu2	D_0__Bacteria	0	0	0	0	0	0	0	0	0	0	0	0	0	3	0	0	0	0	0	0
003405733c7cd2d81a1e815dafe60b2d	otu4	D_0__Bacteria	0	0	2	0	0	0	0	0	0	0	0	0	0	0	0	0	0	0	0	0
003416e16cbed69f509f2ed5107ea8ec	otu5	D_0__Archaea;D_1__Euryarchaeota;D_2__Halobacteria;D_3__Halobacteriales;D_4__Haloferacaceae;D_5__Halorubrum;	20	12	14	13	8	99	25	7	0	0	2	13	0	5	2	0	26	0	8	6
00347ec2a04ae5606a9229f956edbcf8	otu6	D_0__Bacteria;D_1__Planctomycetes;D_2__Planctomycetacia;D_3__Isosphaerales;D_4__Isosphaeraceae;D_5__uncultured;D_6__uncultured bacterium	0	0	0	0	0	0	0	0	0	0	0	0	0	19	0	0	0	0	0	0
003f4e92e6f4f250fbf416377e0caa9f	otu7	D_0__Bacteria;D_1__Gemmatimonadetes;D_2__BD2-11 terrestrial group;D_3__uncultured forest soil bacterium;D_4__uncultured forest soil bacterium;D_5__uncultured forest soil bacterium;D_6__uncultured forest soil bacterium	0	0	0	0	0	0	0	0	0	0	0	0	0	0	0	8	0	0	0	0
00465f1371f0a71d2be587a1a7d62473	otu8	D_0__Archaea;D_1__Euryarchaeota;D_2__Halobacteria;D_3__Halobacteriales	0	0	0	0	0	0	0	0	0	0	0	0	0	0	0	0	0	0	6	0
004901bf92453275eb2eb7cd7015c0aa	otu9	D_0__Bacteria	0	0	0	0	0	0	0	0	0	0	0	0	0	4	0	0	0	0	0	0
004a3f00e0e9767682ad9b483f1cdf16	otu10	D_0__Bacteria;D_1__Bacteroidetes;D_2__Bacteroidia;D_3__Cytophagales;D_4__Cytophagaceae;D_5__Sporocytophaga;D_6__uncultured bacterium	0	0	0	0	0	0	0	0	0	0	10	0	0	0	0	0	0	0	0	0
004ea4d95e2be946ec2a40e1087c7daa	otu11	D_0__Bacteria	0	0	0	0	0	0	4	0	0	0	0	0	0	0	0	0	0	0	0	0
0052fbc9995b9ce89999170ba96e0638	otu12	D_0__Bacteria	0	0	0	0	0	0	0	0	0	0	0	0	0	0	0	0	0	9	0	0
00550192aaa90c78a6457afc99e68945	otu13	D_0__Archaea;D_1__Euryarchaeota;D_2__Halobacteria;D_3__Halobacteriales;D_4__Haloferacaceae;D_5__Salinarchaeum;D_6__uncultured haloarchaeon	0	0	0	0	0	0	0	0	0	0	0	0	0	0	8	0	0	0	0	0
0056be7df82d38e1c22f0a829b2af62e	otu14	D_0__Bacteria;D_1__Omnitrophicaeota;D_2__uncultured Omnitrophica bacterium;D_3__uncultured Omnitrophica bacterium;D_4__uncultured Omnitrophica bacterium;D_5__uncultured Omnitrophica bacterium;D_6__uncultured Omnitrophica bacterium	70	58	47	64	0	0	0	0	0	0	0	0	0	0	0	0	0	0	0	0
0058db30cbefc9827084971bf68aa040	otu15	D_0__Archaea;D_1__Nanoarchaeaeota;D_2__Woesearchaeia	0	0	0	0	0	4	0	12	16	14	0	108	0	0	0	0	0	0	0	0
005a83665a9f0b7316c1de40e83cc55b	otu16	D_0__Archaea;D_1__Thaumarchaeota;D_2__Nitrososphaeria;D_3__Nitrosopumilales;D_4__Nitrosopumilaceae;D_5__Candidatus Nitrosopumilus;D_6__uncultured archaeon	0	0	0	21	0	60	14	0	0	0	15	0	26	0	0	10	0	0	0	0
005b24fd58e63a8c746547ae836d3c1d	otu17	D_0__Bacteria	20	25	9	69	14	34	29	18	0	0	0	0	0	0	1	22	0	0	0	0
0061a16954a73470e1b6ed095613a85d	otu18	D_0__Bacteria;D_1__Kiritimatiellaeota;D_2__Kiritimatiellae;D_3__WCHB1-41;D_4__uncultured bacterium;D_5__uncultured bacterium;D_6__uncultured bacterium	0	27	35	51	0	0	0	0	0	0	0	0	0	0	0	0	0	0	0	0
006d83f7b3c004e822465b762c1698c1	otu19	D_0__Bacteria;D_1__Patescibacteria;D_2__Parcubacteria	30	50	51	7	0	24	0	17	315	182	170	181	341	609	332	0	26	0	0	0
007554f1f71b59259977c7c5fe5aa15a	otu20	D_0__Archaea;D_1__Nanoarchaeaeota;D_2__Woesearchaeia	77	238	97	625	525	100	215	138	352	35	110	341	26	0	0	2129	0	0	0	0
007edc07689aa7a43d6755e7ce5a2eb1	otu21	D_0__Bacteria	0	0	0	0	3	0	0	0	0	0	0	0	0	0	0	0	0	0	0	0
007f780588ce2cd0c9a8d40e9e7349de	otu22	D_0__Bacteria	0	0	2	0	0	0	0	0	0	0	0	0	0	0	0	0	0	0	0	0
008ff212012f9b984224d4840a3c428a	otu23	D_0__Archaea;D_1__Euryarchaeota;D_2__Halobacteria;D_3__Halobacteriales;D_4__uncultured;D_5__uncultured haloarchaeon;D_6__uncultured haloarchaeon	0	0	0	0	0	0	9	0	0	0	0	0	0	0	0	0	0	0	0	0
00901c476416f05de6ab02d86e8ff131	otu24	D_0__Bacteria	0	8	0	0	0	0	0	0	0	0	0	0	0	0	0	0	0	0	0	0
009f40274792c17a324f5c1e7154bbf2	otu25	D_0__Bacteria	0	0	0	0	0	0	0	21	0	0	0	0	0	0	0	0	0	0	0	0
00a314862fb5e76cf8c9927ed9fde737	otu26	D_0__Bacteria;D_1__BRC1;D_2__metagenome;D_3__metagenome;D_4__metagenome;D_5__metagenome;D_6__metagenome	0	7	0	0	21	0	7	0	0	0	0	0	0	0	0	0	0	0	0	0
00a447656fe4ac4365d1d34dc67844ec	otu27	D_0__Bacteria	0	0	0	0	0	0	0	0	0	0	0	0	0	0	0	12	0	0	0	0
00a842409a6f464fd64e28fbd8ee5148	otu28	D_0__Archaea;D_1__Euryarchaeota;D_2__Halobacteria;D_3__Halobacteriales;D_4__Haloferacaceae;D_5__Haloterrigena;D_6__Haloterrigena sp. FIC148_1	0	0	0	0	0	0	0	0	0	0	0	0	0	0	0	15	0	0	0	0
00a8739a565f7474e2cd8ebd94d8f378	otu29	D_0__Bacteria	8	0	0	0	0	0	0	0	0	0	0	0	0	0	0	0	0	0	0	0
00af4fd279114b8f96dcca0c9c3d58b7	otu30	D_0__Bacteria;D_1__TA6	0	8	0	12	0	0	0	0	0	0	0	0	0	0	0	0	0	0	0	0
00b6812afacadff5ebad6c47c279974e	otu31	D_0__Bacteria;D_1__Patescibacteria;D_2__Parcubacteria;D_3__Candidatus Kaiserbacteria;D_4__uncultured prokaryote;D_5__uncultured prokaryote;D_6__uncultured prokaryote	0	0	0	0	37	0	0	0	0	0	0	0	0	0	0	0	0	0	0	0
00be21db2c6e9a588839e6aa219495cd	otu32	D_0__Archaea;D_1__Nanoarchaeaeota;D_2__Woesearchaeia	0	0	0	0	0	0	0	1	0	12	6	0	0	2	0	0	0	0	0	0
00c9817760da361dfb831cbaf360fc70	otu33	D_0__Bacteria;D_1__Planctomycetes;D_2__Planctomycetacia;D_3__Isosphaerales;D_4__Isosphaeraceae;D_5__uncultured;D_6__uncultured Isosphaera sp.	0	0	0	0	0	0	0	0	0	0	4	0	0	0	0	0	0	0	0	0
00ddeb5e8914b400dc36ec403d99bf64	otu34	D_0__Bacteria;D_1__Halanaerobiaeota;D_2__Halanaerobiia;D_3__Halanaerobiales;D_4__Halanaerobiaceae;D_5__Halarsenatibacter;D_6__uncultured Bacteroidetes bacterium	0	0	0	0	0	0	0	0	0	0	3	0	0	0	0	0	0	0	0	0
00eb86993020027634f9f8436ae49bc4	otu35	D_0__Bacteria;D_1__Kiritimatiellaeota;D_2__Kiritimatiellae;D_3__WCHB1-41;D_4__uncultured Verrucomicrobia bacterium;D_5__uncultured Verrucomicrobia bacterium;D_6__uncultured Verrucomicrobia bacterium	2	0	15	0	0	6	0	34	0	0	0	10	0	0	72	0	0	0	0	0
01015f8fadab00435226500facdd0cf5	otu36	D_0__Bacteria;D_1__Firmicutes;D_2__Clostridia	0	0	0	0	0	0	0	4	0	0	0	0	0	0	0	0	0	0	0	0
01048a9d956475f6feeaae34b575835a	otu37	D_0__Bacteria;D_1__Firmicutes;D_2__Clostridia;D_3__Clostridiales;D_4__Syntrophomonadaceae;D_5__uncultured;D_6__uncultured low G+C Gram-positive bacterium	0	0	0	0	0	0	0	0	0	0	0	0	0	0	0	32	0	0	0	0
01072e1a5b2d0cd9e432541cbbee35c3	otu38	D_0__Bacteria	0	0	0	0	0	0	0	0	1	0	0	0	0	0	0	0	0	0	0	0
010af40c19449f69d21feee156329d34	otu39	D_0__Bacteria	0	0	0	0	0	0	11	0	0	0	0	0	0	0	0	0	0	0	0	0
011580dd78ba0df9ebe6fe43f668e728	otu40	D_0__Bacteria;D_1__Patescibacteria;D_2__Parcubacteria;D_3__uncultured bacterium;D_4__uncultured bacterium;D_5__uncultured bacterium;D_6__uncultured bacterium	0	17	11	17	19	0	5	0	0	0	0	0	0	0	0	6	0	0	0	0
011ab14877b724cf59b55e5548255d3f	otu41	D_0__Bacteria;D_1__Firmicutes;D_2__Clostridia	0	0	0	0	0	4	0	0	0	0	0	0	0	0	0	0	0	0	0	0
011d3d442de93b870ea005741cb65520	otu42	D_0__Bacteria;D_1__Patescibacteria;D_2__Parcubacteria;D_3__Candidatus Campbellbacteria;D_4__microbial mat metagenome;D_5__microbial mat metagenome;D_6__microbial mat metagenome	0	0	0	0	0	0	0	0	27	29	0	0	5	0	0	0	0	0	0	0
011ee264546588d804c3ebc3543eeba8	otu43	D_0__Archaea;D_1__Euryarchaeota;D_2__Halobacteria;D_3__Halobacteriales;D_4__Haloferacaceae;D_5__uncultured;D_6__uncultured haloarchaeon	58	42	22	34	0	0	0	0	0	0	0	0	0	0	0	0	0	0	0	0
012d6878c314ea7ec698ed4ac0d9e563	otu44	D_0__Bacteria	0	0	4	0	0	0	0	0	0	0	0	0	0	0	0	0	0	0	0	0
0135ae8e86be7ae863571511df60307a	otu45	D_0__Bacteria;D_1__Proteobacteria;D_2__Alphaproteobacteria;D_3__Rickettsiales;D_4__Mitochondria	0	0	0	0	0	0	0	0	0	0	0	20	0	0	0	0	0	0	0	0
013baa3944725c15ba927793cbc43266	otu46	D_0__Bacteria	0	0	0	0	0	0	0	0	0	0	0	0	0	0	0	0	0	0	3	0
01492ab2b6061b1f3c19fcb9e1d4dbb2	otu48	D_0__Bacteria	0	0	0	0	0	0	0	0	0	0	0	0	0	0	0	0	0	0	1	0
014b99990dc5b86a0c981082d908f83e	otu49	D_0__Bacteria;D_1__Omnitrophicaeota;D_2__uncultured Omnitrophica bacterium;D_3__uncultured Omnitrophica bacterium;D_4__uncultured Omnitrophica bacterium;D_5__uncultured Omnitrophica bacterium;D_6__uncultured Omnitrophica bacterium	4	0	0	0	0	0	0	0	0	0	0	0	0	0	0	0	0	0	0	0
015285f99a45be14dc6c30af758eb745	otu50	D_0__Bacteria;D_1__Cloacimonetes;D_2__Cloacimonadia;D_3__Cloacimonadales;D_4__MSBL8	0	0	0	12	0	0	0	0	0	0	0	0	0	0	0	0	0	0	0	0
01541cb755c6c99fe0ec61a86888bbe3	otu51	D_0__Bacteria;D_1__Patescibacteria;D_2__Parcubacteria	0	0	0	17	0	0	0	0	0	0	0	0	0	0	0	0	0	0	0	0
0172edea7571c1dafd99cc68d82a6869	otu52	D_0__Bacteria;D_1__Fusobacteria;D_2__Fusobacteriia;D_3__Fusobacteriales;D_4__Leptotrichiaceae;D_5__Leptotrichia;	0	0	0	0	0	0	0	0	0	0	0	0	0	1	0	0	0	0	0	0
017c6ce2baf66d5234b8454f70c268dd	otu53	D_0__Bacteria;D_1__Patescibacteria;D_2__Parcubacteria;D_3__Candidatus Yanofskybacteria;D_4__uncultured bacterium;D_5__uncultured bacterium;D_6__uncultured bacterium	0	0	5	0	0	9	0	36	0	9	0	0	0	0	0	0	0	0	0	0
01817a452b3672f8a4147ebe8cf8cce4	otu54	D_0__Bacteria;D_1__Planctomycetes;D_2__BD7-11;D_3__uncultured bacterium;D_4__uncultured bacterium;D_5__uncultured bacterium;D_6__uncultured bacterium	0	0	7	0	0	0	0	0	0	0	0	0	0	0	0	0	0	0	0	0
018293f4f67fd919bad46207239f8795	otu55	D_0__Bacteria	0	0	0	0	0	0	0	0	0	0	0	6	0	0	0	0	0	0	0	0
01897961520383f4bc38feaf1d427901	otu56	D_0__Bacteria;D_1__Proteobacteria;D_2__Deltaproteobacteria;D_3__Desulfobacterales;D_4__Desulfobacteraceae;D_5__uncultured;D_6__uncultured Desulfatibacillum sp.	17	8	11	0	0	0	0	0	0	0	0	4	0	6	0	0	0	0	0	0
018d40496cfabe1d2ed1a09e451466d6	otu57	D_0__Bacteria	0	3	0	0	0	0	0	0	0	0	0	0	0	0	0	0	0	0	0	0
018d49fa02c04bace1ad79e49e69fa63	otu58	D_0__Bacteria;D_1__Planctomycetes;D_2__Planctomycetacia;D_3__Isosphaerales;D_4__Isosphaeraceae;D_5__uncultured;D_6__uncultured bacterium	0	0	0	0	0	0	1	0	0	0	0	0	0	0	0	0	0	0	0	0
01901134d59b036f052b2e408747a511	otu59	D_0__Archaea;D_1__Nanoarchaeaeota;D_2__Woesearchaeia	0	0	0	0	0	0	0	0	33	63	59	18	0	0	44	0	0	0	0	0
0190701df02180a43a351f34655cde82	otu60	D_0__Bacteria	0	0	0	0	0	0	0	0	0	0	3	0	0	0	0	0	0	0	0	0
019d1c93e41c803c1cdb79dccdcca5dc	otu61	D_0__Bacteria	0	0	0	0	0	0	0	0	0	0	0	0	0	0	0	1	0	0	0	0
01a400dcc776cadda78770ecea18ee87	otu62	D_0__Archaea;D_1__Nanoarchaeaeota;D_2__Nanohaloarchaeia;D_3__Nanohaloarchaeales;D_4__Nanohaloarchaeaceae;D_5__uncultured haloarchaeon;D_6__uncultured haloarchaeon	0	0	0	0	0	15	0	0	14	0	0	0	0	0	0	0	0	0	0	0
01aefc35e2a138f1eb0f999b9695c626	otu63	D_0__Bacteria	4	0	0	0	0	0	0	0	0	0	0	0	0	0	0	0	0	0	0	0
01c6e4d0b36f5aa2b4c2e5ef18ba4ccb	otu64	D_0__Bacteria;D_1__Patescibacteria;D_2__Parcubacteria;D_3__Candidatus Kaiserbacteria;D_4__uncultured bacterium;D_5__uncultured bacterium;D_6__uncultured bacterium	14	0	8	7	0	37	17	41	549	228	211	306	1133	620	830	46	41	4	18	3
01cce8c97def4d560e69c3bc93f54e16	otu65	D_0__Archaea;D_1__Euryarchaeota;D_2__Halobacteria;D_3__Halobacteriales;D_4__Haloferacaceae;D_5__Salinarchaeum;D_6__uncultured haloarchaeon	0	0	0	0	0	0	0	0	0	0	0	0	0	0	8	0	0	0	0	0
01d05ea0acdac51cf2b054d7a28edd2c	otu66	D_0__Bacteria	23	0	0	0	4	0	4	0	0	0	0	0	0	0	0	0	0	0	0	0
01d665ee0eee972bdf92dcb57085c59b	otu67	D_0__Bacteria;D_1__Bacteroidetes;D_2__Bacteroidia;D_3__Bacteroidales;D_4__Porphyromonadaceae;D_5__Porphyromonas;	0	0	0	0	0	0	0	0	0	0	0	0	0	1	0	0	0	0	0	0
01d6a525eda1ab8c7be66301286865d8	otu68	D_0__Bacteria;D_1__Patescibacteria	162	30	106	0	4	127	57	198	241	27	38	136	128	66	59	0	0	0	2	3
01de28c2a7d196627e1945c32c8bf068	otu69	D_0__Bacteria	0	0	1	0	0	0	0	0	0	0	0	0	0	0	0	0	0	0	0	0
01e03e7802e6fe3fbf9a85278b3f73eb	otu70	D_0__Bacteria	0	0	0	0	0	0	0	0	0	0	0	0	0	0	0	3	0	0	0	0
01ec9314a3610f3988ce5f471ae410a7	otu71	D_0__Bacteria	0	0	0	0	0	0	0	0	0	0	4	0	0	0	0	0	0	0	0	0
01f1807abea9a658ab0a8648ddc21d6f	otu72	D_0__Bacteria;D_1__Patescibacteria;D_2__Parcubacteria;D_3__GWA2-38-13b;D_4__uncultured bacterium;D_5__uncultured bacterium;D_6__uncultured bacterium	0	0	8	0	21	0	4	0	0	0	0	0	0	0	0	0	0	0	0	0
01f58fe4800993cb6a39a45c04486fef	otu73	D_0__Bacteria	0	0	0	0	1	0	0	0	0	0	0	0	0	0	0	0	0	0	0	0
01fb2d7a618c10dddb287a0bde1b872a	otu74	D_0__Archaea;D_1__Asgardaeota;D_2__Heimdallarchaeia;D_3__Candidatus Heimdallarchaeota archaeon AB_125;D_4__Candidatus Heimdallarchaeota archaeon AB_125;D_5__Candidatus Heimdallarchaeota archaeon AB_125;D_6__Candidatus Heimdallarchaeota archaeon AB_125	65	13	18	0	0	0	0	126	0	0	0	0	0	0	0	0	0	0	0	0
01fd7f5fead72dac1a8266493bb35d18	otu75	D_0__Bacteria	0	0	4	0	7	40	22	0	0	0	0	0	1	0	0	0	3	2	5	7
01fea0f92f06c2e1204de35562cd7abf	otu76	D_0__Archaea;D_1__Diapherotrites;D_2__Iainarchaeia;D_3__uncultured archaeon;D_4__uncultured archaeon;D_5__uncultured archaeon;D_6__uncultured archaeon	0	0	0	0	0	0	0	45	0	0	0	0	0	0	0	0	0	0	0	0
020a97bd536e8d65fc7f8fc86d3b25d6	otu77	D_0__Bacteria;D_1__Patescibacteria;D_2__Parcubacteria;D_3__uncultured bacterium;D_4__uncultured bacterium;D_5__uncultured bacterium;D_6__uncultured bacterium	0	0	0	15	0	0	0	0	0	0	0	0	0	0	0	0	0	0	0	0
020de99ffa27d144cd0646c867111d31	otu78	D_0__Bacteria;D_1__Planctomycetes;D_2__Planctomycetacia;D_3__Pirellulales;D_4__Pirellulaceae;D_5__Pir4 lineage;D_6__metagenome	0	0	0	0	0	0	0	0	0	7	0	0	0	0	0	0	0	0	0	0
0210806550e73fe658d95a1c10f76ae1	otu79	D_0__Bacteria;D_1__Kiritimatiellaeota;D_2__Kiritimatiellae;D_3__WCHB1-41	0	60	34	5	0	0	22	0	0	0	0	0	0	0	0	0	0	0	0	0
021dbcea018b5801d2c92b33c1684c9a	otu80	D_0__Bacteria;D_1__Planctomycetes;D_2__Planctomycetacia;D_3__uncultured;D_4__uncultured bacterium;D_5__uncultured bacterium;D_6__uncultured bacterium	0	0	0	0	1	0	0	0	0	0	0	0	0	0	0	0	0	0	0	0
02285d9df9ed31accdfe372fb1163758	otu81	D_0__Bacteria	0	0	0	0	0	0	0	0	0	0	0	0	0	0	0	0	0	4	0	0
02605d73f0be89fcc16ba05f219c3634	otu82	D_0__Bacteria	0	0	0	1	0	0	0	0	0	0	0	0	0	0	0	0	0	0	0	0
026d9dafbacea0f7d708fe569a2b37da	otu84	D_0__Bacteria;D_1__Patescibacteria;D_2__Parcubacteria	0	0	0	0	0	0	0	2	2	10	7	0	0	0	0	0	0	0	0	0
026e289911a180efb641d34b2bd912ca	otu85	D_0__Archaea;D_1__Euryarchaeota;D_2__Halobacteria;D_3__Halobacteriales;D_4__Haloferacaceae;D_5__uncultured;	2	0	0	0	0	0	0	0	0	0	0	0	0	0	0	0	0	0	0	0
0274a23d09367fc18ed24b1c8c6f6a5b	otu86	D_0__Bacteria	0	0	0	0	0	9	0	0	0	0	0	0	0	0	0	0	0	0	0	0
027a48875fd5ad9517017c593460a308	otu87	D_0__Bacteria;D_1__Patescibacteria;D_2__Parcubacteria;D_3__uncultured bacterium;D_4__uncultured bacterium;D_5__uncultured bacterium;D_6__uncultured bacterium	0	0	0	9	0	0	0	0	0	0	0	0	0	0	0	0	0	0	0	0
0282900586ca0da3e6b5d382df71dce8	otu88	D_0__Bacteria;D_1__Patescibacteria;D_2__Parcubacteria;D_3__Candidatus Yanofskybacteria;D_4__uncultured bacterium;D_5__uncultured bacterium;D_6__uncultured bacterium	0	0	0	0	0	12	0	0	0	0	0	0	0	0	0	0	0	0	0	0
02991b9c698bccef72c3985dc81e44c9	otu89	D_0__Bacteria;D_1__Firmicutes;D_2__Clostridia;D_3__Clostridiales;D_4__Syntrophomonadaceae;D_5__uncultured;D_6__uncultured low G+C Gram-positive bacterium	0	0	0	0	0	0	0	0	0	0	0	0	0	0	0	1	0	0	0	0
0299bbfbd7f8f3cebdd19b6dccd383d9	otu90	D_0__Archaea;D_1__Nanoarchaeaeota;D_2__Woesearchaeia;D_3__uncultured archaeon;D_4__uncultured archaeon;D_5__uncultured archaeon;D_6__uncultured archaeon	0	0	0	0	0	4	0	0	0	0	0	0	0	0	0	0	0	0	0	0
029d5949abc38833311a563fa8ca9f96	otu91	D_0__Bacteria;D_1__Actinobacteria;D_2__WCHB1-81;D_3__uncultured bacterium;D_4__uncultured bacterium;D_5__uncultured bacterium;D_6__uncultured bacterium	0	0	0	0	0	0	0	0	0	0	0	0	0	0	0	7	0	0	0	0
02a7348a63227d5c521987f0e09943c9	otu92	D_0__Archaea;D_1__Nanoarchaeaeota;D_2__Woesearchaeia;D_3__uncultured euryarchaeote;D_4__uncultured euryarchaeote;D_5__uncultured euryarchaeote;D_6__uncultured euryarchaeote	0	0	0	0	0	0	0	2	0	0	0	0	0	0	0	0	0	0	0	0
02ac80af3e6accf7dc5fae394b76380e	otu93	D_0__Bacteria;D_1__Patescibacteria;D_2__Parcubacteria;D_3__uncultured bacterium;D_4__uncultured bacterium;D_5__uncultured bacterium;D_6__uncultured bacterium	18	31	26	0	0	0	0	0	0	5	0	0	0	0	0	0	0	0	0	0
02acb946ab41b8beccc893c4be365b55	otu94	D_0__Archaea;D_1__Nanoarchaeaeota;D_2__Woesearchaeia	0	0	0	0	0	0	0	0	9	0	0	0	0	0	0	0	0	0	0	0
02b04322bbf6e8637bcaa1c3f1f5e99c	otu95	D_0__Bacteria;D_1__Patescibacteria;D_2__Parcubacteria	29	27	19	12	52	116	45	454	36	326	287	0	419	292	462	9	80	821	734	464
02b3578ac97a9c3fe58d6bc35e1cdc7a	otu96	D_0__Bacteria;D_1__Patescibacteria;D_2__Parcubacteria;D_3__Candidatus Yanofskybacteria;D_4__uncultured bacterium;D_5__uncultured bacterium;D_6__uncultured bacterium	5	16	14	0	0	0	0	0	0	0	0	0	0	0	0	0	0	0	0	0
02c7722d8ba122a43d16d919ae5de0e0	otu97	D_0__Bacteria	0	0	0	0	0	0	0	0	0	0	0	0	0	4	0	0	0	0	0	0
02ce1c64253e7fb99d62a7b3bceabd3b	otu98	D_0__Archaea;D_1__Euryarchaeota;D_2__Halobacteria;D_3__Halobacteriales;D_4__Haloferacaceae;D_5__Natronobacterium;D_6__uncultured archaeon	0	0	0	0	0	0	15	0	0	0	0	0	0	0	0	0	0	8	33	0
02ced2d57a0e1972c5cdf45917ed706c	otu99	D_0__Archaea;D_1__Crenarchaeota;D_2__Bathyarchaeia	0	0	0	0	8	0	0	0	0	0	0	0	0	0	0	0	0	0	0	0
02d3f8ade71824b6917a840ed5e66c74	otu100	D_0__Bacteria;D_1__Planctomycetes;D_2__ODP123;D_3__uncultured organism;D_4__uncultured organism;D_5__uncultured organism;D_6__uncultured organism	0	0	18	0	0	0	0	0	0	0	0	0	0	0	0	0	0	0	0	0
02d50948561ebdd1fcf62cff02be331d	otu101	D_0__Bacteria	0	3	0	0	0	0	1	8	2	0	0	0	0	0	0	0	0	6	0	0
02d94442be1c86b78861c4e7c8a3cc5e	otu102	D_0__Archaea;D_1__Euryarchaeota;D_2__Halobacteria;D_3__Halobacteriales;D_4__uncultured;D_5__uncultured haloarchaeon;D_6__uncultured haloarchaeon	0	0	15	0	7	0	15	0	0	0	0	0	0	0	0	0	0	0	0	0
02e7bfd047715fe3518a4bfa2ed75a54	otu103	D_0__Bacteria;D_1__Proteobacteria;D_2__Deltaproteobacteria;D_3__Desulfovibrionales;D_4__Desulfohalobiaceae;D_5__Desulfovermiculus;D_6__uncultured proteobacterium	0	0	0	0	0	0	0	0	0	0	0	0	0	0	0	0	0	3	0	0
030d5cbc91afd52ad546de9cb90bb568	otu104	D_0__Bacteria	0	0	5	0	0	0	0	0	0	0	0	0	0	0	0	0	0	0	0	0
0311d1a3891ea6790e84f4f187856fef	otu105	D_0__Bacteria;D_1__Planctomycetes;D_2__Planctomycetacia;D_3__Pirellulales;D_4__Pirellulaceae;D_5__Pir4 lineage;D_6__uncultured bacterium	0	0	0	0	3	0	0	0	0	0	0	0	0	0	0	0	0	0	0	0
0316044c523d98a4d6a9937438f84dd8	otu106	D_0__Bacteria	0	0	0	0	0	0	0	0	0	0	0	5	1	0	0	0	0	0	0	0
0325aab922ff0cbd71559023bb29a45b	otu107	D_0__Bacteria;D_1__Proteobacteria;D_2__Alphaproteobacteria;D_3__Rhizobiales;D_4__Beijerinckiaceae;D_5__Methylobacterium;	0	0	7	0	0	0	0	0	0	0	0	0	0	0	0	0	0	0	0	0
03354e2af62a866a012026f9a326d3eb	otu108	D_0__Bacteria;D_1__Planctomycetes;D_2__ODP123;D_3__uncultured organism;D_4__uncultured organism;D_5__uncultured organism;D_6__uncultured organism	0	0	0	0	0	0	0	11	36	4	26	15	14	4	26	119	0	10	5	11
033e4d5775941a450b4a0fcd12900d98	otu109	D_0__Bacteria	0	0	0	0	0	0	0	0	0	0	0	0	0	0	0	0	0	0	0	1
0342f42e6839a0df6b663efdf39dec88	otu110	D_0__Archaea;D_1__Euryarchaeota;D_2__Halobacteria;D_3__Halobacteriales;D_4__Haloferacaceae;D_5__uncultured;D_6__uncultured haloarchaeon	0	23	0	0	0	0	0	0	0	0	0	0	0	0	0	0	0	0	0	0
034b2beb36663ade0e55e723fc9da7f4	otu111	D_0__Bacteria	0	0	0	0	0	0	0	0	1	0	0	0	0	0	0	0	0	0	0	0
03552295ad1cd402d0826ed25c5118cc	otu112	D_0__Archaea;D_1__Euryarchaeota;D_2__Thermoplasmata;D_3__uncultured;D_4__uncultured archeon 'KTK 4A';D_5__uncultured archeon 'KTK 4A';D_6__uncultured archeon 'KTK 4A'	0	58	0	24	50	118	118	0	1547	223	271	1376	1848	343	1383	65	213	2535	1707	2242
0355362b772a98518b28bb728c948d38	otu113	D_0__Bacteria;D_1__Firmicutes;D_2__Clostridia;D_3__Clostridiales;D_4__Syntrophomonadaceae;D_5__uncultured;D_6__uncultured low G+C Gram-positive bacterium	0	0	0	2	0	0	0	0	0	0	0	0	0	0	0	0	0	0	0	0
03571d566ed12de75d6fd6a5ee6b30c9	otu114	D_0__Bacteria;D_1__WS1;D_2__uncultured organism;D_3__uncultured organism;D_4__uncultured organism;D_5__uncultured organism;D_6__uncultured organism	0	0	0	0	0	0	0	0	0	0	0	4	0	0	0	0	0	0	0	0
035eca8765eaf40c4e4eb41188059968	otu115	D_0__Archaea;D_1__Nanoarchaeaeota;D_2__Woesearchaeia	0	0	0	0	0	2	0	0	0	0	0	0	0	0	0	0	0	0	0	0
03637f0d6f03662368eb21bbb2852c64	otu116	D_0__Bacteria;D_1__Kiritimatiellaeota;D_2__Kiritimatiellae;D_3__WCHB1-41;D_4__uncultured bacterium;D_5__uncultured bacterium;D_6__uncultured bacterium	0	0	0	0	0	0	0	12	0	0	0	0	0	0	0	0	0	0	0	0
03739e9d2d44d6ca1b11d6777a1c9ebe	otu117	D_0__Bacteria	0	0	0	0	0	0	0	0	0	0	0	1	0	0	0	0	0	0	0	0
0377fe8b6ba0ed69850b5177be028fd3	otu118	D_0__Bacteria	0	0	0	0	0	0	0	0	2	0	0	0	0	0	0	0	0	0	0	0
03811112364d441352417b77b606faf8	otu119	D_0__Bacteria;D_1__Patescibacteria;D_2__Parcubacteria	0	0	0	0	6	0	0	0	0	0	0	0	0	0	0	0	0	0	0	0
038447c60abe90eec912611fba78df31	otu120	D_0__Bacteria	0	0	0	0	0	0	0	0	0	0	0	0	0	0	0	0	0	1	0	0
0385dea1254154d94b300332783a13a7	otu121	D_0__Archaea;D_1__Euryarchaeota;D_2__Halobacteria;D_3__Halobacteriales;D_4__Haloferacaceae;D_5__uncultured;D_6__uncultured archaeon	0	0	0	0	0	0	18	0	0	0	0	35	0	65	57	0	0	285	251	1312
039f58a5febcd4ef54aacb132821c030	otu122	D_0__Bacteria	0	0	2	0	0	0	0	0	0	0	0	0	0	0	0	0	0	0	0	0
03b66702caf7c1cf6e2900a0e81e31f2	otu123	D_0__Archaea;D_1__Crenarchaeota;D_2__Bathyarchaeia	0	0	0	0	0	3	0	0	0	0	0	0	0	0	0	0	0	0	0	0
03bd7c50efd64103d1d2ad07bf14f70f	otu124	D_0__Archaea;D_1__Nanoarchaeaeota;D_2__Woesearchaeia;D_3__uncultured archaeon;D_4__uncultured archaeon;D_5__uncultured archaeon;D_6__uncultured archaeon	0	0	0	0	0	0	0	0	6	0	0	0	0	0	0	0	0	0	0	0
03bee4341b5bfbad42e2c9d92eaab191	otu125	D_0__Bacteria	0	0	0	0	0	0	0	0	0	0	0	13	0	0	0	0	0	0	0	0
03c2247a43280d5a8a33e9f1f9d36d05	otu126	D_0__Bacteria	0	0	0	0	0	0	0	0	0	0	0	0	0	0	0	0	0	2	0	0
03cae04c307467d477944593824d4a6a	otu127	D_0__Archaea;D_1__Nanoarchaeaeota;D_2__Woesearchaeia	0	0	0	8	0	0	0	0	0	0	0	0	0	0	0	0	0	0	0	0
03d3739364fe079c5a8a694ed90ae040	otu128	D_0__Bacteria	0	37	0	12	0	0	0	0	0	0	0	0	0	0	0	0	0	0	0	0
03d7a5547687b0ce5130529be5333458	otu129	D_0__Bacteria	0	0	0	0	0	0	0	0	0	0	0	0	0	0	0	0	0	8	8	11
03e070978c46f7db8e3a743c9f24aa6b	otu130	D_0__Bacteria;D_1__Patescibacteria;D_2__Parcubacteria;D_3__Candidatus Kaiserbacteria;D_4__uncultured organism;D_5__uncultured organism;D_6__uncultured organism	0	0	0	0	0	0	0	0	22	0	0	0	0	0	0	0	0	0	0	0
03e4c467df0035fb65cc3706b78699e5	otu131	D_0__Bacteria	0	0	0	0	0	0	2	0	0	0	0	1	0	0	0	0	0	0	0	0
03ec7dc8ec44b904f2467d0b7ce9612c	otu132	D_0__Bacteria	0	0	0	0	0	0	0	0	0	0	0	0	0	0	0	0	0	0	1	0
03fe5e545c9180802df0e12aa20f03c7	otu133	D_0__Bacteria	0	0	0	5	0	0	0	0	0	0	0	0	0	0	0	0	0	0	0	0
03fe71217983292c967c2bb089b89d62	otu134	D_0__Bacteria;D_1__Elusimicrobia;D_2__Rs-M47;D_3__uncultured bacterium;D_4__uncultured bacterium;D_5__uncultured bacterium;D_6__uncultured bacterium	0	0	0	0	0	0	0	0	0	0	7	3	0	0	0	0	0	0	0	0
040944cf278f0528cc002f0390eeba62	otu135	D_0__Bacteria;D_1__Planctomycetes;D_2__Planctomycetacia;D_3__Isosphaerales;D_4__Isosphaeraceae;D_5__Singulisphaera;	0	0	0	0	0	0	0	0	0	4	0	0	0	0	0	0	0	0	0	0
040d020e28950189c46e3a03c7af3b47	otu136	D_0__Bacteria	0	0	0	0	0	0	0	0	0	0	0	0	0	0	0	0	0	3	0	0
0412de818b391ee9c5ebb15dd10565ee	otu137	D_0__Archaea;D_1__Nanoarchaeaeota;D_2__Woesearchaeia	0	0	0	0	0	3	0	0	0	0	0	0	0	0	0	0	0	0	0	0
0416ac4977e53a66187aa8aa2b092921	otu138	D_0__Bacteria	0	0	0	0	0	0	0	0	0	0	0	3	0	0	0	0	0	0	0	0
042af4d6dc359f47d10d0e00810cdb1b	otu139	D_0__Bacteria;D_1__Firmicutes;D_2__Bacilli;D_3__Lactobacillales;D_4__Lactobacillaceae;D_5__Lactobacillus;D_6__Lactobacillus sp. AcjLac7	0	0	20	0	0	35	0	0	29	0	27	0	0	0	0	0	0	18	0	0
042b15bc2da1af978dd0d7e298dd7aef	otu140	D_0__Archaea;D_1__Euryarchaeota;D_2__Halobacteria;D_3__Halobacteriales;D_4__uncultured;D_5__uncultured haloarchaeon;D_6__uncultured haloarchaeon	0	0	3	0	0	0	0	0	0	0	0	0	0	0	0	0	0	0	0	0
042c043ef4b3fbb0ae7c5f0c529c574d	otu141	D_0__Bacteria;D_1__Planctomycetes;D_2__Planctomycetacia;D_3__Pirellulales;D_4__Pirellulaceae;D_5__Pir4 lineage;	0	0	0	0	0	0	3	0	0	1	0	0	0	0	0	0	0	0	0	0
043db7062176772d134c5b82db3ffaf0	otu142	D_0__Archaea;D_1__Euryarchaeota;D_2__Thermoplasmata;D_3__uncultured	0	0	0	0	8	0	0	0	0	335	316	0	109	148	129	0	107	733	230	220
043fea385935035684a16afdb85c72d3	otu143	D_0__Bacteria	0	0	0	0	0	0	0	0	0	0	0	12	0	0	0	0	0	0	0	0
0446cd845087537750865843fee36c59	otu144	D_0__Archaea;D_1__Nanoarchaeaeota;D_2__Woesearchaeia	19	81	83	0	137	0	18	247	0	0	0	0	0	0	0	0	0	0	0	0
045bf6ee421b515d9842afcc5a3bc335	otu145	D_0__Archaea;D_1__Euryarchaeota;D_2__Halobacteria;D_3__Halobacteriales;D_4__Haloferacaceae;D_5__uncultured;D_6__uncultured haloarchaeon	0	0	0	0	0	0	0	0	0	0	0	0	7	0	0	0	0	0	0	0
0463cce491f83fe1d888fbc123c96a8d	otu146	D_0__Archaea;D_1__Nanoarchaeaeota;D_2__Woesearchaeia	0	0	0	0	2	0	0	0	0	0	0	0	0	0	0	0	0	0	0	0
046efd8a18f31137daf87c8a6b16ba89	otu147	D_0__Bacteria	0	0	0	0	5	0	0	0	0	0	0	0	0	0	0	0	0	0	0	0
048310b79b5221ef8e48fed6ad8562bb	otu148	D_0__Bacteria	0	0	0	0	0	0	5	0	0	0	0	0	0	0	0	0	0	0	0	0
0483857c4ffa18456c3c86b541627f20	otu149	D_0__Bacteria	0	0	0	0	3	0	0	0	0	0	0	0	0	0	0	0	0	0	0	0
048ea36fd50366600022605c1f7e36db	otu150	D_0__Bacteria;D_1__Planctomycetes;D_2__BD7-11;D_3__uncultured bacterium;D_4__uncultured bacterium;D_5__uncultured bacterium;D_6__uncultured bacterium	0	7	0	0	0	0	0	0	0	0	0	0	0	0	0	0	0	0	0	0
04942d629eb98c2447102e9df107d871	otu151	D_0__Bacteria	1	0	0	0	0	0	0	0	0	0	0	0	0	0	0	0	0	0	0	0
04a13d2cdc8c1f9c266348970269cecd	otu153	D_0__Bacteria;D_1__Planctomycetes;D_2__Planctomycetacia;D_3__Isosphaerales;D_4__Isosphaeraceae;D_5__Paludisphaera;	0	12	0	0	0	0	0	0	0	0	0	0	0	0	0	0	0	0	0	0
04aa4ddc06e31bba0026a58d5b45574a	otu154	D_0__Archaea;D_1__Euryarchaeota;D_2__Halobacteria;D_3__Halobacteriales;D_4__uncultured;D_5__uncultured haloarchaeon;D_6__uncultured haloarchaeon	0	0	0	0	0	0	26	0	0	0	0	0	0	0	0	0	0	0	0	0
04c4e1d8471a419cfc0f5ed239bb9d43	otu155	D_0__Bacteria	0	0	0	0	1	0	0	0	0	0	0	0	0	0	0	0	0	0	0	0
04dabc344b5a77d3941504e08154d0a1	otu156	D_0__Bacteria	0	0	0	0	0	0	0	0	0	0	0	0	0	0	0	0	0	0	4	0
04e83e1a81601eb2decb61bee347a1aa	otu157	D_0__Bacteria	0	0	0	0	0	0	0	0	0	0	0	0	0	0	1	0	0	0	0	0
04eb4288eab42f7c0f2be6f321ffdb16	otu158	D_0__Archaea;D_1__Euryarchaeota;D_2__Halobacteria;D_3__Halobacteriales;D_4__Halomicrobiaceae;D_5__Natronomonas;D_6__uncultured archaeon	358	410	400	265	823	595	1139	167	10	23	15	52	35	81	111	49	115	170	310	130
04ed53296c2e66498df51a1518d0a991	otu159	D_0__Bacteria;D_1__Patescibacteria;D_2__Parcubacteria	0	0	0	0	0	0	0	0	702	46	189	57	171	27	79	33	176	66	82	119
04f02a2e168fcc30fc9ab92cbe8794a6	otu160	D_0__Bacteria	0	0	0	0	0	0	0	0	0	0	0	0	0	0	6	0	0	0	0	0
04f342af482e78261e77ae1ce6f6a2c8	otu161	D_0__Bacteria;D_1__Patescibacteria;D_2__Parcubacteria;D_3__GWA2-38-13b;D_4__uncultured bacterium;D_5__uncultured bacterium;D_6__uncultured bacterium	0	0	9	0	0	0	0	0	0	0	0	0	0	0	0	0	0	0	0	0
04f3a5d0b38554250b485251cba9371b	otu162	D_0__Bacteria;D_1__Firmicutes;D_2__Clostridia;D_3__Clostridiales;D_4__Peptostreptococcaceae;D_5__Tepidibacter;	0	0	0	0	0	0	0	0	0	0	7	0	0	0	0	0	0	0	0	0
04f9033ab516db3adc41ae5e5968da61	otu163	D_0__Bacteria;D_1__Gemmatimonadetes;D_2__BD2-11 terrestrial group;D_3__uncultured bacterium;D_4__uncultured bacterium;D_5__uncultured bacterium;D_6__uncultured bacterium	0	0	0	26	0	0	9	5	0	0	0	0	0	3	0	41	0	0	0	0
0500a2ed99e4fc9487af65039792e06c	otu164	D_0__Bacteria	0	0	0	0	0	0	0	0	0	0	0	0	0	0	0	0	0	3	1	0
05036760a4228b199e35eab42d390d9c	otu165	D_0__Archaea;D_1__Euryarchaeota;D_2__Halobacteria;D_3__Halobacteriales;D_4__Haloferacaceae;D_5__uncultured;D_6__uncultured haloarchaeon	142	231	336	0	0	0	0	0	0	0	0	0	0	0	0	0	0	0	0	0
050df8e3ae7defd71caf1b223ded0f2d	otu167	D_0__Bacteria	0	0	0	0	0	0	0	0	0	0	0	1	0	0	0	0	0	0	0	0
050e71518e291c39e76e542cfdcf6d0e	otu168	D_0__Bacteria;D_1__Chloroflexi;D_2__Dehalococcoidia;D_3__GIF9;D_4__AB-539-J1;D_5__uncultured organism;D_6__uncultured organism	0	0	0	0	1	0	0	0	0	0	0	0	0	0	0	2	0	0	0	0
05168489d4c988f99173d4c92a5ff33c	otu169	D_0__Bacteria	0	0	0	0	0	0	0	0	0	0	0	3	0	0	0	0	0	0	0	0
051b0ad75e4fa7524e3da28552d05950	otu170	D_0__Bacteria;D_1__Firmicutes;D_2__Clostridia;D_3__Clostridiales;D_4__Syntrophomonadaceae;D_5__uncultured;D_6__uncultured low G+C Gram-positive bacterium	51	25	42	12	0	0	0	0	0	0	0	0	0	0	0	0	0	0	0	0
0520e40e25567f65e65e6bf65becea8e	otu171	D_0__Bacteria;D_1__Firmicutes;D_2__Clostridia;D_3__Clostridiales;D_4__Syntrophomonadaceae;D_5__uncultured;D_6__uncultured low G+C Gram-positive bacterium	0	0	0	0	14	0	0	0	0	0	0	0	0	0	0	0	0	0	0	0
053809e511bab2453f5f6238758b2c6f	otu172	D_0__Bacteria	0	0	0	0	0	0	0	0	0	0	2	0	0	0	0	0	0	0	0	0
0539c1c780894808c5264cafbbc25eab	otu173	D_0__Bacteria;D_1__Planctomycetes;D_2__Planctomycetacia;D_3__Isosphaerales;D_4__Isosphaeraceae;D_5__uncultured;	0	0	0	0	0	0	0	0	0	0	12	0	0	0	0	0	0	0	0	0
05415b9e292fd8690d92c029c37ba8ec	otu174	D_0__Bacteria;D_1__Verrucomicrobia;D_2__Verrucomicrobiae;D_3__Verrucomicrobiales;D_4__Rubritaleaceae;D_5__Luteolibacter;D_6__uncultured bacterium	0	0	0	0	0	0	0	0	47	0	0	0	0	0	0	0	0	0	0	0
05587a20fe58245a1d906c07958c96c2	otu175	D_0__Bacteria	0	0	0	0	0	0	0	0	0	0	0	0	0	5	0	0	0	0	0	0
05599bab40264b50ceca7a4321f8a4ee	otu176	D_0__Bacteria	0	0	0	0	0	0	0	0	0	0	0	0	0	0	0	3	0	0	0	0
0560cb7b8dc0c2936182cf0d0d29c41a	otu177	D_0__Bacteria;D_1__Firmicutes;D_2__Clostridia;D_3__Clostridiales;D_4__Syntrophomonadaceae;D_5__uncultured;D_6__uncultured low G+C Gram-positive bacterium	2	0	0	0	0	0	0	0	0	0	0	0	0	0	0	0	0	0	0	0
0561228ce8945bc761db234cfefac563	otu178	D_0__Bacteria	0	0	0	0	0	0	0	0	0	0	0	15	0	0	0	0	0	0	0	0
0568bc5f09e58815cab52ceca015c96f	otu180	D_0__Bacteria	0	0	0	0	0	0	0	0	6	0	0	0	0	0	0	0	0	0	0	0
056c5250e7b6f210a857d2e7ec0f1e6d	otu181	D_0__Bacteria;D_1__Patescibacteria;D_2__Parcubacteria;D_3__uncultured bacterium;D_4__uncultured bacterium;D_5__uncultured bacterium;D_6__uncultured bacterium	0	0	0	4	0	0	0	0	0	0	0	0	0	0	0	0	0	0	0	0
056f4277b90fd91fb03b3200417c59d0	otu182	D_0__Bacteria;D_1__Proteobacteria;D_2__Gammaproteobacteria;D_3__Thiomicrospirales;D_4__Thiomicrospiraceae;D_5__Thioalkalimicrobium;	4	0	0	0	7	0	2	0	0	0	0	0	0	0	0	0	0	0	0	0
0571a5dbab024b14ddcb1d86c93c9452	otu183	D_0__Bacteria	0	0	2	0	0	0	0	0	0	0	0	0	0	0	0	0	0	0	0	0
05874bcf66e5a7d8000c2ac2f0ee0e1c	otu184	D_0__Archaea;D_1__Euryarchaeota;D_2__Thermoplasmata;D_3__uncultured;D_4__uncultured archaeon;D_5__uncultured archaeon;D_6__uncultured archaeon	0	0	0	10	0	0	0	0	0	0	0	0	0	0	0	0	0	0	0	0
059e9679cf377d6a821d67ae777e8df0	otu185	D_0__Bacteria;D_1__Firmicutes;D_2__Clostridia;D_3__Clostridiales	0	0	0	7	0	0	0	0	0	0	0	0	0	0	0	0	0	0	0	0
05a2d72603845ab09c0cc3a148c08669	otu186	D_0__Bacteria	0	0	0	0	0	0	0	6	0	9	24	25	0	0	0	100	0	0	7	0
05a8b616d73f86bc86b5f010d7b5e1d3	otu187	D_0__Bacteria	0	0	0	0	0	0	0	0	0	0	0	0	0	3	0	0	0	0	0	0
05b8b4072ddeaa5f55014e5cbe608d3c	otu188	D_0__Bacteria	4	17	15	18	243	52	52	50	1992	30	92	356	119	188	64	414	0	0	0	0
05c4d230c43c1f04fc188a4aea4f6aea	otu189	D_0__Bacteria;D_1__Firmicutes;D_2__Clostridia;D_3__Clostridiales;D_4__Syntrophomonadaceae;D_5__Candidatus Contubernalis;D_6__uncultured low G+C Gram-positive bacterium	0	0	0	0	0	0	0	0	0	0	0	0	0	0	3	0	0	0	0	0
05c516773cc34d30d4ca27b02a45851d	otu190	D_0__Bacteria	0	0	0	0	0	0	0	0	0	0	3	0	0	0	0	0	0	0	0	0
05caf57e15c4059b6b66910668e50775	otu191	D_0__Bacteria	0	0	0	0	0	0	0	0	0	0	0	0	0	1	0	0	0	0	0	0
05d15bd42461414d082466e501b29212	otu192	D_0__Archaea;D_1__Euryarchaeota;D_2__Halobacteria;D_3__Halobacteriales;D_4__Haloferacaceae;D_5__Halorubrum;	0	0	0	0	0	0	0	0	137	0	11	33	134	120	311	0	46	87	78	24
05d2c8b8da0323adb45efc2193be293f	otu193	D_0__Archaea;D_1__Euryarchaeota;D_2__Halobacteria;D_3__Halobacteriales;D_4__Haloferacaceae;D_5__uncultured archaeon;D_6__uncultured archaeon	0	0	0	0	0	0	0	0	0	0	0	0	0	0	0	0	0	57	0	0
05d61bac2bb3b8871ec54f7f47fa42fd	otu194	D_0__Bacteria	0	0	0	0	0	0	0	0	0	0	0	0	0	0	0	2	0	0	0	0
05e1ef2b15f5c9384b158b24dfb49586	otu195	D_0__Bacteria	0	9	1	0	0	5	0	6	0	0	0	0	156	0	0	0	0	0	0	0
05e2c2a4ade3c9a9a69c46f53aebdc96	otu196	D_0__Archaea;D_1__Euryarchaeota;D_2__Halobacteria;D_3__Halobacteriales;D_4__Haloferacaceae;D_5__uncultured;D_6__uncultured haloarchaeon	0	0	0	0	0	0	0	0	0	0	0	0	0	0	0	0	13	0	0	0
05e7f739d8945538196d7456fb2a55b2	otu197	D_0__Bacteria	0	0	0	0	0	0	0	0	0	0	0	0	0	0	6	0	0	160	0	0
05f9a66bc4248944e0c2221eaeb18bbf	otu198	D_0__Archaea;D_1__Euryarchaeota;D_2__Halobacteria;D_3__Halobacteriales;D_4__uncultured;D_5__uncultured haloarchaeon;D_6__uncultured haloarchaeon	0	0	0	0	0	0	0	0	0	0	0	0	0	0	0	0	0	0	0	2
05fdee523cf4038173d4accab84b99e7	otu199	D_0__Archaea;D_1__Euryarchaeota;D_2__Halobacteria;D_3__Halobacteriales;D_4__Haloferacaceae;D_5__Salinarchaeum;D_6__uncultured haloarchaeon MSP9	0	0	0	0	0	0	0	0	0	0	0	0	0	0	0	0	0	0	9	0
05fe7e7c78f3b38eceba0cf2ba4865e2	otu200	D_0__Bacteria	0	0	0	0	0	0	0	0	0	0	0	0	0	0	0	1	0	0	0	0
0602e47f540020a2b5a748624af50cb1	otu201	D_0__Bacteria	0	0	0	0	1	0	0	0	0	0	0	0	0	0	0	0	0	0	0	0
060b66c4351bf285e4034a8f2b8307bc	otu202	D_0__Bacteria;D_1__Firmicutes;D_2__Clostridia;D_3__Thermoanaerobacterales;D_4__SRB2	0	0	0	0	0	0	8	0	0	0	0	0	0	0	0	29	0	0	0	0
061317d582cfb42ba10a76033fe034ab	otu204	D_0__Bacteria;D_1__Omnitrophicaeota	10	0	17	0	0	0	0	0	0	0	0	0	0	0	0	0	0	0	0	0
061704ef8b2adecb0a4e8ba867c92a69	otu205	D_0__Bacteria;D_1__Planctomycetes;D_2__Pla4 lineage;D_3__uncultured bacterium;D_4__uncultured bacterium;D_5__uncultured bacterium;D_6__uncultured bacterium	0	0	0	0	0	27	11	0	0	0	0	0	0	44	0	0	0	0	0	0
0617aff8b8c9cf46568dadc69306081a	otu206	D_0__Bacteria	0	0	0	0	0	0	0	0	0	0	0	0	0	0	0	1	0	0	0	0
0618cda7f877139fa7ce366b17b5f6ce	otu207	D_0__Bacteria	0	0	0	0	0	0	0	0	0	0	0	0	0	0	0	0	0	8	0	0
06300c323f5e3d5059fd79eff1bbc52f	otu208	D_0__Bacteria;D_1__Planctomycetes;D_2__vadinHA49;D_3__uncultured Planctomycetales bacterium;D_4__uncultured Planctomycetales bacterium;D_5__uncultured Planctomycetales bacterium;D_6__uncultured Planctomycetales bacterium	0	7	0	0	0	14	0	0	0	0	0	0	0	0	0	0	0	0	0	0
06371c2a2a992bc898dc1b297f6dbc38	otu209	D_0__Bacteria	0	0	0	0	0	0	0	0	0	0	0	0	0	0	0	0	0	4	0	0
063af0ec90e71b8b6e70c2cf7e069b0c	otu211	D_0__Archaea;D_1__Nanoarchaeaeota;D_2__Woesearchaeia;D_3__uncultured euryarchaeote;D_4__uncultured euryarchaeote;D_5__uncultured euryarchaeote;D_6__uncultured euryarchaeote	0	0	0	0	0	0	2	0	0	0	0	0	0	74	0	0	0	0	0	0
063c8222c04c8476a28f27736189a361	otu212	D_0__Bacteria	0	0	0	0	92	0	0	0	0	0	0	0	0	0	0	0	0	0	0	0
063cdca0353c543dceb63eb7c4e06236	otu213	D_0__Bacteria	0	0	0	0	0	0	0	0	0	0	0	0	0	9	0	0	0	0	0	0
0648edf8ac92a4f8b16d7c72347ebd73	otu214	D_0__Bacteria;D_1__Firmicutes;D_2__Clostridia;D_3__Clostridiales;D_4__Syntrophomonadaceae;D_5__uncultured;D_6__uncultured low G+C Gram-positive bacterium	0	0	0	0	0	0	0	0	0	11	0	0	7	12	0	0	25	13	14	12
064f3c5c18297abc2d4796ee2062e99a	otu215	D_0__Bacteria;D_1__Patescibacteria;D_2__Parcubacteria	0	0	0	0	222	107	1339	0	0	0	0	0	0	0	0	0	0	0	0	0
065406017728e5fc4aadd98405031bbe	otu216	D_0__Bacteria;D_1__Proteobacteria;D_2__Gammaproteobacteria;D_3__Pseudomonadales;D_4__Pseudomonadaceae;D_5__Pseudomonas;D_6__Pseudomonas sp. AM3	0	0	0	0	0	0	0	0	0	0	4	0	0	0	0	0	0	0	0	0
065632ac1ba645a3188d183b61b27bde	otu217	D_0__Bacteria;D_1__Firmicutes;D_2__Clostridia;D_3__Clostridiales;D_4__Syntrophomonadaceae	0	12	0	0	0	0	0	0	0	0	0	0	0	0	0	0	0	0	0	0
065c23ac14bd4c3b33290ade68563c03	otu218	D_0__Archaea;D_1__Euryarchaeota;D_2__Halobacteria;D_3__Halobacteriales;D_4__Haloferacaceae;D_5__uncultured;D_6__uncultured haloarchaeon	0	0	7	0	0	0	5	0	5	0	0	26	2	0	7	0	0	7	0	0
0661e25bdc2f96a51e2077b832b94147	otu219	D_0__Bacteria;D_1__Bacteroidetes;D_2__Bacteroidia;D_3__Bacteroidales;D_4__Prevotellaceae;D_5__Alloprevotella;	2	0	0	0	0	0	0	0	0	0	0	0	0	0	0	0	0	0	0	0
066632010fd09041eb8c88172c386ff9	otu220	D_0__Bacteria;D_1__Actinobacteria;D_2__Nitriliruptoria;D_3__Nitriliruptorales;D_4__Nitriliruptoraceae;D_5__uncultured bacterium;D_6__uncultured bacterium	0	0	0	0	0	0	7	0	0	0	0	0	0	0	0	0	0	0	0	0
0667f5ffbbacc4f7dce4cd7e542cb0a7	otu221	D_0__Bacteria;D_1__Kiritimatiellaeota;D_2__Kiritimatiellae;D_3__WCHB1-41;D_4__uncultured bacterium;D_5__uncultured bacterium;D_6__uncultured bacterium	0	0	0	0	0	0	0	11	0	0	0	0	0	0	0	0	0	0	0	0
0682425e8d5193c8054ecfdfb850bdca	otu222	D_0__Bacteria	0	0	0	0	0	0	0	0	0	0	0	0	0	0	0	5	0	0	0	0
0682e4bb85fd277c1ae1dc09a028b29d	otu223	D_0__Bacteria;D_1__Patescibacteria;D_2__Parcubacteria;D_3__uncultured bacterium;D_4__uncultured bacterium;D_5__uncultured bacterium;D_6__uncultured bacterium	0	0	0	0	0	0	0	0	24	7	0	36	65	0	11	0	0	26	36	0
06877f12408d8607f657fa5f3a3e3545	otu224	D_0__Bacteria	0	0	0	0	0	0	0	0	0	0	0	0	0	14	0	0	0	0	0	0
068b899861f3dc62980c3c472073e3ab	otu225	D_0__Bacteria;D_1__Patescibacteria;D_2__Parcubacteria	6	12	12	15	0	0	0	0	0	0	0	0	0	0	0	0	0	0	0	0
068b996fc34875f1391c01208900c85c	otu226	D_0__Bacteria;D_1__Proteobacteria;D_2__Gammaproteobacteria;D_3__Oceanospirillales;D_4__Halomonadaceae;D_5__Halomonas;	0	0	0	0	0	0	0	0	0	0	0	0	0	4	0	0	0	0	0	0
068d24455cc17bc12f59a2dd64964166	otu227	D_0__Bacteria	0	0	0	0	0	0	0	0	0	0	0	0	0	0	1	0	0	0	0	0
0694b03c30621f6aaf55a75d4a751d42	otu229	D_0__Bacteria;D_1__Firmicutes;D_2__Clostridia;D_3__Clostridiales;D_4__Syntrophomonadaceae;D_5__uncultured;D_6__uncultured low G+C Gram-positive bacterium	0	0	0	0	0	10	0	0	0	0	0	0	0	0	0	0	0	0	0	0
0694e1c5df4d03e8840cdcad64a49d65	otu230	D_0__Bacteria;D_1__Patescibacteria;D_2__Parcubacteria;D_3__Candidatus Yanofskybacteria;D_4__uncultured bacterium;D_5__uncultured bacterium;D_6__uncultured bacterium	0	10	6	0	0	0	0	0	0	0	0	0	0	0	0	0	0	0	0	0
069ab8d04fc5eee82387f30dd0e4516c	otu231	D_0__Bacteria	0	0	0	0	1	0	0	0	0	0	0	0	0	0	0	0	0	0	0	0
069d8f2570bf64022058b84b9bd731b7	otu232	D_0__Bacteria	0	0	0	0	0	0	0	0	0	10	0	0	0	0	0	0	0	0	0	0
06b735447776ab6a66e9295b459d835d	otu233	D_0__Archaea;D_1__Nanoarchaeaeota;D_2__Woesearchaeia;D_3__uncultured archaeon;D_4__uncultured archaeon;D_5__uncultured archaeon;D_6__uncultured archaeon	0	0	0	4	0	0	0	7	0	0	0	0	0	0	0	0	0	0	0	0
06be0e2399cf5c5770d225885edbb674	otu234	D_0__Bacteria;D_1__Planctomycetes;D_2__ODP123;D_3__uncultured organism;D_4__uncultured organism;D_5__uncultured organism;D_6__uncultured organism	0	0	0	0	0	0	0	0	0	16	0	0	0	0	0	0	0	0	0	0
06c7387bbf0985f9d96342d3d4c479f7	otu235	D_0__Bacteria	0	0	0	0	0	0	0	0	0	0	4	0	0	0	6	0	0	10	0	0
06c9e1accd2295b53d07f68324583db0	otu236	D_0__Archaea;D_1__Euryarchaeota;D_2__Halobacteria;D_3__Halobacteriales;D_4__Haloferacaceae;D_5__Halohasta;D_6__uncultured archaeon	0	0	0	0	0	0	0	0	0	0	0	0	46	0	0	0	0	0	0	0
06d2a490a879f5064985832935255b6b	otu237	D_0__Bacteria	0	0	0	0	0	0	0	0	0	0	0	0	0	0	0	0	0	120	0	0
06d348b6177775512947c715266d5977	otu238	D_0__Bacteria	0	0	0	0	0	0	0	0	0	0	0	2	0	0	0	0	0	0	0	0
06d53624fd5444fe9a746a0136b1c764	otu239	D_0__Bacteria	0	0	0	0	0	0	0	0	0	0	0	14	0	0	0	0	0	0	0	0
06e400a183a224e3d31ecce49ad2e1a3	otu240	D_0__Bacteria	0	0	0	0	0	0	0	0	0	0	0	13	0	0	0	0	0	0	0	0
06e645ba77df1274a5984fc612547ee4	otu241	D_0__Bacteria	0	0	3	0	0	0	0	0	0	0	0	0	0	0	0	0	0	0	0	0
06eaba3f171fe5ee2769c76cc3f6c9e3	otu242	D_0__Archaea;D_1__Euryarchaeota;D_2__Halobacteria;D_3__Halobacteriales;D_4__Haloferacaceae;D_5__Halovenus;D_6__uncultured archaeon	0	0	0	0	0	8	0	0	0	0	0	0	0	0	0	0	14	0	8	0
06fc9e7cfd5cfc4221911ba7937f9cb3	otu243	D_0__Archaea;D_1__Euryarchaeota;D_2__Halobacteria;D_3__Halobacteriales;D_4__Haloferacaceae	0	0	0	0	0	0	0	0	0	0	0	0	0	0	0	0	0	0	2	0
06fd21642ff19e3f038f39aaa3cdd6c6	otu244	D_0__Bacteria;D_1__Lentisphaerae;D_2__Oligosphaeria;D_3__Oligosphaerales;D_4__Oligosphaeraceae;D_5__uncultured Verrucomicrobia bacterium;D_6__uncultured Verrucomicrobia bacterium	0	0	0	0	0	0	0	36	123	0	0	119	12	0	0	23	0	0	0	0
06ff68fa6067df347497d18ff52fd4fd	otu245	D_0__Archaea;D_1__Euryarchaeota;D_2__Halobacteria;D_3__Halobacteriales;D_4__Haloferacaceae;D_5__Halopenitus;D_6__uncultured haloarchaeon	0	0	0	0	0	6	0	0	0	0	0	0	0	0	0	0	1	0	0	0
0700dce070377c5ed42167bb781ca921	otu246	D_0__Bacteria;D_1__Actinobacteria;D_2__Nitriliruptoria;D_3__Nitriliruptorales;D_4__Nitriliruptoraceae;D_5__uncultured actinobacterium;D_6__uncultured actinobacterium	42	76	90	27	12	36	21	0	0	0	0	0	14	0	0	0	0	0	0	0
0712d658ee56684c1aff8d9b6d3f2d3a	otu247	D_0__Bacteria	0	0	0	0	2	0	0	0	0	0	0	0	0	0	0	0	0	0	0	0
071b0ead009e6772d4b9413c83cb9c00	otu248	D_0__Bacteria;D_1__Verrucomicrobia;D_2__Verrucomicrobiae;D_3__Verrucomicrobiales;D_4__Rubritaleaceae;D_5__Luteolibacter;	0	0	0	0	0	0	0	0	0	4	0	0	0	0	0	0	0	0	0	0
07203b3220734522b3a224648da4ea22	otu249	D_0__Archaea;D_1__Euryarchaeota;D_2__Halobacteria;D_3__Halobacteriales;D_4__Haloferacaceae;D_5__uncultured;D_6__uncultured haloarchaeon	0	0	0	0	0	0	5	0	0	0	0	0	0	0	0	0	0	0	0	0
07234f90441e236eae586879742baae0	otu250	D_0__Bacteria	0	0	0	0	0	0	0	0	0	0	0	0	0	0	0	0	2	0	0	0
073067967173e1eeaedd4320b5dc246f	otu251	D_0__Bacteria	0	4	0	0	0	0	0	0	0	0	0	0	0	0	0	0	0	0	0	0
0732a64be2fad991bdde90a1fb6d6e3c	otu252	D_0__Bacteria;D_1__Fibrobacteres;D_2__Fibrobacteria;D_3__Fibrobacterales;D_4__B122;D_5__uncultured bacterium;D_6__uncultured bacterium	0	0	0	0	0	0	0	0	0	0	0	0	0	5	0	0	0	0	0	0
073b625794845985dfd70ab1200d9af9	otu253	D_0__Bacteria	0	0	0	0	0	0	0	0	0	8	0	0	0	0	0	0	0	0	0	0
0742d434b553b08ffb36856aba0e1215	otu254	D_0__Archaea;D_1__Euryarchaeota;D_2__Halobacteria;D_3__Halobacteriales;D_4__Haloferacaceae;D_5__uncultured;D_6__uncultured archaeon	0	14	27	35	0	0	5	0	0	0	0	0	0	0	0	0	0	0	0	0
074f26737898e27e54ce2f2c7062d086	otu255	D_0__Bacteria	0	0	0	0	0	0	0	0	0	0	12	0	0	10	0	0	1	13	0	0
07535022a428acf6ee5b0fb55dd4365c	otu256	D_0__Bacteria	0	0	0	0	0	0	0	0	0	0	0	3	0	0	0	0	0	0	0	0
07735ceee038460cc512d3759aa3bf64	otu257	D_0__Bacteria	0	10	3	0	0	0	0	0	0	0	0	0	0	0	0	0	0	0	0	0
0773b4c0fb227e46b98a06ccbeaf46c3	otu258	D_0__Archaea;D_1__Euryarchaeota;D_2__Thermoplasmata;D_3__uncultured;D_4__uncultured archaeon;D_5__uncultured archaeon;D_6__uncultured archaeon	0	0	0	0	0	0	0	0	0	0	8	0	0	0	0	0	0	0	0	0
077526fecc22780ce358b38e0d5dec1e	otu259	D_0__Bacteria;D_1__Planctomycetes;D_2__Planctomycetacia;D_3__Isosphaerales;D_4__Isosphaeraceae;D_5__uncultured;D_6__uncultured bacterium	0	0	0	0	0	0	0	0	0	0	0	0	0	0	6	0	0	0	0	0
07752866dc28231d629b73aae56862a6	otu260	D_0__Bacteria	0	0	0	0	0	0	0	0	0	0	0	5	0	0	0	0	0	0	0	0
077a02b45760d0054837b1d76a117c88	otu261	D_0__Bacteria;D_1__Bacteroidetes;D_2__Rhodothermia;D_3__Balneolales;D_4__Balneolaceae;D_5__Balneola;D_6__marine metagenome	0	0	0	0	0	0	0	0	0	0	3	0	0	0	9	0	0	0	0	0
0780c9d2e19fc47ada0d59d6e459bc87	otu262	D_0__Bacteria	0	0	0	0	0	0	0	0	0	0	0	2	0	0	0	0	0	0	0	0
078bfe121f70cd8ebf0aea3abedd5ea2	otu263	D_0__Bacteria	0	0	0	0	0	0	5	0	0	0	0	0	0	20	0	0	0	0	0	0
07940139233478007ba0ab646743b42b	otu264	D_0__Archaea;D_1__Euryarchaeota;D_2__Halobacteria;D_3__Halobacteriales;D_4__Haloferacaceae;D_5__uncultured;	0	0	0	0	0	0	0	0	0	0	0	0	0	0	10	0	0	0	0	0
079c06e3d0cb8ed346d9817b7ffe48d2	otu265	D_0__Bacteria	0	0	0	0	0	0	0	0	0	0	0	0	0	2	0	0	0	0	0	0
079e2659355b0666a8ab716370897c41	otu266	D_0__Archaea;D_1__Euryarchaeota;D_2__Halobacteria;D_3__Halobacteriales;D_4__uncultured;D_5__uncultured haloarchaeon;D_6__uncultured haloarchaeon	0	0	0	0	5	0	0	0	0	0	0	0	0	0	0	0	0	0	0	0
07abe5a895060826b17156879e40d48c	otu267	D_0__Bacteria;D_1__Firmicutes;D_2__Clostridia;D_3__Clostridiales;D_4__Syntrophomonadaceae;D_5__Candidatus Contubernalis;D_6__uncultured low G+C Gram-positive bacterium	0	0	0	0	0	8	0	3	0	0	5	0	0	0	32	0	0	29	0	13
07b63865b044013f41ef71b58b9536b9	otu268	D_0__Bacteria	0	0	0	1	0	0	0	0	0	0	0	0	0	0	0	0	0	0	0	0
07b91a3c234f1ce723e17c22e429d602	otu269	D_0__Archaea;D_1__Euryarchaeota;D_2__Halobacteria;D_3__Halobacteriales;D_4__uncultured;D_5__uncultured haloarchaeon;D_6__uncultured haloarchaeon	0	0	8	0	0	0	0	0	0	0	0	0	0	0	0	0	0	0	4	0
07c1ebe4f29a67da765dc001b5d960b9	otu270	D_0__Bacteria;D_1__Gemmatimonadetes;D_2__BD2-11 terrestrial group;D_3__uncultured forest soil bacterium;D_4__uncultured forest soil bacterium;D_5__uncultured forest soil bacterium;D_6__uncultured forest soil bacterium	0	0	0	0	30	0	0	0	0	0	0	0	0	0	0	0	0	0	0	0
07c3ada2c20117b31405c5a0620f10ba	otu271	D_0__Bacteria	0	0	0	0	0	0	0	0	0	0	0	5	0	0	0	0	0	0	0	0
07cd3bbd6a42096081be81aa42eaef51	otu272	D_0__Archaea;D_1__Nanoarchaeaeota;D_2__Woesearchaeia;D_3__uncultured archaeon;D_4__uncultured archaeon;D_5__uncultured archaeon;D_6__uncultured archaeon	0	0	0	4	0	0	0	0	0	0	0	0	0	0	0	0	0	0	0	0
07d5d545673d988d4117f3e933787b9a	otu273	D_0__Bacteria	0	0	0	0	0	2	0	0	0	0	0	0	0	0	0	0	0	0	0	0
07ebd45b1c01c6d2d1a653738705991c	otu274	D_0__Bacteria	0	0	0	0	0	0	0	0	0	0	0	0	0	0	0	104	0	0	0	0
07fd7cab1e174a63ffaab41dbb2ea44e	otu275	D_0__Bacteria	0	0	0	0	0	6	0	0	0	0	0	0	0	0	0	0	0	0	0	0
08016b9a2604bac1c26f3c21e81076a1	otu276	D_0__Bacteria;D_1__Proteobacteria;D_2__Alphaproteobacteria;D_3__Rhizobiales;D_4__Beijerinckiaceae;D_5__Chelatococcus;D_6__Chelatococcus sp. ID3	0	0	0	0	0	0	0	0	4	0	0	0	0	0	0	0	0	0	0	0
0801978c82a8c1d758e682ef3cd28ea6	otu277	D_0__Bacteria	0	0	0	0	0	0	0	0	0	0	0	0	0	1	0	0	0	0	7	0
0802709b0be709d931597b33d3ec6f9c	otu278	D_0__Bacteria	0	4	8	0	0	0	0	0	0	0	0	0	0	0	0	0	0	0	0	0
080389e17c67a7c15061faad5f91a8c8	otu279	D_0__Bacteria;D_1__Bacteroidetes;D_2__Bacteroidia;D_3__Bacteroidales;D_4__ML635J-4 aquatic group;D_5__uncultured Sphingobacteriia bacterium;D_6__uncultured Sphingobacteriia bacterium	0	0	0	0	0	0	0	0	0	0	0	0	0	0	0	3	0	0	0	0
0804504a19654b26b3bbc00a31be20cd	otu280	D_0__Bacteria;D_1__Kiritimatiellaeota;D_2__Kiritimatiellae;D_3__WCHB1-41;D_4__uncultured organism;D_5__uncultured organism;D_6__uncultured organism	0	0	0	0	0	0	0	0	12	0	0	0	0	0	0	0	0	0	0	0
081f5e0388ed4658474e779576eafc63	otu282	D_0__Bacteria;D_1__Patescibacteria;D_2__Parcubacteria;D_3__Candidatus Yanofskybacteria;D_4__uncultured bacterium;D_5__uncultured bacterium;D_6__uncultured bacterium	0	0	0	0	0	0	0	0	0	0	0	3	0	0	0	0	0	0	0	0
0825b440d9be5686d40b4e401e0d55ac	otu283	D_0__Bacteria	0	0	0	15	0	0	4	0	0	0	0	0	0	0	0	0	0	0	0	0
08297c9829b9747d7498d5cf5f98b79a	otu284	D_0__Bacteria;D_1__Verrucomicrobia;D_2__Verrucomicrobiae;D_3__Verrucomicrobiales;D_4__DEV7;D_5__uncultured bacterium;D_6__uncultured bacterium	23	16	65	0	56	11	24	46	0	0	1	0	0	0	0	0	0	0	0	0
082a15430735f8fb4236da430e5399fb	otu285	D_0__Bacteria	0	0	0	0	0	0	0	0	0	0	0	1	0	0	0	0	0	0	0	0
082e2dbaf5af2f2b1483f779f1a401cb	otu286	D_0__Bacteria;D_1__Lentisphaerae;D_2__Oligosphaeria;D_3__Oligosphaerales;D_4__Oligosphaeraceae;D_5__SBZC-1223;D_6__uncultured organism	4	0	0	0	8	3	4	8	3	46	32	27	1	8	16	5	0	9	4	20
08332dbb947a584cd23c6da4de658f62	otu287	D_0__Archaea;D_1__Nanoarchaeaeota;D_2__Woesearchaeia;D_3__uncultured euryarchaeote;D_4__uncultured euryarchaeote;D_5__uncultured euryarchaeote;D_6__uncultured euryarchaeote	0	0	0	0	0	0	0	0	0	0	0	101	0	0	0	0	0	0	0	0
0836fe83256281295e268285340dbc6d	otu288	D_0__Bacteria;D_1__Cloacimonetes;D_2__Cloacimonadia;D_3__Cloacimonadales;D_4__MSBL8;D_5__uncultured bacterium;D_6__uncultured bacterium	89	0	20	7	0	0	14	16	0	0	0	0	0	0	0	0	0	0	0	0
0845f21a9dc379195cd002d6abaded30	otu289	D_0__Bacteria;D_1__Omnitrophicaeota	0	0	0	0	0	0	0	0	0	0	0	0	3	0	0	0	0	0	0	0
08473607bf61a33eb9c6fafd2d7d444d	otu290	D_0__Bacteria;D_1__Firmicutes;D_2__Clostridia;D_3__D8A-2;D_4__uncultured bacterium;D_5__uncultured bacterium;D_6__uncultured bacterium	0	2	2	5	39	0	0	3	0	0	0	0	0	0	0	0	0	0	0	0
084a4ec898a014055022dd1ce589534b	otu291	D_0__Archaea;D_1__Euryarchaeota;D_2__Methanomicrobia;D_3__Methanosarcinales;D_4__Methanosarcinaceae;D_5__Methanosalsum;D_6__Methanosalsum zhilinae DSM 417	1	0	0	0	0	0	0	0	0	0	0	0	0	0	0	0	0	0	0	0
0858efffc2b07590cef741ac341cc375	otu292	D_0__Bacteria	0	0	4	0	0	0	0	0	0	0	0	0	0	0	0	0	0	0	0	0
085acbae4625eac3209da80a17066660	otu293	D_0__Archaea;D_1__Thaumarchaeota;D_2__Nitrososphaeria;D_3__Nitrososphaerales;D_4__Nitrososphaeraceae;D_5__Candidatus Nitrososphaera;	0	0	0	0	0	0	0	0	0	0	0	0	0	58	0	22	0	0	0	0
085e121447bfb2f79f1f2a46cc5574b3	otu294	D_0__Bacteria;D_1__Patescibacteria;D_2__Parcubacteria;D_3__Paceibacterales;D_4__Paceibacteraceae;D_5__Candidatus Paceibacter;D_6__uncultured bacterium	0	0	0	0	0	0	0	0	0	0	0	0	0	0	0	0	0	0	0	12
0862ab45b3188fae1517a658b3927df6	otu295	D_0__Archaea;D_1__Nanoarchaeaeota;D_2__Woesearchaeia	0	0	0	0	0	0	0	0	40	40	28	36	68	0	0	0	0	64	33	52
08638c26d7d87b96fc5303f85082ca88	otu296	D_0__Bacteria	0	0	0	0	5	0	0	0	0	0	0	0	0	0	0	0	0	0	0	0
08640adc7743e7bd8111736be5cd6867	otu297	D_0__Bacteria	0	0	0	0	0	0	2	0	0	0	0	0	0	0	0	0	0	0	0	0
0880f7d85e5fc061ee7431949bc90cba	otu299	D_0__Bacteria;D_1__Omnitrophicaeota;D_2__uncultured Omnitrophica bacterium;D_3__uncultured Omnitrophica bacterium;D_4__uncultured Omnitrophica bacterium;D_5__uncultured Omnitrophica bacterium;D_6__uncultured Omnitrophica bacterium	0	0	0	0	0	0	0	7	0	0	0	0	0	0	0	0	0	0	0	0
088989ef9fa2807a0ea81b6fff5d71ff	otu300	D_0__Bacteria	0	0	0	0	0	0	0	0	0	0	4	0	0	0	0	0	0	0	0	0
08899224831c22e04bbaa873b232e8e2	otu301	D_0__Bacteria	0	0	0	0	0	0	0	0	13	0	0	0	6	0	0	0	0	0	0	0
088db6730e48e4880772e860fdf9ccb0	otu302	D_0__Bacteria;D_1__Planctomycetes;D_2__Planctomycetacia;D_3__Pirellulales;D_4__Pirellulaceae;D_5__Pirellula;D_6__uncultured Planctomycetaceae bacterium	0	0	0	0	0	0	0	0	0	0	5	0	0	0	0	0	0	0	0	0
088fc52ba8a1a9229168a344670c42c6	otu303	D_0__Bacteria;D_1__Actinobacteria;D_2__Actinobacteria;D_3__Micromonosporales;D_4__Micromonosporaceae;D_5__Longispora;D_6__uncultured bacterium	0	6	0	0	0	0	0	0	0	0	0	0	0	0	0	0	0	0	0	0
089178b04f721ceb8a5623c79f9c6943	otu304	D_0__Bacteria	0	0	0	0	0	0	0	0	0	0	0	4	0	0	0	0	0	0	0	0
089384d2b953146b75f3d6ddd257a5d9	otu305	D_0__Bacteria;D_1__Planctomycetes;D_2__Planctomycetacia;D_3__Planctomycetales;D_4__Rubinisphaeraceae;D_5__Planctomicrobium;D_6__uncultured bacterium	0	0	0	0	0	0	0	0	0	0	0	0	0	0	2	0	0	0	0	0
089f9919b395dff2f84aedb4a1cec908	otu306	D_0__Bacteria;D_1__Planctomycetes;D_2__Planctomycetacia;D_3__Pirellulales;D_4__Pirellulaceae;D_5__Pirellula;D_6__uncultured organism	16	18	76	0	68	0	43	14	0	0	0	0	0	0	0	0	0	0	0	0
08a2a8240a91db5f497b4a80a619b911	otu307	D_0__Bacteria	0	0	0	8	0	0	0	0	0	0	0	0	0	0	0	0	0	0	0	0
08ac85661bbc71dcbcc4c4157e2fa96d	otu308	D_0__Bacteria	0	0	0	0	0	0	0	0	0	0	0	10	0	0	0	0	0	0	0	0
08af37c67302bd79d41ad8ff5d905674	otu309	D_0__Archaea;D_1__Nanoarchaeaeota;D_2__Woesearchaeia	0	0	0	0	0	0	0	0	0	5	0	0	0	0	0	0	0	0	0	0
08aff4f0d6e7a7a6f3471b67f1b355db	otu310	D_0__Bacteria;D_1__Planctomycetes;D_2__vadinHA49;D_3__uncultured bacterium;D_4__uncultured bacterium;D_5__uncultured bacterium;D_6__uncultured bacterium	0	0	0	0	0	0	0	0	0	0	0	0	0	4	0	0	0	0	0	0
08bc6b1b5fff8a1c5717a1c7a21acd31	otu311	D_0__Archaea;D_1__Nanoarchaeaeota;D_2__Woesearchaeia;D_3__uncultured euryarchaeote;D_4__uncultured euryarchaeote;D_5__uncultured euryarchaeote;D_6__uncultured euryarchaeote	0	3	0	0	0	0	0	3	20	0	0	39	22	4	5	0	0	0	0	0
08be012a0fc9c0e3b52ef47014e40a49	otu312	D_0__Bacteria;D_1__Actinobacteria;D_2__Nitriliruptoria;D_3__Nitriliruptorales;D_4__Nitriliruptoraceae;D_5__uncultured bacterium;D_6__uncultured bacterium	0	0	0	0	0	0	0	0	0	0	0	0	0	8	0	0	0	0	0	0
08cbd4b8536d583e09f17c12623f6c2e	otu313	D_0__Bacteria	0	0	0	0	0	0	0	0	0	0	0	0	0	0	2	0	0	0	0	0
08cfc99cbf5680758e79746d7b2ca393	otu314	D_0__Bacteria	0	0	0	0	0	0	0	0	0	0	0	0	0	0	0	1	0	0	0	0
08d4746d2379c87928d3963b00cef035	otu315	D_0__Bacteria	0	0	0	0	0	0	0	0	0	0	0	0	0	0	0	0	0	3	0	0
08d7e415e87c31688071e27da272d2f9	otu316	D_0__Archaea;D_1__Nanoarchaeaeota;D_2__Woesearchaeia	0	0	0	0	0	0	0	0	0	0	0	6	0	0	0	0	0	0	0	0
08d7f834710481f892e09f2d0cd12da3	otu317	D_0__Bacteria;D_1__Bacteroidetes;D_2__Bacteroidia;D_3__Sphingobacteriales;D_4__Lentimicrobiaceae	0	0	0	0	0	0	0	0	0	0	0	0	0	0	0	5	0	0	0	0
08ed51874e5c7a670e0fda8984268879	otu318	D_0__Archaea;D_1__Nanoarchaeaeota;D_2__Woesearchaeia;D_3__Candidatus Staskawiczbacteria bacterium RIFCSPHIGHO2_1_FULL_34_27;D_4__Candidatus Staskawiczbacteria bacterium RIFCSPHIGHO2_1_FULL_34_27;D_5__Candidatus Staskawiczbacteria bacterium RIFCSPHIGHO2_1_FULL_34_27;D_6__Candidatus Staskawiczbacteria bacterium RIFCSPHIGHO2_1_FULL_34_27	0	0	0	0	0	0	0	0	0	0	0	0	0	0	0	6	0	0	0	0
08ed95efea40eedac9fe9cb1d6555c8a	otu319	D_0__Archaea;D_1__Euryarchaeota;D_2__Halobacteria;D_3__Halobacteriales;D_4__Haloferacaceae	0	0	0	0	16	0	0	0	1	0	0	0	0	0	0	0	0	0	0	0
08f94463e552fb63a41699cacaaff3e0	otu320	D_0__Bacteria	0	0	0	0	0	0	0	0	4	0	0	0	0	0	0	0	0	0	0	0
08fa6db46b018cb81058365c5d95c291	otu321	D_0__Bacteria	0	0	0	0	0	0	0	0	0	0	0	0	10	0	0	0	0	0	0	0
0900ec1167a471ea352e02f4219d55f4	otu322	D_0__Bacteria;D_1__Planctomycetes;D_2__ODP123;D_3__uncultured organism;D_4__uncultured organism;D_5__uncultured organism;D_6__uncultured organism	5	0	0	0	0	8	14	13	12	0	0	0	0	0	0	0	0	0	0	0
0901969908446df84b1514434a533ee9	otu323	D_0__Bacteria	0	0	0	3	0	0	0	0	0	0	0	0	0	0	0	0	0	0	0	0
0911448ebe20c40e4c25bb6a6d044c1d	otu324	D_0__Bacteria;D_1__Verrucomicrobia;D_2__Verrucomicrobiae;D_3__Verrucomicrobiales;D_4__Verrucomicrobiaceae;D_5__uncultured;D_6__uncultured bacterium	3	19	14	4	834	14	290	57	0	83	65	0	0	63	12	4	3	0	4	2
0916ba3301705b190fbe86ad965f7021	otu325	D_0__Archaea;D_1__Nanoarchaeaeota;D_2__Nanohaloarchaeia;D_3__Nanohaloarchaeales;D_4__Nanohaloarchaeaceae;D_5__uncultured haloarchaeon MSP41;D_6__uncultured haloarchaeon MSP41	0	2	0	0	0	0	0	0	0	0	0	0	0	0	0	0	0	0	0	0
0919f70c98cf48e166dcc92b4e34475c	otu326	D_0__Bacteria	0	0	0	0	0	6	0	0	0	0	0	0	0	0	0	0	0	0	0	0
092104c72245970133f5c249d1f8e425	otu327	D_0__Archaea;D_1__Nanoarchaeaeota;D_2__Woesearchaeia;D_3__archaeon GW211_AR13;D_4__archaeon GW211_AR13;D_5__archaeon GW211_AR13;D_6__archaeon GW211_AR13	0	0	0	0	0	9	0	30	21	85	63	0	0	0	6	0	0	0	0	0
092790b5737f1c1dcd8e0c09b1c6787f	otu329	D_0__Bacteria	0	0	0	0	0	0	0	0	0	0	0	0	0	5	0	0	0	0	0	17
09279cab1aa7ea6d24f8231bbdbf584e	otu330	D_0__Bacteria	0	0	0	0	0	0	0	0	0	0	0	0	0	0	0	0	0	0	0	3
092a29b79278e71a7886e6312ef6c8fd	otu332	D_0__Bacteria;D_1__Planctomycetes;D_2__Planctomycetacia;D_3__Pirellulales;D_4__Pirellulaceae	13	19	38	0	1	0	7	0	0	0	0	0	0	0	0	0	0	0	0	0
0931be886fd6dd28bd9872021f082f09	otu333	D_0__Bacteria;D_1__Lentisphaerae;D_2__Oligosphaeria;D_3__Oligosphaerales;D_4__Oligosphaeraceae;D_5__uncultured Verrucomicrobia bacterium;D_6__uncultured Verrucomicrobia bacterium	0	0	0	0	0	0	0	0	0	0	0	0	0	55	0	0	0	0	0	0
093700e76445710a78aa10112ca71de0	otu334	D_0__Bacteria;D_1__Planctomycetes;D_2__Planctomycetacia;D_3__Isosphaerales;D_4__Isosphaeraceae;D_5__uncultured;D_6__uncultured bacterium	0	0	0	0	0	0	0	0	0	0	0	0	0	0	0	9	0	0	0	0
093dabed2cdca30264dfa70be1de6355	otu335	D_0__Archaea;D_1__Euryarchaeota;D_2__Thermoplasmata;D_3__Marine Group II;D_4__uncultured haloarchaeon;D_5__uncultured haloarchaeon;D_6__uncultured haloarchaeon	0	13	6	0	4	7	15	6	0	0	0	0	0	0	4	0	0	0	0	0
09410cd80ce3ae119f39e67db68842f0	otu336	D_0__Bacteria	0	0	0	0	0	0	0	0	0	0	0	0	2	0	0	0	0	0	0	0
094512ac3260a030185c6dc4530dfd8b	otu337	D_0__Bacteria	0	0	0	9	0	0	0	0	0	0	0	0	0	0	0	0	0	0	0	0
0945f187a7d3588f66d1a2093945c015	otu338	D_0__Bacteria	0	0	0	0	0	0	0	0	0	0	0	0	0	0	5	0	0	0	0	0
094df577189905232f912d668a6a89ad	otu339	D_0__Bacteria;D_1__Patescibacteria;D_2__Parcubacteria;D_3__uncultured bacterium;D_4__uncultured bacterium;D_5__uncultured bacterium;D_6__uncultured bacterium	6	0	10	0	0	0	0	0	0	0	0	0	0	0	0	0	0	0	0	0
095183cab4bf276351afb88e4a294f1f	otu340	D_0__Bacteria;D_1__Proteobacteria;D_2__Gammaproteobacteria;D_3__Orbales;D_4__Orbaceae;D_5__Gilliamella;	0	0	0	0	0	0	0	0	34	0	0	0	0	0	0	0	0	0	0	0
095496b3a6ed7ec116b7ac34c9e37d45	otu341	D_0__Bacteria	0	0	0	0	0	0	0	0	0	0	0	0	0	6	0	0	0	0	0	0
0955022ac2559227bd5a67aca84f009b	otu342	D_0__Bacteria;D_1__Firmicutes;D_2__Bacilli;D_3__Bacillales;D_4__Bacillaceae;D_5__Bacillus;	0	0	0	0	0	0	3	0	0	0	0	0	0	0	0	0	0	0	0	0
095bf28c3676965efd5369f4dbc955d0	otu343	D_0__Bacteria;D_1__Firmicutes;D_2__Clostridia;D_3__Clostridiales;D_4__TSAC18;D_5__uncultured bacterium;D_6__uncultured bacterium	0	5	0	0	0	0	0	0	0	0	0	0	0	0	0	0	0	0	0	0
095f45a984c137d71cc4f11fd8a090fe	otu344	D_0__Bacteria;D_1__Planctomycetes;D_2__Planctomycetacia;D_3__Pirellulales;D_4__Pirellulaceae;D_5__Pir4 lineage;D_6__uncultured organism	25	35	31	58	299	66	157	117	224	0	83	242	12	44	0	297	0	0	0	0
09654024fd40e4803da683500913cadb	otu345	D_0__Bacteria;D_1__Patescibacteria;D_2__Parcubacteria	0	0	0	0	0	0	0	0	0	84	58	0	11	0	0	0	0	0	0	0
09694730c126e8950cd658dec434739c	otu346	D_0__Bacteria	0	0	8	5	0	0	0	0	0	0	0	0	0	0	0	0	0	0	0	0
0972997e8ce183d1e207cbc389a593ad	otu347	D_0__Bacteria;D_1__Proteobacteria;D_2__Gammaproteobacteria;D_3__Alteromonadales;D_4__Marinobacteraceae;D_5__Marinobacter;	0	6	0	0	0	0	0	0	0	0	0	0	0	0	0	0	0	0	0	0
0975aa210d72c8a00500316b5ccd9366	otu348	D_0__Bacteria;D_1__Patescibacteria;D_2__Parcubacteria;D_3__Candidatus Kaiserbacteria;D_4__uncultured organism;D_5__uncultured organism;D_6__uncultured organism	0	0	0	0	0	0	0	0	0	0	0	8	0	0	0	0	0	0	0	0
0977df5ebdd8bf6a1a36b9fc2467705c	otu349	D_0__Bacteria;D_1__Planctomycetes;D_2__ODP123;D_3__uncultured organism;D_4__uncultured organism;D_5__uncultured organism;D_6__uncultured organism	17	62	20	21	6	0	4	0	7	0	0	0	0	0	0	7	0	0	0	0
09788f895a63849c6be0d8bc64a714b0	otu350	D_0__Bacteria	0	0	3	0	0	0	0	0	0	0	0	0	0	0	0	0	0	0	0	0
097aef294e24af295f6783f3fe231d70	otu351	D_0__Bacteria	0	12	0	0	0	0	0	0	0	0	0	0	0	0	0	0	0	0	0	0
097aef76ebfc85c371968f590385c55b	otu352	D_0__Bacteria;D_1__Gemmatimonadetes;D_2__BD2-11 terrestrial group;D_3__uncultured bacterium;D_4__uncultured bacterium;D_5__uncultured bacterium;D_6__uncultured bacterium	2	0	0	0	0	0	0	0	0	0	0	0	0	0	0	0	0	0	0	0
0985cd9cfdc3fe4bcb9c49a3923ea868	otu353	D_0__Bacteria;D_1__Chloroflexi;D_2__Anaerolineae;D_3__Anaerolineales;D_4__Anaerolineaceae;D_5__ADurb.Bin12;D_6__uncultured bacterium	0	0	0	0	11	0	0	0	0	0	0	0	0	0	0	0	0	0	0	0
0994634520a03dd643ecb26b89eb2b64	otu354	D_0__Bacteria	0	0	0	0	0	0	0	0	0	0	14	0	0	0	0	0	0	0	0	0
0995522121368cd4b6d1b68071a20053	otu355	D_0__Archaea;D_1__Euryarchaeota;D_2__Halobacteria;D_3__Halobacteriales;D_4__Haloferacaceae	36	30	40	16	0	0	13	8	0	0	10	32	0	7	0	0	0	0	0	0
099f1f943a6a6222455d66858fa24cca	otu356	D_0__Bacteria;D_1__Proteobacteria;D_2__Gammaproteobacteria;D_3__Nitrococcales;D_4__Nitrococcaceae	0	0	0	0	0	0	0	0	0	0	5	0	0	0	0	0	0	0	0	0
099f7c9bc5a850f7c389bfdd753cfb47	otu357	D_0__Bacteria	0	0	0	0	0	0	0	0	0	0	0	0	0	0	0	3	0	0	0	0
09a90674df69ca54b4b8b9222b7fd059	otu358	D_0__Archaea;D_1__Euryarchaeota;D_2__Thermoplasmata;D_3__uncultured;D_4__uncultured archaeon;D_5__uncultured archaeon;D_6__uncultured archaeon	0	0	1	0	0	0	0	0	0	0	0	0	0	0	0	0	0	0	0	0
09ab308271b7f1e01664c1fb688b807c	otu359	D_0__Bacteria	0	0	0	0	2	0	0	0	0	0	0	0	0	0	0	0	0	0	0	0
09b1d4fe44ba9a946566d849f324deca	otu360	D_0__Bacteria;D_1__Planctomycetes;D_2__Planctomycetacia;D_3__Pirellulales;D_4__Pirellulaceae;D_5__uncultured;D_6__uncultured bacterium	188	187	199	281	264	51	226	61	81	0	0	0	0	0	0	458	0	0	0	0
09b476faa50ab2acd2904e975c2dd2e0	otu361	D_0__Bacteria	0	0	0	0	0	0	0	0	0	0	0	0	0	10	0	0	0	0	0	0
09b661958288e8690e563734309486b9	otu362	D_0__Archaea;D_1__Euryarchaeota;D_2__Halobacteria;D_3__Halobacteriales;D_4__uncultured;D_5__uncultured haloarchaeon;D_6__uncultured haloarchaeon	0	0	0	0	0	0	0	0	0	0	0	0	2	0	0	0	0	0	0	0
09c95b99fdd9865b915966cb1579f57a	otu363	D_0__Bacteria;D_1__Proteobacteria;D_2__Gammaproteobacteria	0	4	0	0	0	0	0	0	0	0	6	0	0	0	0	0	0	0	0	0
09d5c9c021018a897e8c5fdcbe3dfe00	otu364	D_0__Archaea;D_1__Euryarchaeota;D_2__Halobacteria;D_3__Halobacteriales;D_4__Haloferacaceae;D_5__Halovenus;D_6__uncultured haloarchaeon	68	18	9	9	12	0	11	15	0	3	0	2	0	7	0	11	0	0	0	14
09d92f50058c747653cb068af8071cad	otu365	D_0__Archaea;D_1__Euryarchaeota;D_2__Thermoplasmata;D_3__SG8-5;D_4__uncultured archaeon;D_5__uncultured archaeon;D_6__uncultured archaeon	0	0	0	0	0	0	0	0	0	0	0	26	0	0	0	0	0	0	0	0
09dc44880f04041f06d83434c7acca67	otu366	D_0__Archaea;D_1__Nanoarchaeaeota;D_2__Woesearchaeia;D_3__uncultured euryarchaeote;D_4__uncultured euryarchaeote;D_5__uncultured euryarchaeote;D_6__uncultured euryarchaeote	0	0	0	0	4	157	70	9	8	118	96	5	36	0	13	0	0	0	0	0
09e4e1e932fbd551fcf90da5a4b583c6	otu367	D_0__Bacteria	0	0	0	0	0	0	0	0	0	0	0	0	0	0	0	1	0	0	0	0
09f2d3c0fb5992ca182ac3271c63809d	otu368	D_0__Bacteria	0	0	0	0	1	0	0	0	0	0	0	0	0	0	0	0	0	0	0	0
09f5c7f3c903e1c054760a9fc1e9f237	otu369	D_0__Bacteria	0	0	0	0	0	0	0	7	0	0	0	0	0	0	0	0	0	0	0	0
09f7d5b54084f155d63f8c20623c4e6d	otu370	D_0__Bacteria	0	2	0	0	0	0	0	0	0	0	0	0	0	0	0	0	0	0	0	0
0a01829da652047a2cad71e4b3e85e20	otu371	D_0__Bacteria	0	0	0	0	0	0	0	0	0	0	0	3	0	0	0	0	0	0	0	0
0a14c1948f18b4ebbe5480dfe67b9eac	otu372	D_0__Bacteria	0	0	0	0	0	0	0	0	0	0	0	7	0	0	0	0	0	0	0	0
0a1ce6b4d1eb9f79aa8f1d322a486a37	otu373	D_0__Bacteria	22	0	0	0	0	0	0	0	0	0	0	0	0	0	0	0	0	0	0	0
0a1e7a764becc3dc9d986043ccd8ab4d	otu374	D_0__Bacteria	0	0	0	0	0	0	0	0	0	0	0	0	0	0	0	0	11	0	0	1
0a2043c251b5ef86f6c5c0e0901385e4	otu375	D_0__Bacteria	0	0	2	0	0	0	0	0	0	0	0	0	0	0	0	0	0	0	0	0
0a335251f3011da113b9749fe95196df	otu376	D_0__Bacteria;D_1__Kiritimatiellaeota;D_2__Kiritimatiellae;D_3__WCHB1-41;D_4__uncultured bacterium;D_5__uncultured bacterium;D_6__uncultured bacterium	0	0	0	0	0	0	0	0	2	0	0	0	0	0	0	0	0	0	0	0
0a3fc0a09b840defbe0db876c5af3654	otu377	D_0__Archaea;D_1__Nanoarchaeaeota;D_2__Woesearchaeia;D_3__Candidatus Diapherotrites archaeon ADurb.Bin253;D_4__Candidatus Diapherotrites archaeon ADurb.Bin253;D_5__Candidatus Diapherotrites archaeon ADurb.Bin253;D_6__Candidatus Diapherotrites archaeon ADurb.Bin253	26	13	11	0	0	9	14	10	0	0	0	0	0	0	0	0	0	0	0	0
0a4c9e96754f77f729d9fbf3c3467489	otu378	D_0__Bacteria;D_1__Omnitrophicaeota;D_2__uncultured bacterium;D_3__uncultured bacterium;D_4__uncultured bacterium;D_5__uncultured bacterium;D_6__uncultured bacterium	0	0	0	0	0	0	0	0	0	12	0	0	0	0	0	0	0	0	0	0
0a56b4adca42633d15b45834050526fe	otu379	D_0__Archaea;D_1__Nanoarchaeaeota;D_2__Woesearchaeia;D_3__uncultured archaeon;D_4__uncultured archaeon;D_5__uncultured archaeon;D_6__uncultured archaeon	0	0	0	0	0	0	0	4	0	0	0	0	0	0	0	0	0	0	0	0
0a57815e4da527d815d9158c119b820a	otu380	D_0__Bacteria;D_1__Chlamydiae;D_2__LD1-PA32;D_3__metagenome;D_4__metagenome;D_5__metagenome;D_6__metagenome	0	0	0	0	0	0	0	6	0	0	0	0	0	0	0	0	0	0	0	0
0a5dd0ace2551bd71216f6dab7effc77	otu381	D_0__Bacteria	0	0	0	0	0	0	0	0	0	0	0	0	0	0	0	0	0	2	0	0
0a5e2c05f41591a36d964113e257e915	otu382	D_0__Bacteria	0	0	0	0	0	0	1	0	0	0	0	0	0	0	0	2	0	0	0	0
0a7808c48a5aa7a6e03c57bfb2faf06e	otu384	D_0__Bacteria	0	0	0	0	0	0	5	0	0	0	0	0	0	0	0	0	0	0	0	0
0a7b033838946522d754a06a6facad93	otu385	D_0__Bacteria	0	0	0	0	0	0	0	0	1	0	0	0	0	0	0	0	0	0	0	0
0a7e494a3e288234ea4d184d87c5e0a0	otu386	D_0__Archaea;D_1__Nanoarchaeaeota;D_2__Woesearchaeia;D_3__uncultured euryarchaeote;D_4__uncultured euryarchaeote;D_5__uncultured euryarchaeote;D_6__uncultured euryarchaeote	0	0	0	0	0	0	0	0	0	5	3	0	0	0	0	0	0	0	0	0
0a8620a42a3ac3dc568dd72cb7b29a56	otu387	D_0__Bacteria;D_1__Firmicutes;D_2__Clostridia;D_3__Clostridiales;D_4__Syntrophomonadaceae;D_5__uncultured;D_6__uncultured low G+C Gram-positive bacterium	2	16	0	0	0	2	0	0	0	0	0	0	0	0	0	0	0	0	0	0
0a8b79c915b082b3ce5ae84add231f73	otu388	D_0__Bacteria;D_1__Firmicutes;D_2__Clostridia;D_3__Clostridiales;D_4__Family XVIII;D_5__uncultured;D_6__bacterium T33.8	0	0	0	0	0	0	0	0	0	1	0	0	0	0	0	0	0	0	0	0
0a96394e05817de5356ec61c437adf60	otu389	D_0__Archaea;D_1__Euryarchaeota;D_2__Halobacteria;D_3__Halobacteriales;D_4__Haloferacaceae;D_5__Halobiforma;D_6__Halobiforma sp. BNMIITR	0	0	0	0	0	9	0	0	0	0	0	0	0	0	0	0	0	0	0	0
0a9859bcbd8a72b7d0440c5b6100a1a4	otu390	D_0__Bacteria	0	0	2	0	0	0	0	0	0	0	0	0	0	0	0	0	0	0	0	0
0aa4032b6e162f0f2633ca5541570437	otu391	D_0__Bacteria;D_1__Firmicutes;D_2__Clostridia;D_3__Clostridiales;D_4__Lachnospiraceae;D_5__Tyzzerella 3;D_6__uncultured bacterium	11	0	0	0	0	0	0	0	0	0	0	0	0	0	0	0	0	0	0	0
0ab213db291e30ada1d8a3c2d8ec3de3	otu392	D_0__Archaea;D_1__Euryarchaeota;D_2__Halobacteria;D_3__Halobacteriales;D_4__uncultured;D_5__uncultured haloarchaeon;D_6__uncultured haloarchaeon	43	39	13	0	25	92	46	42	0	0	0	18	18	43	27	5	16	45	90	87
0ab8bb613517cb3b086a5529e577e42d	otu393	D_0__Bacteria	0	0	0	0	0	0	6	0	0	0	0	0	0	0	0	0	0	0	0	0
0abb05a36f7efb2ca745aabcc67d7f86	otu394	D_0__Archaea;D_1__Nanoarchaeaeota;D_2__Woesearchaeia;D_3__uncultured euryarchaeote;D_4__uncultured euryarchaeote;D_5__uncultured euryarchaeote;D_6__uncultured euryarchaeote	0	0	0	0	0	2	0	0	0	0	0	0	0	0	0	0	0	0	0	0
0ac1612e90f664d56d62106cee0cc695	otu395	D_0__Archaea;D_1__Nanoarchaeaeota;D_2__Woesearchaeia;D_3__uncultured euryarchaeote;D_4__uncultured euryarchaeote;D_5__uncultured euryarchaeote;D_6__uncultured euryarchaeote	0	0	0	0	0	0	0	0	0	0	0	0	0	0	0	0	0	3	0	0
0adb5a574d51cea30af1a864e0fd7a1c	otu396	D_0__Bacteria;D_1__Cloacimonetes;D_2__Cloacimonadia;D_3__Cloacimonadales;D_4__MSBL8;D_5__uncultured bacterium;D_6__uncultured bacterium	0	1	0	0	0	0	0	0	0	0	0	0	0	0	0	0	0	0	0	0
0add86d3dc747453eb2d042d534ac4ee	otu397	D_0__Bacteria	0	0	0	0	0	0	0	0	0	0	1	0	0	0	0	0	0	0	0	0
0aeddd0fbfca8567bf7515f071943f5f	otu398	D_0__Bacteria;D_1__Bacteroidetes;D_2__Bacteroidia;D_3__Bacteroidales;D_4__ML635J-4 aquatic group;D_5__uncultured Bacteroidetes bacterium;D_6__uncultured Bacteroidetes bacterium	0	0	0	0	0	0	7	0	0	0	0	0	0	0	0	0	0	0	0	0
0af08f8cc85178f982bf7d3138f2ed77	otu399	D_0__Bacteria	0	0	0	0	0	0	0	0	0	0	0	5	0	0	0	0	0	0	0	0
0af7a12ed2d1aa147c5fe4463ee4e896	otu400	D_0__Bacteria	0	0	0	0	0	0	0	0	0	0	0	0	0	2	0	0	0	0	0	0
0af9b7cf3780074229747bc6cd55f51c	otu401	D_0__Archaea;D_1__Euryarchaeota;D_2__Methanobacteria;D_3__Methanobacteriales;D_4__Methanobacteriaceae;D_5__Methanobacterium;	0	0	10	0	8	0	0	0	0	0	0	0	0	0	0	0	0	0	0	0
0b0358eedbec9f893cf7788b17dc84a5	otu403	D_0__Bacteria	0	0	0	5	0	0	0	0	0	0	0	0	0	0	0	0	0	0	0	0
0b03fb8f26352e4074edbd5dafd130d6	otu404	D_0__Bacteria	0	0	0	0	2	0	0	0	0	0	0	0	0	0	0	0	0	0	0	0
0b0817c50e1564d9ec8c00f19432bce4	otu405	D_0__Archaea;D_1__Nanoarchaeaeota;D_2__Woesearchaeia	0	18	0	0	0	385	66	6	0	17	36	10	1	0	0	0	0	0	0	0
0b09de155f4879fa25f4529581d4f799	otu406	D_0__Bacteria;D_1__Planctomycetes;D_2__Planctomycetacia;D_3__Pirellulales;D_4__Pirellulaceae;D_5__Pir1 lineage;D_6__uncultured bacterium	0	0	0	2	0	0	0	0	0	0	0	0	0	0	0	0	0	0	0	0
0b120f72c68a9d8263b59d9bf4e50455	otu407	D_0__Bacteria;D_1__Lentisphaerae;D_2__Oligosphaeria;D_3__Oligosphaerales;D_4__Lenti-2;D_5__uncultured organism;D_6__uncultured organism	0	0	0	0	0	0	2	0	0	0	0	0	0	0	0	0	0	0	0	0
0b2304c5c47af85edc279fb2a4d3a67b	otu408	D_0__Bacteria	0	0	0	0	0	0	0	0	0	0	0	0	1	0	0	0	0	0	0	0
0b2bc90716f53396cb7be7ab78341271	otu409	D_0__Bacteria	0	0	0	0	0	0	0	0	0	0	0	0	0	0	0	0	0	4	0	0
0b3dd40336407f32d45226cd8545e6df	otu411	D_0__Bacteria	0	0	0	0	0	0	0	0	0	0	0	0	0	0	0	0	0	0	0	17
0b3f86bf4e0ab9c0285cf602dc3328b0	otu412	D_0__Archaea;D_1__Nanoarchaeaeota;D_2__Woesearchaeia	16	6	0	0	0	0	0	0	0	0	0	0	0	0	0	0	0	0	0	0
0b4328b2e0cb67e8ec25acfdd42ba3db	otu413	D_0__Bacteria;D_1__Planctomycetes;D_2__Planctomycetacia;D_3__Pirellulales;D_4__Pirellulaceae;D_5__uncultured;D_6__uncultured bacterium	5	0	0	0	0	0	0	0	0	0	0	0	0	0	0	0	0	0	0	0
0b4ad2301fa3ad9310d55b9e8805fb85	otu415	D_0__Bacteria	0	0	0	0	0	0	0	0	0	0	0	0	0	0	0	0	0	0	0	4
0b61bc1f385c7178e411d5374c34586f	otu416	D_0__Bacteria	0	0	0	0	0	4	0	0	0	0	0	0	0	0	0	0	0	0	0	0
0b6b5d86806f0e2bbc6f58946431d4ae	otu417	D_0__Archaea;D_1__Nanoarchaeaeota;D_2__Woesearchaeia	6	0	0	0	0	0	0	8	0	0	0	0	0	0	0	0	0	0	0	0
0b6c9c73468d9e6190c4e7cef5cd6ef4	otu418	D_0__Bacteria;D_1__Halanaerobiaeota;D_2__Halanaerobiia;D_3__Halanaerobiales;D_4__Halanaerobiaceae;D_5__Halanaerobium;D_6__uncultured Firmicutes bacterium	25	9	10	0	0	0	0	0	41	0	30	27	40	20	56	0	1	42	0	36
0b6cff5d7a6e231302b289c204f2ee13	otu419	D_0__Bacteria	0	0	0	0	0	0	0	0	0	0	0	0	0	0	0	0	0	0	1	0
0b754ac1b38e05d9d521b49aa5093e19	otu420	D_0__Bacteria;D_1__Firmicutes;D_2__Clostridia;D_3__Clostridiales;D_4__Syntrophomonadaceae;D_5__uncultured;	0	0	0	0	0	5	0	0	0	6	5	0	0	0	0	0	0	0	0	0
0b77f72002ed959479c69e6478b11b9c	otu421	D_0__Bacteria	0	6	0	0	0	0	0	0	0	0	0	0	0	0	0	0	0	0	0	0
0b8333293f98dc096554e8358b423e9d	otu422	D_0__Archaea;D_1__Euryarchaeota;D_2__Halobacteria;D_3__Halobacteriales;D_4__Haloferacaceae	0	9	0	0	3	0	14	0	31	54	42	12	33	0	29	37	387	406	656	524
0b8d0b0ef7d09ae8e9de0044eae7598d	otu423	D_0__Bacteria;D_1__Kiritimatiellaeota;D_2__Kiritimatiellae;D_3__WCHB1-41	0	3	0	0	4	0	0	0	11	0	0	0	0	0	0	0	0	0	0	0
0b92d00a94dccb603cfc7748feceff25	otu424	D_0__Archaea;D_1__Nanoarchaeaeota;D_2__Woesearchaeia	0	0	0	0	0	0	0	5	0	0	0	4	5	112	45	0	0	0	0	0
0b93edad6a1532c4449b8b0a3d5d1314	otu425	D_0__Bacteria	0	0	0	0	0	3	0	0	10	0	0	20	0	0	0	0	0	0	0	0
0b93fff34e61715198df8ebdbf817af1	otu426	D_0__Bacteria	0	0	0	0	0	4	0	0	0	0	0	0	0	0	0	0	0	0	0	0
0ba0257b1079bc29dec40225a1765aab	otu427	D_0__Bacteria;D_1__Proteobacteria;D_2__Gammaproteobacteria;D_3__Oceanospirillales;D_4__Halomonadaceae;D_5__Halomonas;	0	0	0	0	0	0	0	0	0	0	0	0	0	0	0	0	0	5	0	0
0ba053b7662174899d4dc8285d8a4e59	otu428	D_0__Bacteria	0	0	0	0	0	0	0	0	0	0	0	0	6	0	0	0	0	0	0	0
0ba3631616e9f9cc792961a82fadd1c0	otu429	D_0__Archaea;D_1__Nanoarchaeaeota;D_2__Woesearchaeia;D_3__uncultured archaeon;D_4__uncultured archaeon;D_5__uncultured archaeon;D_6__uncultured archaeon	0	0	0	91	0	0	0	7	0	0	0	0	0	0	0	0	0	0	0	0
0ba6d4ce915c596805359b25fdc87ed6	otu430	D_0__Bacteria;D_1__Firmicutes;D_2__Clostridia;D_3__Clostridiales;D_4__Family XI;D_5__Anaerosalibacter;	0	9	5	16	17	0	0	0	0	0	0	0	0	0	0	15	0	0	0	0
0bac01ede0117b9d8c955e00626d9973	otu431	D_0__Bacteria;D_1__Bacteroidetes;D_2__Bacteroidia;D_3__Cytophagales;D_4__Cyclobacteriaceae;D_5__Indibacter;D_6__Cyclobacterium sp. 254	0	0	0	0	0	0	0	0	0	0	0	0	0	3	0	0	0	0	0	0
0bacf62fc8ee305f5cb36075957b932f	otu432	D_0__Archaea;D_1__Nanoarchaeaeota;D_2__Woesearchaeia	1	0	15	0	20	0	13	10	0	0	0	3	0	0	0	0	0	0	0	0
0baebf710b09dea7ec5b58fb73f3200a	otu433	D_0__Archaea;D_1__Euryarchaeota;D_2__Halobacteria;D_3__Halobacteriales;D_4__Haloferacaceae;D_5__Halorubrum;	12	0	0	3	8	13	0	0	455	6	113	74	1193	253	1203	0	143	229	346	134
0bb3a7843e21f8926dd01f8e5bb58caa	otu434	D_0__Bacteria;D_1__Cloacimonetes;D_2__Cloacimonadia;D_3__Cloacimonadales;D_4__MSBL8;D_5__uncultured bacterium;D_6__uncultured bacterium	0	16	0	26	0	0	0	0	0	0	0	0	0	0	0	0	0	0	0	0
0bb6c15babb30c12ca086f6f670a4862	otu435	D_0__Bacteria	0	0	0	0	0	0	0	0	0	0	0	0	0	0	6	0	0	0	0	0
0bb9e9ab8f37fa129d915cab7cf65b6d	otu436	D_0__Bacteria	0	0	0	0	0	0	0	0	0	0	0	15	0	0	0	0	0	0	0	0
0bbf70d606d1e2c13451604be7cd3136	otu437	D_0__Bacteria;D_1__Planctomycetes;D_2__Planctomycetacia;D_3__Pirellulales;D_4__Pirellulaceae;D_5__Rhodopirellula;D_6__uncultured organism	0	0	0	0	0	0	0	0	0	0	0	0	0	147	0	0	0	0	0	0
0bc7ee8ab3ccc8a2b5f7effe4265db89	otu438	D_0__Archaea;D_1__Crenarchaeota;D_2__Bathyarchaeia;D_3__uncultured archaeon;D_4__uncultured archaeon;D_5__uncultured archaeon;D_6__uncultured archaeon	0	0	0	0	0	2	0	0	0	0	0	0	0	0	0	0	0	0	0	0
0bcd5ed2cb324b9829924f982a47b0b8	otu439	D_0__Bacteria	0	0	0	0	0	0	0	0	0	0	0	0	0	0	0	0	0	0	26	0
0bd4a0fcf3e71a75a91880c7808ee9e5	otu440	D_0__Bacteria;D_1__Verrucomicrobia;D_2__Verrucomicrobiae;D_3__Pedosphaerales;D_4__Pedosphaeraceae;D_5__uncultured bacterium;D_6__uncultured bacterium	0	0	0	0	0	0	4	0	0	0	0	0	0	0	0	0	0	0	0	0
0bd555d345a86094538e484cca75db8c	otu441	D_0__Bacteria	0	0	0	0	6	0	0	0	0	0	0	0	0	0	0	0	0	0	0	0
0be6aa4480f85ea8292b1b750861cfc7	otu442	D_0__Bacteria;D_1__Omnitrophicaeota;D_2__uncultured bacterium;D_3__uncultured bacterium;D_4__uncultured bacterium;D_5__uncultured bacterium;D_6__uncultured bacterium	0	0	0	0	0	0	2	0	0	0	0	0	0	0	0	10	0	0	0	0
0be7040eefdbc42b9050f94f26daaa4e	otu443	D_0__Archaea;D_1__Euryarchaeota;D_2__Halobacteria;D_3__Halobacteriales;D_4__Haloferacaceae;D_5__Natronorubrum;D_6__Natronorubrum tibetense	114	195	104	0	0	0	0	61	0	0	0	8	0	0	0	0	0	0	0	0
0bf0ed78124656c87194d7793d66d40f	otu444	D_0__Bacteria;D_1__Halanaerobiaeota;D_2__Halanaerobiia;D_3__Halanaerobiales;D_4__Halobacteroidaceae;D_5__uncultured;D_6__uncultured bacterium	0	0	0	0	0	0	0	2	0	0	0	0	0	0	0	0	0	0	0	0
0bf1ab11bd03f91191950bf6bfee2194	otu445	D_0__Bacteria;D_1__Planctomycetes;D_2__OM19	60	129	205	687	582	17	98	16	0	0	22	0	15	0	22	10	14	0	0	27
0bf72d88e54de817268c83412eee355d	otu446	D_0__Bacteria;D_1__Proteobacteria;D_2__Gammaproteobacteria;D_3__Oceanospirillales	0	0	0	0	1	0	0	0	0	0	0	0	0	0	0	0	0	0	0	0
0bfa4d7037090179cd4bea7eda53b0b3	otu447	D_0__Bacteria;D_1__Planctomycetes;D_2__Planctomycetacia;D_3__Pirellulales;D_4__Pirellulaceae;D_5__uncultured;D_6__uncultured bacterium	45	94	41	165	37	0	0	0	0	0	0	0	0	0	0	0	0	0	0	0
0bfcb7d05b64dd72e7f235db5b065b57	otu448	D_0__Bacteria;D_1__Verrucomicrobia;D_2__Verrucomicrobiae;D_3__Chthoniobacterales;D_4__Chthoniobacteraceae;D_5__Candidatus Udaeobacter;	0	0	0	0	0	0	0	0	0	0	0	0	3	0	0	0	0	0	0	0
0bfce5f6aff68817e384e45ac1e6a258	otu449	D_0__Bacteria;D_1__Planctomycetes;D_2__OM19	0	39	29	0	30	0	0	0	0	0	0	5	0	0	0	34	0	0	0	0
0bfd6ae8206434754b190c953f3cbdd8	otu450	D_0__Bacteria	0	0	0	0	0	0	0	0	2	0	0	0	0	0	0	0	0	0	0	0
0c1089e76d3e110efed93cb4ae67123e	otu451	D_0__Bacteria	0	0	0	0	4	0	0	0	0	0	0	0	0	0	0	0	0	0	0	0
0c118dfc63e9ebe798eea40ffce61786	otu452	D_0__Bacteria	0	0	0	0	0	0	0	0	0	0	0	4	0	0	0	0	0	0	0	0
0c14aa2a08e944cbcaa7e8d886e7ca86	otu453	D_0__Bacteria	0	0	0	0	0	0	0	0	0	0	0	0	0	0	0	0	0	1	0	0
0c23f033e0e793dbe12d5f1096eaba3e	otu454	D_0__Bacteria	0	0	0	0	0	0	0	0	0	0	0	3	0	0	0	0	0	0	0	0
0c29686d61965d4f5a7db9629808fd53	otu455	D_0__Archaea;D_1__Crenarchaeota;D_2__Bathyarchaeia;D_3__unidentified archaeon;D_4__unidentified archaeon;D_5__unidentified archaeon;D_6__unidentified archaeon	0	12	0	6	7	11	4	0	8	0	0	6	0	0	0	0	0	0	0	0
0c2b3f10c46a72f255e6011946316afb	otu456	D_0__Archaea;D_1__Nanoarchaeaeota;D_2__Woesearchaeia	0	0	0	0	0	8	0	0	0	40	69	0	15	0	0	0	0	0	0	0
0c37c764b371f51a3b95a23ca2215a38	otu457	D_0__Bacteria	0	0	0	0	0	0	0	0	0	0	0	0	0	9	0	0	0	0	0	0
0c3b45b51550963e5e5b41af97667e23	otu458	D_0__Bacteria	0	0	0	0	0	5	0	0	0	0	0	0	0	0	0	0	0	0	0	0
0c41371782e0c629e5a59326c00120db	otu459	D_0__Bacteria;D_1__Proteobacteria;D_2__Alphaproteobacteria;D_3__Caulobacterales;D_4__Hyphomonadaceae;D_5__Hyphobacterium;D_6__uncultured bacterium	0	0	0	0	0	0	2	0	0	0	0	0	0	0	0	0	0	0	0	0
0c4517bf33b6e0a662c6f0eb76045819	otu460	D_0__Archaea;D_1__Euryarchaeota;D_2__Halobacteria;D_3__Halobacteriales;D_4__Haloferacaceae;D_5__Natronoarchaeum;D_6__uncultured archaeon	10	0	0	0	0	0	0	0	0	0	0	0	0	0	0	0	0	0	0	0
0c4abdc18ea0c1b9a1449dcbbaaac78c	otu461	D_0__Bacteria;D_1__Proteobacteria;D_2__Alphaproteobacteria;D_3__Rhodobacterales;D_4__Rhodobacteraceae;D_5__Roseovarius;	0	0	0	0	1	0	0	0	0	0	0	0	0	0	0	0	0	0	0	0
0c58a6239bbef060380740caa8b83bd8	otu462	D_0__Bacteria	0	0	0	0	0	0	0	0	0	0	0	0	2	0	0	0	0	0	0	0
0c5bbc7608f7401461722f478b84d822	otu463	D_0__Bacteria	0	0	0	0	0	0	0	0	0	0	7	0	0	0	0	0	0	0	0	0
0c5c8a481b46beafd599c08bae1614bb	otu464	D_0__Bacteria	0	0	0	0	0	3	0	0	0	0	0	0	0	0	0	0	0	0	0	0
0c628c6a2208b8fb740354beaf9777da	otu465	D_0__Bacteria;D_1__Patescibacteria;D_2__Parcubacteria;D_3__Paceibacterales;D_4__Paceibacteraceae;D_5__Candidatus Paceibacter;D_6__uncultured bacterium	93	126	173	300	82	0	24	35	0	0	0	0	0	0	0	0	0	0	0	0
0c657b774636d76aa038cce1bd26f734	otu466	D_0__Bacteria;D_1__Verrucomicrobia;D_2__Verrucomicrobiae;D_3__Chthoniobacterales;D_4__Terrimicrobiaceae;D_5__Terrimicrobium;	0	0	3	0	0	0	0	0	0	0	0	0	0	0	0	0	0	0	0	0
0c7369149fffbf9cbba3e17155204916	otu467	D_0__Bacteria;D_1__Actinobacteria;D_2__Rubrobacteria;D_3__Rubrobacterales;D_4__Rubrobacteriaceae;D_5__Rubrobacter;D_6__uncultured actinobacterium	0	0	0	0	5	0	0	0	0	0	0	0	0	0	0	0	0	0	0	0
0c74dfa29ef789c0a10e21f7c43749dc	otu468	D_0__Bacteria	0	0	0	0	0	0	0	0	0	0	0	0	0	9	0	0	0	0	0	0
0c750d466bdb45021766527b49dde723	otu469	D_0__Bacteria	0	0	0	0	0	0	0	0	0	0	1	0	0	0	0	0	0	0	0	0
0c7550a41eb29aa0bb2bb8f8e9ce8599	otu470	D_0__Archaea;D_1__Nanoarchaeaeota;D_2__Woesearchaeia	0	0	0	0	3	0	0	0	0	0	0	0	0	0	0	0	0	0	0	0
0c7e51c5a859a906c66a24814a36ab7f	otu471	D_0__Bacteria	2	0	0	0	5	0	0	0	0	0	0	0	0	0	0	0	0	0	0	0
0c86b1d854afc2cdbf937a99fbd96976	otu472	D_0__Bacteria	0	0	3	0	0	0	0	0	0	0	0	0	0	0	0	0	0	0	0	0
0c882fea587a10b335294f7c1993b10b	otu473	D_0__Archaea;D_1__Diapherotrites;D_2__Iainarchaeia;D_3__uncultured archaeon;D_4__uncultured archaeon;D_5__uncultured archaeon;D_6__uncultured archaeon	0	0	0	0	0	0	0	0	8	0	0	0	4	0	11	0	0	0	0	0
0c9cdff756dd7873921e89fcfe2c89f8	otu474	D_0__Bacteria	3	0	0	0	0	0	0	0	0	0	0	0	0	0	0	0	0	0	0	0
0ca61b04ca4132f65e4f7fb40161b382	otu475	D_0__Bacteria	0	0	114	0	106	0	83	0	0	41	127	0	0	0	0	0	0	0	0	0
0cab0031a9dd5451018823149122febb	otu476	D_0__Bacteria;D_1__Halanaerobiaeota;D_2__Halanaerobiia;D_3__Halanaerobiales;D_4__Halobacteroidaceae;D_5__Halonatronum;D_6__Halonatronum saccharophilum DSM 13868	0	0	0	0	0	0	0	0	0	0	0	0	0	3	0	0	0	0	0	0
0cada1022ecf49aeeefe7c7af534596e	otu477	D_0__Archaea;D_1__Nanoarchaeaeota;D_2__Woesearchaeia;D_3__uncultured euryarchaeote;D_4__uncultured euryarchaeote;D_5__uncultured euryarchaeote;D_6__uncultured euryarchaeote	0	0	0	0	0	3	0	0	0	0	0	0	0	0	0	0	0	0	0	0
0cadbd4a98db7520780d1b6ea412701e	otu478	D_0__Bacteria	0	0	0	0	0	0	0	0	0	0	0	0	0	0	0	7	0	0	0	0
0cb1a62726f77ba2233624b15a95f18c	otu479	D_0__Bacteria	0	0	0	0	0	0	0	0	0	0	0	8	0	0	0	0	0	0	0	0
0cb24a6ce16de8f9b841e806dc3365b2	otu480	D_0__Bacteria;D_1__Omnitrophicaeota;D_2__uncultured Omnitrophica bacterium;D_3__uncultured Omnitrophica bacterium;D_4__uncultured Omnitrophica bacterium;D_5__uncultured Omnitrophica bacterium;D_6__uncultured Omnitrophica bacterium	57	20	67	55	0	12	0	30	0	0	0	0	63	0	72	0	0	0	0	0
0ccecf91b2b3236504cbb611f2b3507a	otu481	D_0__Bacteria	11	0	0	0	0	0	0	0	0	0	0	0	0	0	0	0	0	0	0	0
0cdc97bbbe739a343220c088c9b6e2fd	otu482	D_0__Bacteria;D_1__Firmicutes;D_2__Clostridia;D_3__Clostridiales;D_4__Syntrophomonadaceae	0	0	0	0	0	0	0	0	0	0	0	0	0	0	0	0	0	20	12	12
0ceac28c7eb3f81a2236183bdb567c3d	otu483	D_0__Archaea;D_1__Nanoarchaeaeota;D_2__Woesearchaeia	0	71	10	6	0	0	0	0	0	0	0	0	0	0	0	0	0	0	0	0
0ceb6fe72493ff862b8a899eb4c0cb19	otu484	D_0__Bacteria;D_1__Halanaerobiaeota;D_2__Halanaerobiia;D_3__Halanaerobiales;D_4__Halanaerobiaceae;D_5__Halanaerobium;D_6__uncultured Firmicutes bacterium	0	0	0	0	0	0	0	0	0	0	0	0	0	0	0	4	0	0	0	0
0cef4d090cd73c00733a83bff4de563b	otu485	D_0__Bacteria	0	0	0	0	0	0	0	0	0	0	0	0	3	0	0	0	0	0	0	0
0cf1fd355ae7230fbf1915bc2d9740c2	otu486	D_0__Bacteria;D_1__Planctomycetes;D_2__Phycisphaerae;D_3__Phycisphaerales;D_4__AKAU3564 sediment group;D_5__uncultured organism;D_6__uncultured organism	0	0	0	0	0	0	0	4	0	0	0	0	0	0	0	0	0	0	0	0
0cf2705bfdc85700bff0e7f6d655f84a	otu487	D_0__Bacteria	0	1	0	0	0	0	0	0	0	0	0	0	0	0	0	0	0	0	0	0
0cf4ee4844f6cb7a836c6b0ebb2676d5	otu488	D_0__Bacteria	0	0	3	0	0	3	6	0	0	0	0	0	0	0	0	0	0	0	0	0
0cf6840ef981473f070882eefd37b9bf	otu489	D_0__Bacteria	0	0	0	0	0	0	0	0	0	0	0	0	0	0	0	0	0	15	0	3
0cfe33d6492a218440706e26f3cefa82	otu490	D_0__Archaea;D_1__Nanoarchaeaeota;D_2__Woesearchaeia	0	0	0	0	0	0	0	0	0	37	5	20	0	0	0	0	0	0	0	0
0d0beb21eed7eb81940763c0fa7e7fd4	otu491	D_0__Bacteria	0	0	0	0	0	0	0	0	0	0	0	0	0	0	0	0	0	30	0	0
0d0fdec9cabdc9793b6f2f2480a1b41d	otu492	D_0__Bacteria	0	0	0	0	0	0	0	0	0	0	0	0	0	0	0	0	0	0	0	101
0d1151a6dbc4eb3e185e8d22603baca9	otu493	D_0__Archaea;D_1__Nanoarchaeaeota;D_2__Woesearchaeia;D_3__uncultured euryarchaeote;D_4__uncultured euryarchaeote;D_5__uncultured euryarchaeote;D_6__uncultured euryarchaeote	0	0	0	0	0	0	4	0	0	0	0	0	0	0	0	0	0	0	0	0
0d115b530c232d658bbe12facae92f65	otu494	D_0__Bacteria	0	0	0	0	0	2	0	0	0	0	0	0	0	0	0	0	0	0	0	0
0d125c162d02f04eefde8389500169ad	otu495	D_0__Archaea;D_1__Nanoarchaeaeota;D_2__Woesearchaeia;D_3__uncultured archaeon;D_4__uncultured archaeon;D_5__uncultured archaeon;D_6__uncultured archaeon	0	0	0	0	0	0	0	0	0	12	0	0	0	0	0	0	0	0	0	0
0d128d4935971f7679aad4c5aaa70270	otu496	D_0__Bacteria	0	0	0	0	0	0	0	0	0	0	0	0	2	0	0	0	0	0	0	0
0d140a76104db0b926d863dbdd55302a	otu497	D_0__Bacteria	0	2	0	0	0	0	0	0	0	0	0	0	0	0	0	0	0	0	0	0
0d149eb898a2fcba6a1dffcd163d1abf	otu498	D_0__Bacteria	0	0	0	0	0	0	0	0	0	0	0	5	0	0	0	0	0	0	0	0
0d19e52a2eedda51d67abacf0eca2b37	otu499	D_0__Bacteria	0	0	0	0	0	0	0	0	0	0	0	0	0	0	0	0	0	3	0	0
0d2813e692f8bb5d9b70353257f76d8b	otu500	D_0__Bacteria	0	0	2	6	0	0	0	0	10	0	0	0	0	0	0	0	0	0	0	0
0d2e46d24ab5d6c8017a08c5b47ebf04	otu501	D_0__Archaea;D_1__Euryarchaeota;D_2__Halobacteria;D_3__Halobacteriales;D_4__Haloferacaceae;D_5__uncultured;D_6__uncultured haloarchaeon	33	11	19	28	3	14	7	23	1	0	0	5	0	14	0	3	0	28	12	29
0d35f9a496e39f805529250e0f51653e	otu502	D_0__Bacteria	0	2	0	0	0	0	0	0	0	0	0	0	0	0	0	0	0	0	0	0
0d3666d2e0851f7eeaccd97bf328bb8b	otu503	D_0__Bacteria	0	0	0	0	0	0	0	0	0	0	0	5	0	0	0	0	0	0	0	0
0d48befca82c8e2b9ec219fda8b2fbdf	otu504	D_0__Bacteria;D_1__Patescibacteria;D_2__Parcubacteria;D_3__Candidatus Yanofskybacteria	0	0	0	0	0	0	0	0	0	0	1	0	0	0	0	0	0	0	0	0
0d4adaeb714f248f2fb59c8c7ab8475d	otu505	D_0__Bacteria	0	0	0	0	0	0	0	0	0	0	0	0	0	0	0	0	0	8	0	0
0d4b2b3f1ce0ae8778f726ae349b1875	otu506	D_0__Bacteria;D_1__Firmicutes	0	0	0	0	0	0	0	0	0	0	0	0	0	0	0	0	0	7	0	0
0d503cc3b7a63a265132d0bbb69e3a8c	otu507	D_0__Archaea;D_1__Nanoarchaeaeota;D_2__Woesearchaeia;D_3__uncultured euryarchaeote;D_4__uncultured euryarchaeote;D_5__uncultured euryarchaeote;D_6__uncultured euryarchaeote	0	0	0	1	0	0	0	0	0	0	0	0	0	0	0	0	0	0	0	0
0d513c69bfe321d6e5fbb785f5a074fc	otu508	D_0__Bacteria	0	0	0	0	0	0	0	0	0	0	0	0	0	0	0	0	0	3	0	0
0d673b80aa8c44d79678350d9f93b342	otu509	D_0__Bacteria	5	0	0	0	0	0	0	0	0	0	0	0	0	0	0	0	0	0	0	0
0d74f5dad8d5254fa6cc6b8e37cef262	otu510	D_0__Bacteria	0	0	0	0	0	0	0	0	0	0	0	0	4	0	0	0	0	0	0	0
0d7dcd861848ebed069e2d3a13d35a73	otu512	D_0__Bacteria;D_1__Firmicutes;D_2__Clostridia	7	0	8	0	6	5	0	0	7	0	0	0	0	0	0	0	16	0	9	0
0d7fb33a5a9760f31b4aa26b4a9ef648	otu513	D_0__Bacteria;D_1__Proteobacteria;D_2__Gammaproteobacteria;D_3__Oceanospirillales;D_4__Nitrincolaceae;D_5__Balneatrix;D_6__Gammaproteobacteria bacterium	0	0	6	0	0	13	15	0	1	8	5	0	0	0	0	0	0	0	0	0
0d82d0c8031c6e1adc3ebeff1fd99bc2	otu514	D_0__Archaea;D_1__Euryarchaeota;D_2__Halobacteria;D_3__Halobacteriales;D_4__Haloferacaceae;D_5__Halorubrum;	0	0	0	0	0	0	0	0	0	0	13	17	88	86	107	0	89	76	155	41
0d8e7f81b54c34fd3d6f00353c9b9b57	otu515	D_0__Bacteria;D_1__Verrucomicrobia;D_2__Verrucomicrobiae;D_3__Pedosphaerales;D_4__Pedosphaeraceae	0	5	0	0	0	0	0	0	0	0	0	0	0	0	0	0	0	0	0	0
0d9081914c3b790c30c01d45891be956	otu516	D_0__Bacteria	0	0	0	0	0	0	0	0	0	0	0	0	0	0	6	0	0	0	0	0
0d9a96e4060ec7b6af736baaec3c7bd6	otu517	D_0__Bacteria	0	0	0	0	0	2	5	0	0	0	0	0	0	0	0	0	0	0	0	0
0d9edb887fbf7e3cd35fecf9a0cb0588	otu519	D_0__Archaea;D_1__Nanoarchaeaeota;D_2__Woesearchaeia	0	0	0	0	0	0	0	0	0	0	0	0	0	0	1	0	0	0	0	0
0da1ee2bc6b373abc493d5e93bab58ab	otu520	D_0__Bacteria	0	0	0	0	0	0	0	0	0	0	0	3	0	0	0	0	0	0	0	0
0da25baeceb0bd8bf18842af4fb19992	otu521	D_0__Bacteria;D_1__Chloroflexi;D_2__Anaerolineae;D_3__RBG-13-54-9	0	0	0	4	0	0	0	0	0	0	0	0	0	0	0	0	0	0	0	0
0da3d2a48e66ae51dac631a5429cef3c	otu522	D_0__Bacteria	0	0	0	0	0	0	0	0	0	0	0	0	0	0	0	1	0	0	0	0
0db9c1a89a38e773a16445d2db661146	otu523	D_0__Bacteria	0	0	0	0	4	0	0	0	0	0	0	0	0	0	0	0	0	0	0	0
0dbf691e96a370b2cdb3c6b7829a7c88	otu524	D_0__Archaea;D_1__Euryarchaeota;D_2__Halobacteria;D_3__Halobacteriales;D_4__uncultured;D_5__uncultured haloarchaeon;D_6__uncultured haloarchaeon	9	0	23	0	0	0	14	0	0	0	0	0	0	0	0	0	0	0	0	0
0dc1c4cab3d56cfbb52b000e7dfa0d3b	otu525	D_0__Bacteria	0	0	0	0	0	0	0	0	0	0	0	0	0	0	2	0	0	0	0	0
0dc70a52167d13f94b5c524342b59df4	otu526	D_0__Bacteria;D_1__Planctomycetes;D_2__Planctomycetacia;D_3__Isosphaerales;D_4__Isosphaeraceae;D_5__uncultured;D_6__uncultured endolithic bacterium	0	0	0	0	0	0	0	0	0	0	0	2	0	0	0	0	0	0	0	0
0dc9cddd3c7df5a20a5d869208734836	otu527	D_0__Bacteria	0	0	0	0	0	0	3	0	0	0	0	0	0	0	0	0	0	0	0	0
0dcfb15039006f87804e532a9b3f0810	otu528	D_0__Archaea;D_1__Euryarchaeota;D_2__Halobacteria;D_3__Halobacteriales;D_4__Haloferacaceae;D_5__Haloparvum;D_6__uncultured haloarchaeon	0	0	0	0	0	0	0	0	0	0	0	0	0	0	0	0	64	0	36	55
0dd1b6820d50f80618b2d6d476128d45	otu529	D_0__Bacteria	0	0	0	0	0	0	0	0	0	0	0	0	0	0	0	0	0	0	5	0
0ddc292ab7cee50b140a49a7fe9e2541	otu530	D_0__Bacteria	0	0	0	2	0	0	0	0	0	0	0	0	0	0	0	0	0	0	0	0
0de32f19d568f6b1bc6381c1b6105168	otu531	D_0__Archaea;D_1__Euryarchaeota;D_2__Thermoplasmata;D_3__uncultured;D_4__uncultured archeon 'KTK 4A';D_5__uncultured archeon 'KTK 4A';D_6__uncultured archeon 'KTK 4A'	7	12	42	3	6	177	95	36	144	147	73	1091	255	535	261	13	27	110	85	86
0de3b41a9ef6f80b4b326928306e8af1	otu532	D_0__Bacteria	0	0	0	0	0	0	0	0	0	0	0	0	0	0	0	0	0	0	4	0
0de5e8929fb59d8e386bb056ce1fb57a	otu533	D_0__Archaea;D_1__Euryarchaeota;D_2__Halobacteria;D_3__Halobacteriales;D_4__uncultured;D_5__uncultured haloarchaeon;D_6__uncultured haloarchaeon	0	0	0	0	0	0	1	0	0	0	0	0	10	0	0	0	0	0	4	0
0df8a9b9308d3743b19c797cc853e166	otu534	D_0__Archaea;D_1__Nanoarchaeaeota;D_2__Woesearchaeia	0	0	0	0	0	0	0	0	0	0	0	0	0	0	0	90	0	0	0	0
0e09bcf2f70ecb2756574bfc5107c85c	otu535	D_0__Bacteria	0	0	0	0	0	2	0	0	0	0	0	0	0	0	0	0	0	0	0	0
0e0c008ca40f5c562abefae77f5b5642	otu536	D_0__Bacteria	0	0	0	0	0	0	0	0	0	0	0	0	0	0	0	0	0	3	0	0
0e19b5d1decf37844ab54a6d884a96a2	otu537	D_0__Bacteria;D_1__Proteobacteria;D_2__Deltaproteobacteria	0	0	0	0	0	0	0	0	0	0	0	0	0	0	0	0	0	0	12	0
0e25665ab568d22f1a7b8a3d1d4720dd	otu538	D_0__Bacteria;D_1__Patescibacteria;D_2__Parcubacteria;D_3__Candidatus Yanofskybacteria;D_4__uncultured bacterium;D_5__uncultured bacterium;D_6__uncultured bacterium	0	0	9	0	0	0	0	0	0	0	0	0	0	0	0	0	0	0	0	0
0e2d7cca87678bbb53ba12e223aa6a58	otu539	D_0__Bacteria;D_1__Patescibacteria;D_2__Parcubacteria;D_3__uncultured bacterium;D_4__uncultured bacterium;D_5__uncultured bacterium;D_6__uncultured bacterium	28	57	56	27	26	30	28	49	25	94	77	10	9	0	0	0	0	0	0	0
0e36a218e0a0cf103cd9bff0376bd10c	otu540	D_0__Archaea;D_1__Euryarchaeota;D_2__Thermoplasmata;D_3__uncultured;D_4__uncultured archaeon;D_5__uncultured archaeon;D_6__uncultured archaeon	0	0	0	0	0	0	0	0	0	0	0	0	0	0	0	7	0	0	0	0
0e3c52a21e246994d8af63a7086395dc	otu541	D_0__Bacteria	0	0	0	0	0	0	3	2	0	0	0	0	0	0	0	0	0	0	0	0
0e3cfd65eb060825a5668870ec030fb8	otu542	D_0__Bacteria	0	0	0	0	0	7	0	0	0	0	0	0	0	0	0	0	0	0	0	0
0e54501edaaef38aeb2a79c5a2cb649f	otu543	D_0__Bacteria	0	0	0	0	0	0	0	0	3	0	0	0	0	0	0	0	0	0	0	0
0e55735279ef96af650577abf9b80673	otu544	D_0__Bacteria;D_1__Bacteroidetes;D_2__Bacteroidia;D_3__Bacteroidales;D_4__Bacteroidaceae;D_5__Bacteroides;	0	0	0	0	0	0	0	0	0	0	0	0	0	0	0	3	0	0	0	0
0e7faca8cc0939146fdd045672ca582e	otu545	D_0__Bacteria;D_1__Actinobacteria;D_2__WCHB1-81;D_3__uncultured bacterium;D_4__uncultured bacterium;D_5__uncultured bacterium;D_6__uncultured bacterium	0	0	0	0	0	9	0	0	0	0	0	0	0	0	0	0	0	0	0	0
0e80648c8324ee0c13a88a00b77db1e6	otu546	D_0__Bacteria	0	0	0	0	0	0	0	0	0	0	0	2	0	0	0	0	0	0	0	0
0e85758601377828334b355ec061a6ed	otu547	D_0__Bacteria	0	0	1	0	0	0	0	0	0	0	0	0	0	0	0	0	0	0	0	0
0e873b2b87024f5e5fc09f21d031aff2	otu548	D_0__Bacteria	0	0	0	0	0	0	0	0	0	0	0	0	0	6	0	0	0	0	0	0
0e8c4a58951bc93db06442f0de9f4988	otu549	D_0__Bacteria;D_1__Omnitrophicaeota;D_2__Candidatus Omnitrophus magneticus;D_3__Candidatus Omnitrophus magneticus;D_4__Candidatus Omnitrophus magneticus;D_5__Candidatus Omnitrophus magneticus;D_6__Candidatus Omnitrophus magneticus	0	116	58	175	0	0	0	0	0	0	0	0	0	0	0	0	0	0	0	0
0e9a9dccd8f018e06a09ac86ffc76cf6	otu550	D_0__Bacteria	0	0	0	8	0	0	0	0	0	0	0	0	0	0	0	0	0	0	0	0
0e9e66c08b5f6fa24bacf3de04028180	otu551	D_0__Bacteria	0	0	0	0	0	0	0	0	0	0	0	0	0	0	4	0	0	0	0	0
0eae925cdee2d9e2f92cdaf7957dac36	otu552	D_0__Archaea;D_1__Nanoarchaeaeota;D_2__Woesearchaeia;D_3__unidentified archaeon;D_4__unidentified archaeon;D_5__unidentified archaeon;D_6__unidentified archaeon	19	7	5	86	756	3	304	15	20	7	3	3	0	0	0	418	0	2	0	3
0ebc053c367b3eee74a48d3a950d3218	otu553	D_0__Archaea;D_1__Nanoarchaeaeota;D_2__Woesearchaeia	0	0	0	0	21	29	14	0	0	0	0	0	0	0	0	9	0	0	0	0
0ec7647334a5f5b965d3195b8dd75d8c	otu554	D_0__Bacteria;D_1__Verrucomicrobia;D_2__Verrucomicrobiae;D_3__Verrucomicrobiales;D_4__DEV7;D_5__uncultured bacterium;D_6__uncultured bacterium	0	0	0	0	4	0	0	0	0	0	0	0	5	0	0	0	0	0	0	0
0ec8b18ecdfbdf7702979a8728fbee46	otu555	D_0__Bacteria	4	0	0	0	0	0	0	0	0	0	0	0	0	0	0	0	0	0	0	0
0ed1b32d2dee28194a6fd1b52840ba11	otu556	D_0__Bacteria	0	51	14	30	0	0	0	0	0	0	0	0	0	0	0	0	0	0	0	0
0ed4094e6e8d49772e922122e88a5a75	otu557	D_0__Archaea;D_1__Nanoarchaeaeota;D_2__Woesearchaeia;D_3__uncultured euryarchaeote;D_4__uncultured euryarchaeote;D_5__uncultured euryarchaeote;D_6__uncultured euryarchaeote	0	0	0	0	0	0	0	0	0	0	0	4	0	0	0	0	0	0	0	0
0ee67cc2b0029e1ce94ec5967bb58348	otu558	D_0__Bacteria	0	0	0	0	0	0	0	0	0	30	0	0	0	0	0	0	0	0	0	0
0ef2b25b128914cb4df1f02392152f30	otu559	D_0__Bacteria;D_1__Omnitrophicaeota	0	1	0	0	0	0	0	0	0	0	0	0	0	0	0	0	0	0	0	0
0eff9c2c60b91d1ac4e4a30343b49db3	otu560	D_0__Bacteria	0	0	0	0	0	0	0	0	0	0	0	0	0	0	0	4	0	0	0	0
0f075c020693ff5e5dc286b124878207	otu561	D_0__Bacteria;D_1__Actinobacteria;D_2__Nitriliruptoria;D_3__Nitriliruptorales;D_4__Nitriliruptoraceae;D_5__uncultured bacterium;D_6__uncultured bacterium	0	0	0	0	0	0	0	0	0	0	0	0	0	0	0	0	0	0	7	0
0f0f95fc10b300cc5740ddd2c7bb8f21	otu562	D_0__Bacteria;D_1__Patescibacteria;D_2__Parcubacteria;D_3__Candidatus Kaiserbacteria;D_4__uncultured bacterium;D_5__uncultured bacterium;D_6__uncultured bacterium	0	0	0	0	1	0	0	0	0	0	0	0	0	0	0	0	0	0	0	0
0f1c3d3ab219c0828bdbd00f795f1b88	otu563	D_0__Archaea;D_1__Nanoarchaeaeota;D_2__Woesearchaeia	0	0	0	0	0	0	0	5	0	0	0	11	0	3	0	0	0	14	6	1
0f1dc3eb94250d0cf3de1315f7335c2f	otu564	D_0__Bacteria;D_1__Planctomycetes;D_2__Planctomycetacia;D_3__Pirellulales;D_4__Pirellulaceae;D_5__Pirellula;D_6__uncultured bacterium	0	4	0	0	0	0	0	0	0	0	0	0	0	0	0	0	0	0	0	0
0f22f628a42da5d28ef74be721187e6f	otu565	D_0__Bacteria;D_1__Kiritimatiellaeota;D_2__Kiritimatiellae;D_3__WCHB1-41	0	0	0	0	0	0	5	0	0	0	0	0	0	0	0	0	0	0	0	0
0f24d8fc7f863c1774c1eeb7c7a4b147	otu566	D_0__Bacteria	0	0	0	0	0	0	0	0	0	7	0	0	5	3	0	0	0	0	0	0
0f29228edce9b85e50b8a24eb785282e	otu567	D_0__Archaea;D_1__Euryarchaeota;D_2__Halobacteria;D_3__Halobacteriales;D_4__Haloferacaceae;D_5__uncultured;D_6__uncultured haloarchaeon	0	0	0	0	0	0	13	0	0	0	0	0	0	0	0	0	0	0	0	0
0f297efc1b5eee4157cedcfbffa1e274	otu568	D_0__Archaea;D_1__Nanoarchaeaeota;D_2__Woesearchaeia;D_3__Candidatus Staskawiczbacteria bacterium RIFOXYA2_FULL_32_7;D_4__Candidatus Staskawiczbacteria bacterium RIFOXYA2_FULL_32_7;D_5__Candidatus Staskawiczbacteria bacterium RIFOXYA2_FULL_32_7;D_6__Candidatus Staskawiczbacteria bacterium RIFOXYA2_FULL_32_7	0	0	0	2	0	0	0	0	0	0	0	0	0	0	0	0	0	0	0	0
0f309b14b4150fcb0d225504c2993a39	otu569	D_0__Bacteria	0	0	0	0	0	0	0	0	0	0	1	0	0	0	0	0	0	0	0	0
0f392aa0f343f1651e7df6be9665c0f4	otu570	D_0__Bacteria;D_1__Bacteroidetes;D_2__Bacteroidia;D_3__Bacteroidales;D_4__ML635J-4 aquatic group;D_5__uncultured Bacteroidetes bacterium;D_6__uncultured Bacteroidetes bacterium	0	0	0	0	0	0	0	0	0	2	0	0	0	0	0	0	0	0	0	0
0f4875e3871462ca2f70fd1163c438f9	otu571	D_0__Bacteria;D_1__Planctomycetes;D_2__Planctomycetacia;D_3__Isosphaerales;D_4__Isosphaeraceae;D_5__uncultured;D_6__uncultured bacterium	0	0	0	0	0	0	0	0	0	0	0	0	0	5	0	0	0	0	0	0
0f4dbabe7265b276d52b62e7dad3f7ab	otu572	D_0__Bacteria;D_1__Planctomycetes;D_2__Planctomycetacia;D_3__Isosphaerales;D_4__Isosphaeraceae;D_5__uncultured;D_6__uncultured bacterium	0	0	0	0	0	0	0	0	0	0	0	0	0	0	0	3	0	0	0	0
0f53843c015b74c8aaa232d5e5b4584c	otu573	D_0__Bacteria;D_1__Cyanobacteria;D_2__Oxyphotobacteria;D_3__Chloroplast	0	0	0	0	0	0	0	0	0	0	0	0	0	5	0	0	0	0	0	0
0f618764480728d25d5d9d72ce5f7068	otu574	D_0__Bacteria;D_1__Acidobacteria;D_2__Blastocatellia (Subgroup 4);D_3__Blastocatellales;D_4__Blastocatellaceae;D_5__Aridibacter;D_6__uncultured bacterium	0	0	0	0	0	0	0	0	0	0	0	0	0	2	0	0	0	0	0	0
0f6d2466463d8755ea6d2f391d742b65	otu575	D_0__Archaea;D_1__Nanoarchaeaeota;D_2__Woesearchaeia;D_3__uncultured euryarchaeote;D_4__uncultured euryarchaeote;D_5__uncultured euryarchaeote;D_6__uncultured euryarchaeote	0	0	8	1	0	2	0	0	0	0	0	0	0	0	0	0	0	0	0	0
0f8caf7903d20ca111e69d3593a1b56c	otu576	D_0__Bacteria	0	0	0	0	0	0	0	0	0	0	0	0	4	0	0	0	0	0	0	0
0f9c2019ca1ad3441470ed8026848f39	otu577	D_0__Bacteria;D_1__Firmicutes;D_2__Clostridia	0	0	0	0	0	0	0	0	3	0	12	0	9	11	0	0	36	20	0	19
0faf7089c80bae695d5d27ae613bd1d5	otu579	D_0__Bacteria;D_1__Cloacimonetes;D_2__Cloacimonadia;D_3__Cloacimonadales	10	9	16	0	188	0	72	9	7	0	0	0	33	0	0	65	0	0	0	0
0fbe6ee2dc63c3a0e3be8fd847a457d2	otu580	D_0__Bacteria	0	0	0	0	0	0	0	0	0	0	0	0	0	0	0	0	4	0	0	0
0fc45b37455f73e72020b1e459f2a989	otu581	D_0__Bacteria;D_1__Planctomycetes;D_2__Planctomycetacia;D_3__Pirellulales;D_4__Pirellulaceae;D_5__uncultured;D_6__uncultured bacterium	0	0	11	0	0	0	0	0	0	0	0	0	0	0	0	0	0	0	0	0
0fcd4f289e1df3256b7872f8ac83922b	otu582	D_0__Bacteria	0	0	0	0	0	0	0	0	0	0	0	0	0	0	0	0	0	0	27	0
0fce5c1843f52219e27cc79cfd23474e	otu583	D_0__Bacteria;D_1__Planctomycetes;D_2__Planctomycetacia;D_3__Pirellulales;D_4__Pirellulaceae;D_5__Bythopirellula;	0	0	0	0	15	0	0	0	0	0	0	0	0	0	0	0	0	0	0	0
0fd7d054ce8f75e0db36ce18a79f1012	otu584	D_0__Bacteria	0	3	0	0	0	0	0	0	0	0	0	0	0	0	0	0	0	0	0	0
0fdbba8f80e021dea7b31a943e486a34	otu585	D_0__Bacteria;D_1__Patescibacteria;D_2__Parcubacteria	0	0	0	0	0	0	0	0	16	0	0	0	0	0	0	0	0	0	0	0
0fddbb58fe711269861cbdf97bc19b92	otu586	D_0__Bacteria	0	0	0	0	0	0	0	0	0	0	0	0	0	0	0	0	0	4	0	0
0ff2c4cb16813b2011e247c3a5d4fb3a	otu587	D_0__Archaea;D_1__Euryarchaeota;D_2__Halobacteria;D_3__Halobacteriales;D_4__uncultured;D_5__uncultured haloarchaeon;D_6__uncultured haloarchaeon	39	32	17	25	67	63	204	52	22	21	17	20	49	90	56	10	121	45	177	50
100afdca01fa083a13a2db513e49ba1e	otu588	D_0__Bacteria;D_1__Lentisphaerae;D_2__Oligosphaeria;D_3__Oligosphaerales;D_4__Oligosphaeraceae	16	14	39	0	123	71	101	104	91	66	12	92	176	15	111	303	0	6	12	0
10103a09e764a7c22ef4d3226bc9750e	otu589	D_0__Bacteria	0	0	0	0	0	0	28	0	0	0	0	0	0	0	0	0	0	0	0	0
10139902fc8be372e7fa55318e744f2a	otu590	D_0__Bacteria	0	3	0	0	0	0	0	0	0	0	0	0	0	0	0	0	0	0	0	0
101a9044c9168bac443cc4c88ce3a879	otu591	D_0__Archaea;D_1__Nanoarchaeaeota;D_2__Woesearchaeia;D_3__uncultured euryarchaeote;D_4__uncultured euryarchaeote;D_5__uncultured euryarchaeote;D_6__uncultured euryarchaeote	0	0	0	0	0	0	0	0	84	7	5	125	16	0	0	0	0	0	0	0
10285cdc104281c38c737ca60a177b84	otu592	D_0__Archaea;D_1__Nanoarchaeaeota;D_2__Woesearchaeia;D_3__uncultured euryarchaeote;D_4__uncultured euryarchaeote;D_5__uncultured euryarchaeote;D_6__uncultured euryarchaeote	0	9	0	0	0	0	0	0	47	0	14	55	0	0	0	0	0	0	4	0
1028f30bacc8a1c851a9bf2d85a0742a	otu593	D_0__Bacteria	0	0	0	0	0	0	0	0	0	0	0	3	0	0	0	0	0	0	0	0
102b0f5333e436d5aebfb59b404a860e	otu594	D_0__Bacteria;D_1__Planctomycetes;D_2__Planctomycetacia;D_3__Pirellulales;D_4__Pirellulaceae;D_5__Roseimaritima;	0	3	0	0	0	0	0	0	0	0	0	0	0	0	0	0	0	0	0	0
103efa06a90910891782b012ead7fe75	otu595	D_0__Bacteria	0	0	4	0	0	0	0	0	0	0	0	0	0	0	0	0	0	0	0	0
1042da4a268b09ce3d19acc6f08b7476	otu596	D_0__Bacteria;D_1__Firmicutes;D_2__Clostridia	0	0	8	0	0	128	33	13	24	5	7	20	32	6	5	9	0	0	0	0
104a8ea459ad3484f6d444efe0e3116c	otu597	D_0__Bacteria	0	0	0	0	0	0	1	0	0	0	0	7	0	0	0	0	0	0	0	0
104ace3003391b083ca1d66660cc0598	otu598	D_0__Archaea;D_1__Nanoarchaeaeota;D_2__Woesearchaeia	0	0	0	0	0	0	0	0	3	0	0	0	0	0	0	0	0	0	0	0
104d65f5502a99b709e1d538db0a4b33	otu599	D_0__Bacteria	0	0	0	0	5	0	0	0	0	0	0	0	0	0	0	0	0	0	0	0
105325e3a26c2a64e61e2a638fdc3fb9	otu600	D_0__Bacteria	15	64	93	0	132	106	148	35	0	0	0	6	0	201	0	322	0	0	0	0
105c4cb270601c22334ce856a3338f3f	otu601	D_0__Bacteria	0	0	0	0	0	0	0	0	0	0	18	0	4	0	0	0	0	0	0	0
105d4a2203ae707d4ce91aa87841985b	otu602	D_0__Bacteria	0	0	0	0	0	0	0	0	0	0	0	0	0	0	0	8	0	0	0	0
1060fc4e477affc56571ee6c43b081ab	otu603	D_0__Bacteria	0	0	0	0	0	0	0	0	0	0	0	0	0	0	2	0	0	0	0	0
106af8c30149afed06b1ccfdf8e98af8	otu604	D_0__Archaea;D_1__Nanoarchaeaeota;D_2__Nanohaloarchaeia;D_3__Aenigmarchaeales;D_4__hypersaline lake metagenome;D_5__hypersaline lake metagenome;D_6__hypersaline lake metagenome	0	0	0	0	1	0	5	0	106	87	83	14	139	20	270	12	153	3	23	98
106fade586875eca4ec079f46c8e73a2	otu605	D_0__Bacteria	0	0	0	0	0	0	0	0	0	0	0	0	0	2	0	0	0	0	0	0
107213e43bc59bea93a214465c802764	otu606	D_0__Bacteria;D_1__Kiritimatiellaeota;D_2__Kiritimatiellae;D_3__WCHB1-41	0	5	0	0	0	19	0	6	0	0	0	0	0	0	0	0	0	0	0	0
10753a6227cb2a874359949d84df6c0b	otu607	D_0__Bacteria	0	0	0	0	0	0	0	0	0	0	0	2	0	0	0	0	0	0	0	0
107838c09c874dd69585bcd8f826a3ea	otu608	D_0__Bacteria	0	0	0	0	0	0	0	0	0	0	3	0	0	0	0	0	0	0	0	0
1081af61ebefafce82a49f1a0920ce60	otu610	D_0__Bacteria;D_1__Proteobacteria;D_2__Deltaproteobacteria	0	0	0	0	1	10	0	0	0	0	0	0	0	0	0	0	0	0	0	0
10839892fd2439bcd37ad60dcd69999a	otu611	D_0__Bacteria;D_1__Actinobacteria;D_2__Nitriliruptoria;D_3__Nitriliruptorales;D_4__Nitriliruptoraceae;D_5__uncultured bacterium;D_6__uncultured bacterium	0	0	0	0	0	0	0	0	0	0	0	0	4	0	0	0	0	0	0	0
108e997689481bdeb3f5525d38c7b181	otu612	D_0__Bacteria;D_1__Planctomycetes;D_2__Planctomycetacia;D_3__Pirellulales;D_4__Pirellulaceae;D_5__uncultured;D_6__uncultured bacterium	0	0	0	4	0	0	0	0	0	0	0	0	0	0	0	0	0	0	0	0
109f14a74e23dc09c14b60a3e13768be	otu613	D_0__Bacteria;D_1__Firmicutes;D_2__Bacilli;D_3__Bacillales;D_4__Bacillaceae	0	0	0	0	0	0	0	0	0	0	0	0	0	0	0	5	0	0	0	0
10ac53ad5f93c758c3b57cb43ba9664a	otu614	D_0__Bacteria	0	0	0	0	0	0	0	0	0	0	0	0	0	0	0	0	0	6	0	0
10b76c07083ffdf006e717a908fe4a6f	otu615	D_0__Bacteria;D_1__Bacteroidetes;D_2__Bacteroidia;D_3__Cytophagales;D_4__Cytophagaceae;D_5__Cytophaga;D_6__uncultured bacterium	0	1	0	0	0	0	0	0	0	0	0	0	0	0	0	0	0	0	0	0
10bdbed00e0ca99342caeabfcc89b07d	otu616	D_0__Archaea;D_1__Euryarchaeota;D_2__Halobacteria;D_3__Halobacteriales;D_4__Haloferacaceae;D_5__uncultured;	192	108	120	221	11	0	36	38	0	0	0	0	0	15	0	0	0	0	0	0
10c2ec059d0cf263b66c0c2fe3e5c24e	otu617	D_0__Bacteria	0	0	0	0	0	0	0	0	0	0	0	11	0	0	0	0	0	0	0	0
10ceb5354da0f5d88e4ee52f1f6d65aa	otu618	D_0__Bacteria;D_1__Proteobacteria;D_2__Gammaproteobacteria	0	0	0	0	0	0	0	0	3	0	0	0	0	0	0	0	0	0	0	0
10d8fdaa6f1bd2f54c1cd7e4c868aefa	otu619	D_0__Archaea;D_1__Euryarchaeota;D_2__Halobacteria;D_3__Halobacteriales;D_4__Halomicrobiaceae;D_5__uncultured archaeon;D_6__uncultured archaeon	0	0	0	0	0	0	0	0	0	0	0	0	0	7	0	0	0	0	0	0
10e2d307aadd2c996dd35cfc40b041fb	otu620	D_0__Bacteria;D_1__Firmicutes;D_2__Bacilli;D_3__Lactobacillales;D_4__Streptococcaceae;D_5__Streptococcus;	0	0	0	0	0	0	0	0	0	0	0	0	0	0	0	9	0	0	0	0
10eae5c5beb71c5dfb4cd91ffab8f359	otu621	D_0__Bacteria	0	0	2	5	0	0	0	2	0	0	0	0	0	0	0	0	0	0	0	0
10ed3dba23635b82ec96e0b6e9b59a5f	otu622	D_0__Bacteria;D_1__Kiritimatiellaeota;D_2__Kiritimatiellae;D_3__WCHB1-41	0	0	0	0	0	0	0	0	0	0	0	0	0	0	0	55	0	0	0	0
10f753d133ab3974801055f67bbcf5b2	otu623	D_0__Archaea;D_1__Euryarchaeota;D_2__Halobacteria;D_3__Halobacteriales;D_4__Haloferacaceae;D_5__uncultured;D_6__soda lake metagenome	33	17	0	5	0	0	0	19	0	0	9	65	13	18	31	0	8	20	22	14
110d69824a8773ed3bbe9cea200e4681	otu624	D_0__Bacteria;D_1__Planctomycetes;D_2__OM19;D_3__uncultured bacterium;D_4__uncultured bacterium;D_5__uncultured bacterium;D_6__uncultured bacterium	3	0	0	57	70	19	32	11	0	0	0	47	0	0	2	0	0	0	0	0
1114da70eac1729daff8150d13bfb28f	otu625	D_0__Bacteria;D_1__Firmicutes;D_2__Clostridia;D_3__Clostridiales;D_4__Family XVIII;D_5__Symbiobacterium;D_6__Clostridiales bacterium AND1	0	2	0	0	0	0	0	0	0	0	0	0	0	0	0	0	0	0	1	0
11192512e2092f57342729536aaa9eff	otu626	D_0__Bacteria	0	0	0	0	0	0	0	0	0	0	1	0	0	0	0	0	0	0	0	0
1119af2a4b4bd0b9cf86a414093c44b9	otu627	D_0__Archaea;D_1__Nanoarchaeaeota;D_2__Woesearchaeia	0	0	0	0	36	0	23	0	0	0	0	0	0	0	0	0	0	0	0	0
111a0c9aaf1c9f7d438b64eb3fcedb6e	otu628	D_0__Bacteria;D_1__Kiritimatiellaeota;D_2__Kiritimatiellae;D_3__WCHB1-41	0	45	9	0	44	0	0	21	0	0	0	0	0	0	0	0	0	0	0	0
111af5f32e0bc1815d221beaddba2784	otu629	D_0__Bacteria;D_1__Lentisphaerae;D_2__Lentisphaeria;D_3__Victivallales;D_4__SBZC-4624;D_5__uncultured organism;D_6__uncultured organism	3	0	0	0	0	0	0	0	0	0	0	0	0	0	0	0	0	0	0	0
111ed84d5378648886df46843ec2202a	otu630	D_0__Bacteria;D_1__Verrucomicrobia;D_2__Verrucomicrobiae;D_3__Verrucomicrobiales;D_4__Rubritaleaceae;D_5__Luteolibacter;	0	32	2	0	0	0	0	0	63	0	0	3	0	0	0	0	0	0	0	5
112486b3810b679e7badb5d2fcfba1e5	otu631	D_0__Bacteria;D_1__Planctomycetes;D_2__Planctomycetacia;D_3__Isosphaerales;D_4__Isosphaeraceae;D_5__uncultured;D_6__uncultured bacterium	0	0	0	7	0	0	0	0	0	0	0	0	0	0	0	0	0	0	0	0
112b47ec10045b4b7869bd5d2751b4c8	otu632	D_0__Bacteria;D_1__Planctomycetes;D_2__Planctomycetacia;D_3__Pirellulales;D_4__Pirellulaceae	0	0	0	0	0	0	0	0	0	0	0	0	0	0	13	0	0	0	0	0
112ca8f4d7352143bc961c4451ab3319	otu633	D_0__Archaea;D_1__Nanoarchaeaeota;D_2__Woesearchaeia;D_3__uncultured archaeon;D_4__uncultured archaeon;D_5__uncultured archaeon;D_6__uncultured archaeon	0	0	0	0	0	2	0	0	0	0	0	0	0	0	0	0	0	0	0	0
112eac1979115c913f2dfcfef3dec8b8	otu634	D_0__Bacteria	0	0	0	0	0	0	0	0	0	0	0	0	0	0	0	0	0	0	6	0
11304f2e71e85806cfe4be2eebd5c7f3	otu635	D_0__Archaea;D_1__Euryarchaeota;D_2__Halobacteria;D_3__Halobacteriales;D_4__Haloferacaceae;D_5__Natronorubrum;D_6__uncultured haloarchaeon	0	0	0	0	0	0	0	0	0	0	0	0	0	0	7	0	0	0	0	0
1135a75fb058e8155e1acd890ae2202d	otu636	D_0__Bacteria;D_1__Planctomycetes;D_2__Planctomycetacia;D_3__Pirellulales;D_4__Pirellulaceae;D_5__uncultured;	0	0	0	0	33	0	6	0	0	0	0	0	0	0	0	0	0	0	0	0
113760e91178bf09ed2435558ef277df	otu637	D_0__Bacteria	0	0	0	0	0	0	0	0	0	0	0	0	0	6	0	0	0	0	0	0
113eab2892c3606310496d7f8eb35c66	otu638	D_0__Bacteria	4	0	6	0	0	0	0	0	0	0	0	0	0	0	0	0	0	0	0	0
1141502becedeb095355be16f89bf1ed	otu639	D_0__Bacteria;D_1__Proteobacteria;D_2__Gammaproteobacteria;D_3__Ectothiorhodospirales;D_4__Ectothiorhodospiraceae;D_5__Halofilum;	0	0	0	0	6	0	0	0	0	0	0	0	0	0	0	0	0	0	0	0
1143713d591ed6316f7288913b2f66aa	otu640	D_0__Bacteria	15	41	22	21	0	0	0	0	0	0	0	0	0	0	0	0	0	0	0	0
1143e77e1416ed9ed68666cb5e95815c	otu641	D_0__Archaea;D_1__Euryarchaeota;D_2__Halobacteria;D_3__Halobacteriales;D_4__Haloferacaceae;D_5__uncultured;D_6__uncultured haloarchaeon	0	9	15	0	0	0	7	0	0	0	0	0	0	0	0	0	0	0	0	0
11474bf36a801bfbf4783286676094b5	otu642	D_0__Archaea;D_1__Nanoarchaeaeota;D_2__Woesearchaeia	0	4	0	0	0	3	0	0	0	21	4	14	0	0	0	0	0	5	0	5
1155807eee3734c14ef21a41ec9c3ecf	otu644	D_0__Bacteria	0	0	7	0	0	0	0	0	0	0	0	0	0	0	0	0	0	0	0	0
1156478ea5bb0d3dfc5dd7928c6f21ab	otu645	D_0__Bacteria	0	0	0	0	0	0	0	0	0	0	0	0	0	2	0	0	0	0	0	0
11564f73c3e4db54cb8f20f7d3b611b3	otu646	D_0__Bacteria;D_1__Actinobacteria;D_2__Thermoleophilia;D_3__Solirubrobacterales;D_4__Solirubrobacteraceae;D_5__Conexibacter;	0	0	0	0	0	0	0	0	0	0	0	4	0	0	0	0	0	0	0	0
116255a69eb7ebebbb8891bdc59c059c	otu647	D_0__Bacteria	0	0	0	0	0	26	0	0	0	0	0	0	0	0	0	0	0	0	0	0
117147a77d22911e68e41eb1098c5e7a	otu648	D_0__Bacteria;D_1__Planctomycetes	471	638	609	429	884	460	493	400	320	33	45	334	151	91	152	1269	6	4	3	14
1174f0687f221cae6dd76890204a028c	otu649	D_0__Bacteria	0	0	0	0	0	0	0	0	0	0	0	0	19	0	0	0	0	0	0	0
11a0c7dfc14bd3d31c9b4c240562fd53	otu650	D_0__Bacteria;D_1__Actinobacteria;D_2__Actinobacteria;D_3__Bifidobacteriales;D_4__Bifidobacteriaceae;D_5__Bifidobacterium;	0	0	0	0	0	0	0	0	0	0	0	0	11	0	0	0	0	0	0	0
11a12be1e1f4173ede2ed63663c2438f	otu651	D_0__Archaea;D_1__Euryarchaeota;D_2__Thermoplasmata;D_3__Methanomassiliicoccales;D_4__Methanomethylophilaceae;D_5__uncultured;D_6__uncultured euryarchaeote	49	0	24	0	0	0	0	147	0	0	0	0	0	0	0	0	0	0	0	0
11a5b5b3eda822a9618162a7ae70a8d9	otu652	D_0__Bacteria	0	0	0	0	0	0	0	0	0	0	0	4	0	0	0	0	0	0	0	0
11a664690f6955e3b6fe345d081c7b42	otu653	D_0__Bacteria;D_1__Planctomycetes;D_2__Planctomycetacia;D_3__Pirellulales;D_4__Pirellulaceae;D_5__Pir4 lineage;D_6__uncultured organism	0	18	14	7	0	0	0	0	0	0	0	0	0	0	0	0	0	0	0	0
11a755b7b215919ae73dbde140bd335d	otu654	D_0__Archaea;D_1__Euryarchaeota;D_2__Halobacteria;D_3__Halobacteriales;D_4__Halomicrobiaceae;D_5__Natronomonas;	0	0	0	0	0	50	20	0	0	0	0	0	0	0	0	0	0	0	0	0
11a7c5b6c33c7c11f0aef0a9dcb7f4a6	otu655	D_0__Bacteria	0	0	0	0	0	0	0	0	0	0	0	0	4	0	0	0	0	0	0	0
11a8af5f885e1fb26594bc5f042979b6	otu656	D_0__Bacteria;D_1__Firmicutes;D_2__Clostridia;D_3__Clostridiales;D_4__Syntrophomonadaceae;D_5__uncultured;D_6__uncultured low G+C Gram-positive bacterium	0	0	7	0	0	0	0	0	0	0	0	0	0	0	0	0	0	0	0	0
11b071e90dd40121e6ee82bfc4260191	otu657	D_0__Archaea;D_1__Hadesarchaeaeota	0	0	0	0	0	0	0	0	0	19	25	0	0	0	0	0	23	0	0	0
11b1030fdedc31f5603aae7fbd1629b8	otu658	D_0__Bacteria	0	0	0	0	0	0	0	7	0	0	0	0	0	0	0	0	0	0	0	0
11c2d9c6c8ee5bea3ba5940061c1ca1e	otu659	D_0__Bacteria;D_1__Planctomycetes;D_2__Planctomycetacia;D_3__Planctomycetales	0	17	45	18	24	0	5	0	0	0	0	5	0	40	0	0	0	2	0	0
11d1e0fac886a47a945f68e1554ad5df	otu661	D_0__Archaea;D_1__Euryarchaeota;D_2__Halobacteria;D_3__Halobacteriales;D_4__Haloferacaceae	0	0	0	0	11	0	0	0	0	0	0	0	0	0	0	0	0	0	0	0
11dae4e59ccfcdd6190bf4785aa2cc94	otu662	D_0__Bacteria	0	0	0	0	0	0	0	0	0	0	0	0	0	0	0	3	0	0	0	0
11ee68716bfa59c8492302d58f30bf25	otu663	D_0__Bacteria	0	0	0	0	0	0	0	0	0	0	0	6	0	0	0	0	0	0	0	0
11f561c26ac363aae37dbcae9d1923e9	otu664	D_0__Bacteria	0	23	31	0	12	0	0	20	0	0	0	0	0	0	0	0	0	0	0	0
11f6e7f2dbd531083b64f2b53e539e76	otu665	D_0__Archaea;D_1__Euryarchaeota;D_2__Halobacteria;D_3__Halobacteriales;D_4__Haloferacaceae;D_5__Halovenus;	0	0	0	0	0	0	0	0	6	0	0	0	0	0	0	0	0	0	0	0
1201ddc99da890c1d6bbb199e5765129	otu666	D_0__Archaea;D_1__Diapherotrites;D_2__Iainarchaeia;D_3__uncultured archaeon;D_4__uncultured archaeon;D_5__uncultured archaeon;D_6__uncultured archaeon	10	0	7	5	136	1752	761	5012	335	76	168	1762	669	204	665	21	38	20	22	37
1208720880b9f31224762be76f9a5d71	otu668	D_0__Bacteria	0	0	5	0	0	0	0	0	0	0	0	0	0	0	0	0	0	0	0	0
120cd982356e947688e7356770940b12	otu669	D_0__Archaea;D_1__Euryarchaeota;D_2__Halobacteria;D_3__Halobacteriales;D_4__Haloferacaceae;D_5__Halohasta;D_6__uncultured archaeon	0	0	0	0	0	0	0	0	0	0	0	0	0	0	0	0	0	11	0	0
1212a075ecd096f06901b56302e7ec8e	otu670	D_0__Archaea;D_1__Euryarchaeota;D_2__Halobacteria;D_3__Halobacteriales;D_4__Haloferacaceae;D_5__uncultured;D_6__uncultured haloarchaeon	0	7	0	0	0	0	0	0	0	0	0	0	0	0	0	0	0	0	0	0
1212feada2fa90f8c121440de2a3c120	otu671	D_0__Bacteria;D_1__Firmicutes;D_2__Clostridia	0	0	0	0	0	0	0	0	5	0	0	0	0	0	0	0	0	0	0	0
12175a708cd94dd6917df3071c59e977	otu672	D_0__Bacteria;D_1__Firmicutes	0	0	0	0	0	0	0	0	0	0	0	0	0	0	1	0	0	0	0	0
121ce7a3ca2bf474dd8d85180a2fa769	otu673	D_0__Archaea;D_1__Nanoarchaeaeota;D_2__Woesearchaeia;D_3__unidentified archaeon;D_4__unidentified archaeon;D_5__unidentified archaeon;D_6__unidentified archaeon	0	3	1	15	255	0	116	13	0	0	0	0	0	0	0	7	0	0	0	0
1222d52adc5dd72c29f3b2f7c42527e9	otu674	D_0__Bacteria;D_1__Patescibacteria;D_2__Parcubacteria;D_3__uncultured bacterium;D_4__uncultured bacterium;D_5__uncultured bacterium;D_6__uncultured bacterium	0	0	0	0	0	0	0	0	3	0	0	24	0	0	24	0	0	0	0	0
12255b0d5df49c92643df3529d97a178	otu675	D_0__Bacteria;D_1__Proteobacteria;D_2__Deltaproteobacteria	2	0	0	0	0	0	0	0	0	0	0	0	0	0	0	0	0	0	0	0
12341b9ba2ef80dab8d0e245b717d9a0	otu676	D_0__Bacteria	0	0	2	0	0	0	0	0	0	0	0	0	0	0	0	54	0	0	0	0
1251af8588b9cd743939faa60bb4130e	otu677	D_0__Archaea;D_1__Euryarchaeota;D_2__Halobacteria;D_3__Halobacteriales;D_4__uncultured;D_5__uncultured haloarchaeon;D_6__uncultured haloarchaeon	11	29	13	0	68	0	58	38	8	12	5	8	6	0	0	0	27	13	42	24
1256628cbc095d97d1f1e3ddb323ea5d	otu678	D_0__Archaea;D_1__Nanoarchaeaeota;D_2__Woesearchaeia;D_3__Candidatus Pacearchaeota archaeon CG1_2_32_21;D_4__Candidatus Pacearchaeota archaeon CG1_2_32_21;D_5__Candidatus Pacearchaeota archaeon CG1_2_32_21;D_6__Candidatus Pacearchaeota archaeon CG1_2_32_21	0	0	0	0	0	0	0	0	30	0	6	0	14	2	1	0	0	0	0	0
125823a51607b18e638f63176b71d5f6	otu679	D_0__Bacteria;D_1__Firmicutes;D_2__Clostridia;D_3__Clostridiales;D_4__Syntrophomonadaceae;D_5__uncultured;D_6__uncultured low G+C Gram-positive bacterium	32	131	60	69	44	16	41	0	0	0	15	30	0	26	0	101	0	0	0	0
125c495144993e6027aa834ac9c7ab4c	otu680	D_0__Bacteria;D_1__Planctomycetes	9	47	44	255	5	11	16	27	0	14	0	0	0	21	0	12	0	0	0	0
1261d939d05f5c1029df1a94cf45bb72	otu681	D_0__Bacteria;D_1__Patescibacteria;D_2__Parcubacteria;D_3__uncultured bacterium;D_4__uncultured bacterium;D_5__uncultured bacterium;D_6__uncultured bacterium	14	0	7	0	0	0	0	0	0	0	0	0	0	0	0	0	0	0	0	0
12656ffd37881a7c12e69d5227b42e95	otu682	D_0__Bacteria;D_1__Firmicutes;D_2__Clostridia	0	0	0	0	0	0	0	0	0	0	0	0	0	0	0	0	3	0	4	0
126c4687d1d4995b70badcf29f08a0e0	otu683	D_0__Bacteria	0	0	0	0	0	0	0	0	0	0	0	0	0	0	0	2	0	0	0	0
127466ac01de5ffa1f2c5bda6b06c978	otu684	D_0__Bacteria	0	0	0	0	0	0	0	0	0	0	0	0	0	0	7	0	0	0	0	0
12752e9848769f3bcffaecbfdbcf915c	otu685	D_0__Bacteria;D_1__Planctomycetes;D_2__Planctomycetacia;D_3__Isosphaerales;D_4__Isosphaeraceae;D_5__uncultured;	0	52	14	21	0	57	2	20	0	55	14	0	17	62	27	0	13	0	0	0
12779033fec1ab846f4ad3ed67429635	otu686	D_0__Bacteria;D_1__Planctomycetes;D_2__Planctomycetacia;D_3__Pirellulales;D_4__Pirellulaceae;D_5__Pir4 lineage;D_6__uncultured organism	0	26	0	0	0	0	0	0	0	0	0	0	0	0	0	0	0	0	0	0
127ddb23e2b16e786e744599394f97cb	otu687	D_0__Bacteria	0	0	0	0	0	0	0	0	0	0	0	0	0	0	0	6	0	0	0	0
1293ab917566f1e7e3168e4e808704c8	otu688	D_0__Archaea;D_1__Nanoarchaeaeota;D_2__Woesearchaeia;D_3__uncultured archaeon;D_4__uncultured archaeon;D_5__uncultured archaeon;D_6__uncultured archaeon	0	0	0	0	0	0	0	18	0	0	0	0	0	0	0	0	0	0	0	0
129856b48f851923fa89a9654f276ed5	otu689	D_0__Bacteria	0	0	0	0	0	0	0	0	7	9	0	0	0	0	0	0	0	0	5	0
129b688f44c86045a6b528227f404494	otu690	D_0__Bacteria	0	2	0	0	0	0	0	0	0	0	0	0	0	0	0	0	0	0	0	0
12a18a8ebe6d2e434a10b25612d0c1cb	otu691	D_0__Bacteria	0	8	0	0	0	0	0	0	0	0	0	0	0	0	0	0	0	0	0	0
12a583475f52550b2d5275183352e701	otu692	D_0__Bacteria	0	0	0	0	0	0	0	12	0	0	0	0	0	0	0	0	0	0	0	0
12b3133e3ef5f3f3b0769bc0c760eb4e	otu693	D_0__Archaea;D_1__Euryarchaeota;D_2__Halobacteria;D_3__Halobacteriales;D_4__Haloferacaceae;D_5__uncultured;D_6__Halovivax sp.	242	72	46	0	43	7	0	48	0	0	0	0	0	0	0	7	0	0	0	0
12b32abbc3c5e6997bfb12e4be050fb1	otu694	D_0__Bacteria	0	0	0	0	0	0	0	0	0	0	0	5	0	0	0	0	0	0	0	0
12b89a48e7b5cd246fbb6a6c85b15e7f	otu695	D_0__Bacteria;D_1__Cloacimonetes;D_2__Cloacimonadia;D_3__Cloacimonadales;D_4__MSBL8;D_5__uncultured bacterium;D_6__uncultured bacterium	0	0	0	2	0	0	0	0	0	0	0	0	0	0	0	0	0	0	0	0
12b90e0645493dd0cb7c50b4654ccda5	otu696	D_0__Bacteria	0	0	0	0	0	0	0	0	0	0	0	0	0	0	0	0	0	5	0	0
12d48508d7c5aee9749ed377b69f290c	otu697	D_0__Archaea;D_1__Euryarchaeota;D_2__Halobacteria;D_3__Halobacteriales;D_4__Haloferacaceae;D_5__Halorubrum;	0	8	2	0	0	9	6	8	39	22	31	116	203	39	250	0	65	56	40	8
12e82c3cff8856f268d21c20368e20e6	otu698	D_0__Archaea;D_1__Euryarchaeota;D_2__Halobacteria;D_3__Halobacteriales;D_4__uncultured;D_5__uncultured haloarchaeon;D_6__uncultured haloarchaeon	0	1	0	0	0	0	0	0	0	0	0	0	0	0	0	0	0	0	0	0
12e97b90b1e5c9c5c489dc97ddb63008	otu699	D_0__Bacteria	0	0	0	0	0	0	0	0	0	0	0	0	1	0	0	0	0	0	0	0
12ec9c4523bb1f6414d6122f2c3e9e49	otu700	D_0__Bacteria;D_1__Kiritimatiellaeota;D_2__Kiritimatiellae;D_3__WCHB1-41;D_4__uncultured organism;D_5__uncultured organism;D_6__uncultured organism	0	0	0	0	0	0	0	0	0	0	0	0	6	0	0	0	0	0	0	0
12f868bd6bbcf47df8f713048e3b6bd5	otu701	D_0__Bacteria	0	0	0	0	0	0	0	0	7	0	0	0	0	0	0	0	0	0	0	0
12fbeac78cc869249f6f98ac92706f8c	otu702	D_0__Archaea;D_1__Euryarchaeota;D_2__Halobacteria;D_3__Halobacteriales;D_4__Haloferacaceae;D_5__Halorubrum;	0	0	0	0	0	0	0	0	0	0	0	0	0	0	9	0	0	0	0	0
12fc1df67862887fa9bf50a256154650	otu703	D_0__Bacteria	0	0	0	0	0	0	5	0	0	0	0	0	0	0	0	0	0	0	0	0
12fcaa0834d05649345ae79b06a838e6	otu704	D_0__Archaea;D_1__Euryarchaeota;D_2__Halobacteria;D_3__Halobacteriales;D_4__Haloferacaceae;D_5__Halorubrum;D_6__uncultured archaeon	0	0	13	0	0	0	0	0	0	0	0	0	0	0	7	0	0	0	0	0
13020b586a6170d3c2ff2fe98cb8b181	otu705	D_0__Bacteria	0	0	0	0	0	0	0	0	0	0	0	0	0	14	3	0	0	0	0	0
130c97c5a41621e663d28151007aeda0	otu706	D_0__Bacteria	0	0	0	0	13	0	0	0	0	0	0	0	0	0	0	0	0	0	0	0
131de83703f7051d0d4d7f168f718eeb	otu707	D_0__Bacteria	0	5	5	0	0	0	2	0	0	0	0	0	0	0	0	0	0	0	0	0
1321bd0f6496f3b103b1d22d6488ac5b	otu708	D_0__Bacteria;D_1__Verrucomicrobia;D_2__Verrucomicrobiae;D_3__Pedosphaerales;D_4__Pedosphaeraceae;D_5__uncultured bacterium;D_6__uncultured bacterium	0	0	0	0	0	0	4	0	0	0	0	0	0	0	0	0	0	0	0	0
1322b778db67339aa5bb05acd78d895e	otu709	D_0__Bacteria;D_1__Planctomycetes;D_2__Planctomycetacia;D_3__Pirellulales;D_4__Pirellulaceae;D_5__uncultured;	0	0	0	0	5	0	0	0	0	0	0	0	0	0	0	0	0	0	0	0
132dda93f086fde6b9a68b26d2d516f3	otu710	D_0__Bacteria	0	7	0	9	0	0	0	0	0	0	0	0	0	0	0	0	0	0	0	0
1333363671c4327018935cdee3cc0674	otu711	D_0__Bacteria	0	0	7	3	6	0	0	5	0	0	0	0	0	0	0	0	0	0	0	0
1336b3705f62758ead94b7e882797398	otu712	D_0__Bacteria	0	0	0	0	0	0	0	0	0	0	0	0	0	0	0	5	0	0	0	0
133eccbe425ed29ecb7b93702de13d03	otu713	D_0__Archaea;D_1__Euryarchaeota;D_2__Halobacteria;D_3__Halobacteriales;D_4__Halococcaceae;D_5__Halococcus;D_6__uncultured archaeon	0	0	0	0	0	0	0	0	0	0	0	0	0	0	0	0	0	2	2	0
13409a2d6afabb962f18eaf9d395f02c	otu714	D_0__Bacteria	0	0	0	0	0	0	0	0	1	0	0	0	0	0	0	0	0	0	0	0
134ab0a0d5f88d6705bee323773739f7	otu716	D_0__Bacteria;D_1__Firmicutes;D_2__Clostridia	0	0	0	0	0	0	0	0	0	0	0	1	0	4	0	0	0	0	0	0
134d877339cebb7eb07e0b282917e852	otu717	D_0__Bacteria;D_1__Patescibacteria;D_2__Parcubacteria	133	103	182	36	0	9	5	111	11	34	9	0	36	9	0	0	0	0	0	0
134e5fa6bf0f08505a3974d887c8b559	otu718	D_0__Bacteria	0	0	0	0	0	0	0	2	0	0	0	0	0	0	0	0	0	0	0	0
135bf8dc26fcb8cc277e061de3af0b67	otu719	D_0__Bacteria;D_1__Verrucomicrobia;D_2__Verrucomicrobiae;D_3__Verrucomicrobiales;D_4__Rubritaleaceae;D_5__Luteolibacter;D_6__uncultured bacterium	0	3	0	0	0	0	0	0	0	0	0	0	0	0	0	0	0	0	0	0
1363f48652e8ea4bbeeae7b86a0a0642	otu720	D_0__Bacteria;D_1__Firmicutes;D_2__Clostridia;D_3__Clostridiales;D_4__Ruminococcaceae;D_5__Saccharofermentans;	22	0	0	0	11	0	0	0	0	0	0	0	0	0	0	0	0	0	0	0
136c17902de134f2278d03b68817a680	otu721	D_0__Bacteria	0	3	0	0	0	0	0	0	0	0	0	0	0	0	0	0	0	0	0	0
136d48e2c9b29230fbee93b7b23dfeb1	otu722	D_0__Bacteria	0	0	0	0	0	0	0	0	0	0	0	0	0	2	0	0	0	0	0	0
1375cc9d8c4cf3947d0ba4fd2f8c857e	otu723	D_0__Archaea;D_1__Euryarchaeota;D_2__Halobacteria;D_3__Halobacteriales;D_4__uncultured;D_5__uncultured haloarchaeon;D_6__uncultured haloarchaeon	0	0	0	0	0	0	0	0	0	0	0	6	0	0	10	0	0	0	10	0
1378481137c1226ec36983de7b33d41e	otu724	D_0__Bacteria	0	0	9	0	0	0	0	0	0	0	0	0	0	0	0	0	0	0	0	0
1393079fa7592fa50572cbc760b45fb9	otu725	D_0__Archaea;D_1__Nanoarchaeaeota;D_2__Woesearchaeia;D_3__Candidatus Pacearchaeota archaeon CG1_2_32_21;D_4__Candidatus Pacearchaeota archaeon CG1_2_32_21;D_5__Candidatus Pacearchaeota archaeon CG1_2_32_21;D_6__Candidatus Pacearchaeota archaeon CG1_2_32_21	0	0	0	0	0	0	0	0	0	0	0	10	0	0	0	0	0	0	0	0
1394c9be98438eb824f325813a552389	otu726	D_0__Bacteria;D_1__Omnitrophicaeota;D_2__uncultured bacterium;D_3__uncultured bacterium;D_4__uncultured bacterium;D_5__uncultured bacterium;D_6__uncultured bacterium	0	0	0	26	0	0	0	0	0	0	0	0	0	0	0	0	0	0	0	0
139b3656380c1530ab6d66949da308d5	otu727	D_0__Bacteria;D_1__Firmicutes;D_2__Clostridia;D_3__Clostridiales;D_4__Peptococcaceae;D_5__BRH-c8a;D_6__Desulfotomaculum sp. MP14 PS13	0	0	1	0	0	0	0	0	0	0	0	0	0	0	0	0	0	0	0	0
13a3db2946bea02e3495b81321a30004	otu728	D_0__Archaea;D_1__Nanoarchaeaeota;D_2__Woesearchaeia	0	0	0	0	0	0	0	0	0	0	0	0	0	0	0	21	0	0	0	0
13ad2786bae890d8cbba62f7e006f94f	otu729	D_0__Bacteria	0	0	0	0	0	0	0	0	0	0	3	0	0	0	0	0	0	0	0	0
13b25b8b651220c7e34f2c2302cf4c0b	otu730	D_0__Archaea;D_1__Euryarchaeota;D_2__Halobacteria;D_3__Halobacteriales;D_4__uncultured;D_5__uncultured haloarchaeon;D_6__uncultured haloarchaeon	0	14	10	9	0	0	0	0	0	0	0	0	0	0	0	0	0	0	0	0
13b57d701b12d4dcfe2bf24e8f26416f	otu731	D_0__Bacteria	0	0	0	0	0	0	0	0	0	0	44	0	0	0	0	0	0	0	0	0
13bb9e21ac7474f79e0a162de895235c	otu732	D_0__Bacteria	0	0	0	0	0	0	0	0	2	0	0	4	0	0	0	0	0	0	0	0
13bf2cc86dc45875769e2d5b2fe70a77	otu733	D_0__Archaea;D_1__Nanoarchaeaeota;D_2__Woesearchaeia	0	0	0	0	0	0	0	0	0	0	0	0	0	0	0	11	0	0	0	0
13c11f77da285788e8bf317f26b0ad0d	otu734	D_0__Bacteria	0	0	0	0	0	0	0	0	0	10	0	0	0	0	0	5	0	21	14	5
13c3b08337a89c46c80d88e30b8ed06e	otu735	D_0__Archaea;D_1__Nanoarchaeaeota;D_2__Woesearchaeia	91	117	76	26	0	35	20	120	7	0	0	0	0	0	0	0	0	0	0	0
13cfd0c711385d67af1e2a84d9dcf3a9	otu736	D_0__Bacteria;D_1__Proteobacteria;D_2__Gammaproteobacteria;D_3__Pseudomonadales;D_4__Pseudomonadaceae;D_5__Pseudomonas;D_6__Pseudomonas sp. B1(27)	0	6	0	0	0	0	0	0	0	0	0	0	0	0	0	0	0	0	0	0
13d4500c2662530604ddfd76ee0678d8	otu737	D_0__Bacteria;D_1__Cloacimonetes;D_2__Cloacimonadia;D_3__Cloacimonadales;D_4__MSBL8;D_5__uncultured bacterium;D_6__uncultured bacterium	0	22	2	28	0	0	0	0	0	0	0	0	0	0	0	0	0	0	0	0
13df18f4705365b7467c507bc4c66ccf	otu738	D_0__Bacteria	0	0	0	0	0	0	0	0	0	0	0	0	0	6	0	0	0	0	0	0
13eaf725a9fb9eeeddb24c0829dbdbda	otu739	D_0__Bacteria;D_1__Spirochaetes;D_2__Spirochaetia;D_3__Spirochaetales;D_4__Spirochaetaceae;D_5__Spirochaeta 2;D_6__uncultured spirochete	0	0	0	0	0	0	0	0	0	0	0	0	0	18	0	0	0	0	0	0
13ec1228666b085ce1a89b633741faf2	otu740	D_0__Bacteria	0	0	0	0	0	0	0	3	0	0	0	0	0	0	0	0	0	0	0	0
13f25924b7a3145c0822731a22a4d3c1	otu741	D_0__Archaea;D_1__Euryarchaeota;D_2__Halobacteria;D_3__Halobacteriales;D_4__Haloferacaceae	0	0	0	0	0	0	16	0	0	0	0	0	0	0	0	0	0	0	0	0
13f3e413906a99bf2edbb4836bc0de6f	otu742	D_0__Bacteria	0	0	0	0	0	11	11	3	6	8	10	42	39	31	0	0	0	0	0	0
13f9879adb28f54d744a710161acef59	otu743	D_0__Bacteria;D_1__Cyanobacteria;D_2__Oxyphotobacteria;D_3__Synechococcales;D_4__Cyanobiaceae;D_5__Cyanobium PCC-637;D_6__Synechococcus sp. EW15	0	0	0	0	0	0	0	0	0	0	0	0	0	2	0	0	1	0	0	0
1400c1dfc719255a5e962b11522fce87	otu744	D_0__Bacteria;D_1__Firmicutes;D_2__Clostridia	0	0	0	0	0	0	0	0	0	3	0	0	0	0	13	0	0	0	0	0
14017a7ca8ee4f0d5746b28360704d50	otu745	D_0__Bacteria;D_1__Kiritimatiellaeota;D_2__Kiritimatiellae;D_3__WCHB1-41;D_4__uncultured bacterium;D_5__uncultured bacterium;D_6__uncultured bacterium	0	0	0	0	0	0	2	0	0	0	0	0	0	0	0	0	0	0	0	0
1406559b0857c22f6267870c2b42a27d	otu746	D_0__Bacteria	0	0	0	0	0	0	0	0	0	0	0	2	0	0	0	0	0	0	0	0
14141bf3cd522efe227a29b7331174f2	otu747	D_0__Bacteria;D_1__Omnitrophicaeota;D_2__uncultured bacterium;D_3__uncultured bacterium;D_4__uncultured bacterium;D_5__uncultured bacterium;D_6__uncultured bacterium	0	0	3	0	0	0	0	0	0	0	0	0	0	0	0	0	0	0	0	0
1414aeebfef548b30947a1d568055187	otu748	D_0__Bacteria;D_1__Planctomycetes;D_2__vadinHA49;D_3__uncultured bacterium;D_4__uncultured bacterium;D_5__uncultured bacterium;D_6__uncultured bacterium	0	0	0	0	8	0	0	0	0	0	0	0	0	0	0	0	0	0	0	0
141cc631d786d158ae48e50d15d048e9	otu749	D_0__Bacteria	0	0	0	0	0	0	0	0	1	0	0	0	0	0	0	0	0	0	0	0
1425f467a6b592c14ef0e081ca26661c	otu750	D_0__Bacteria	0	0	0	0	0	0	0	0	0	0	0	0	0	0	0	0	19	26	0	0
142db6f70c6d4293ae911e44a7b771ee	otu751	D_0__Bacteria;D_1__Bacteroidetes;D_2__Bacteroidia;D_3__Bacteroidales;D_4__ML635J-4 aquatic group;D_5__uncultured Bacteroidetes bacterium;D_6__uncultured Bacteroidetes bacterium	0	0	0	0	0	0	0	0	0	0	0	0	0	0	0	9	0	0	0	0
1436bac7f56dacf5b464b5ec5d47d425	otu752	D_0__Bacteria;D_1__Planctomycetes;D_2__Planctomycetacia;D_3__Isosphaerales;D_4__Isosphaeraceae;D_5__uncultured;D_6__uncultured bacterium	0	32	13	13	5	0	14	0	0	0	0	0	0	0	0	0	0	0	0	0
143799e3034e3189d9ad4757cbca0d6c	otu753	D_0__Bacteria;D_1__Lentisphaerae;D_2__Oligosphaeria;D_3__Oligosphaerales;D_4__Oligosphaeraceae;D_5__uncultured Verrucomicrobia bacterium;D_6__uncultured Verrucomicrobia bacterium	0	0	0	0	0	0	0	0	30	20	8	54	27	0	19	0	0	0	0	0
144987cad70b78700717a6e900d3945f	otu754	D_0__Bacteria;D_1__Patescibacteria;D_2__Parcubacteria;D_3__uncultured bacterium;D_4__uncultured bacterium;D_5__uncultured bacterium;D_6__uncultured bacterium	0	0	0	0	0	0	0	0	0	1	0	0	0	0	0	0	0	0	0	0
144ed6806183c68b593a348471edb0e9	otu755	D_0__Bacteria	0	0	3	0	0	0	0	0	0	0	0	0	0	0	0	0	0	0	0	0
1452148143fa687e57783bf032fb9a08	otu756	D_0__Bacteria;D_1__Planctomycetes;D_2__Planctomycetacia;D_3__Pirellulales;D_4__Pirellulaceae;D_5__Blastopirellula;D_6__uncultured bacterium	154	422	368	0	407	278	170	155	139	0	0	234	359	48	75	1291	0	0	0	0
14548891a45149dd11d2a662718e08cd	otu757	D_0__Bacteria;D_1__Cloacimonetes;D_2__Cloacimonadia;D_3__Cloacimonadales;D_4__MSBL8;D_5__uncultured bacterium;D_6__uncultured bacterium	0	8	0	0	0	0	0	0	0	0	0	0	0	0	0	0	0	0	0	0
1457b35fee058a72aa2aef11079929e0	otu758	D_0__Bacteria	0	3	0	0	0	0	0	0	0	0	0	0	0	0	0	0	0	0	0	0
1458da99f29951d72ce6f1c0f1c0ba12	otu759	D_0__Bacteria;D_1__Patescibacteria;D_2__Parcubacteria;D_3__uncultured bacterium;D_4__uncultured bacterium;D_5__uncultured bacterium;D_6__uncultured bacterium	93	26	27	8	26	278	188	484	32	75	49	57	118	42	203	4	0	25	41	42
1461c3ce99e30d04b06add358a5b205f	otu760	D_0__Bacteria;D_1__Proteobacteria;D_2__Deltaproteobacteria;D_3__Oligoflexales;D_4__319-6G2	0	0	6	0	0	0	0	0	0	0	0	0	0	0	0	0	0	0	0	0
14623a133c60bcd7f6feb62ce5f0a23a	otu761	D_0__Bacteria;D_1__Firmicutes;D_2__Bacilli;D_3__Lactobacillales;D_4__Lactobacillaceae;D_5__Lactobacillus;	0	0	4	0	0	0	0	0	0	0	0	0	0	0	0	0	0	0	0	0
14690e52905c67be6adc52d8c637eac7	otu762	D_0__Bacteria;D_1__Firmicutes;D_2__Clostridia;D_3__Clostridiales;D_4__Syntrophomonadaceae;D_5__uncultured;D_6__uncultured low G+C Gram-positive bacterium	0	0	0	0	0	0	0	0	0	0	0	0	11	0	0	0	0	0	0	0
146f9a8e1b45eaf07b6df5af55da3f05	otu763	D_0__Bacteria;D_1__Firmicutes;D_2__Clostridia;D_3__Clostridiales;D_4__Syntrophomonadaceae	0	0	0	0	0	0	0	0	0	0	0	0	0	6	3	0	0	0	0	0
1472c71b3e686c2cfdb12d5802d4459a	otu764	D_0__Bacteria	0	0	0	0	0	0	4	0	0	0	0	0	0	0	0	0	0	0	0	0
147a9af24cc645c59cbfc793eac10223	otu765	D_0__Bacteria	0	0	0	0	0	0	22	0	0	0	0	0	0	0	0	0	0	0	0	0
147e25bea6f09bee4aae0c647e9dc7f3	otu766	D_0__Bacteria	0	0	0	0	0	0	0	0	1	0	0	0	0	0	0	0	0	0	0	0
14808617d9b4ac92dea53b2725dfb0cb	otu767	D_0__Bacteria	0	0	0	0	0	0	1	0	0	0	0	0	0	0	0	0	0	0	0	0
1489475659a62ce16579e63a7d601e5b	otu768	D_0__Bacteria	0	0	0	0	0	0	0	5	0	0	0	0	0	0	0	0	0	0	0	0
148dab6cacfb24199db4ed558e3ec3c5	otu769	D_0__Bacteria;D_1__Verrucomicrobia;D_2__Verrucomicrobiae;D_3__Chthoniobacterales;D_4__Chthoniobacteraceae;D_5__Candidatus Udaeobacter;	0	5	0	0	0	0	0	0	0	0	0	0	0	0	0	0	0	0	0	0
148f243cbae3e2acd1a2c4bf77f86e4f	otu770	D_0__Bacteria	0	0	0	0	0	0	0	0	0	0	0	0	0	0	0	0	0	0	2	0
149021d9794c24431ab35851c1a3c3cb	otu771	D_0__Bacteria	0	0	9	1	0	0	4	0	4	0	0	0	0	0	0	5	0	0	0	0
149230b9cfd6752b2a9b3f04e67a7fc5	otu772	D_0__Bacteria	0	2	0	0	0	0	0	0	0	0	0	0	0	0	0	0	0	0	0	0
1492aff4e7c3cafbc381ce4b4351127c	otu773	D_0__Bacteria	0	0	0	0	0	0	0	0	0	0	0	0	0	0	0	0	0	1	0	0
1494f8b68c1ef2a32da10ae0e96109af	otu774	D_0__Archaea;D_1__Nanoarchaeaeota;D_2__Nanohaloarchaeia;D_3__Nanohaloarchaeales;D_4__Nanohaloarchaeaceae	0	0	0	0	0	0	10	0	0	0	0	0	0	0	0	0	0	0	0	0
14a3cf667fe9c0073b4416ca38a27694	otu775	D_0__Bacteria;D_1__Proteobacteria;D_2__Gammaproteobacteria;D_3__Pseudomonadales;D_4__Pseudomonadaceae;D_5__Pseudomonas;	0	0	0	0	0	3	0	0	8	0	0	0	0	0	0	0	0	0	0	0
14a6ebca1da483d0233ff77b615a1a47	otu776	D_0__Bacteria	0	0	0	0	0	0	0	0	0	0	0	0	0	0	0	0	0	0	4	0
14a9b5662d2e32da8481933a796ecc05	otu777	D_0__Bacteria;D_1__Chloroflexi;D_2__Anaerolineae;D_3__SBR131;D_4__uncultured organism;D_5__uncultured organism;D_6__uncultured organism	0	0	0	0	0	5	0	0	0	0	0	24	0	0	0	0	0	0	0	0
14b07accce9f41f435ca0f4f0754591c	otu778	D_0__Archaea;D_1__Euryarchaeota;D_2__Halobacteria;D_3__Halobacteriales;D_4__Haloferacaceae;D_5__Salinarchaeum;D_6__uncultured archaeon	0	0	0	0	0	0	0	0	0	0	0	0	0	0	0	2	0	0	0	0
14b129dc940a7d7dd8ed8675f21f91b8	otu779	D_0__Bacteria	0	0	0	0	40	0	0	18	0	0	0	0	0	0	0	0	0	0	0	0
14b441f900abd1d4174848d8e49e2412	otu780	D_0__Bacteria	0	0	0	0	0	0	0	0	0	0	0	0	4	0	0	0	0	0	0	0
14b6a37bd4edb3f8a2d8e6091aa0e97a	otu781	D_0__Bacteria;D_1__Kiritimatiellaeota;D_2__Kiritimatiellae;D_3__WCHB1-41;D_4__uncultured organism;D_5__uncultured organism;D_6__uncultured organism	2	0	0	0	8	5	8	0	0	0	0	0	0	0	0	13	0	0	0	0
14c42a82a5b989231a97ef238ff44f34	otu783	D_0__Bacteria	0	0	0	0	0	0	0	0	0	0	0	0	0	0	0	8	0	0	0	0
14d33a4edad126b374e6e98467a2fbae	otu784	D_0__Bacteria;D_1__Patescibacteria;D_2__Parcubacteria;D_3__Candidatus Kaiserbacteria	0	0	0	0	0	2	0	0	0	6	0	0	0	0	0	0	0	0	0	0
14deed04610520d49508fee15aa3c7c1	otu785	D_0__Bacteria;D_1__Kiritimatiellaeota;D_2__Kiritimatiellae;D_3__WCHB1-41;D_4__uncultured organism;D_5__uncultured organism;D_6__uncultured organism	0	0	0	12	42	3	12	24	36	29	53	90	0	0	0	15	0	0	0	0
14e085424535c7ef28a7ecd08927e02a	otu786	D_0__Bacteria	0	0	0	0	0	0	0	0	0	0	0	0	0	0	0	0	0	3	0	0
14f686b98a932e7e9d708ae165dc1d00	otu788	D_0__Archaea;D_1__Crenarchaeota;D_2__Bathyarchaeia;D_3__uncultured archaeon;D_4__uncultured archaeon;D_5__uncultured archaeon;D_6__uncultured archaeon	0	0	0	0	0	5	0	0	0	0	0	0	0	0	0	0	0	0	0	0
15152ba345ade1e70baadec7eb5fb3f3	otu789	D_0__Bacteria	0	0	0	0	0	0	0	0	0	0	0	0	0	16	0	0	0	0	0	0
151b62c95428ac0260180ef06f3dd2b1	otu790	D_0__Bacteria	0	0	0	0	0	0	0	0	21	0	0	0	0	0	0	0	0	0	0	0
1528d2cfd279a632ac232988ac896128	otu791	D_0__Bacteria;D_1__Kiritimatiellaeota;D_2__Kiritimatiellae;D_3__WCHB1-41	0	6	0	0	0	0	2	0	0	0	0	0	0	0	0	0	0	0	0	0
1528f9ecb15b68412d5ea0b91ff4c07a	otu792	D_0__Bacteria	0	31	0	0	0	0	0	0	0	0	0	0	0	0	0	0	0	0	0	0
152fbe0771f6b8b70f2006f7e87385cd	otu793	D_0__Bacteria;D_1__Firmicutes;D_2__Clostridia;D_3__Clostridiales;D_4__Syntrophomonadaceae;D_5__Candidatus Contubernalis;D_6__uncultured low G+C Gram-positive bacterium	0	0	0	0	73	160	119	10	25	9	12	49	40	21	42	72	0	12	13	7
1538ff5969ebede10e3d0adc60ce0207	otu794	D_0__Bacteria	2	0	0	0	0	0	0	0	0	0	0	0	0	0	0	0	0	0	0	0
1539f0978a10e7b6e8173cbec627d98c	otu795	D_0__Bacteria	0	0	0	0	0	0	0	4	0	0	0	0	0	0	0	0	0	0	0	0
153b38f33d6b379f321bb13878f39af4	otu796	D_0__Bacteria	6	0	0	0	0	0	0	0	0	0	0	0	0	0	0	0	0	0	0	0
153f2a4f7bc270564959a0e057526327	otu797	D_0__Bacteria;D_1__Kiritimatiellaeota;D_2__Kiritimatiellae;D_3__WCHB1-41	0	5	0	0	0	0	0	0	0	0	0	0	0	0	0	0	0	0	0	0
1543ddd7db450464f23c1222d2b33008	otu798	D_0__Bacteria;D_1__Planctomycetes;D_2__Planctomycetacia;D_3__Isosphaerales;D_4__Isosphaeraceae;D_5__uncultured;D_6__uncultured bacterium	0	0	0	0	0	0	0	0	0	0	0	0	0	0	0	0	6	0	0	0
1545f0789372d6ff7b70ce069b7eaecf	otu799	D_0__Bacteria	18	50	52	23	56	0	10	0	0	0	0	5	0	0	0	10	0	0	0	0
154cc2e91187cd898fef5f13bf07ef04	otu800	D_0__Bacteria	0	0	0	0	0	0	3	0	0	0	0	0	0	0	0	0	0	0	0	0
1557cb198fdd6ace6568a684a0b4fdc2	otu801	D_0__Bacteria	0	0	0	0	0	0	0	0	0	0	0	0	0	0	0	4	0	0	0	0
1563716a56fa38fb38a17d4d31e0f98c	otu802	D_0__Bacteria	0	0	0	0	0	0	0	0	0	3	0	0	0	0	0	0	0	0	0	0
156787ebd7df16690881e33636964bd7	otu803	D_0__Bacteria	0	0	14	0	0	0	0	0	0	0	0	0	0	0	0	0	0	0	0	0
15739423a10f6daf923d404c21333d9e	otu804	D_0__Archaea;D_1__Euryarchaeota;D_2__Halobacteria;D_3__Halobacteriales;D_4__uncultured;D_5__uncultured haloarchaeon;D_6__uncultured haloarchaeon	0	0	0	0	0	0	0	0	0	0	10	0	0	0	0	0	0	0	0	0
157b33f198341ac4e570c7bda7666d99	otu805	D_0__Bacteria;D_1__Planctomycetes;D_2__OM19;D_3__uncultured bacterium;D_4__uncultured bacterium;D_5__uncultured bacterium;D_6__uncultured bacterium	0	0	0	0	0	0	0	0	0	0	11	0	0	0	0	8	0	0	0	0
157e27ef7a786dda4092d5d11e02bbd8	otu806	D_0__Archaea;D_1__Euryarchaeota;D_2__Methanobacteria;D_3__Methanobacteriales;D_4__Methanobacteriaceae;D_5__Methanobrevibacter;	0	0	0	0	0	0	0	0	0	0	7	0	0	0	0	0	0	0	0	0
157e7d16c1948803fcdfe626d0f68c2e	otu807	D_0__Bacteria;D_1__Kiritimatiellaeota;D_2__Kiritimatiellae;D_3__WCHB1-41;D_4__uncultured organism;D_5__uncultured organism;D_6__uncultured organism	0	0	0	0	0	0	0	6	0	0	0	0	0	0	0	0	0	0	0	0
158862a08b3fb502d2ed8f64cfb98280	otu809	D_0__Archaea;D_1__Euryarchaeota;D_2__Halobacteria;D_3__Halobacteriales;D_4__uncultured;D_5__uncultured haloarchaeon;D_6__uncultured haloarchaeon	0	23	0	0	28	12	82	0	0	0	0	0	0	0	0	0	0	10	0	0
15928e0e5001fbdc31fbd9dd418ae782	otu811	D_0__Bacteria;D_1__Patescibacteria;D_2__Parcubacteria	202	87	142	25	12	301	105	111	0	29	5	0	0	0	0	0	0	0	0	0
15a304afcde7fb8ed320f51e43c6a2b4	otu812	D_0__Archaea;D_1__Euryarchaeota;D_2__Halobacteria;D_3__Halobacteriales;D_4__uncultured;D_5__uncultured haloarchaeon;D_6__uncultured haloarchaeon	0	0	0	0	0	0	9	0	0	0	0	0	11	0	0	0	28	19	27	9
15ad772758791a0b6fe8c4396fccdb10	otu813	D_0__Bacteria;D_1__Patescibacteria;D_2__Parcubacteria;D_3__uncultured bacterium;D_4__uncultured bacterium;D_5__uncultured bacterium;D_6__uncultured bacterium	21	43	36	6	18	0	15	24	5	0	0	0	3	0	0	50	0	0	0	0
15b57ec438eeabb5e5afbbdc69b6ad37	otu814	D_0__Bacteria	0	0	0	0	0	0	0	0	0	0	1	0	0	0	0	0	0	0	0	0
15bd72a446aa638cda9c497e67ee85ac	otu815	D_0__Archaea;D_1__Nanoarchaeaeota;D_2__Woesearchaeia	0	0	0	0	0	0	0	0	0	0	0	0	0	0	0	7	0	0	0	0
15bd767aab14b502af3d68abdc199922	otu816	D_0__Bacteria;D_1__Planctomycetes;D_2__Planctomycetacia;D_3__Pirellulales;D_4__Pirellulaceae;D_5__Pirellula;D_6__uncultured bacterium	33	138	144	98	521	0	321	60	0	0	0	0	0	91	0	373	0	0	0	0
15c29d0de229e60fb592de59c7d8b08b	otu817	D_0__Bacteria;D_1__Halanaerobiaeota;D_2__Halanaerobiia;D_3__Halanaerobiales;D_4__Halanaerobiaceae;D_5__Halanaerobium;D_6__uncultured low G+C Gram-positive bacterium	0	0	0	0	0	25	0	0	0	0	4	0	0	32	3	0	0	0	0	0
15cac5eae313f8aaecacac8c94c52265	otu818	D_0__Bacteria	0	0	0	0	0	0	0	0	0	0	0	0	0	0	0	0	0	10	19	0
15d63bd12572feb17151c9579f295aec	otu820	D_0__Archaea;D_1__Thaumarchaeota;D_2__Nitrososphaeria;D_3__Nitrososphaerales;D_4__Nitrososphaeraceae;D_5__Candidatus Nitrososphaera;	0	0	0	0	0	0	0	0	0	0	0	0	0	0	11	0	21	0	8	0
15dd0661db50061002e63631b18dde70	otu821	D_0__Archaea;D_1__Nanoarchaeaeota;D_2__Nanohaloarchaeia;D_3__Nanohaloarchaeales;D_4__Nanohaloarchaeaceae;D_5__Candidatus Nanosalinarum;	0	0	0	0	0	0	0	0	0	7	14	0	0	0	0	0	0	0	0	0
15dee311ec09e5c4c9202d97913e0264	otu822	D_0__Bacteria	0	6	0	0	0	0	63	0	0	0	0	0	0	0	0	0	0	0	0	0
15e7ddf0f7273d711d211d4d906ae459	otu823	D_0__Bacteria	0	0	0	0	0	0	9	0	0	0	0	0	0	0	0	0	0	0	0	0
15ea68c16671cdf90a825868eebf087e	otu824	D_0__Bacteria	0	0	0	0	0	0	0	0	0	0	0	0	0	0	0	0	0	0	2	0
15ec0ca1599d6e1fc9279af89986bce4	otu825	D_0__Archaea;D_1__Euryarchaeota;D_2__Halobacteria;D_3__Halobacteriales;D_4__uncultured;D_5__uncultured haloarchaeon;D_6__uncultured haloarchaeon	0	0	0	0	0	14	4	0	0	0	0	0	0	0	0	0	0	0	0	0
15f3234ae9e4a849e2290f553c522ea1	otu826	D_0__Bacteria	0	0	0	0	0	0	0	60	0	0	0	0	0	0	0	0	0	0	0	0
15fcb72234ff85036ad69307d8292577	otu827	D_0__Bacteria;D_1__Firmicutes;D_2__Clostridia;D_3__Clostridiales;D_4__Syntrophomonadaceae;D_5__uncultured;	0	0	0	0	0	0	0	0	0	0	0	4	0	0	14	0	0	0	0	0
1602490909480887d2a30c7b4fc11152	otu828	D_0__Bacteria;D_1__Planctomycetes;D_2__OM19;D_3__uncultured organism;D_4__uncultured organism;D_5__uncultured organism;D_6__uncultured organism	0	0	0	0	0	10	5	0	0	0	0	0	0	0	0	0	13	0	27	21
160517c2bb5026ae661a0df295f7bb80	otu829	D_0__Bacteria;D_1__Patescibacteria;D_2__Parcubacteria;D_3__Candidatus Campbellbacteria;D_4__microbial mat metagenome;D_5__microbial mat metagenome;D_6__microbial mat metagenome	0	0	0	0	0	0	0	0	0	0	0	13	0	0	0	0	0	0	0	0
1605185f5b2337995d2ee8ffeca5a781	otu830	D_0__Bacteria	0	0	0	0	0	0	0	0	0	0	0	12	0	0	0	3	0	0	0	0
1607f7163eafee043b653b2fdafa072f	otu831	D_0__Bacteria	0	0	0	0	0	0	0	0	0	0	0	0	0	0	24	0	0	0	0	0
160fbe566006e3d9f2969eadff12ccef	otu832	D_0__Bacteria	0	0	0	0	0	0	0	0	0	0	0	11	0	0	0	0	0	0	0	0
161209dc0479ba0a96aa97a242ca8e73	otu833	D_0__Archaea;D_1__Nanoarchaeaeota;D_2__Woesearchaeia	0	0	0	0	0	0	0	36	240	203	229	126	86	41	207	0	0	97	124	61
16195ee9cbb75c100e6af832ab36a1c2	otu834	D_0__Bacteria;D_1__Planctomycetes;D_2__OM19;D_3__uncultured bacterium;D_4__uncultured bacterium;D_5__uncultured bacterium;D_6__uncultured bacterium	2	0	0	35	0	0	0	0	0	0	0	0	0	0	0	50	0	0	0	0
161f5d9f3c44eb2575b42f2c51efef7c	otu835	D_0__Bacteria	0	0	0	0	2	0	0	0	0	0	0	0	0	0	0	0	0	0	0	0
162ffdc823015a6c87b2b145f52d7e5f	otu836	D_0__Bacteria	0	5	16	0	0	0	0	0	0	0	0	0	0	0	0	0	0	0	0	0
1651e53d18e3119bc61b1abb1ff20615	otu837	D_0__Bacteria;D_1__Firmicutes;D_2__Clostridia;D_3__Clostridiales;D_4__Syntrophomonadaceae	0	0	0	0	0	0	0	0	0	0	0	0	0	0	0	3	0	0	0	0
1652167516ee8e8b05e4de9e581d2ce5	otu838	D_0__Bacteria;D_1__Bacteroidetes;D_2__Rhodothermia;D_3__Balneolales;D_4__Balneolaceae;D_5__uncultured;D_6__uncultured forest soil bacterium	0	0	0	0	0	0	0	0	0	0	0	3	0	0	0	0	0	0	0	0
165484f1418309bdfc7b625bbba06180	otu839	D_0__Archaea;D_1__Euryarchaeota;D_2__Halobacteria;D_3__Halobacteriales;D_4__Haloferacaceae;D_5__uncultured;D_6__uncultured haloarchaeon	43	0	0	0	0	0	0	0	0	0	0	0	0	0	0	0	0	0	0	0
1656c331a9270434431593cd80defef8	otu840	D_0__Bacteria	0	0	0	0	0	0	1	0	0	0	0	0	0	0	0	0	0	0	0	0
16649eba32b8f31f30ed5805e45c201f	otu841	D_0__Bacteria	4	0	0	0	0	0	0	0	0	0	0	0	0	0	0	0	0	0	0	0
166695bb1f6dfa0554ba89439897810b	otu842	D_0__Archaea;D_1__Nanoarchaeaeota;D_2__Nanohaloarchaeia;D_3__Nanohaloarchaeales;D_4__Nanohaloarchaeaceae	0	0	0	0	0	0	0	0	0	0	0	0	0	0	0	4	0	0	0	0
166fda9943b8dc2f32cd90ca8be85f12	otu843	D_0__Bacteria;D_1__Planctomycetes;D_2__Planctomycetacia;D_3__Pirellulales;D_4__Pirellulaceae	0	0	0	0	9	0	0	0	0	0	0	0	0	0	0	0	0	0	0	0
1677b426b5e26f56f1a5fbc66720b479	otu844	D_0__Bacteria;D_1__Deinococcus-Thermus;D_2__Deinococci;D_3__Deinococcales;D_4__Trueperaceae;D_5__Truepera;D_6__uncultured bacterium	0	0	0	0	10	0	0	0	0	0	0	0	0	0	0	0	0	0	0	0
1677d9695fa5ec08851723b5027aea26	otu845	D_0__Bacteria	0	0	0	8	0	0	0	0	0	0	0	0	0	0	0	0	0	0	0	0
16819831697c96cbcfbfa449a4571563	otu846	D_0__Archaea;D_1__Thaumarchaeota;D_2__Nitrososphaeria;D_3__Nitrososphaerales;D_4__Nitrososphaeraceae;D_5__Candidatus Nitrososphaera;D_6__uncultured archaeon	0	0	0	0	0	0	0	0	0	0	7	0	0	0	0	0	0	0	0	0
1688b663a817661e0165e3e84adfb90d	otu847	D_0__Archaea;D_1__Nanoarchaeaeota;D_2__Woesearchaeia	0	0	0	0	33	0	10	0	0	0	0	0	0	0	0	0	0	0	0	0
168ac0e137829d72e979fcea575d9378	otu848	D_0__Archaea;D_1__Nanoarchaeaeota;D_2__Woesearchaeia	0	0	0	0	0	0	0	0	0	0	0	0	0	4	0	0	0	0	0	0
1699159c6da1c6ef735e9e128d8cc4a0	otu849	D_0__Archaea;D_1__Euryarchaeota;D_2__Halobacteria;D_3__Halobacteriales;D_4__Haloferacaceae;D_5__Halovenus;D_6__uncultured haloarchaeon	0	0	0	0	0	0	0	0	0	0	0	0	0	0	0	0	37	0	0	0
16a1f6233d6ab997d9486cd65b61bf64	otu851	D_0__Bacteria	0	0	0	0	0	34	0	0	0	0	0	0	0	0	0	0	0	0	0	0
16a9a68f8c670d184d365ecfaa2b80b3	otu852	D_0__Bacteria	0	0	0	2	0	0	0	0	0	0	0	0	0	0	0	0	0	0	0	0
16aa32d9ad64248ba5ee744996e3e6c4	otu853	D_0__Bacteria	0	0	0	0	0	0	0	1	0	0	0	0	0	0	0	0	0	0	0	0
16ac790a86dabed2e04c6f0123a151dd	otu854	D_0__Bacteria	0	0	0	0	2	0	0	0	0	0	0	0	0	0	0	0	0	0	0	0
16b173092a599d7bc00ac256b365ae13	otu855	D_0__Bacteria;D_1__Verrucomicrobia;D_2__Verrucomicrobiae;D_3__Verrucomicrobiales;D_4__Rubritaleaceae;D_5__Luteolibacter;	0	3	0	0	66	0	26	126	0	0	0	0	0	0	0	0	0	0	0	0
16b4222a58960430a5d8931d51123dc8	otu856	D_0__Bacteria;D_1__Planctomycetes;D_2__Planctomycetacia;D_3__Pirellulales;D_4__Pirellulaceae;D_5__uncultured;	0	0	7	0	9	0	0	0	0	0	0	0	0	0	0	0	0	0	0	0
16be05466fc9230c568ab9fa32b40f7a	otu857	D_0__Bacteria	0	0	0	0	0	0	0	0	0	0	0	0	0	0	0	0	0	9	0	0
16c77bf622c10df7a906504fed3155f5	otu858	D_0__Bacteria;D_1__Gemmatimonadetes;D_2__BD2-11 terrestrial group;D_3__uncultured bacterium;D_4__uncultured bacterium;D_5__uncultured bacterium;D_6__uncultured bacterium	5	0	4	0	0	0	0	0	0	0	0	0	0	0	0	0	0	0	0	0
16d6bf2b1cc0a1e4c1f8d17b3aca3bcc	otu860	D_0__Bacteria	0	0	0	0	0	0	0	6	0	0	0	0	0	0	0	0	0	0	0	0
16e336ed27af04efe000528f3b528dd1	otu861	D_0__Archaea;D_1__Nanoarchaeaeota;D_2__Woesearchaeia;D_3__uncultured archaeon;D_4__uncultured archaeon;D_5__uncultured archaeon;D_6__uncultured archaeon	0	0	0	0	56	0	18	0	5	0	0	0	129	0	12	24	0	0	0	0
16e9d19b58440c55d13fffd598970c61	otu862	D_0__Bacteria;D_1__Kiritimatiellaeota;D_2__Kiritimatiellae;D_3__WCHB1-41	4	0	0	0	0	0	0	0	0	0	0	0	0	0	0	2	0	0	0	0
16f1ceba6ee1b2a09d2a3a5f54b7fbc9	otu863	D_0__Bacteria	0	0	0	0	0	0	0	0	0	0	0	0	0	0	0	6	0	0	0	0
16f3b223aaeb95ec803eb9aff5ba77a1	otu864	D_0__Bacteria	0	0	0	0	0	0	0	0	0	0	0	0	0	0	0	0	0	6	0	0
17074348af17cac19c9b0ee6864fe71a	otu865	D_0__Archaea;D_1__Euryarchaeota;D_2__Halobacteria;D_3__Halobacteriales;D_4__Haloferacaceae;D_5__Salinarchaeum;	0	0	0	0	0	0	0	0	0	0	0	0	0	0	0	0	12	0	0	0
17154a61cc8a6a7a0c581cb71ecb8ba8	otu866	D_0__Bacteria;D_1__FBP	0	0	0	0	0	0	0	0	0	0	13	0	0	0	0	0	0	0	0	0
171cc4c896f854fc8bf77e7ce38075ff	otu867	D_0__Bacteria;D_1__Proteobacteria;D_2__Alphaproteobacteria;D_3__Rickettsiales;D_4__Mitochondria	0	0	0	0	0	0	0	0	0	0	0	0	7	0	0	0	0	0	0	0
172beae29f42beb0664c6adce9046833	otu868	D_0__Bacteria;D_1__Omnitrophicaeota;D_2__uncultured bacterium;D_3__uncultured bacterium;D_4__uncultured bacterium;D_5__uncultured bacterium;D_6__uncultured bacterium	0	32	16	166	0	0	0	0	1	0	0	0	0	0	0	0	0	0	0	0
17313f81aad86ed1936684f033dadb34	otu869	D_0__Archaea;D_1__Euryarchaeota;D_2__Halobacteria;D_3__Halobacteriales;D_4__Halomicrobiaceae;D_5__Natronomonas;	172	19	11	27	30	27	13	30	15	5	4	75	0	13	28	0	6	488	132	224
173b319a7c3a57ed6adaaf33fbfb6817	otu870	D_0__Bacteria	0	0	0	0	0	0	0	0	0	0	0	0	0	0	0	4	0	0	0	0
17493fc2301e83da827b5a1458e476b2	otu871	D_0__Bacteria	0	0	0	0	4	0	0	0	0	0	0	0	0	0	0	0	0	0	0	0
174e3c79b6fc67586c84d3505eb28787	otu872	D_0__Archaea;D_1__Euryarchaeota;D_2__Halobacteria;D_3__Halobacteriales;D_4__Haloferacaceae;D_5__Halohasta;D_6__uncultured archaeon	13	4	9	12	0	8	3	8	338	10	105	30	283	109	303	0	38	50	83	51
17588381b8839412ef5d73c6a38b81d1	otu873	D_0__Bacteria	0	0	0	0	0	0	11	0	0	0	0	0	0	0	0	0	0	0	0	0
17622170c37d96a91575f5fde77dc936	otu874	D_0__Bacteria;D_1__Cyanobacteria;D_2__Oxyphotobacteria;D_3__Chloroplast	0	0	0	0	0	0	0	0	0	0	0	0	0	0	0	9	0	0	0	0
1772b9bf7eb48b35681d71b926c5778a	otu875	D_0__Bacteria	0	0	0	0	0	10	3	0	0	0	0	0	0	0	0	0	0	0	0	0
1791213c6e43d49d9f926f4a0b94cf8b	otu876	D_0__Bacteria	0	0	0	0	2	0	0	0	0	0	0	0	0	0	0	0	0	0	0	0
17976d1ff26ac35db1a4f24b9f3fa694	otu877	D_0__Bacteria;D_1__Patescibacteria	0	0	0	0	0	0	0	0	8	0	0	17	0	0	0	0	0	0	0	0
179d82e174fcbdb7eac11700387aaf6c	otu878	D_0__Bacteria	0	0	0	0	0	0	0	0	0	0	0	12	0	0	0	0	0	0	0	0
17aa8bba09d3f48a57f88ffc339d5930	otu879	D_0__Bacteria	0	7	4	0	0	0	0	0	0	0	0	0	0	0	0	0	0	0	0	0
17b927f05016cd3d74cacc161771e093	otu880	D_0__Archaea;D_1__Euryarchaeota;D_2__Halobacteria;D_3__Halobacteriales;D_4__Haloferacaceae;D_5__uncultured;D_6__uncultured haloarchaeon	0	0	0	0	0	0	0	0	0	0	0	0	0	0	5	0	0	0	0	0
17bb530daff9a81f1ce7474626af4774	otu881	D_0__Archaea;D_1__Euryarchaeota;D_2__Thermoplasmata;D_3__uncultured;D_4__uncultured archaeon;D_5__uncultured archaeon;D_6__uncultured archaeon	0	0	0	0	0	75	66	0	112	876	1048	260	113	769	323	0	2737	807	1236	1408
17bf90408886e78d8168fa51745385ca	otu882	D_0__Archaea;D_1__Euryarchaeota;D_2__Halobacteria;D_3__Halobacteriales;D_4__Haloferacaceae	75	65	24	63	14	16	0	0	0	0	0	16	0	0	0	0	54	0	10	0
17c018edffdf2c35f9ea01ec29099660	otu883	D_0__Bacteria;D_1__Patescibacteria;D_2__Parcubacteria	0	0	0	0	0	0	0	18	391	189	119	143	645	45	351	0	0	144	107	141
17e2f476611320ded8ac3ed96bf1e281	otu884	D_0__Bacteria	0	0	0	0	0	0	0	0	0	0	0	0	0	0	0	0	0	0	0	26
17f52ca6fbbd6b7ae49a293b54afac20	otu885	D_0__Bacteria	0	0	0	0	0	0	0	0	0	0	0	12	0	4	0	19	0	0	0	0
17f85f1cecde24fdffc3d1edc6f3e60b	otu886	D_0__Bacteria;D_1__Omnitrophicaeota;D_2__uncultured bacterium;D_3__uncultured bacterium;D_4__uncultured bacterium;D_5__uncultured bacterium;D_6__uncultured bacterium	0	119	47	207	73	0	36	2	0	0	0	0	0	0	0	451	0	0	0	0
17fd6cdc68aa3863ead723be35536571	otu887	D_0__Bacteria	0	0	0	0	0	0	0	0	0	0	0	0	9	0	0	0	0	0	0	0
17fe2aafa7f7e1d2b29e0a1ebb662f9b	otu888	D_0__Bacteria;D_1__Verrucomicrobia;D_2__Verrucomicrobiae;D_3__Verrucomicrobiales;D_4__Rubritaleaceae;D_5__Luteolibacter;	0	6	7	0	3	0	0	0	0	0	0	0	0	0	0	0	0	0	0	0
17fef8b653d928387c9955c64bebaaa6	otu889	D_0__Bacteria	0	0	0	0	0	0	0	0	6	0	0	0	0	0	0	0	0	0	0	0
1803c4594919af578cd52e82890c3755	otu890	D_0__Bacteria;D_1__Chlamydiae;D_2__LD1-PA32;D_3__uncultured bacterium;D_4__uncultured bacterium;D_5__uncultured bacterium;D_6__uncultured bacterium	0	0	0	0	0	0	0	4	0	0	0	0	0	0	0	0	0	0	0	0
180798cbbc94f53a0748196bae9e9c0d	otu891	D_0__Bacteria	0	0	0	0	0	0	0	0	0	0	0	0	0	0	0	0	0	0	1	0
180c6824da674c8dbc647e0ad35c54f5	otu892	D_0__Bacteria;D_1__Bacteroidetes;D_2__Bacteroidia;D_3__Bacteroidales;D_4__ML635J-4 aquatic group;D_5__uncultured Bacteroidetes bacterium;D_6__uncultured Bacteroidetes bacterium	0	0	0	0	0	0	0	0	0	32	39	0	0	0	0	0	0	0	0	0
1812e4ec229da7b09286df08dd346413	otu893	D_0__Bacteria	0	0	0	0	0	0	0	0	5	0	0	0	0	0	0	0	0	0	0	0
1818eb9f44bce694baa5ea3e718bcf6f	otu894	D_0__Bacteria	0	0	1	0	0	0	0	0	0	0	0	0	0	0	0	0	0	0	0	0
181b701cdee09e89c5246f20495c1fb5	otu895	D_0__Bacteria	0	0	9	0	0	0	0	0	0	0	0	0	0	0	0	0	0	0	0	0
182834d417adb73ab0fd9f1ac6387401	otu896	D_0__Bacteria;D_1__Firmicutes;D_2__Clostridia;D_3__M55-D21;D_4__uncultured prokaryote;D_5__uncultured prokaryote;D_6__uncultured prokaryote	0	0	0	0	0	0	0	0	0	0	0	0	0	0	0	0	0	0	1	0
18287197c7455e7525bcbba2cb63daf9	otu897	D_0__Bacteria	0	0	0	0	0	0	0	0	0	3	6	0	0	0	0	0	0	0	0	0
1831b9d3bb95d19f19438e05e564bcdb	otu898	D_0__Bacteria	0	0	0	0	0	0	0	0	0	0	0	0	0	5	0	0	0	0	0	0
1831d6c3bc88831be0f50bc7948ec305	otu899	D_0__Bacteria;D_1__Firmicutes;D_2__Clostridia;D_3__Clostridiales;D_4__Peptostreptococcaceae;D_5__Tepidibacter;	11	8	0	0	0	0	0	0	0	0	0	0	0	0	0	0	0	0	3	4
183eb6b979d2bac04bd06e697ede18ad	otu900	D_0__Bacteria	0	0	0	0	0	0	0	0	0	0	0	0	0	0	3	0	0	0	0	0
1845f7193bbe1fbf0252534609d03bfe	otu901	D_0__Bacteria	0	0	0	0	0	0	0	0	0	0	0	0	0	0	3	0	0	0	0	0
184ea41a9098a7160abe9ec479c552b3	otu902	D_0__Archaea;D_1__Euryarchaeota;D_2__Halobacteria;D_3__Halobacteriales;D_4__Haloferacaceae;D_5__Natrialba;	308	0	0	0	0	0	0	0	0	0	0	0	0	0	0	0	0	0	0	0
187101fafb50ceb4fd95e0c7634bc790	otu903	D_0__Bacteria;D_1__Patescibacteria;D_2__Parcubacteria;D_3__Candidatus Campbellbacteria;D_4__microbial mat metagenome;D_5__microbial mat metagenome;D_6__microbial mat metagenome	0	0	0	0	0	0	9	0	0	0	0	0	0	0	0	0	0	0	0	0
18733d085b7359c1de93acff7de5bf43	otu904	D_0__Bacteria	0	0	0	0	0	0	0	0	0	0	0	2	0	0	0	0	0	0	0	0
187f5e0e6820341a36ee01a7af8fa12e	otu905	D_0__Archaea;D_1__Euryarchaeota;D_2__Thermoplasmata;D_3__uncultured;D_4__uncultured archaeon;D_5__uncultured archaeon;D_6__uncultured archaeon	0	0	0	0	0	3	0	0	0	0	0	0	0	0	0	0	0	0	0	0
187fbf6d7c2ca52865d0d2aa6b0f762c	otu906	D_0__Bacteria	0	0	0	0	0	0	0	0	0	0	0	0	0	0	0	0	0	4	3	0
18826d721ad2e4ebbb6b840c4c98ad2f	otu907	D_0__Bacteria	0	0	0	0	0	0	0	0	0	0	0	0	4	0	0	0	0	0	0	0
1893f91996a3f4bd3642181b7aacce0c	otu908	D_0__Bacteria	0	0	0	0	0	0	0	0	0	0	0	0	0	12	0	0	0	0	0	0
189bb4f8db1cf5d6f3a9715743c12a02	otu909	D_0__Bacteria	0	0	0	0	0	0	0	0	0	0	0	0	0	0	0	0	0	0	0	2
18a1f4bafdddacb880631db0572963e0	otu910	D_0__Bacteria;D_1__Bacteroidetes;D_2__Bacteroidia;D_3__Flavobacteriales;D_4__Weeksellaceae;D_5__Chryseobacterium;	0	0	0	0	0	0	0	7	0	0	0	0	0	0	0	0	0	0	0	0
18afca9764d1139b262c141a6d9c502a	otu911	D_0__Archaea;D_1__Euryarchaeota;D_2__Halobacteria;D_3__Halobacteriales;D_4__Haloferacaceae	0	0	0	0	0	0	0	0	0	0	0	14	0	4	0	0	0	0	0	0
18b65e760ffae3264ca226df96a1ee2a	otu912	D_0__Bacteria;D_1__Proteobacteria;D_2__Alphaproteobacteria;D_3__Rickettsiales;D_4__Mitochondria	0	0	16	0	14	0	0	0	0	0	0	0	0	0	0	0	0	0	0	0
18d3da7fb061f98c2dac6c78d96cdb1d	otu913	D_0__Archaea;D_1__Euryarchaeota;D_2__Halobacteria;D_3__Halobacteriales;D_4__uncultured;D_5__uncultured haloarchaeon;D_6__uncultured haloarchaeon	0	0	0	0	9	0	0	0	0	0	0	0	0	0	0	0	0	0	0	0
18d9b60ada2c7d0062bd1f70032244ff	otu914	D_0__Bacteria;D_1__Firmicutes;D_2__Clostridia;D_3__Clostridiales;D_4__Syntrophomonadaceae;D_5__Candidatus Contubernalis;D_6__uncultured low G+C Gram-positive bacterium	0	0	0	0	0	0	0	0	0	0	14	0	0	0	0	0	0	0	0	0
18da6e436c07a8ac312c8e8e5b0c22ed	otu915	D_0__Archaea;D_1__Euryarchaeota;D_2__Halobacteria;D_3__Halobacteriales	0	0	0	0	0	0	0	0	0	0	0	0	0	0	3	12	0	0	0	0
18dada963932d53c67e3ab6d06880b0b	otu916	D_0__Bacteria	0	0	0	0	0	0	0	0	0	0	0	0	0	0	0	0	0	0	14	0
18e13da2c3446efda13a365607d2eb20	otu917	D_0__Bacteria	1	0	0	0	0	0	0	0	0	0	0	0	0	0	0	0	0	0	0	0
18e4c8960784246c37ae3456bf04c777	otu918	D_0__Bacteria	0	7	0	7	0	8	0	0	0	0	0	0	0	0	0	3	0	0	0	0
18e896f7b938755ea39f892c77436c10	otu919	D_0__Bacteria;D_1__Bacteroidetes;D_2__Bacteroidia	0	0	0	0	0	0	0	0	0	0	0	0	0	0	0	2	0	0	0	0
18f85238ffb7ce8d2b9a8bb1b85363f8	otu920	D_0__Bacteria	0	0	0	0	0	0	4	0	0	0	0	0	0	0	0	0	0	0	0	0
19025270b10d494e10beeb934a5e1d46	otu921	D_0__Bacteria	0	0	0	0	0	0	0	0	0	0	6	0	0	0	0	0	0	0	0	0
190902ad2108255e298dfbceaf5e6cf2	otu922	D_0__Bacteria	0	0	0	0	0	0	0	0	0	0	0	0	0	0	0	0	0	34	0	0
19103fdca9b785ff80c7195a77f7e736	otu923	D_0__Bacteria	0	0	0	0	0	0	0	0	0	4	0	0	0	0	0	0	0	0	0	0
1912b7485dbdbb2a0c7e6c4b87078420	otu924	D_0__Archaea;D_1__Euryarchaeota;D_2__Halobacteria;D_3__Halobacteriales;D_4__uncultured;D_5__uncultured haloarchaeon;D_6__uncultured haloarchaeon	0	11	0	0	28	52	0	0	0	0	0	0	0	0	0	0	0	0	0	0
191b170fd693f67a32e73eebb611c1b7	otu925	D_0__Bacteria;D_1__Omnitrophicaeota;D_2__uncultured Omnitrophica bacterium;D_3__uncultured Omnitrophica bacterium;D_4__uncultured Omnitrophica bacterium;D_5__uncultured Omnitrophica bacterium;D_6__uncultured Omnitrophica bacterium	12	0	0	0	0	8	0	300	0	139	84	0	69	14	100	0	0	0	0	0
191c01bf2e5ab61b8fda5613f2d369f1	otu926	D_0__Bacteria;D_1__Chlamydiae;D_2__LD1-PA32;D_3__metagenome;D_4__metagenome;D_5__metagenome;D_6__metagenome	3	0	0	0	0	0	0	0	0	0	0	0	0	0	0	0	0	0	0	0
19282428574a15dc3b1b931c105ace85	otu927	D_0__Bacteria;D_1__Bacteroidetes;D_2__Rhodothermia;D_3__Balneolales;D_4__Balneolaceae	17	52	45	27	38	0	38	16	0	0	0	41	2	13	17	19	0	0	7	0
1928a3e589a0bf1c1cfe53560cee46e0	otu928	D_0__Bacteria	0	0	0	0	0	0	0	0	5	0	0	0	0	0	0	0	0	0	0	0
1929b8ee60b9cd91dd2796bf570993d2	otu929	D_0__Bacteria	0	0	0	0	0	0	0	0	0	0	0	0	0	0	0	38	0	0	0	0
192bfa94f7c27cedfba56657a206adb3	otu930	D_0__Bacteria;D_1__Patescibacteria;D_2__Parcubacteria;D_3__uncultured bacterium;D_4__uncultured bacterium;D_5__uncultured bacterium;D_6__uncultured bacterium	31	18	5	0	44	982	338	38	383	1280	792	1638	1045	552	748	0	3930	211	1144	626
192fbdb011e03968ad83976fc5ab3b3d	otu931	D_0__Bacteria;D_1__Lentisphaerae	4	38	26	13	39	0	16	28	0	0	0	7	0	0	0	0	0	0	0	0
1930a3bd31e133cc0794b6f297e9b5b3	otu932	D_0__Bacteria	0	0	0	4	0	0	0	0	0	0	0	0	0	0	0	0	0	0	0	0
1934cca5c9b51fc75e6558da074617e9	otu933	D_0__Bacteria	0	0	0	0	0	0	0	0	0	0	0	1	0	0	0	5	0	0	0	0
1957c87b60efebdd8cd9655c519706d2	otu934	D_0__Archaea;D_1__Euryarchaeota;D_2__Halobacteria;D_3__Halobacteriales;D_4__uncultured;D_5__uncultured haloarchaeon;D_6__uncultured haloarchaeon	0	0	0	19	34	129	126	38	0	31	44	26	56	0	30	43	253	151	306	192
195b6e9283d40284b18ce06cad62b467	otu935	D_0__Bacteria	0	0	7	0	0	0	0	0	0	0	0	0	0	0	0	0	0	0	0	0
195e9582288eb586838a691994927c30	otu936	D_0__Bacteria;D_1__Patescibacteria;D_2__Parcubacteria	0	0	0	0	4	0	0	0	0	0	0	0	0	0	0	0	0	0	0	0
196a883410491ccf2ae3fb94174bffee	otu937	D_0__Bacteria	0	0	13	0	0	0	0	0	0	0	0	0	0	0	0	0	0	0	0	0
1976e79510a917e3dd22a868a1b8a1af	otu938	D_0__Archaea;D_1__Nanoarchaeaeota;D_2__Nanohaloarchaeia;D_3__Nanohaloarchaeales;D_4__Nanohaloarchaeaceae;D_5__soda lake metagenome;D_6__soda lake metagenome	8	2	0	18	0	9	0	9	0	0	0	0	0	0	0	0	0	0	0	0
198166e6397844f5193f135eb0ae1db7	otu939	D_0__Bacteria	0	0	0	0	0	0	0	0	0	0	0	0	0	0	0	0	0	9	0	0
198493dfca3544a34a9dc1972b33fe3a	otu940	D_0__Bacteria	0	0	6	0	0	0	0	0	0	0	0	0	0	0	0	0	0	0	0	0
19937abc08f72f1d7c87531138db9c36	otu941	D_0__Archaea;D_1__Nanoarchaeaeota;D_2__Nanohaloarchaeia;D_3__Nanohaloarchaeales;D_4__Nanohaloarchaeaceae;D_5__uncultured haloarchaeon MSP41;D_6__uncultured haloarchaeon MSP41	0	0	0	0	0	0	0	0	0	0	0	0	0	0	0	0	36	41	51	0
199b2d92851633944cbbbaed01998241	otu942	D_0__Bacteria	0	0	0	0	0	0	0	0	0	0	0	0	0	0	0	0	0	3	0	0
199f6e525c95878fd2d1f43773b9556e	otu943	D_0__Bacteria	0	0	0	14	0	0	0	0	0	0	0	0	0	0	0	15	0	0	0	0
19a3e27e91eaa9ebecf3b8e27f2e4ccf	otu944	D_0__Bacteria;D_1__Planctomycetes;D_2__OM19	0	5	0	2	0	0	0	0	9	0	0	4	0	0	0	0	0	0	0	0
19ab45a282be717acda031f28abd43ab	otu945	D_0__Bacteria	0	0	0	0	0	4	0	0	0	0	0	0	0	0	0	0	0	0	0	0
19ad639014c256d672c8ed1942aa99d7	otu946	D_0__Archaea;D_1__Euryarchaeota;D_2__Halobacteria;D_3__Halobacteriales;D_4__Haloferacaceae;D_5__Halobiforma;D_6__Halobiforma sp. BNMIITR	0	0	0	0	0	0	0	0	0	4	6	0	0	0	0	0	8	3	0	0
19bd79430aa2ae2fc48a0bb8beb6343a	otu947	D_0__Bacteria	0	0	0	0	5	0	0	0	0	0	0	0	0	0	0	0	0	0	0	0
19c458fae2fa6be85ada09d93a4b0cd4	otu948	D_0__Bacteria	2	0	0	0	0	0	0	0	0	0	0	0	0	0	0	0	0	0	0	0
19c47ba55ee5c3668a96e13395172b44	otu949	D_0__Bacteria;D_1__Proteobacteria;D_2__Deltaproteobacteria;D_3__Bradymonadales;D_4__Bradymonadaceae	0	0	0	0	0	0	0	0	0	0	0	0	0	0	0	0	0	6	0	0
19cda437e8734650e843b783d30a75cc	otu950	D_0__Bacteria;D_1__Bacteroidetes;D_2__Bacteroidia;D_3__Sphingobacteriales;D_4__CMW-169;D_5__uncultured bacterium;D_6__uncultured bacterium	5	0	0	0	2	0	0	0	0	0	0	0	0	0	0	0	0	0	0	0
19cfbfacde01d596f5d21e86a09e3a2f	otu951	D_0__Bacteria	0	0	0	0	8	0	0	0	0	0	0	0	0	0	0	0	0	0	0	0
19d1ea63d53175ef8c95fe1fa767e3c8	otu952	D_0__Archaea;D_1__Euryarchaeota;D_2__Halobacteria;D_3__Halobacteriales;D_4__Haloferacaceae;D_5__uncultured;	0	0	11	0	0	0	0	0	0	0	0	0	1	0	10	0	0	0	0	7
19d378701c8ba33445e8cabae187109c	otu953	D_0__Bacteria;D_1__Omnitrophicaeota;D_2__uncultured bacterium;D_3__uncultured bacterium;D_4__uncultured bacterium;D_5__uncultured bacterium;D_6__uncultured bacterium	0	0	0	0	0	0	5	0	0	0	0	0	0	0	0	0	0	0	0	0
19db81e713e4ab568544f2a0cdc04d16	otu954	D_0__Bacteria	0	0	0	0	0	0	0	0	0	0	0	0	0	1	0	0	0	0	0	0
19e1e8b5eb707b4eb9821b700c4f6786	otu955	D_0__Archaea;D_1__Euryarchaeota;D_2__Halobacteria;D_3__Halobacteriales;D_4__uncultured;D_5__uncultured haloarchaeon;D_6__uncultured haloarchaeon	0	0	0	0	1	0	0	0	0	0	0	0	0	0	0	0	0	0	0	0
19ec4c54bc23d7e746e94840d6230953	otu956	D_0__Bacteria	0	0	0	0	0	0	0	0	0	0	0	0	0	0	5	0	0	0	0	0
19f25e48053a8933af3de7439ff5ab36	otu957	D_0__Bacteria;D_1__Kiritimatiellaeota;D_2__Kiritimatiellae;D_3__WCHB1-41;D_4__uncultured Verrucomicrobia bacterium;D_5__uncultured Verrucomicrobia bacterium;D_6__uncultured Verrucomicrobia bacterium	0	0	0	0	6	0	0	0	0	0	0	0	0	0	0	0	0	0	0	0
19fb5022748bf7eb1e9e1b7b8d5d3362	otu959	D_0__Bacteria	0	0	10	0	0	0	0	0	0	0	0	0	0	0	0	0	0	0	0	0
1a09864a508224f98491dd62bcc72136	otu960	D_0__Bacteria	0	0	0	0	4	0	0	0	0	0	0	0	0	0	0	0	0	0	0	0
1a161d73b8115aa4a50b3996c3362c38	otu961	D_0__Archaea;D_1__Euryarchaeota;D_2__Halobacteria;D_3__Halobacteriales;D_4__Haloferacaceae	0	0	0	0	0	0	0	0	5	0	0	0	0	0	0	0	0	0	0	0
1a163ed43e566c17450babe89d35abe5	otu962	D_0__Archaea;D_1__Nanoarchaeaeota;D_2__Nanohaloarchaeia	0	0	0	0	0	0	0	0	0	0	0	0	8	0	0	0	0	0	0	0
1a2706e491e99940b66db64b572a2eb5	otu963	D_0__Archaea;D_1__Nanoarchaeaeota;D_2__Woesearchaeia	0	0	0	0	0	5	0	31	0	0	0	0	0	0	0	0	0	0	0	0
1a2866f1d778d3333fd48ccbdd4f2341	otu964	D_0__Bacteria	0	0	0	0	0	0	0	0	0	0	0	6	0	0	0	0	0	0	0	0
1a2db0349d67db5170866481a0067296	otu965	D_0__Bacteria;D_1__Lentisphaerae;D_2__Oligosphaeria;D_3__Oligosphaerales;D_4__Oligosphaeraceae;D_5__SBZC-1223;D_6__uncultured organism	0	8	0	0	0	0	0	20	16	0	0	0	17	0	0	30	0	0	0	0
1a592a70b35dad5685bfdc1405db12a5	otu967	D_0__Bacteria;D_1__Cloacimonetes;D_2__Cloacimonadia;D_3__Cloacimonadales;D_4__MSBL8;D_5__uncultured bacterium;D_6__uncultured bacterium	0	0	0	3	0	0	0	0	0	0	0	0	0	0	0	0	0	0	0	0
1a5a8d9c014ba35de830c83c7a86f66c	otu968	D_0__Archaea;D_1__Euryarchaeota;D_2__Halobacteria;D_3__Halobacteriales;D_4__Haloferacaceae;D_5__uncultured;D_6__uncultured haloarchaeon	0	0	0	0	0	0	0	0	0	0	0	0	0	0	0	0	0	0	0	5
1a5bf61fb9fdc0b55f0a4d5eeadf21a1	otu969	D_0__Bacteria;D_1__Firmicutes;D_2__Clostridia;D_3__Clostridiales;D_4__Syntrophomonadaceae;D_5__uncultured;D_6__uncultured low G+C Gram-positive bacterium	0	0	0	0	13	35	27	0	26	13	14	53	24	37	45	47	30	0	12	0
1a7a5818d09b0ba6f446b3e1f1d82a10	otu970	D_0__Archaea;D_1__Nanoarchaeaeota;D_2__Woesearchaeia	0	0	0	0	0	0	0	0	1	0	0	0	0	0	0	0	0	0	0	0
1a80e8c2f73aff6afb62bbc9a0b8b2fd	otu971	D_0__Bacteria	0	0	0	0	0	0	0	0	0	0	0	1	0	2	0	0	0	0	0	0
1a9dd290762a6b63781a19f197001786	otu972	D_0__Archaea;D_1__Euryarchaeota;D_2__Halobacteria;D_3__Halobacteriales;D_4__Haloferacaceae;D_5__uncultured;	0	0	0	0	0	0	0	0	0	0	0	0	12	0	0	0	0	0	0	0
1ab70d7819c77e1048cea30af308aee0	otu973	D_0__Bacteria	0	0	0	0	0	0	2	0	30	0	0	0	0	0	1	0	0	0	0	0
1ab88cc2640893c8f34896d4a97d29b1	otu974	D_0__Bacteria	0	0	0	0	0	0	0	0	0	0	0	0	0	0	0	4	0	0	0	0
1ac5362941ed0c93d148c1eeb7360bb9	otu975	D_0__Archaea;D_1__Nanoarchaeaeota;D_2__Woesearchaeia;D_3__uncultured euryarchaeote;D_4__uncultured euryarchaeote;D_5__uncultured euryarchaeote;D_6__uncultured euryarchaeote	0	0	0	0	0	0	0	14	0	0	0	0	0	0	0	0	0	0	0	0
1ac977f33f61208c461879ab0c3b564c	otu976	D_0__Archaea;D_1__Euryarchaeota;D_2__Thermoplasmata;D_3__uncultured;D_4__uncultured archaeon;D_5__uncultured archaeon;D_6__uncultured archaeon	0	0	0	0	0	0	0	0	0	0	2	0	0	0	0	0	0	0	0	0
1aceff98f2112ebef8414f05d341759d	otu977	D_0__Archaea;D_1__Euryarchaeota;D_2__Halobacteria;D_3__Halobacteriales;D_4__Haloferacaceae;D_5__Salinarchaeum;D_6__uncultured haloarchaeon	0	0	0	0	0	0	0	0	0	0	0	0	0	0	0	0	1	0	0	0
1ad42ed065dc65d8249df0d4ac96714e	otu978	D_0__Bacteria;D_1__Firmicutes;D_2__Clostridia	0	0	0	0	0	0	0	0	0	0	0	0	0	0	0	0	0	0	7	0
1ad6296c159059fb9e84c8e5947a28ea	otu979	D_0__Bacteria	0	0	44	0	0	0	0	0	0	0	0	0	0	0	0	0	0	0	0	0
1ad81abbf8b7b2f41f7e2e165d37f1d0	otu980	D_0__Bacteria	0	0	0	0	0	0	7	0	0	0	0	0	0	0	0	0	0	0	0	0
1ae98d3f2c2c9384a2827d748e9d9068	otu981	D_0__Bacteria;D_1__Omnitrophicaeota;D_2__Candidatus Omnitrophus magneticus;D_3__Candidatus Omnitrophus magneticus;D_4__Candidatus Omnitrophus magneticus;D_5__Candidatus Omnitrophus magneticus;D_6__Candidatus Omnitrophus magneticus	52	15	27	153	0	0	0	0	0	0	0	0	0	0	0	0	0	0	0	0
1af0386519b9de0fa50fb9890eb06dce	otu982	D_0__Archaea;D_1__Nanoarchaeaeota;D_2__Woesearchaeia;D_3__uncultured archaeon;D_4__uncultured archaeon;D_5__uncultured archaeon;D_6__uncultured archaeon	0	33	3	94	0	0	0	0	0	0	0	0	0	0	0	0	0	0	0	0
1b05999ec383eb35b1f21eb71e9fb230	otu983	D_0__Bacteria	0	0	0	0	0	0	0	0	0	0	0	0	0	0	1	0	0	0	0	0
1b08604af63f5acab031ce8a64ce7cde	otu984	D_0__Bacteria;D_1__Firmicutes;D_2__Clostridia;D_3__M55-D21;D_4__uncultured prokaryote;D_5__uncultured prokaryote;D_6__uncultured prokaryote	0	0	0	0	0	0	0	0	0	0	5	0	0	0	0	0	0	0	0	0
1b0aa30b6bd9cbdf86da1f4864290eae	otu985	D_0__Bacteria;D_1__Firmicutes;D_2__Bacilli;D_3__Bacillales;D_4__Bacillaceae;D_5__Halobacillus;	9	0	0	0	0	7	2	0	0	0	0	0	0	0	0	0	0	4	0	0
1b0bf119a47e2f8a48b0d4b5c9e1e33e	otu986	D_0__Archaea;D_1__Nanoarchaeaeota;D_2__Woesearchaeia	0	0	0	0	8	0	0	4	0	0	0	0	0	0	0	0	0	0	0	0
1b1cc9452f2d0bfbee5d1935052e10c9	otu987	D_0__Bacteria	0	0	0	0	0	0	0	0	11	0	0	0	0	0	0	0	0	0	0	0
1b1cfd9260a48cb7fd075d357a910201	otu988	D_0__Bacteria	0	0	0	0	0	0	0	0	0	0	0	0	9	0	0	0	0	0	0	0
1b26759d0dbca81626487609e576b76b	otu989	D_0__Bacteria	0	0	0	0	0	0	0	0	0	0	0	0	5	0	0	0	0	0	0	0
1b267b8fef14e73d361821351ad07f63	otu990	D_0__Bacteria;D_1__Chloroflexi;D_2__Anaerolineae;D_3__SBR131;D_4__uncultured organism;D_5__uncultured organism;D_6__uncultured organism	0	0	0	5	0	0	4	0	0	0	0	0	0	0	0	0	0	0	0	0
1b2da61a8d00877c34cbe888bef28315	otu991	D_0__Bacteria	0	0	0	0	0	0	0	0	1	0	0	0	0	0	0	0	0	0	0	0
1b3351b726a043f55e58f86d75d178f8	otu992	D_0__Archaea;D_1__Euryarchaeota;D_2__Halobacteria;D_3__Halobacteriales;D_4__uncultured;D_5__uncultured haloarchaeon;D_6__uncultured haloarchaeon	63	84	91	45	75	32	61	30	0	0	0	0	0	0	0	3	0	0	0	0
1b3e7da104589cd8e5ff88589d53be44	otu993	D_0__Bacteria	0	0	0	0	0	0	0	0	0	0	0	9	0	27	0	0	0	0	0	0
1b415dd05d247f3409c2a20870ce5d91	otu994	D_0__Bacteria;D_1__Planctomycetes;D_2__Planctomycetacia;D_3__Pirellulales;D_4__Pirellulaceae;D_5__Pir4 lineage;D_6__uncultured organism	37	8	47	0	55	62	18	20	20	0	0	0	0	0	0	114	0	0	0	0
1b58e988577cb0f675d93cc105284c01	otu995	D_0__Bacteria;D_1__Kiritimatiellaeota;D_2__Kiritimatiellae;D_3__WCHB1-41;D_4__uncultured bacterium;D_5__uncultured bacterium;D_6__uncultured bacterium	0	0	0	0	0	0	4	0	0	0	0	0	0	0	0	0	0	0	0	0
1b5a479b2eb3b5d7c5c914ade5575e4f	otu996	D_0__Bacteria	0	0	0	0	0	0	0	0	0	0	0	0	0	0	6	0	0	0	0	0
1b6195bfe399ff482dedbbf818ac2b78	otu997	D_0__Bacteria;D_1__Proteobacteria;D_2__Gammaproteobacteria;D_3__Betaproteobacteriales;D_4__Neisseriaceae;D_5__Snodgrassella;	0	0	15	16	0	0	18	0	0	0	0	0	0	0	0	0	0	0	0	0
1b62631ae7ac5df11d48a9c3145ac51c	otu998	D_0__Bacteria;D_1__Planctomycetes;D_2__vadinHA49;D_3__uncultured organism;D_4__uncultured organism;D_5__uncultured organism;D_6__uncultured organism	158	67	35	0	196	131	194	30	45	15	13	92	61	0	26	308	0	0	0	0
1b6b789aa247cb2727bbb4b75721818f	otu999	D_0__Bacteria	0	0	0	0	2	0	0	0	0	0	0	0	0	0	0	0	0	0	0	0
1b741a7b4392689aab351425e7b0a920	otu1000	D_0__Bacteria	0	0	0	0	0	0	0	0	5	0	0	0	0	0	0	0	0	0	0	0
1b77160d28d35b0f95fcf8bb65772c89	otu1001	D_0__Bacteria;D_1__Planctomycetes;D_2__Planctomycetacia;D_3__Pirellulales;D_4__Pirellulaceae;D_5__Rubripirellula;D_6__uncultured bacterium	93	230	210	0	304	0	95	65	0	0	0	0	3	0	0	0	0	0	0	0
1b7f48a87929eac9e8c23265753dda02	otu1002	D_0__Bacteria	0	0	0	0	0	0	0	0	0	0	6	0	0	0	17	0	0	0	0	0
1b9d5c2d45ce8c67c8af18c3061c2eda	otu1004	D_0__Bacteria	0	0	0	0	0	0	0	0	0	0	0	0	0	16	0	0	0	0	0	0
1b9d7cd03382b9824d454fe1dd92c85a	otu1005	D_0__Archaea;D_1__Euryarchaeota;D_2__Halobacteria;D_3__Halobacteriales;D_4__Haloferacaceae	0	0	13	0	0	0	0	0	0	0	0	0	0	0	11	0	0	0	0	0
1ba20fdf73e56de2c08d88fe4a41d49c	otu1006	D_0__Archaea;D_1__Euryarchaeota;D_2__Halobacteria;D_3__Halobacteriales;D_4__Haloferacaceae;D_5__Halohasta;D_6__uncultured archaeon	0	0	0	0	0	90	0	0	19	0	0	38	0	39	10	0	16	0	0	0
1baed1bb61c7329e634783d50f64e4b3	otu1007	D_0__Archaea;D_1__Altiarchaeota;D_2__Altiarchaeia;D_3__uncultured archaeon;D_4__uncultured archaeon;D_5__uncultured archaeon;D_6__uncultured archaeon	0	0	0	0	0	0	0	52	0	0	0	0	0	0	0	0	0	0	0	0
1bb13669de3432ae2df208059420378d	otu1008	D_0__Bacteria	0	4	0	0	0	0	0	0	0	0	0	0	0	0	0	0	0	0	0	0
1bb4f5ea1af10a6946442b1c66579f12	otu1009	D_0__Bacteria;D_1__Cloacimonetes;D_2__Cloacimonadia;D_3__Cloacimonadales;D_4__MSBL8	0	5	0	0	0	0	0	0	0	0	0	0	0	0	0	0	0	0	0	0
1bb6cd92893576ab8ca4d13b07f91057	otu1010	D_0__Bacteria	0	0	0	7	0	0	0	0	0	0	0	0	0	0	0	0	0	0	0	0
1bd161f232ac03b269ad64da03b43c71	otu1011	D_0__Bacteria;D_1__Patescibacteria;D_2__Parcubacteria	0	0	0	0	0	0	0	0	0	0	0	0	0	45	0	0	0	0	0	0
1bd4f7ced72023774114b79e846be841	otu1012	D_0__Archaea;D_1__Nanoarchaeaeota;D_2__Woesearchaeia	0	0	0	0	0	0	0	0	0	0	0	0	0	0	0	90	0	0	0	0
1bd74e2e7a9da3875870b11b795a2236	otu1013	D_0__Archaea;D_1__Euryarchaeota;D_2__Halobacteria;D_3__Halobacteriales;D_4__Haloferacaceae;D_5__uncultured;D_6__uncultured haloarchaeon	0	0	0	0	0	0	8	0	0	0	0	0	0	0	0	0	0	0	0	0
1bd90d25ab8f9ff963bf0e9031d6f64b	otu1014	D_0__Archaea;D_1__Diapherotrites;D_2__Iainarchaeia;D_3__uncultured archaeon;D_4__uncultured archaeon;D_5__uncultured archaeon;D_6__uncultured archaeon	0	0	0	0	0	0	0	32	0	0	0	0	0	0	0	0	0	0	0	0
1bd9824f6e24975889b63afd4f1691c3	otu1015	D_0__Bacteria;D_1__Bacteroidetes;D_2__Ignavibacteria;D_3__Ignavibacteriales;D_4__BSN166;D_5__uncultured bacterium;D_6__uncultured bacterium	0	0	0	0	0	2	0	0	0	0	0	0	0	0	0	0	0	0	0	0
1be61d82ad7ffc323ceed25428b4abf0	otu1016	D_0__Bacteria;D_1__Omnitrophicaeota;D_2__uncultured Omnitrophica bacterium;D_3__uncultured Omnitrophica bacterium;D_4__uncultured Omnitrophica bacterium;D_5__uncultured Omnitrophica bacterium;D_6__uncultured Omnitrophica bacterium	0	13	7	7	0	11	7	6	0	1	0	0	0	0	0	0	0	0	0	0
1be71b6e757087173163c786a4b02b29	otu1017	D_0__Bacteria;D_1__Firmicutes;D_2__Clostridia;D_3__Clostridiales	24	0	0	9	0	0	0	0	5	0	0	0	4	0	0	0	0	0	0	0
1be7c5ea2c21fb6bde4f0b5441bcd26b	otu1018	D_0__Bacteria	0	0	0	0	0	0	0	0	2	0	0	0	0	0	0	0	0	0	0	0
1be8e4fbe69d4b4e4fccc9ee6cc01362	otu1019	D_0__Archaea;D_1__Diapherotrites;D_2__Iainarchaeia;D_3__uncultured archaeon;D_4__uncultured archaeon;D_5__uncultured archaeon;D_6__uncultured archaeon	23	60	45	34	84	62	97	20	95	1266	973	68	307	2156	860	8	5490	4167	4076	5617
1be9ddb10e40b176336ea79e0f7bf3f9	otu1020	D_0__Archaea;D_1__Euryarchaeota;D_2__Thermoplasmata;D_3__SG8-5;D_4__uncultured archaeon;D_5__uncultured archaeon;D_6__uncultured archaeon	0	0	1	47	0	0	0	0	0	0	0	0	0	0	0	0	0	0	0	0
1bf145daff916edf66e70a8b7e48840b	otu1021	D_0__Bacteria	0	2	0	0	0	0	0	0	0	0	0	0	0	0	0	0	0	0	0	0
1bf7672429006ae34438834ad80b03b9	otu1022	D_0__Bacteria;D_1__Planctomycetes;D_2__Planctomycetacia;D_3__Pirellulales;D_4__Pirellulaceae	12	0	0	0	0	0	0	13	0	0	0	22	0	0	0	0	0	0	0	0
1bfed700c97c78c9089835fd0b87bed6	otu1024	D_0__Bacteria	9	0	0	0	0	0	0	0	0	0	0	0	0	0	0	0	0	0	0	0
1c0e555b7bad4f0e84b415d1091dae4f	otu1025	D_0__Bacteria;D_1__Firmicutes;D_2__Clostridia;D_3__Clostridiales;D_4__Syntrophomonadaceae;D_5__uncultured;D_6__uncultured Firmicutes bacterium	28	0	0	0	0	33	0	4	0	0	0	0	15	2	5	6	0	0	6	0
1c147c5514ab44a468d5bd0b077c057d	otu1026	D_0__Archaea;D_1__Euryarchaeota;D_2__Halobacteria;D_3__Halobacteriales;D_4__Haloferacaceae;D_5__Natronorubrum;	0	0	0	0	0	0	0	0	0	0	0	12	0	0	0	0	0	0	0	0
1c14bb1cf20710d2cd5269c9d9ab05f6	otu1027	D_0__Archaea;D_1__Euryarchaeota;D_2__Halobacteria;D_3__Halobacteriales;D_4__Haloferacaceae;D_5__Halovenus;D_6__Halovenus aranensis	0	0	0	0	0	0	0	0	0	0	0	0	0	0	0	0	1	0	0	0
1c1630402f7f81556d81460031acaf5c	otu1028	D_0__Archaea;D_1__Euryarchaeota;D_2__Halobacteria;D_3__Halobacteriales;D_4__uncultured;D_5__uncultured haloarchaeon;D_6__uncultured haloarchaeon	0	0	0	0	24	0	0	0	0	0	0	0	0	0	0	0	0	0	0	0
1c174ef3745bf91b177e8313f97a9ad6	otu1029	D_0__Bacteria;D_1__Patescibacteria;D_2__Parcubacteria;D_3__Candidatus Yonathbacteria;D_4__uncultured bacterium;D_5__uncultured bacterium;D_6__uncultured bacterium	0	1	0	0	0	0	0	0	0	0	0	0	0	0	0	0	0	0	0	0
1c3af7debd1434e6c7d891dd60a1c3a3	otu1030	D_0__Bacteria;D_1__Firmicutes;D_2__Clostridia;D_3__Clostridiales;D_4__Syntrophomonadaceae;D_5__uncultured;D_6__uncultured Firmicutes bacterium	0	0	21	34	48	98	59	22	12	0	12	32	14	22	64	134	0	35	18	42
1c421dc9a3c8b3a7590196bf9d4e3cd8	otu1031	D_0__Bacteria;D_1__Planctomycetes;D_2__Planctomycetacia;D_3__Isosphaerales;D_4__Isosphaeraceae;D_5__uncultured;D_6__uncultured bacterium	0	0	0	2	0	0	0	0	0	0	0	0	0	0	0	0	0	0	0	0
1c4b1167ce33fce1777282773a068985	otu1032	D_0__Bacteria	0	0	0	0	0	0	0	0	0	2	0	0	0	0	0	0	0	0	0	0
1c51539333859256b8c8a59c1b51d9e1	otu1033	D_0__Bacteria	0	0	0	0	0	0	0	0	0	0	0	0	0	0	0	0	0	0	0	15
1c51d7c5d8874d41b2e38b3f4edb78d5	otu1034	D_0__Bacteria;D_1__Gemmatimonadetes;D_2__BD2-11 terrestrial group;D_3__uncultured forest soil bacterium;D_4__uncultured forest soil bacterium;D_5__uncultured forest soil bacterium;D_6__uncultured forest soil bacterium	0	0	0	0	0	0	0	0	0	0	0	0	0	0	0	65	0	0	0	0
1c54c43ddfdca4b11f6e821eac29b477	otu1035	D_0__Bacteria	0	0	0	0	0	0	0	0	0	0	0	2	0	0	0	0	0	0	0	0
1c62b9fc64c58e81189a929b776d21ab	otu1036	D_0__Bacteria;D_1__Patescibacteria;D_2__Parcubacteria	0	0	0	0	0	0	0	0	0	0	0	0	0	0	0	3	0	0	0	0
1c7646882ca4e73831fa8cb9f9e1dea7	otu1037	D_0__Archaea;D_1__Euryarchaeota;D_2__Methanomicrobia;D_3__Methanomicrobiales;D_4__Methanocorpusculaceae;D_5__Methanocalculus;	293	6	150	0	0	0	0	0	0	0	0	0	0	0	0	0	0	0	0	5
1c772ede0f8104378c21201f096d25e8	otu1038	D_0__Bacteria;D_1__Cyanobacteria;D_2__Oxyphotobacteria;D_3__Chloroplast	0	0	0	0	0	0	0	0	0	0	0	0	0	10	0	0	0	0	0	0
1c7c1f34f236c79a369ea48e68032a37	otu1039	D_0__Bacteria;D_1__Lentisphaerae;D_2__Oligosphaeria;D_3__Oligosphaerales;D_4__Oligosphaeraceae;D_5__uncultured Verrucomicrobia bacterium;D_6__uncultured Verrucomicrobia bacterium	1	0	0	0	0	0	0	0	0	0	0	0	0	0	0	0	0	0	0	0
1c880515efd5c6601fc502969d5a146a	otu1040	D_0__Archaea;D_1__Euryarchaeota;D_2__Halobacteria;D_3__Halobacteriales;D_4__Haloferacaceae;D_5__uncultured haloarchaeon;D_6__uncultured haloarchaeon	0	6	0	0	0	0	0	0	0	0	0	0	0	0	0	0	0	0	0	0
1c8903bcaec22651677d51e486a14632	otu1041	D_0__Archaea;D_1__Euryarchaeota;D_2__Halobacteria;D_3__Halobacteriales;D_4__Haloferacaceae;D_5__Natronorubrum;	0	0	0	0	0	0	0	0	16	0	24	0	0	0	0	17	4	8	0	0
1c8cd59ebfb2d20f26e902793b517ad8	otu1042	D_0__Bacteria	0	1	0	0	0	0	0	0	0	0	0	0	0	0	0	0	0	0	0	0
1c909d68356b4c3a82be85456c93925b	otu1043	D_0__Bacteria	0	4	0	0	0	0	0	0	0	0	0	0	0	0	0	0	0	0	0	0
1c9e49a7c45741a23442cba142cfb984	otu1044	D_0__Bacteria	0	0	6	0	0	0	0	0	0	0	0	0	0	0	0	0	0	0	0	0
1ca2c255df89e38e87cb5d6e520f1103	otu1045	D_0__Archaea;D_1__Nanoarchaeaeota;D_2__Woesearchaeia	0	0	0	0	0	0	0	0	13	23	10	23	0	0	0	0	0	0	0	0
1ca482ce7f11e98cf4568efc0c742430	otu1046	D_0__Bacteria	0	0	0	1	0	0	0	0	0	0	0	0	0	0	0	0	0	0	0	0
1ca494e5bc316c456ce87481e9e4a8d2	otu1047	D_0__Bacteria	1	0	0	0	0	0	0	0	0	0	0	0	0	0	0	0	0	0	0	0
1ca771b0cfb98d00c4214596c3b8051e	otu1048	D_0__Archaea;D_1__Euryarchaeota;D_2__Halobacteria;D_3__Halobacteriales;D_4__Haloferacaceae	235	0	0	0	0	0	0	0	0	0	0	0	0	0	0	0	0	0	0	0
1cb6d945dbf2aff0a2d03da20f2d4a45	otu1049	D_0__Bacteria	0	0	0	0	0	0	1	0	0	0	0	0	0	0	0	0	0	0	0	0
1cb8c0346142a92055a48d949454f537	otu1050	D_0__Bacteria	0	0	0	0	0	0	0	0	0	0	0	0	0	0	0	0	1	0	0	0
1cc229afb8fadeb62e76681cd029a758	otu1051	D_0__Archaea;D_1__Euryarchaeota;D_2__Halobacteria;D_3__Halobacteriales;D_4__Haloferacaceae;D_5__Halorubrum;	0	0	0	0	0	0	0	0	0	0	0	0	0	0	2	0	0	0	0	0
1cd056bedf102a0d22ce5cf38c2997f8	otu1052	D_0__Bacteria;D_1__Bacteroidetes;D_2__Bacteroidia;D_3__Bacteroidales	0	0	0	0	0	0	0	0	0	0	0	0	0	0	0	2	0	0	0	0
1cd1e7e293fcaef3ad450f7454b2f80e	otu1053	D_0__Archaea;D_1__Euryarchaeota;D_2__Halobacteria;D_3__Halobacteriales;D_4__uncultured;D_5__uncultured haloarchaeon;D_6__uncultured haloarchaeon	0	0	0	0	0	0	0	0	0	0	0	0	0	0	0	0	0	0	2	0
1d0093a1efaf860cde0783a7040abbf8	otu1054	D_0__Archaea;D_1__Diapherotrites;D_2__Micrarchaeia;D_3__uncultured euryarchaeote;D_4__uncultured euryarchaeote;D_5__uncultured euryarchaeote;D_6__uncultured euryarchaeote	0	0	0	0	0	2	0	0	0	0	0	0	0	0	0	0	0	0	0	0
1d02eaa8d9a56e548a52ab9587ca1d9b	otu1055	D_0__Bacteria	0	0	0	0	0	0	0	0	0	0	0	21	0	0	0	0	0	0	0	0
1d04f55815f1680f3d133f205ef5918a	otu1056	D_0__Archaea;D_1__Euryarchaeota;D_2__Halobacteria;D_3__Halobacteriales;D_4__Haloferacaceae;D_5__Halovenus;D_6__uncultured haloarchaeon	0	5	20	0	0	0	11	0	0	0	0	17	0	0	0	0	14	0	0	0
1d0a545afa1248db8e4dccb4ed365477	otu1057	D_0__Bacteria	0	0	0	0	0	0	5	0	0	0	0	0	0	0	0	0	0	0	0	0
1d0c8828898e3bf1436af0230b737b37	otu1058	D_0__Bacteria;D_1__Proteobacteria;D_2__Deltaproteobacteria;D_3__Desulfovibrionales;D_4__Desulfohalobiaceae;D_5__Desulfovermiculus;D_6__uncultured bacterium	0	0	0	0	0	0	0	0	0	11	0	0	0	0	0	0	0	0	0	0
1d1555133e2fc8f10fea514bed9e350e	otu1059	D_0__Bacteria	0	0	0	0	0	0	0	0	0	3	0	0	0	0	0	0	0	0	0	0
1d15d29a08cb4a74482b0794451ede4b	otu1060	D_0__Bacteria;D_1__Firmicutes;D_2__Clostridia;D_3__Clostridiales;D_4__Ruminococcaceae;D_5__Saccharofermentans;D_6__uncultured microorganism	0	0	0	0	0	0	0	0	0	0	13	0	0	0	0	0	0	0	0	0
1d16bdc16a0a3c2872212deb7667d808	otu1061	D_0__Bacteria;D_1__Latescibacteria	0	0	0	0	0	0	0	0	0	0	1	0	0	0	0	0	0	0	0	0
1d253d56294244682d5069501021ec4f	otu1062	D_0__Archaea;D_1__Nanoarchaeaeota;D_2__Woesearchaeia;D_3__uncultured archaeon;D_4__uncultured archaeon;D_5__uncultured archaeon;D_6__uncultured archaeon	0	0	0	0	0	0	0	0	82	1	2	5	10	0	29	0	0	0	0	0
1d2ae2cbf450f942c17241ac3068cced	otu1063	D_0__Archaea;D_1__Euryarchaeota;D_2__Halobacteria;D_3__Halobacteriales;D_4__Haloferacaceae;D_5__Halorubrum;	0	0	0	0	0	0	0	0	16	0	0	0	0	0	0	0	0	37	0	0
1d368e19734965584b7ad656c807cb32	otu1065	D_0__Bacteria	29	14	0	10	0	0	0	0	0	0	0	0	0	0	0	0	0	0	0	0
1d3a15b2924144e8fd9441dcfe61c1dc	otu1066	D_0__Bacteria	0	2	7	0	0	0	0	0	0	0	0	0	0	0	0	0	0	0	0	0
1d451811e20003a105bbdd5711d6bd48	otu1067	D_0__Bacteria	0	3	0	0	10	10	20	1	0	99	95	0	30	46	115	0	0	0	0	0
1d473ecb517d96431f3a24513e0101b0	otu1068	D_0__Bacteria	2	0	0	0	0	0	0	0	0	0	0	0	0	0	0	0	0	0	0	0
1d596b42e161c2370dfef9ef71bdabc8	otu1069	D_0__Bacteria	4	0	0	0	0	0	0	0	0	0	0	0	0	0	0	0	0	0	0	0
1d5b27b39d2757b52d780aaf54213aee	otu1070	D_0__Bacteria;D_1__Planctomycetes;D_2__vadinHA49;D_3__uncultured Planctomycetales bacterium;D_4__uncultured Planctomycetales bacterium;D_5__uncultured Planctomycetales bacterium;D_6__uncultured Planctomycetales bacterium	0	0	0	0	0	0	0	0	0	0	0	0	0	0	19	0	0	0	0	0
1d5e35acb2502437288262bc936f172f	otu1071	D_0__Bacteria	0	0	7	0	0	0	0	0	0	0	0	0	0	0	0	0	0	0	0	0
1d63962db19a16632ff9d0fe30f38d5e	otu1072	D_0__Archaea;D_1__Nanoarchaeaeota;D_2__Woesearchaeia;D_3__uncultured euryarchaeote;D_4__uncultured euryarchaeote;D_5__uncultured euryarchaeote;D_6__uncultured euryarchaeote	0	3	0	0	0	0	0	0	0	0	0	0	0	0	0	0	0	0	0	0
1d74673d0868a4b5bb4bf36baa958c06	otu1073	D_0__Bacteria	0	0	0	0	0	0	0	0	0	0	0	2	0	0	0	0	0	0	0	0
1d7698059d2dab7ea16fae9c12a107d0	otu1074	D_0__Bacteria;D_1__Proteobacteria;D_2__Gammaproteobacteria;D_3__Nitrococcales;D_4__Nitrococcaceae;D_5__Aquisalimonas;D_6__uncultured Ectothiorhodospiraceae bacterium	0	0	0	0	0	0	0	0	0	0	0	2	0	0	0	0	0	0	0	0
1d85452ffc411aedfe1d10317add7a50	otu1075	D_0__Archaea;D_1__Euryarchaeota;D_2__Halobacteria;D_3__Halobacteriales;D_4__Haloferacaceae;D_5__Halostagnicola;D_6__Halostagnicola larsenii	0	0	0	0	0	0	0	0	0	0	0	0	0	0	0	0	0	0	4	0
1d8be034666d6aa1c4b06415985974dd	otu1076	D_0__Bacteria	0	0	0	0	0	0	0	0	0	0	0	0	0	0	0	0	0	0	1	0
1d8c82763bcaea5bdd1dbf4f340999cb	otu1077	D_0__Bacteria	0	0	0	0	0	0	0	0	0	0	0	0	0	0	0	0	0	0	0	5
1d8e344cc4628e4370f60ad711dc011a	otu1078	D_0__Bacteria	4	6	0	0	6	0	4	0	0	0	0	8	0	4	0	0	0	0	0	0
1d93db5430ccb871513de2a159757fa8	otu1079	D_0__Bacteria	0	0	0	0	0	0	0	0	0	0	0	0	0	0	0	11	0	0	0	0
1d9e56410b1c4f9d534b8249112631b1	otu1080	D_0__Bacteria	0	2	0	0	0	0	0	0	0	0	0	0	0	0	0	0	0	0	0	0
1da97d4416551099bf19cae40400bba2	otu1081	D_0__Archaea;D_1__Euryarchaeota;D_2__Halobacteria;D_3__Halobacteriales;D_4__uncultured	15	83	44	0	0	0	0	0	0	0	0	0	0	0	18	0	0	0	0	0
1db8f42ebdf43c26b5ca845cbec259e4	otu1082	D_0__Archaea;D_1__Nanoarchaeaeota;D_2__Woesearchaeia	0	0	0	0	0	0	0	0	15	0	11	0	0	0	0	6	0	0	0	0
1dc3190d20aba637811f4d08ae865d7c	otu1083	D_0__Bacteria	0	0	0	0	0	0	0	0	1	0	0	0	0	0	0	0	0	0	0	0
1dc55c28287cf4710d581be51f4f16ac	otu1084	D_0__Bacteria	0	0	0	0	0	0	0	0	0	0	0	6	0	0	0	0	0	0	0	0
1dd772db7b808c590a427bb43ba7aece	otu1085	D_0__Bacteria;D_1__Firmicutes;D_2__Clostridia;D_3__uncultured low G+C Gram-positive bacterium;D_4__uncultured low G+C Gram-positive bacterium;D_5__uncultured low G+C Gram-positive bacterium;D_6__uncultured low G+C Gram-positive bacterium	8	7	0	0	6	0	0	0	0	0	0	0	0	6	0	0	0	0	0	0
1ddfab79e904bfddeff3590e1a620aed	otu1086	D_0__Bacteria	0	0	0	1	7	0	0	0	0	0	0	0	0	0	0	0	0	0	0	0
1dee0eb4624e9c2a378307c53e900271	otu1087	D_0__Archaea;D_1__Nanoarchaeaeota;D_2__Woesearchaeia;D_3__Candidatus Pacearchaeota archaeon CG1_2_32_21;D_4__Candidatus Pacearchaeota archaeon CG1_2_32_21;D_5__Candidatus Pacearchaeota archaeon CG1_2_32_21;D_6__Candidatus Pacearchaeota archaeon CG1_2_32_21	0	0	0	0	0	3	1	0	47	0	44	91	20	13	23	0	0	0	0	0
1dee3c5d952bf1830bb513c23d3dbb8b	otu1088	D_0__Bacteria	0	0	0	0	2	0	0	3	0	0	0	0	0	0	0	0	0	0	0	0
1df106db2c3bb06d343f87e2a764aacd	otu1089	D_0__Archaea;D_1__Nanoarchaeaeota;D_2__Woesearchaeia;D_3__unidentified archaeon;D_4__unidentified archaeon;D_5__unidentified archaeon;D_6__unidentified archaeon	0	0	0	0	23	0	0	0	0	0	0	0	0	0	0	3	0	0	0	0
1df69b82ac912216c46234208fddc02c	otu1091	D_0__Bacteria;D_1__Firmicutes;D_2__Clostridia;D_3__Clostridiales;D_4__Syntrophomonadaceae;D_5__uncultured;D_6__uncultured low G+C Gram-positive bacterium	0	0	0	0	0	0	0	0	5	0	0	0	0	0	0	0	0	0	0	0
1df717c0776600cfd5ee6d065c93ba89	otu1092	D_0__Bacteria	0	0	0	0	0	0	0	0	0	0	0	7	0	0	0	0	0	0	0	0
1e15ae05f3472459f791faa212a57b58	otu1093	D_0__Bacteria;D_1__Patescibacteria;D_2__Parcubacteria	67	63	63	46	0	0	0	47	0	0	0	0	12	0	29	0	0	0	0	0
1e21f57e0b5a7c6555389d3cc9203163	otu1094	D_0__Archaea;D_1__Nanoarchaeaeota;D_2__Woesearchaeia	0	0	0	0	0	0	0	0	83	4	27	8	0	0	0	5	0	0	0	0
1e2507ea8e851b5066ad4966ced2edb5	otu1095	D_0__Archaea;D_1__Euryarchaeota;D_2__Halobacteria;D_3__Halobacteriales;D_4__uncultured;D_5__uncultured haloarchaeon;D_6__uncultured haloarchaeon	0	0	0	0	3	0	0	0	0	0	0	0	0	0	0	0	0	0	0	0
1e2e66d32103b242e07122616f070e3c	otu1096	D_0__Bacteria	0	0	0	0	0	0	6	0	0	0	0	0	0	0	0	0	0	0	0	0
1e325c043be87e6c3bc451628a30412e	otu1097	D_0__Bacteria	0	0	0	0	0	1	0	0	0	0	0	0	0	0	0	0	0	0	0	0
1e36921aaee56a3e4183596ef66249fa	otu1098	D_0__Bacteria;D_1__Planctomycetes;D_2__Planctomycetacia;D_3__Pirellulales;D_4__Pirellulaceae;D_5__Pir4 lineage;D_6__uncultured organism	0	6	38	0	0	0	16	0	0	0	0	0	0	0	0	0	0	0	0	0
1e39ee5a423556c389c2fb25db37ff21	otu1100	D_0__Bacteria	0	13	0	0	0	0	0	0	0	0	0	0	0	0	0	0	0	0	0	0
1e3f3bf974c77e26c9839613b1366532	otu1101	D_0__Archaea;D_1__Nanoarchaeaeota;D_2__Woesearchaeia;D_3__uncultured euryarchaeote;D_4__uncultured euryarchaeote;D_5__uncultured euryarchaeote;D_6__uncultured euryarchaeote	0	0	0	0	0	0	0	0	0	0	0	0	0	0	0	0	0	0	3	0
1e43ba80ea3fa02db8215799dc4bd39b	otu1102	D_0__Bacteria	3	23	14	14	0	0	0	0	0	0	0	0	0	0	0	0	0	0	0	0
1e4796550fdd1c12c9b64f342d02900f	otu1103	D_0__Bacteria	0	0	0	0	0	0	0	0	0	0	0	0	0	0	0	0	0	1	0	0
1e4d6b0771b56ae432a1e5d9d993d5d5	otu1104	D_0__Bacteria	0	0	0	0	0	0	0	0	6	0	0	0	0	0	0	0	0	0	0	0
1e4f2bfb8409e1667cfeee8e472a8638	otu1105	D_0__Archaea;D_1__Nanoarchaeaeota;D_2__Woesearchaeia;D_3__uncultured archaeon;D_4__uncultured archaeon;D_5__uncultured archaeon;D_6__uncultured archaeon	0	21	0	33	302	0	129	0	0	0	2	0	3	0	0	0	0	0	0	6
1e540da99c3768cfe525ca40c5357aef	otu1106	D_0__Bacteria	0	0	0	0	0	7	0	0	0	0	0	0	0	0	0	0	2	0	0	0
1e6ebb1286431509d6c386396b168c18	otu1107	D_0__Bacteria;D_1__Cloacimonetes;D_2__Cloacimonadia;D_3__Cloacimonadales;D_4__NK-L14;D_5__uncultured organism;D_6__uncultured organism	0	0	0	0	0	0	0	0	2	0	0	0	0	0	0	0	0	0	0	0
1e6f155fe5d7b168a3cbcb045dad54df	otu1108	D_0__Bacteria	0	0	0	6	0	0	0	0	0	0	0	0	0	0	0	0	0	0	0	0
1e7cbaa19ebea999fc95f3ed466a375c	otu1109	D_0__Bacteria	0	0	0	0	2	0	0	0	0	0	0	0	0	0	0	0	0	0	0	0
1e8ead018fbd9aa4467e945223c90077	otu1110	D_0__Bacteria	0	0	0	0	0	0	0	0	12	0	0	0	0	0	0	0	0	0	0	0
1e99d397ae89962beea8bf21c7eafa08	otu1111	D_0__Bacteria	0	0	0	0	0	0	0	0	0	0	0	0	3	0	0	0	0	0	0	0
1ea21353ac80a452a9307f1e33959e42	otu1112	D_0__Bacteria	0	0	0	0	5	0	0	0	0	0	0	0	0	0	0	0	0	0	0	0
1ea23c3df8e1059c9e6f6e251be46a10	otu1113	D_0__Bacteria;D_1__Bacteroidetes;D_2__Bacteroidia;D_3__Bacteroidales;D_4__SB-5	8	0	3	0	0	11	1	9	0	0	0	0	0	0	0	0	0	0	0	0
1ea544c4dfde30fcfc62d80f90765d17	otu1114	D_0__Bacteria	0	0	0	73	0	0	54	32	0	0	0	0	0	0	0	0	0	0	0	0
1ea5516a404ab06c819bb79ccbedb53d	otu1115	D_0__Bacteria	0	0	0	0	0	0	0	0	0	0	0	8	0	0	0	0	0	0	0	0
1eaac765824a133b3e94b9a6d149dbe6	otu1116	D_0__Bacteria	0	0	1	0	0	0	0	0	0	0	0	0	0	0	0	0	0	0	0	0
1eb92746cde7f13c2628168bb8019979	otu1117	D_0__Archaea;D_1__Euryarchaeota;D_2__Halobacteria;D_3__Halobacteriales;D_4__Haloferacaceae;D_5__uncultured;D_6__uncultured haloarchaeon	7	0	0	0	0	0	0	0	0	0	0	0	0	0	0	0	0	0	0	0
1ebb19972fd4718a4364ef62efdebb34	otu1118	D_0__Bacteria	0	0	0	0	0	0	0	0	0	0	0	0	0	0	8	0	0	0	0	0
1ebc430bc3076012e1d427681c20b7e7	otu1119	D_0__Bacteria;D_1__Proteobacteria;D_2__Alphaproteobacteria;D_3__Rickettsiales;D_4__Mitochondria	0	0	0	0	0	0	8	0	0	0	0	0	0	0	0	0	0	0	0	0
1ec2a6f02f9cd334606ddd12982709b9	otu1120	D_0__Bacteria	0	0	4	0	0	0	0	0	0	0	0	0	0	0	0	0	0	0	0	0
1ec4c62322b5c00e36f2518e101624a0	otu1121	D_0__Bacteria;D_1__Planctomycetes;D_2__OM19	0	0	0	0	31	0	49	6	0	0	0	0	0	0	0	0	0	0	0	0
1ec82ddbbfe4565f8b173a2e33fd2e02	otu1122	D_0__Bacteria	0	0	0	0	0	5	0	0	0	0	0	0	0	0	0	0	0	0	0	0
1ed6a57503ab292395d083137e4d4c43	otu1123	D_0__Bacteria;D_1__Planctomycetes;D_2__Planctomycetacia;D_3__Pirellulales;D_4__Pirellulaceae	0	21	19	49	9	0	14	0	0	0	0	0	0	0	0	0	0	0	0	0
1ee0e2d0688545431a555b2bc175e11b	otu1124	D_0__Bacteria;D_1__Planctomycetes;D_2__Planctomycetacia;D_3__Pirellulales;D_4__Pirellulaceae;D_5__Pir4 lineage;	0	0	3	0	0	0	0	0	0	0	0	0	0	0	0	0	0	0	0	0
1ee3d9ba8d8f013370dc52565a93c2d4	otu1125	D_0__Bacteria;D_1__Halanaerobiaeota;D_2__Halanaerobiia;D_3__Halanaerobiales;D_4__Halanaerobiaceae;D_5__Halanaerobium;D_6__uncultured Firmicutes bacterium	58	10	0	4	1	18	5	22	23	6	37	0	39	6	51	0	0	45	12	24
1ee472f42245f6287a3e7eb5a76c1775	otu1126	D_0__Bacteria;D_1__Planctomycetes;D_2__vadinHA49;D_3__uncultured Planctomycetales bacterium;D_4__uncultured Planctomycetales bacterium;D_5__uncultured Planctomycetales bacterium;D_6__uncultured Planctomycetales bacterium	0	0	0	0	0	0	0	0	0	0	0	0	3	0	0	0	0	0	0	0
1ee5e513d85bb5c37913990b87495eff	otu1127	D_0__Bacteria	0	0	0	0	0	0	0	0	0	0	0	12	0	0	0	0	0	0	0	0
1eecc61ceb7205ba1714100ad924137f	otu1128	D_0__Bacteria	0	0	0	0	0	0	0	0	0	0	0	3	0	0	0	0	0	0	0	0
1ef01f32c86a5f7c81237a2b6f68e664	otu1129	D_0__Bacteria	0	2	0	0	0	0	0	0	0	0	0	0	0	0	0	0	0	0	0	0
1ef153a5af0f17597d79f29d24275cc4	otu1130	D_0__Bacteria	0	0	0	0	0	0	0	0	0	0	1	0	0	0	0	0	0	0	0	0
1ef173c878d28a4124426558b6b21c70	otu1131	D_0__Archaea;D_1__Euryarchaeota;D_2__Halobacteria;D_3__Halobacteriales;D_4__Haloferacaceae;D_5__Natronolimnobius;D_6__Natronolimnobius baerhuensis	0	0	0	0	0	0	0	0	0	0	19	0	6	0	0	0	0	0	0	0
1f0749034b0985d8beb0c60846eb8dc1	otu1132	D_0__Bacteria;D_1__Patescibacteria	6	5	9	0	0	0	0	0	15	0	0	0	0	9	14	0	0	0	0	0
1f1b6863d1b46efbf1508280f66a4584	otu1133	D_0__Bacteria;D_1__Patescibacteria;D_2__Saccharimonadia;D_3__Saccharimonadales;D_4__uncultured bacterium;D_5__uncultured bacterium;D_6__uncultured bacterium	2	5	14	0	0	0	0	0	0	0	0	0	0	0	0	0	0	0	0	0
1f270c5647c9e94680d20aeaef409553	otu1134	D_0__Bacteria;D_1__Planctomycetes;D_2__vadinHA49	0	0	0	0	40	37	48	0	0	187	35	0	21	0	0	0	0	0	0	0
1f3c3901738acbdc3ada061983dd50aa	otu1135	D_0__Bacteria;D_1__Patescibacteria;D_2__Parcubacteria;D_3__Candidatus Kaiserbacteria;D_4__uncultured bacterium;D_5__uncultured bacterium;D_6__uncultured bacterium	0	0	0	0	8	0	0	0	0	0	0	0	0	0	0	0	0	0	0	0
1f3eb04904312b9ddeeefbb2f2b9a930	otu1136	D_0__Bacteria	0	6	0	0	0	0	0	0	0	0	0	0	0	0	0	0	0	0	0	0
1f50b2c95c2cdced9a804f7c7aac4813	otu1137	D_0__Bacteria;D_1__Proteobacteria;D_2__Gammaproteobacteria;D_3__Betaproteobacteriales;D_4__Burkholderiaceae	0	0	0	0	0	0	0	0	0	0	0	0	0	6	0	0	0	0	0	0
1f539df8915b7bfcf42ff86ab1fb7759	otu1138	D_0__Bacteria	0	0	0	0	0	0	0	0	0	0	0	0	0	0	0	0	0	0	19	0
1f55402190345e8a93c3fb39a3201741	otu1139	D_0__Bacteria;D_1__Patescibacteria;D_2__Parcubacteria	0	0	0	1	0	0	0	0	0	0	0	0	0	0	0	0	0	0	0	0
1f5b8306e98921bfb132ba5f73e46b5a	otu1140	D_0__Archaea;D_1__Euryarchaeota;D_2__Thermoplasmata;D_3__uncultured;D_4__uncultured archeon 'KTK 4A';D_5__uncultured archeon 'KTK 4A';D_6__uncultured archeon 'KTK 4A'	0	0	0	0	0	0	0	0	0	0	10	0	0	0	0	0	0	0	0	0
1f67b865b513c12ea846f1db91ece257	otu1141	D_0__Bacteria	0	0	0	3	1	0	0	0	0	0	0	0	0	0	0	0	0	0	0	0
1f74ea2a0b9091bc3046fbda382f73e3	otu1142	D_0__Bacteria;D_1__Cloacimonetes;D_2__Cloacimonadia;D_3__Cloacimonadales	12	0	0	0	0	0	0	0	0	0	0	0	0	0	0	0	0	0	0	0
1f7921c72a0ee8a93d196768af8ffe6e	otu1143	D_0__Bacteria;D_1__Halanaerobiaeota;D_2__Halanaerobiia;D_3__Halanaerobiales;D_4__Halanaerobiaceae;D_5__Halanaerobium;D_6__uncultured Firmicutes bacterium	0	0	9	0	0	0	0	0	0	0	0	0	0	0	0	0	0	0	0	0
1f7a561a4f82bb678b6669c4a94e4aee	otu1144	D_0__Archaea;D_1__Euryarchaeota;D_2__Halobacteria;D_3__Halobacteriales;D_4__Haloferacaceae;D_5__uncultured;	0	0	10	20	0	0	0	0	0	0	0	0	8	0	0	0	0	0	0	0
1f8180e5b047e3243885c9a9d680ce0b	otu1145	D_0__Bacteria	0	0	0	0	0	0	0	0	0	0	0	0	0	0	3	0	0	0	0	0
1f848e3c3916fc30cb04080210111c50	otu1146	D_0__Bacteria;D_1__Cyanobacteria;D_2__Oxyphotobacteria;D_3__Chloroplast	0	0	0	2	0	0	0	0	0	0	0	0	0	0	0	0	0	0	0	0
1f9285054daa5b767a2397623b072aa3	otu1147	D_0__Bacteria;D_1__Atribacteria;D_2__JS1;D_3__uncultured microorganism;D_4__uncultured microorganism;D_5__uncultured microorganism;D_6__uncultured microorganism	0	0	7	0	0	0	0	0	0	0	0	0	0	0	0	0	0	0	0	0
1f997ce20f7a799cd6352d639f90a365	otu1148	D_0__Bacteria	3	0	0	0	0	0	0	0	0	0	0	0	0	0	0	0	0	0	0	0
1fb005de675c23b03d6559c0897cc4e5	otu1149	D_0__Archaea;D_1__Euryarchaeota;D_2__Halobacteria;D_3__Halobacteriales;D_4__Haloferacaceae;D_5__Halohasta;D_6__uncultured archaeon	34	56	18	81	0	51	40	23	0	0	0	31	0	34	0	0	0	0	0	0
1fb7240976fa78c1077862e8cc438fb6	otu1151	D_0__Bacteria;D_1__Patescibacteria;D_2__ABY1;D_3__Candidatus Falkowbacteria;D_4__uncultured bacterium;D_5__uncultured bacterium;D_6__uncultured bacterium	0	0	0	0	0	0	0	0	2	0	0	0	0	0	0	0	0	0	0	0
1fc62b0063493cddf872a2addcb98308	otu1152	D_0__Bacteria	0	0	0	0	0	0	0	0	0	0	0	0	0	0	0	3	0	0	0	0
1fe4a70d7f44a0677105c24be40f221c	otu1153	D_0__Archaea;D_1__Nanoarchaeaeota;D_2__Woesearchaeia;D_3__uncultured euryarchaeote;D_4__uncultured euryarchaeote;D_5__uncultured euryarchaeote;D_6__uncultured euryarchaeote	0	0	0	0	0	0	0	0	4	0	0	0	0	0	0	0	0	0	0	0
1fe94be268925fa3aac6b02ef0e1eeea	otu1154	D_0__Bacteria;D_1__Firmicutes;D_2__Clostridia;D_3__Clostridiales;D_4__Syntrophomonadaceae;D_5__Candidatus Contubernalis;D_6__uncultured low G+C Gram-positive bacterium	0	0	0	0	0	0	7	0	0	11	0	0	6	10	0	0	0	0	7	0
1fedc779f1af19f53917cd8d98fd0fce	otu1155	D_0__Bacteria;D_1__Planctomycetes;D_2__Planctomycetacia;D_3__Pirellulales;D_4__Pirellulaceae;D_5__Rhodopirellula;D_6__Pirellula sp.	65	282	372	19	177	8	107	104	0	0	3	0	5	0	0	0	0	0	0	0
1ff374853338dcdd0f813902a3d489f9	otu1156	D_0__Archaea;D_1__Hadesarchaeaeota;D_2__candidate divison MSBL1 archaeon SCGC-AAA259D14;D_3__candidate divison MSBL1 archaeon SCGC-AAA259D14;D_4__candidate divison MSBL1 archaeon SCGC-AAA259D14;D_5__candidate divison MSBL1 archaeon SCGC-AAA259D14;D_6__candidate divison MSBL1 archaeon SCGC-AAA259D14	0	0	0	0	0	0	0	0	0	11	0	0	0	0	0	0	0	0	0	5
1ffb2077f87f4230abbd246ca4bab98a	otu1157	D_0__Bacteria	0	0	0	0	0	0	0	0	0	0	0	0	1	0	0	0	0	0	0	0
200125dbfc57d155557002fac2b0803a	otu1158	D_0__Archaea;D_1__Euryarchaeota;D_2__Halobacteria;D_3__Halobacteriales;D_4__Haloferacaceae;D_5__Halovenus;D_6__uncultured haloarchaeon	0	0	0	0	0	0	5	0	0	0	0	0	0	0	0	0	0	0	0	0
200a13fff7b3d509f733db7596c0477f	otu1159	D_0__Bacteria	0	0	0	0	0	0	0	0	0	0	3	0	0	0	0	0	0	0	0	0
201468a729a92b190d69b822bb892a1a	otu1160	D_0__Bacteria;D_1__Lentisphaerae;D_2__Oligosphaeria;D_3__Oligosphaerales;D_4__Lenti-2;D_5__uncultured bacterium;D_6__uncultured bacterium	0	0	0	33	0	0	0	0	0	0	0	0	0	0	0	0	0	0	0	0
2018dba8ef069dd7a07324f59b5f2440	otu1161	D_0__Bacteria	8	0	0	0	0	0	0	0	0	0	0	0	0	0	0	0	0	0	0	0
201e27496408e488a9d1993daa647209	otu1162	D_0__Bacteria;D_1__Patescibacteria;D_2__Parcubacteria;D_3__uncultured bacterium;D_4__uncultured bacterium;D_5__uncultured bacterium;D_6__uncultured bacterium	0	0	0	0	0	0	0	0	24	0	0	0	0	0	0	0	0	0	0	0
2026d3bede3de8c1f7b7a72160c38818	otu1164	D_0__Bacteria;D_1__Gemmatimonadetes;D_2__BD2-11 terrestrial group;D_3__uncultured forest soil bacterium;D_4__uncultured forest soil bacterium;D_5__uncultured forest soil bacterium;D_6__uncultured forest soil bacterium	0	0	0	0	0	0	13	0	0	0	0	0	0	0	0	0	0	0	0	0
20274ca63a99248f3133258b0fa1f073	otu1165	D_0__Archaea;D_1__Euryarchaeota;D_2__Halobacteria;D_3__Halobacteriales;D_4__Haloferacaceae;D_5__Salinarchaeum;D_6__uncultured haloarchaeon	0	0	0	0	0	0	0	0	0	0	0	0	0	0	0	0	1	0	0	0
203b18ab92ea0fd187c93f06a5f9b9fa	otu1166	D_0__Archaea;D_1__Euryarchaeota;D_2__Halobacteria;D_3__Halobacteriales;D_4__Haloferacaceae;D_5__Halorubrum;D_6__Halorubrum gandharaense	0	0	0	0	0	0	0	0	0	0	0	0	0	0	0	0	37	0	13	0
205d672a132940335beb9b5ca249a6d7	otu1167	D_0__Bacteria;D_1__Planctomycetes;D_2__Planctomycetacia;D_3__Isosphaerales;D_4__Isosphaeraceae;D_5__uncultured;D_6__uncultured bacterium	0	0	0	0	9	0	0	0	0	0	0	0	0	0	0	0	0	0	0	0
206b362a20ad198b4c4e93fa03bf56ed	otu1168	D_0__Bacteria;D_1__Verrucomicrobia;D_2__Verrucomicrobiae;D_3__Pedosphaerales;D_4__Pedosphaeraceae;D_5__uncultured bacterium;D_6__uncultured bacterium	0	0	16	0	0	0	0	0	0	0	0	0	0	0	0	0	0	0	0	0
206e5d0ade668ea90db9557931b0a85f	otu1169	D_0__Archaea;D_1__Euryarchaeota;D_2__Halobacteria;D_3__Halobacteriales;D_4__uncultured;D_5__uncultured haloarchaeon;D_6__uncultured haloarchaeon	0	0	0	0	12	0	6	0	0	0	0	0	0	0	15	0	9	0	10	0
206e9cda45e884e80e61b78e46027df2	otu1170	D_0__Bacteria;D_1__Verrucomicrobia;D_2__Verrucomicrobiae	0	0	0	0	0	0	0	0	0	0	0	0	0	2	0	0	0	0	0	0
20737f28302a388944b967f553694aa6	otu1172	D_0__Archaea;D_1__Nanoarchaeaeota;D_2__Woesearchaeia;D_3__unidentified archaeon;D_4__unidentified archaeon;D_5__unidentified archaeon;D_6__unidentified archaeon	9	24	15	0	0	3	3	4	0	0	23	0	0	0	0	0	0	0	0	0
208251ec8d739c4e8179f3a032c48fba	otu1173	D_0__Bacteria;D_1__Patescibacteria;D_2__Parcubacteria	0	0	0	0	0	0	0	0	0	0	0	0	101	65	20	0	0	11	0	0
2083664c2d71a3fb07ab4861b67434d1	otu1174	D_0__Bacteria;D_1__Patescibacteria;D_2__ABY1;D_3__Candidatus Magasanikbacteria;D_4__uncultured bacterium;D_5__uncultured bacterium;D_6__uncultured bacterium	0	0	0	0	21	0	0	0	0	0	0	0	0	0	0	0	0	0	0	0
20838c510fcaa580e4eaf2871dae9936	otu1175	D_0__Bacteria;D_1__Firmicutes;D_2__Clostridia;D_3__Clostridiales	20	8	0	0	0	0	0	0	0	0	0	0	0	0	0	0	0	0	0	0
208be448075793f3ba2793b37e032380	otu1176	D_0__Bacteria	0	0	0	0	0	0	0	0	0	0	0	7	0	0	0	0	0	0	0	0
208dd56d175923319b7b91bce5b9acb1	otu1177	D_0__Bacteria	0	0	0	0	0	0	0	0	0	0	6	0	0	0	0	0	0	0	0	0
2093f234747368c53c9602262a792e49	otu1178	D_0__Bacteria	0	0	0	0	0	0	0	0	0	0	0	15	0	0	0	0	0	0	0	0
209606c6b3577f88bea7fb9c3fc3b61f	otu1179	D_0__Bacteria;D_1__Halanaerobiaeota;D_2__Halanaerobiia;D_3__Halanaerobiales;D_4__Halanaerobiaceae;D_5__Halarsenatibacter;D_6__uncultured Bacteroidetes bacterium	0	0	0	0	0	0	0	0	0	39	0	22	0	0	0	0	0	33	0	0
209d71088b5d81b4aa94e2c0106ecdf3	otu1180	D_0__Archaea;D_1__Nanoarchaeaeota;D_2__Woesearchaeia	0	0	0	0	24	0	0	6	0	0	0	0	0	0	0	0	0	0	0	0
20a818485cb6b93e5a39fe5341ea6850	otu1181	D_0__Archaea;D_1__Euryarchaeota;D_2__Halobacteria;D_3__Halobacteriales;D_4__Haloferacaceae;D_5__Halovenus;D_6__uncultured haloarchaeon	0	14	0	0	0	0	0	0	0	0	0	0	0	0	0	0	0	0	0	0
20ab44cd600a061d0f315d0116c74bfa	otu1182	D_0__Bacteria;D_1__Armatimonadetes;D_2__uncultured;D_3__uncultured bacterium;D_4__uncultured bacterium;D_5__uncultured bacterium;D_6__uncultured bacterium	0	0	0	1	0	0	0	0	0	0	0	0	0	0	0	0	0	0	0	0
20b4b4039eeb5ee4ec689324a01968d8	otu1183	D_0__Bacteria	0	0	0	0	0	0	16	0	0	0	0	0	0	0	0	0	0	0	0	0
20b7145467ec667f6394c898d907bed1	otu1184	D_0__Bacteria;D_1__Planctomycetes;D_2__Planctomycetacia;D_3__Pirellulales;D_4__Pirellulaceae;D_5__Pirellula;D_6__planctomycete str. 449	31	79	157	13	277	0	141	71	0	0	0	0	0	0	0	0	0	0	0	0
20c0647185c235050ad557c7be49a906	otu1185	D_0__Bacteria;D_1__Cyanobacteria;D_2__Oxyphotobacteria;D_3__Chloroplast	0	0	0	0	0	0	0	0	0	0	0	0	0	2	0	0	0	0	0	0
20d0bea9fc49cf539d4802b2e73ddc99	otu1186	D_0__Bacteria	0	0	0	0	0	0	0	0	4	0	0	0	0	0	0	0	0	0	0	0
20d5d448644ee87a85d86d217e9afb17	otu1187	D_0__Bacteria;D_1__Firmicutes;D_2__Clostridia;D_3__Clostridiales;D_4__Family XVIII;D_5__Symbiobacterium;D_6__Clostridiales bacterium AND1	0	0	0	0	14	0	0	0	0	0	0	0	0	0	0	0	0	0	0	0
20d6cc093fa8a465826e8e03e14cbdfc	otu1188	D_0__Bacteria;D_1__Cloacimonetes;D_2__Cloacimonadia;D_3__Cloacimonadales;D_4__NK-L14;D_5__uncultured organism;D_6__uncultured organism	2	0	0	0	0	0	0	0	0	0	0	0	0	0	0	0	0	0	0	0
20d7dd402b72bdc805e981ede0c32ae9	otu1189	D_0__Bacteria	0	0	0	0	0	4	0	0	0	0	0	0	0	0	0	0	0	0	2	0
20db48f523a67070767636671ed99d1f	otu1190	D_0__Bacteria	0	0	0	0	0	0	0	0	0	0	0	0	0	0	0	0	0	0	0	3
20f80687a0a66ef8289d6e6003653ac5	otu1191	D_0__Bacteria	0	0	0	0	0	0	0	0	0	0	2	0	0	0	0	0	0	0	0	0
21065637beecfa6fb257422321cdc9e0	otu1192	D_0__Bacteria;D_1__Lentisphaerae;D_2__Oligosphaeria;D_3__Oligosphaerales;D_4__Oligosphaeraceae;D_5__uncultured Verrucomicrobia bacterium;D_6__uncultured Verrucomicrobia bacterium	0	0	0	0	0	0	0	0	0	5	0	0	0	0	0	0	0	0	0	0
211d7c984758ecb7061b653f7006cc06	otu1193	D_0__Archaea;D_1__Euryarchaeota;D_2__Halobacteria;D_3__Halobacteriales;D_4__Haloferacaceae;D_5__uncultured;D_6__Halovivax sp.	156	0	0	53	0	0	0	0	0	0	0	0	0	0	0	0	0	0	0	0
2125b56f72a4d08e18bb8b589452f436	otu1194	D_0__Bacteria	0	2	0	0	0	0	0	0	0	0	0	0	0	0	0	0	0	0	0	0
212848389e3f4d63bf1091e008a675c1	otu1195	D_0__Bacteria;D_1__Firmicutes;D_2__Clostridia;D_3__Clostridiales;D_4__Syntrophomonadaceae;D_5__uncultured;D_6__uncultured low G+C Gram-positive bacterium	6	15	0	15	0	0	0	0	0	0	0	0	0	0	0	0	0	0	0	0
2134f43f84d7a56ae3e37c1d01746afc	otu1196	D_0__Bacteria	0	0	0	0	0	0	0	0	0	0	0	0	0	0	6	0	0	0	0	0
213682ae18fe6d7b7ff244ea8c6e474c	otu1197	D_0__Bacteria	0	0	0	0	0	0	0	0	0	0	0	0	0	0	0	0	0	17	0	0
213adcadea16b9ec52eae8ef4b943b3b	otu1198	D_0__Bacteria	0	0	0	1	0	0	0	0	0	0	0	0	0	0	0	0	0	0	0	0
21420164de7b0dbf50925d111969f9e9	otu1199	D_0__Bacteria;D_1__Cyanobacteria;D_2__Oxyphotobacteria;D_3__Chloroplast	0	0	0	0	0	0	0	0	0	0	0	0	0	8	0	0	0	0	0	0
21468fa2eeb72bd4da6efbd9acde1e05	otu1200	D_0__Archaea;D_1__Euryarchaeota;D_2__Halobacteria;D_3__Halobacteriales;D_4__Haloferacaceae	401	185	186	279	140	102	67	104	16	24	36	65	13	0	0	0	0	26	16	11
2149edd1426504ac129ac600be11fa48	otu1201	D_0__Bacteria;D_1__Planctomycetes;D_2__Planctomycetacia;D_3__Pirellulales;D_4__Pirellulaceae;D_5__uncultured;D_6__uncultured bacterium	0	0	0	0	0	18	22	0	0	0	0	0	0	0	0	0	0	0	0	0
2150034f8d0b3dfee0855f9a9fd3e2f1	otu1202	D_0__Bacteria	0	3	0	0	0	0	0	0	0	0	0	0	0	0	0	0	0	0	0	0
2153a99a3b710d9120a170a1ba9b2648	otu1203	D_0__Archaea;D_1__Thaumarchaeota;D_2__Nitrososphaeria;D_3__Nitrososphaerales;D_4__Nitrososphaeraceae;D_5__Candidatus Nitrososphaera;	0	0	0	0	0	0	0	0	0	0	0	0	0	0	0	7	0	0	0	0
21622168b9c7aa2f9d351a02ffbdab9a	otu1204	D_0__Archaea;D_1__Euryarchaeota;D_2__Halobacteria;D_3__Halobacteriales;D_4__Haloferacaceae;D_5__Halonotius;D_6__uncultured archaeon	0	0	0	0	6	0	0	0	0	0	0	0	0	0	0	0	0	0	0	0
216b6a7ce369e1dc3fe54326f73ac269	otu1205	D_0__Archaea;D_1__Euryarchaeota;D_2__Halobacteria;D_3__Halobacteriales;D_4__Haloferacaceae;D_5__Salinarchaeum;D_6__uncultured haloarchaeon	0	0	0	0	0	0	0	0	0	0	0	0	0	0	0	0	10	0	0	0
216fac7415d2352545ccb2e395439b3c	otu1206	D_0__Bacteria;D_1__Omnitrophicaeota;D_2__Candidatus Omnitrophus magneticus;D_3__Candidatus Omnitrophus magneticus;D_4__Candidatus Omnitrophus magneticus;D_5__Candidatus Omnitrophus magneticus;D_6__Candidatus Omnitrophus magneticus	11	36	10	27	7	73	17	65	0	0	0	0	0	0	0	0	0	0	0	0
21700824223c6cf965d588e7c62c1c7e	otu1207	D_0__Bacteria	0	2	0	0	5	0	0	0	0	0	0	0	0	0	0	0	0	0	0	0
21714718fc337e5387030e6a91250e47	otu1208	D_0__Bacteria	0	0	0	0	0	2	0	0	0	0	0	0	0	0	0	0	0	0	0	0
217437f6f5e1f398ff40f9240345793a	otu1209	D_0__Bacteria	0	0	0	0	0	0	0	0	0	0	0	0	0	3	0	0	0	0	0	0
217e1d20cede4059ed7bc085a5b068d8	otu1210	D_0__Bacteria	0	0	0	0	0	0	0	0	0	0	0	4	0	0	0	0	0	0	0	0
2185cb4674eac21e0723c876142fff3a	otu1211	D_0__Bacteria	0	0	0	0	0	0	0	0	4	0	0	7	0	0	0	0	0	3	0	0
21909d46781bf38915c60e460eef7f3a	otu1212	D_0__Bacteria	0	0	0	0	0	0	0	0	0	0	0	0	0	0	0	1	0	0	0	0
219943e1ed065eb840b9223077eb8e3b	otu1213	D_0__Archaea;D_1__Nanoarchaeaeota;D_2__Woesearchaeia	0	0	0	0	0	0	6	0	0	0	0	0	0	0	0	0	0	0	0	0
219d56944ce85a0a751a23687c865cd7	otu1214	D_0__Bacteria;D_1__Firmicutes;D_2__Clostridia;D_3__Clostridiales;D_4__Syntrophomonadaceae;D_5__uncultured;D_6__uncultured Firmicutes bacterium	36	0	0	0	0	13	0	0	0	0	0	0	0	0	0	0	0	0	0	2
21aaab8b2931bddb1d59327a540c196f	otu1215	D_0__Bacteria;D_1__Firmicutes;D_2__Clostridia;D_3__Clostridiales;D_4__Peptostreptococcaceae;D_5__uncultured;D_6__uncultured Clostridium sp.	0	0	0	0	0	0	2	0	0	0	0	0	0	0	0	0	0	0	0	0
21ab25ea8989047a1bb9c2204caed503	otu1216	D_0__Bacteria;D_1__Proteobacteria;D_2__Alphaproteobacteria;D_3__Rickettsiales;D_4__Mitochondria	150	395	435	82	721	295	452	115	1349	196	192	1148	555	236	47	1055	1	1	2	4
21b9411613b9ad78a7b686fe96943671	otu1217	D_0__Archaea;D_1__Euryarchaeota;D_2__Halobacteria;D_3__Halobacteriales;D_4__uncultured;D_5__uncultured haloarchaeon;D_6__uncultured haloarchaeon	0	0	0	0	0	0	0	0	0	0	0	0	0	0	0	0	4	24	7	28
21c7ba9fd633c90733067a86632b6db0	otu1218	D_0__Bacteria	0	0	0	3	0	0	0	0	0	0	0	0	0	0	0	0	0	0	0	0
21cedd5b38ca702592c11c0aa0245f65	otu1219	D_0__Archaea;D_1__Euryarchaeota;D_2__Halobacteria;D_3__Halobacteriales;D_4__uncultured;D_5__uncultured haloarchaeon;D_6__uncultured haloarchaeon	0	0	0	7	0	0	0	0	0	0	0	0	0	0	0	0	0	0	0	0
21e2a3b974fa34ab979c4efef6b79ec0	otu1220	D_0__Bacteria	0	0	0	0	0	0	0	0	0	0	0	0	0	1	0	0	0	0	0	0
21e3e91b48867d8629c75a45e804287e	otu1221	D_0__Bacteria	0	0	0	0	0	0	1	0	0	0	0	0	0	0	0	0	0	0	0	0
21f2721e49a1013742244826e525bafa	otu1222	D_0__Bacteria;D_1__Cyanobacteria;D_2__Oxyphotobacteria;D_3__Synechococcales;D_4__Cyanobiaceae;D_5__Cyanobium PCC-637;D_6__Synechococcus sp. EW15	0	0	0	0	0	0	0	0	0	0	0	3	0	0	0	0	0	0	0	0
21f5cde9b7f3c83564b1a53aa1721a52	otu1223	D_0__Bacteria;D_1__Patescibacteria;D_2__Parcubacteria	0	29	2	0	0	0	0	0	2	0	0	0	0	0	0	0	0	0	0	0
21f892f80aacbbc8069136c33592b0d7	otu1224	D_0__Bacteria;D_1__Cloacimonetes;D_2__Cloacimonadia;D_3__Cloacimonadales;D_4__NK-L14;D_5__uncultured bacterium;D_6__uncultured bacterium	26	16	28	28	444	220	602	339	164	312	481	19	2322	475	805	41	0	16	50	35
220c03d4a7b3a2c74696fd5902c1dbbb	otu1225	D_0__Bacteria;D_1__Firmicutes;D_2__Clostridia;D_3__Clostridiales;D_4__Syntrophomonadaceae;D_5__uncultured;D_6__uncultured low G+C Gram-positive bacterium	0	0	9	0	0	0	0	0	0	0	0	0	0	0	0	0	0	0	0	0
2210de024161859c5dfa558232fa827c	otu1226	D_0__Archaea;D_1__Euryarchaeota;D_2__Halobacteria;D_3__Halobacteriales;D_4__Haloferacaceae;D_5__Salinarchaeum;D_6__uncultured haloarchaeon	33	0	9	14	18	0	9	20	0	0	0	0	9	11	12	0	0	14	15	0
2225e773b74fae6760e07e7c1fa1ff0b	otu1227	D_0__Bacteria;D_1__Planctomycetes;D_2__Planctomycetacia;D_3__Pirellulales;D_4__Pirellulaceae;D_5__Roseimaritima;	0	0	0	0	10	0	0	0	0	0	0	0	0	0	0	0	0	0	0	0
22295ce27b7a7e67c56ce819b42440db	otu1228	D_0__Bacteria	0	0	0	5	0	0	0	0	0	0	0	0	0	0	0	0	0	0	0	0
222ccf015678f7a68550be00fcb57c78	otu1229	D_0__Bacteria;D_1__Planctomycetes;D_2__Planctomycetacia;D_3__Isosphaerales;D_4__Isosphaeraceae;D_5__uncultured;	0	0	0	0	0	2	0	0	0	0	0	0	0	0	0	0	0	0	0	0
222d5006383bb6402408e4d0b89c6139	otu1230	D_0__Bacteria	0	0	0	0	0	0	0	0	3	0	0	0	0	0	0	0	0	0	0	0
22386e3df9408405283e9408e5164095	otu1231	D_0__Bacteria	0	0	0	0	0	0	0	0	0	0	0	0	0	0	0	3	0	0	0	0
223e8c0630ae84544d79b92231a5ccfb	otu1232	D_0__Archaea;D_1__Euryarchaeota;D_2__Thermoplasmata;D_3__uncultured	0	0	0	0	0	0	0	0	0	0	0	0	0	0	0	0	0	1	0	0
224321cdba6e4f868277a90cf393ee3d	otu1233	D_0__Bacteria	0	0	0	4	0	0	0	0	0	0	0	0	0	0	0	10	0	0	0	0
2255cfe7b49d7d800bbaba3ead16de13	otu1234	D_0__Bacteria;D_1__Patescibacteria;D_2__Parcubacteria;D_3__uncultured bacterium;D_4__uncultured bacterium;D_5__uncultured bacterium;D_6__uncultured bacterium	109	121	81	63	22	14	0	11	33	0	0	0	0	0	0	188	0	0	0	0
225ce37dfed3ed42853fe1caa5621cbc	otu1235	D_0__Bacteria	0	0	0	0	0	0	0	0	0	0	0	0	0	0	0	0	0	0	3	0
2271a6ae0a420e3100e692c7a6792350	otu1236	D_0__Bacteria;D_1__Halanaerobiaeota;D_2__Halanaerobiia;D_3__Halanaerobiales;D_4__Halanaerobiaceae;D_5__Halarsenatibacter;D_6__uncultured Bacteroidetes bacterium	0	0	0	0	0	0	0	0	0	0	0	0	0	0	0	0	0	0	11	0
22767604a5d564eddffea922860da3a9	otu1237	D_0__Bacteria	0	0	0	0	0	0	0	0	0	0	0	0	0	0	0	11	0	0	0	0
228445f51fd2a6f6e85f924a8842c1cf	otu1238	D_0__Bacteria	0	0	0	0	0	0	0	0	0	0	0	0	0	0	0	5	0	0	0	0
228a7adc63be4ed8224d23080964f143	otu1239	D_0__Bacteria	0	0	0	0	3	0	0	0	0	0	0	0	0	0	0	0	0	0	0	0
228afab0aeefcc2380c4e4dcfab21505	otu1240	D_0__Bacteria	0	0	7	0	0	0	0	0	0	0	0	0	0	0	0	0	0	0	0	0
22931d7e8b380be79069222c9a298b69	otu1241	D_0__Bacteria	0	0	0	0	0	0	0	0	0	0	0	0	0	4	0	0	0	0	0	0
22951dd0e5a0130e8efdbceeae33bc6a	otu1242	D_0__Bacteria;D_1__Proteobacteria;D_2__Deltaproteobacteria;D_3__Desulfobacterales;D_4__Desulfobulbaceae;D_5__Desulfurivibrio;D_6__uncultured bacterium	0	0	2	0	0	0	0	0	0	0	0	0	0	0	0	0	0	0	0	0
2296f8bd5be255ef2cb8ee9390b84771	otu1243	D_0__Bacteria	0	0	0	0	0	0	0	0	0	0	0	11	0	0	0	0	0	0	0	0
22992cd50645ef60a0b9861981090ba5	otu1244	D_0__Bacteria;D_1__Lentisphaerae;D_2__Oligosphaeria;D_3__Oligosphaerales;D_4__Oligosphaeraceae;D_5__uncultured Verrucomicrobia bacterium;D_6__uncultured Verrucomicrobia bacterium	0	0	0	0	0	0	0	0	0	0	0	0	0	0	37	0	0	0	0	0
229cd341de23aadd069e853ba48d9cf7	otu1246	D_0__Archaea;D_1__Euryarchaeota;D_2__Halobacteria;D_3__Halobacteriales;D_4__uncultured;D_5__uncultured haloarchaeon;D_6__uncultured haloarchaeon	0	0	8	0	7	0	0	0	0	0	0	0	0	0	0	0	0	0	0	0
229dd49df2628d14c6497447b5740d25	otu1247	D_0__Bacteria;D_1__Proteobacteria;D_2__Deltaproteobacteria	7	0	10	0	12	0	0	0	0	0	0	9	0	12	0	0	0	0	0	0
22a24a9452859c0d4c0228a2b89f5055	otu1248	D_0__Bacteria	0	0	0	0	0	0	0	0	0	0	0	0	5	0	0	0	0	0	0	0
22a4c7cfaa495535491581ca778b0557	otu1249	D_0__Bacteria;D_1__Verrucomicrobia;D_2__Verrucomicrobiae;D_3__Pedosphaerales;D_4__Pedosphaeraceae;D_5__uncultured bacterium;D_6__uncultured bacterium	0	10	0	0	0	0	12	0	0	0	0	0	0	0	0	0	0	0	0	0
22aabd7b14f907ebd66c5a051e7b3098	otu1250	D_0__Archaea;D_1__Nanoarchaeaeota;D_2__Woesearchaeia	0	0	0	0	0	0	0	0	0	0	0	0	0	0	2	0	0	0	0	0
22adba7e6ad64bbb065585b43dc70353	otu1251	D_0__Bacteria;D_1__Patescibacteria;D_2__Parcubacteria;D_3__Paceibacterales;D_4__Paceibacteraceae;D_5__Candidatus Paceibacter;D_6__uncultured bacterium	72	269	112	408	73	3602	1192	2724	58	155	50	0	168	88	42	34	13	15	8	0
22b1f56b1fca900a733f60f854efab2d	otu1252	D_0__Archaea;D_1__Nanoarchaeaeota;D_2__Woesearchaeia;D_3__uncultured crenarchaeote;D_4__uncultured crenarchaeote;D_5__uncultured crenarchaeote;D_6__uncultured crenarchaeote	0	0	0	0	0	0	0	0	18	0	4	0	0	0	0	0	0	0	0	0
22bc0201e4ea6b5822032f635830c588	otu1253	D_0__Bacteria	0	0	0	0	0	0	0	0	0	0	0	0	0	0	0	2	0	0	0	0
22bd24c7d670b4003e6d72e1250491c8	otu1254	D_0__Bacteria	0	0	2	0	0	0	0	0	0	0	0	0	0	0	0	0	0	0	0	0
22bd73e7a9109fce6dafb4983266e36e	otu1255	D_0__Bacteria	0	0	0	0	0	0	0	0	0	0	0	0	0	0	0	0	0	0	39	0
22bda6f801ddccafb371b76c7187ebd6	otu1256	D_0__Bacteria	0	0	0	0	0	0	0	0	0	0	0	0	0	0	3	0	0	0	0	0
22dba21ef51398114391916d8f9ed903	otu1257	D_0__Archaea;D_1__Euryarchaeota;D_2__Halobacteria;D_3__Halobacteriales;D_4__Haloferacaceae;D_5__uncultured;D_6__uncultured archaeon	0	0	0	12	0	0	0	0	0	0	0	0	0	0	0	0	0	0	0	0
22e098d6f05a5c07a8ff460235b69245	otu1258	D_0__Bacteria;D_1__Firmicutes;D_2__Clostridia;D_3__Clostridiales;D_4__Syntrophomonadaceae;D_5__uncultured;D_6__uncultured low G+C Gram-positive bacterium	0	0	0	0	4	0	0	0	0	0	0	0	0	0	0	0	0	0	0	0
22e60a75a0c2a78149087bb60528250d	otu1259	D_0__Bacteria;D_1__Planctomycetes;D_2__Planctomycetacia;D_3__Isosphaerales;D_4__Isosphaeraceae;D_5__Singulisphaera;D_6__uncultured Planctomycetaceae bacterium	0	0	3	0	0	0	0	0	0	0	0	0	0	0	0	0	0	0	0	0
22e7f46a3a24ce6b974041b89e150696	otu1260	D_0__Bacteria	0	0	0	0	4	0	0	0	0	0	0	0	0	0	0	0	0	0	0	0
22e830d4a2e220496ff7ef6559bd498f	otu1261	D_0__Archaea;D_1__Euryarchaeota;D_2__Halobacteria;D_3__Halobacteriales;D_4__Haloferacaceae;D_5__Halorubrum;	0	0	0	0	0	0	0	0	0	0	0	0	0	0	0	0	0	0	2	0
22ee6eef7fff84378d9fabe11a70476d	otu1262	D_0__Bacteria	0	45	93	79	0	0	171	0	38	0	0	24	9	0	0	0	0	0	0	0
22f253719f4fc4740705143d4971d711	otu1263	D_0__Bacteria	0	0	0	0	0	0	0	0	7	0	0	0	0	0	0	0	0	0	0	0
22f4bcc76bd37915e591c567cbd89b45	otu1264	D_0__Bacteria	0	0	2	0	0	0	3	0	0	0	0	0	0	0	0	0	0	0	0	0
230d059c345dc040ff914c5dec9fcfea	otu1265	D_0__Bacteria	0	0	0	0	0	0	0	0	0	0	0	0	0	0	0	0	66	28	0	48
231f6e27e16df93183ceda5151b483e1	otu1267	D_0__Bacteria;D_1__Bacteroidetes;D_2__Bacteroidia;D_3__Bacteroidales	0	0	0	0	2	0	0	0	0	0	0	0	0	0	0	0	0	0	0	0
2320ea939cc8b1afe7f286d8e7ac75a2	otu1268	D_0__Bacteria	0	0	0	0	8	0	0	0	0	0	0	0	0	0	0	0	0	0	0	0
232439bc22d7f1b3cd349697c4558f1d	otu1269	D_0__Bacteria;D_1__Verrucomicrobia;D_2__Verrucomicrobiae;D_3__Pedosphaerales;D_4__Pedosphaeraceae;D_5__uncultured bacterium;D_6__uncultured bacterium	0	0	0	0	0	4	0	0	0	3	0	0	9	0	0	6	0	0	0	0
232b5a997a2d7bdbe619427333c9ca00	otu1270	D_0__Bacteria	0	0	0	0	0	0	0	0	0	0	0	4	0	0	0	0	0	0	0	0
232cc659194166e34f57097c85cbb76f	otu1271	D_0__Archaea;D_1__Nanoarchaeaeota;D_2__Woesearchaeia;D_3__uncultured euryarchaeote;D_4__uncultured euryarchaeote;D_5__uncultured euryarchaeote;D_6__uncultured euryarchaeote	0	0	4	0	0	0	0	8	0	0	0	0	0	0	0	0	0	0	0	0
232e07784c6231f4ee5c78c7cab6c378	otu1272	D_0__Bacteria	0	21	0	0	0	0	0	0	0	0	0	0	0	0	0	0	0	0	0	0
2331fc4724e55159e9d14714034f9d8e	otu1273	D_0__Archaea;D_1__Euryarchaeota;D_2__Halobacteria;D_3__Halobacteriales;D_4__uncultured;D_5__uncultured haloarchaeon;D_6__uncultured haloarchaeon	0	0	0	6	0	0	0	0	0	0	0	0	0	0	0	0	0	0	0	0
233a3e00ce588f22782aa940285953b8	otu1274	D_0__Bacteria;D_1__Firmicutes;D_2__Clostridia;D_3__Clostridiales;D_4__Syntrophomonadaceae;D_5__uncultured;D_6__uncultured Firmicutes bacterium	44	88	41	60	99	74	107	76	0	0	0	35	12	32	26	20	0	29	24	21
235c149347e4c91b498445184739530f	otu1275	D_0__Archaea;D_1__Nanoarchaeaeota;D_2__Woesearchaeia	0	0	0	0	0	6	0	0	0	0	0	0	0	0	0	0	0	0	0	0
236b0110b4902cae2bba52d70813a1cb	otu1276	D_0__Bacteria	7	0	0	3	0	0	0	0	0	0	0	0	0	0	0	0	0	0	0	0
236f8b6d3a74a9227452b2b16a0925a7	otu1277	D_0__Bacteria	0	0	0	0	0	0	0	0	0	0	5	0	0	0	0	0	0	0	0	0
2378f45767b5bf3c4a532588f8fd5d45	otu1278	D_0__Bacteria	0	0	3	0	0	0	0	0	0	0	0	0	0	0	0	0	0	0	0	0
237c810693b991f2882cb45abec71a05	otu1279	D_0__Bacteria;D_1__Proteobacteria;D_2__Deltaproteobacteria;D_3__Desulfobacterales;D_4__Desulfobulbaceae	0	0	0	0	0	0	0	0	0	0	0	0	0	0	3	0	0	0	0	0
2381b254db0d67561e2c464d05869349	otu1280	D_0__Bacteria	0	0	0	0	0	0	0	6	0	0	0	0	0	0	0	0	0	0	0	0
238a4603d3e24c684f49dbdbee6e3669	otu1281	D_0__Bacteria	0	0	0	0	0	0	0	0	0	9	0	0	0	0	0	0	0	0	0	0
238bbaec3aac1e6aaccc7850025a1f8c	otu1282	D_0__Bacteria;D_1__Firmicutes;D_2__Clostridia;D_3__Clostridiales;D_4__Syntrophomonadaceae;D_5__uncultured;D_6__uncultured low G+C Gram-positive bacterium	0	0	0	0	0	0	4	0	0	0	0	0	0	0	0	0	0	0	0	0
2391cbe0cff66bb7218c26022f4bf13b	otu1283	D_0__Bacteria	0	0	0	0	0	0	0	0	0	0	0	0	0	0	1	0	0	0	0	0
23961ff9ea1a07524663268024b6a962	otu1284	D_0__Bacteria;D_1__Patescibacteria;D_2__Parcubacteria;D_3__Candidatus Kaiserbacteria;D_4__uncultured organism;D_5__uncultured organism;D_6__uncultured organism	0	0	0	0	0	0	0	0	8	145	0	16	0	2	0	0	0	0	0	0
23a9452f3afc1088223430fb6ef33174	otu1285	D_0__Bacteria	0	0	0	2	0	0	0	0	0	0	0	0	0	0	0	0	0	0	0	0
23a9f21c498cf593ebdbf4c1c177dfe9	otu1286	D_0__Bacteria	0	0	0	0	0	4	0	0	0	0	0	0	0	0	0	0	0	0	0	0
23b8dde3c76eef2ac2b0ab75d3a2f9a1	otu1287	D_0__Bacteria	0	0	0	0	4	0	0	0	0	0	0	0	0	0	0	0	0	0	0	0
23cbfa982d8faa939339192daffb55a8	otu1288	D_0__Archaea;D_1__Euryarchaeota;D_2__Halobacteria;D_3__Halobacteriales;D_4__uncultured;D_5__uncultured haloarchaeon;D_6__uncultured haloarchaeon	0	0	0	0	0	0	17	0	0	0	0	0	0	0	0	0	0	0	0	0
23cd63462b8a4ed8f81332f44093d1e9	otu1289	D_0__Archaea;D_1__Euryarchaeota;D_2__Halobacteria;D_3__Halobacteriales;D_4__Haloferacaceae;D_5__uncultured;D_6__uncultured haloarchaeon	144	421	515	0	0	14	0	0	0	0	0	0	13	0	0	0	0	0	0	0
23d219aa60b1ca9adbb79e380ad63b16	otu1290	D_0__Bacteria;D_1__Kiritimatiellaeota;D_2__Kiritimatiellae;D_3__WCHB1-41;D_4__uncultured bacterium;D_5__uncultured bacterium;D_6__uncultured bacterium	0	0	0	0	0	0	0	0	4	6	3	0	0	0	0	0	0	0	0	0
23d2746a872dc5ac35de18f15f43fd88	otu1291	D_0__Bacteria;D_1__Proteobacteria;D_2__Gammaproteobacteria	0	0	0	0	0	0	0	0	0	0	5	0	0	0	0	0	0	0	0	0
23e0808390f6a68861541317bb137b37	otu1292	D_0__Archaea;D_1__Euryarchaeota;D_2__Halobacteria;D_3__Halobacteriales;D_4__Haloferacaceae;D_5__Natronorubrum;	0	0	0	0	0	0	0	6	0	0	0	0	0	0	0	0	0	0	0	0
23e4a79d7b687d018eae2ec5e280a841	otu1293	D_0__Bacteria;D_1__Patescibacteria;D_2__Parcubacteria;D_3__uncultured bacterium;D_4__uncultured bacterium;D_5__uncultured bacterium;D_6__uncultured bacterium	32	39	31	7	0	0	0	0	0	0	0	0	0	0	0	0	0	0	0	0
23e770c91aaf7c763039d05bc6a2073c	otu1294	D_0__Archaea;D_1__Euryarchaeota;D_2__Halobacteria;D_3__Halobacteriales;D_4__Haloferacaceae;D_5__Halorubrum;	20	20	0	21	0	0	44	34	57	36	99	131	484	304	776	39	211	581	533	189
23edf6bfc70425fa45d0df821f6f6c73	otu1295	D_0__Archaea;D_1__Thaumarchaeota;D_2__Nitrososphaeria;D_3__Nitrosopumilales;D_4__Nitrosopumilaceae;D_5__Candidatus Nitrosopumilus;	0	0	0	0	0	0	0	0	0	0	0	0	16	0	0	0	0	0	0	0
23eeb8e777dfd84c81bfd7e3637b42d5	otu1296	D_0__Archaea;D_1__Nanoarchaeaeota;D_2__Woesearchaeia;D_3__uncultured crenarchaeote;D_4__uncultured crenarchaeote;D_5__uncultured crenarchaeote;D_6__uncultured crenarchaeote	0	0	0	0	0	5	0	0	0	0	0	0	0	0	0	0	0	0	0	0
24048a95c3f06ae5d76b3903a9b31d4c	otu1297	D_0__Bacteria;D_1__Planctomycetes;D_2__Planctomycetacia;D_3__Pirellulales;D_4__Pirellulaceae;D_5__uncultured;D_6__uncultured bacterium	0	0	0	0	0	0	0	0	0	0	0	0	0	0	0	12	0	0	0	0
24118265727aa56b99efef8958b80938	otu1298	D_0__Bacteria;D_1__Planctomycetes;D_2__Planctomycetacia;D_3__Planctomycetales;D_4__uncultured;D_5__uncultured bacterium;D_6__uncultured bacterium	0	0	0	0	0	0	0	0	0	0	5	0	0	0	0	0	0	0	0	0
24342086876bbff3d7833bedbd7d6946	otu1299	D_0__Bacteria	0	0	2	0	0	0	0	0	0	0	0	0	0	0	0	0	0	0	0	0
243cd55d9ea6bd29d730813f4e6b3c11	otu1301	D_0__Archaea;D_1__Euryarchaeota;D_2__Halobacteria;D_3__Halobacteriales;D_4__Haloferacaceae;D_5__Natronorubrum;D_6__uncultured haloarchaeon	4	14	11	0	14	0	22	0	30	0	0	33	0	53	0	14	0	0	0	0
243dfe4bcf51fed334fa1c708dc06202	otu1302	D_0__Bacteria	0	0	0	1	0	0	0	0	0	0	0	0	0	0	0	0	0	0	0	0
24401a319127e80e6744ea0e045b3765	otu1303	D_0__Bacteria	0	0	0	0	0	0	0	0	0	0	0	3	0	0	0	0	0	0	0	0
2445d5c6164d18c32c30f4b07cd13b0d	otu1304	D_0__Bacteria;D_1__Bacteroidetes;D_2__Bacteroidia;D_3__Bacteroidales	0	0	0	0	0	0	6	0	0	0	0	0	0	0	0	0	0	0	0	0
24514595c9cca66e21d58d8c6f4a9fa3	otu1305	D_0__Bacteria;D_1__Lentisphaerae;D_2__Oligosphaeria;D_3__Oligosphaerales;D_4__Oligosphaeraceae;D_5__SBZC-1223;D_6__uncultured organism	78	152	87	56	152	59	168	141	96	0	0	0	67	0	15	160	0	0	0	0
245fb5bd0037407ab80c5e41b53bdd1b	otu1306	D_0__Bacteria	0	0	0	0	0	0	0	0	0	0	0	0	0	0	0	0	0	3	0	0
246219178a97c4c4a041876b2f95ac16	otu1307	D_0__Bacteria;D_1__Firmicutes	0	0	0	0	0	0	0	0	0	10	0	0	0	0	5	0	0	0	0	0
247fd932c57f0cd0d88c460cd61d2d4a	otu1308	D_0__Bacteria	0	5	0	0	0	0	0	0	0	0	0	0	0	0	0	0	0	0	0	0
248185a5a265c3ac329078c96b4a0615	otu1309	D_0__Archaea;D_1__Nanoarchaeaeota;D_2__Woesearchaeia	0	0	3	0	0	0	0	0	52	0	4	0	0	0	0	0	0	0	0	0
248fb80bae108b6502735e8af95e807f	otu1310	D_0__Archaea;D_1__Euryarchaeota;D_2__Halobacteria;D_3__Halobacteriales;D_4__uncultured;D_5__uncultured haloarchaeon;D_6__uncultured haloarchaeon	0	0	0	0	9	12	8	0	0	0	0	0	0	0	0	0	0	0	0	0
249ed6b1e4358193c27d27c6caf37109	otu1311	D_0__Bacteria	0	0	0	0	0	0	0	0	0	0	0	0	0	0	0	0	9	0	0	0
24a9a7fc5003308130b6114eab498825	otu1312	D_0__Bacteria;D_1__Planctomycetes;D_2__OM19	18	102	108	824	39	39	45	0	16	0	0	83	0	0	0	0	0	0	0	0
24aa20ed611bd4713fdd0534877a0cb1	otu1313	D_0__Archaea;D_1__Diapherotrites;D_2__Iainarchaeia;D_3__unidentified archaeon;D_4__unidentified archaeon;D_5__unidentified archaeon;D_6__unidentified archaeon	10	10	0	382	0	0	0	0	0	0	0	0	0	0	0	4	0	3	0	0
24ac98c30595520268f84212d8bf4793	otu1314	D_0__Bacteria;D_1__Planctomycetes;D_2__Planctomycetacia;D_3__Pirellulales;D_4__Pirellulaceae;D_5__Pirellula;	78	246	335	0	250	12	128	39	0	0	0	0	0	0	0	0	0	0	0	0
24ae22a938a796ec90bbb5202eb94426	otu1315	D_0__Bacteria;D_1__Bacteroidetes;D_2__Bacteroidia;D_3__Bacteroidales;D_4__ML635J-4 aquatic group;D_5__uncultured haloalkaliphilic bacterium;D_6__uncultured haloalkaliphilic bacterium	0	0	0	0	0	0	4	0	0	0	0	0	0	0	0	0	0	0	0	0
24b54ba51febad59fb9969b759fd28c4	otu1316	D_0__Bacteria	0	0	1	0	0	0	0	0	0	0	0	0	0	0	0	0	0	0	0	0
24b8c229a9665c3ea82737457af9006e	otu1317	D_0__Bacteria	0	0	0	0	3	0	3	0	0	0	0	0	0	0	0	0	0	0	0	0
24bcd33e01cfc27680f716c4cb4444c5	otu1318	D_0__Bacteria	0	0	0	0	0	0	0	0	0	0	0	1	0	0	0	0	0	0	0	0
24bdd0fef37357e64e95c033c88a5093	otu1319	D_0__Bacteria	0	0	0	0	0	0	0	0	0	0	0	0	0	0	0	0	0	4	0	0
24bf475ac6ebd00e07aac9acceb56649	otu1320	D_0__Bacteria;D_1__Actinobacteria;D_2__Actinobacteria;D_3__Micrococcales;D_4__Micrococcaceae;D_5__Arthrobacter;	0	0	0	0	0	0	0	0	0	0	0	0	0	0	0	0	3	0	0	0
24c18fcb5c07009ac38180d6e3e409ed	otu1321	D_0__Bacteria;D_1__Firmicutes;D_2__Clostridia	0	0	0	0	0	0	0	0	0	0	0	0	0	0	0	0	0	0	6	0
24ca06bb2d2380ce0e3e01e26c665bd9	otu1322	D_0__Bacteria;D_1__Firmicutes;D_2__Clostridia;D_3__Clostridiales;D_4__Clostridiaceae 1;D_5__Clostridium sensu stricto 12;D_6__uncultured Clostridiales bacterium	0	0	0	0	1	0	0	0	0	0	0	0	0	0	0	0	0	0	0	0
24d01639d1c9ac1b3d4345ec14360d37	otu1323	D_0__Bacteria	0	0	0	0	0	0	0	0	0	0	0	0	0	0	0	0	0	4	0	0
24da0093d08034138cc736cb112826cb	otu1324	D_0__Bacteria	8	8	0	0	0	0	0	0	0	0	0	0	0	0	0	0	0	0	0	0
24ed4c62262857fdfd799cd43aba9789	otu1325	D_0__Archaea;D_1__Euryarchaeota;D_2__Halobacteria;D_3__Halobacteriales;D_4__Halomicrobiaceae;D_5__Natronomonas;	0	0	0	0	0	0	0	0	35	0	0	0	328	87	221	23	67	40	93	18
24f20b915b3104949e090b1762e973b7	otu1326	D_0__Bacteria	0	0	0	0	0	0	0	0	0	0	0	6	0	0	0	0	0	0	0	0
24f492a91f167d56264f01b13600d81b	otu1327	D_0__Bacteria;D_1__Planctomycetes;D_2__vadinHA49;D_3__uncultured bacterium;D_4__uncultured bacterium;D_5__uncultured bacterium;D_6__uncultured bacterium	0	0	0	0	2	0	0	0	0	0	0	0	0	0	0	2	0	0	0	0
250304d6a863593e4a32582a5133c372	otu1328	D_0__Bacteria;D_1__Planctomycetes;D_2__Planctomycetacia;D_3__Pirellulales;D_4__Pirellulaceae;D_5__uncultured;D_6__uncultured Planctomycetaceae bacterium	0	0	0	0	0	3	0	0	0	0	0	0	0	0	0	0	0	0	0	0
2503955ad84a26362d3c214cf6af6516	otu1329	D_0__Archaea;D_1__Nanoarchaeaeota;D_2__Woesearchaeia	0	0	0	0	0	0	0	0	2	0	0	4	2	0	3	0	0	0	0	0
25089052021a2b1f1242adf352ea00a0	otu1330	D_0__Bacteria	0	3	0	0	0	0	0	0	0	0	0	0	0	0	0	0	0	0	0	0
251e9b2ef8c7f908a38518d5733b8bd5	otu1331	D_0__Bacteria;D_1__Planctomycetes;D_2__Planctomycetacia;D_3__Pirellulales;D_4__Pirellulaceae;D_5__uncultured;D_6__uncultured bacterium	0	0	0	6	0	0	0	0	0	0	0	0	0	0	0	0	0	0	0	0
25287453750245f748e97b3ddfe51dd8	otu1332	D_0__Archaea;D_1__Euryarchaeota;D_2__Halobacteria;D_3__Halobacteriales	0	10	0	0	0	0	0	0	0	0	0	0	0	0	0	0	0	0	0	0
253b57912d52765a6df6b2150fc09462	otu1333	D_0__Bacteria	0	0	0	0	0	0	0	0	0	0	0	0	17	0	0	0	0	0	0	0
2545cff2a8600c0d68cef4aad446f457	otu1334	D_0__Bacteria	0	0	0	2	0	0	0	0	0	0	0	0	0	0	0	0	0	0	0	0
25555016f6a5c10a636267e49dba3d65	otu1335	D_0__Archaea;D_1__Euryarchaeota;D_2__Halobacteria;D_3__Halobacteriales;D_4__Haloferacaceae;D_5__uncultured;	17	0	0	0	0	0	0	0	0	0	0	0	0	0	0	0	0	0	0	0
2555ff0ab9763a079dd17880ccf0d11c	otu1336	D_0__Bacteria;D_1__Omnitrophicaeota;D_2__uncultured bacterium;D_3__uncultured bacterium;D_4__uncultured bacterium;D_5__uncultured bacterium;D_6__uncultured bacterium	0	343	115	235	0	0	0	3	0	0	0	0	0	0	0	0	0	0	0	0
2559a66f605c550589b3c348184d29c0	otu1337	D_0__Archaea;D_1__Euryarchaeota;D_2__Halobacteria;D_3__Halobacteriales;D_4__Haloferacaceae;D_5__Natronobacterium;D_6__Natronobacterium texcoconense	0	0	0	0	0	0	0	0	0	0	0	0	5	20	24	0	0	0	0	0
255a5176b7b7bf1cac99de218b935e1d	otu1338	D_0__Bacteria	0	0	1	0	0	0	0	0	0	0	0	0	0	0	0	0	0	0	0	0
256afeb25fcd0634917b774a70e40cd1	otu1339	D_0__Archaea;D_1__Euryarchaeota;D_2__Halobacteria;D_3__Halobacteriales;D_4__Halomicrobiaceae;D_5__Natronomonas;	0	0	0	0	0	0	0	0	0	0	0	0	0	0	0	0	0	14	0	0
256e7219def3fb8f9460d76191f22b96	otu1340	D_0__Bacteria;D_1__Bacteroidetes;D_2__Bacteroidia;D_3__Cytophagales;D_4__Cytophagaceae;D_5__Sporocytophaga;D_6__uncultured bacterium	0	0	0	0	0	0	10	0	0	0	0	0	0	0	0	0	0	0	0	0
256f682e77522e88eb0f7e9d599eaa4b	otu1341	D_0__Bacteria	0	0	0	0	0	0	0	0	0	0	1	0	0	0	0	0	0	0	0	0
257278c1afe9de180cf89992db37b87d	otu1342	D_0__Archaea;D_1__Nanoarchaeaeota;D_2__Woesearchaeia;D_3__uncultured archaeon;D_4__uncultured archaeon;D_5__uncultured archaeon;D_6__uncultured archaeon	0	0	0	5	0	0	0	13	0	0	0	0	0	0	0	0	0	0	0	0
25738fbd5faf7f5091656d5b83bc06bb	otu1343	D_0__Bacteria;D_1__Hydrogenedentes;D_2__Hydrogenedentia;D_3__Hydrogenedentiales;D_4__Hydrogenedensaceae;D_5__uncultured bacterium;D_6__uncultured bacterium	4	0	0	0	0	0	0	0	0	0	0	0	0	0	0	0	0	0	0	0
25879738f9a17719efb973e37069cbcf	otu1344	D_0__Bacteria;D_1__Actinobacteria;D_2__Nitriliruptoria;D_3__Nitriliruptorales;D_4__Nitriliruptoraceae	0	0	0	0	5	0	0	0	0	0	0	0	0	0	0	0	0	0	0	0
2588cfbef6843b17f332fff2524bd958	otu1345	D_0__Archaea;D_1__Euryarchaeota;D_2__Halobacteria;D_3__Halobacteriales;D_4__Halomicrobiaceae;D_5__uncultured;D_6__uncultured archaeon	0	10	0	0	0	0	0	0	0	0	0	0	0	0	0	0	0	0	0	0
258a1fd81abc4a0532f471032c3d0c2e	otu1346	D_0__Bacteria	0	1	0	0	4	0	0	0	0	0	0	0	0	0	0	0	0	0	0	0
258c20dffb8c981e85a5ee6f300d167e	otu1347	D_0__Bacteria;D_1__Omnitrophicaeota;D_2__uncultured organism;D_3__uncultured organism;D_4__uncultured organism;D_5__uncultured organism;D_6__uncultured organism	0	0	0	14	0	0	0	0	0	0	0	0	0	0	0	0	0	0	0	0
259650ca5e326e88140e8485cb6f866f	otu1349	D_0__Archaea;D_1__Euryarchaeota;D_2__Halobacteria;D_3__Halobacteriales;D_4__Haloferacaceae;D_5__Halobiforma;	0	0	0	0	0	0	0	0	0	0	0	0	0	0	0	0	0	0	4	0
259b070857c165b665cdbc9fb7c8d094	otu1350	D_0__Archaea;D_1__Nanoarchaeaeota;D_2__Nanohaloarchaeia	0	0	0	0	0	0	4	0	0	0	0	0	0	5	2	0	0	0	0	0
25afef22572b26e7007fcee2ae914560	otu1351	D_0__Archaea;D_1__Nanoarchaeaeota;D_2__Woesearchaeia	0	0	0	0	99	0	64	0	0	0	0	0	0	0	0	0	0	0	0	0
25b0bfd284e3a7c01cebc201175ecf7e	otu1352	D_0__Archaea;D_1__Euryarchaeota;D_2__Halobacteria;D_3__Halobacteriales;D_4__Haloferacaceae;D_5__uncultured;D_6__Halovarius sp.	23	0	44	0	0	0	0	0	0	0	0	0	0	20	0	0	0	0	0	0
25b0c0d86d70b42cb52bfd83c3378a47	otu1353	D_0__Bacteria	0	0	0	0	0	2	0	0	22	0	0	0	0	0	0	0	0	0	0	0
25b9af41f4a6dfa0d351e0dd129f8666	otu1354	D_0__Bacteria	0	0	0	0	0	0	6	0	0	0	0	0	0	0	0	0	0	0	0	0
25bcfec750244edb9ea2aa39e3ce6dfb	otu1355	D_0__Bacteria;D_1__Planctomycetes;D_2__Planctomycetacia;D_3__Pirellulales;D_4__Pirellulaceae	1	0	0	0	0	0	0	0	0	0	0	0	0	0	0	0	0	0	0	0
25d5f0ff081f9934b3a037b46ec616a8	otu1356	D_0__Bacteria	0	0	0	0	0	14	0	0	0	0	0	0	0	0	0	0	0	0	0	0
25e7bf1dddda9a7972455d07afc3b1f2	otu1357	D_0__Bacteria	0	1	0	0	0	0	0	0	0	0	0	0	0	0	0	0	0	0	0	0
25eba5cb39eeb65032b0e2bb53f5fcd9	otu1358	D_0__Bacteria;D_1__Kiritimatiellaeota;D_2__Kiritimatiellae;D_3__WCHB1-41;D_4__uncultured bacterium;D_5__uncultured bacterium;D_6__uncultured bacterium	0	0	0	0	0	0	0	0	0	0	0	1	0	0	0	0	0	0	0	0
25f3ee6cfb57447b15955d0ea3829172	otu1359	D_0__Bacteria;D_1__Firmicutes;D_2__Clostridia;D_3__Thermoanaerobacterales;D_4__Thermoanaerobacteraceae;D_5__Thermoanaerobacter;	0	0	0	0	0	9	0	0	0	0	0	0	18	0	0	0	0	0	0	0
25f52030b5e775ed8f054da41a87740f	otu1360	D_0__Archaea;D_1__Euryarchaeota;D_2__Halobacteria;D_3__Halobacteriales;D_4__Haloferacaceae;D_5__uncultured;D_6__uncultured haloarchaeon	0	0	0	0	0	0	0	0	0	0	0	26	0	0	0	0	0	0	0	0
25f85151d4b29ad9fbee1dcdaf642b40	otu1361	D_0__Bacteria;D_1__Firmicutes;D_2__Clostridia;D_3__D8A-2	0	0	0	0	0	0	0	0	0	0	0	0	0	0	0	4	0	0	0	0
25fa62391a14ed230bf8bf29b7b3a246	otu1362	D_0__Bacteria;D_1__Planctomycetes;D_2__Phycisphaerae;D_3__Phycisphaerales;D_4__AKAU3564 sediment group;D_5__uncultured organism;D_6__uncultured organism	0	0	8	0	0	0	0	0	0	0	0	0	0	0	0	0	0	0	0	0
260466bf00cfa3eccab0e89a6bae2f98	otu1363	D_0__Bacteria;D_1__Bacteroidetes;D_2__Bacteroidia;D_3__Cytophagales;D_4__Cyclobacteriaceae;D_5__uncultured;	1	0	0	0	0	0	0	0	0	0	0	0	0	0	0	0	0	0	0	0
260836f6372ea9e76ecc521f7b4cccf2	otu1364	D_0__Bacteria;D_1__Proteobacteria;D_2__Deltaproteobacteria;D_3__Desulfobacterales;D_4__Desulfobulbaceae;D_5__Desulfurivibrio;D_6__uncultured bacterium	0	0	0	0	0	0	0	0	0	0	0	0	0	0	3	0	0	0	0	0
260b11dcf4b4152f72003474c58a06ad	otu1365	D_0__Bacteria;D_1__Kiritimatiellaeota;D_2__Kiritimatiellae;D_3__WCHB1-41	0	17	0	0	0	0	0	0	0	0	0	0	0	0	0	0	0	0	0	0
260dea25a855d918a5f53ae5cf8fb58e	otu1366	D_0__Bacteria;D_1__Chlamydiae;D_2__Chlamydiae;D_3__Chlamydiales;D_4__Simkaniaceae	0	0	1	0	0	0	0	0	0	0	0	0	0	0	39	0	0	0	0	0
26379b1e5baf7d4c7ad8c999f18e4e57	otu1367	D_0__Bacteria;D_1__Planctomycetes;D_2__Planctomycetacia;D_3__Pirellulales;D_4__Pirellulaceae;D_5__uncultured;D_6__uncultured soil bacterium	0	0	0	0	0	0	0	3	0	0	0	0	0	0	0	0	0	0	0	0
263b161207752440b58ba84a5a9c7926	otu1368	D_0__Bacteria;D_1__Firmicutes;D_2__Clostridia;D_3__Clostridiales;D_4__Syntrophomonadaceae;D_5__uncultured;D_6__uncultured low G+C Gram-positive bacterium	0	0	0	0	0	0	0	0	0	0	0	0	0	0	0	0	0	11	2	0
26450226a9bb1bad5b4909a449c89b81	otu1370	D_0__Bacteria;D_1__Patescibacteria;D_2__Parcubacteria	0	6	11	0	0	0	0	0	4	0	4	0	0	0	0	0	0	0	0	0
2645e4c8174a096e10bdb9503f1c029c	otu1371	D_0__Bacteria	7	0	0	0	8	7	16	21	6	0	7	0	5	0	0	0	0	0	0	0
26502fb505539927a01b6383c8988326	otu1372	D_0__Bacteria	0	0	0	0	0	0	0	2	0	0	0	0	0	0	0	0	0	0	0	0
265f03aa642072b239104ab7a8ab90b5	otu1373	D_0__Archaea;D_1__Nanoarchaeaeota;D_2__Woesearchaeia	0	0	0	0	0	0	0	0	44	23	11	50	2	0	0	0	0	0	0	0
2661cdb81feb122bf11bb94b6bb332e1	otu1374	D_0__Archaea;D_1__Euryarchaeota;D_2__Halobacteria;D_3__Halobacteriales;D_4__Haloferacaceae;D_5__Halopiger;D_6__uncultured haloarchaeon	0	0	0	0	0	0	0	0	0	0	0	0	0	17	0	0	0	0	0	0
2665b89f93a497d8d37c5bab4c83c9e2	otu1375	D_0__Bacteria	0	3	0	0	0	0	0	0	0	0	0	0	0	0	0	0	0	0	0	0
266a2c857a4050b71e234ae4419f5ed2	otu1376	D_0__Bacteria;D_1__Patescibacteria;D_2__Parcubacteria;D_3__Candidatus Lloydbacteria;D_4__uncultured bacterium;D_5__uncultured bacterium;D_6__uncultured bacterium	0	0	0	0	0	11	0	0	0	0	0	0	0	0	0	0	4	0	0	0
26764077651dcbda3e165d456d23fbb6	otu1377	D_0__Bacteria;D_1__Firmicutes;D_2__Clostridia;D_3__Thermoanaerobacterales;D_4__Thermoanaerobacteraceae	0	0	0	0	0	0	0	0	0	0	0	0	0	0	0	0	0	0	8	0
268ac63064ac3fc1ee78454d536e62c3	otu1378	D_0__Bacteria	0	0	0	0	0	0	0	0	0	0	0	0	0	0	0	8	0	0	0	0
268f7b44c2b38bf9d9f895df923b663b	otu1379	D_0__Archaea;D_1__Thaumarchaeota;D_2__Nitrososphaeria;D_3__Nitrosopumilales;D_4__Nitrosopumilaceae	0	0	0	0	9	0	0	0	0	0	0	0	0	0	0	0	0	0	0	0
2692e584c182672ae463a7809e693c27	otu1380	D_0__Archaea;D_1__Nanoarchaeaeota;D_2__Nanohaloarchaeia;D_3__Nanohaloarchaeales;D_4__Nanohaloarchaeaceae;D_5__uncultured haloarchaeon;D_6__uncultured haloarchaeon	0	0	0	0	0	8	0	0	0	0	0	0	0	0	0	0	0	0	0	0
2698a27ce627d5aa5fc54aca12edbe19	otu1381	D_0__Bacteria	0	0	0	0	0	0	0	0	0	0	0	0	1	0	0	0	0	0	0	0
269acbf2de6b4725753543510cc9042b	otu1382	D_0__Bacteria	0	0	0	0	0	0	1	0	0	0	0	0	0	0	0	0	0	0	0	0
269c8592c0b0e8c5637620b3e3b4c21f	otu1383	D_0__Bacteria	0	0	0	0	0	0	0	0	0	0	0	0	3	0	0	0	6	0	0	0
269c9a34e7568a4a7b5ccfa6a69f038c	otu1384	D_0__Bacteria	0	0	0	23	0	0	0	0	0	0	0	0	0	0	0	0	0	0	0	0
26b94a743245ff787bbe709dc205e83b	otu1385	D_0__Bacteria;D_1__Deinococcus-Thermus;D_2__Deinococci;D_3__Deinococcales;D_4__Trueperaceae;D_5__Truepera;D_6__uncultured microorganism	0	37	39	40	0	0	9	20	0	0	0	10	0	0	0	4	0	0	0	0
26c58b02517176d7674a9700e3622437	otu1386	D_0__Archaea;D_1__Euryarchaeota;D_2__Methanomicrobia;D_3__Methanomicrobiales;D_4__Methanocorpusculaceae;D_5__Methanocalculus;	6	0	0	0	0	0	0	0	0	0	0	0	0	0	0	0	0	0	0	0
26ca404aba58fba803d1be4f5b5e50c9	otu1387	D_0__Bacteria;D_1__Omnitrophicaeota;D_2__uncultured bacterium;D_3__uncultured bacterium;D_4__uncultured bacterium;D_5__uncultured bacterium;D_6__uncultured bacterium	0	4	15	15	0	0	0	0	0	0	0	0	0	0	0	0	0	0	0	0
26cdad69d89dfdf35c7788bed9fd55aa	otu1388	D_0__Bacteria	0	1	0	0	0	0	0	0	0	0	0	0	0	0	0	0	0	0	0	0
26cfced3c92c49f3733205cb5097f99d	otu1389	D_0__Bacteria;D_1__Planctomycetes;D_2__ODP123;D_3__uncultured organism;D_4__uncultured organism;D_5__uncultured organism;D_6__uncultured organism	0	0	0	0	0	0	0	0	0	0	0	0	8	0	0	0	0	0	0	0
26ea5b7f97f3d7625a53086f9aecb9a9	otu1390	D_0__Bacteria;D_1__Planctomycetes;D_2__OM19;D_3__uncultured organism;D_4__uncultured organism;D_5__uncultured organism;D_6__uncultured organism	0	0	0	0	7	0	5	0	0	0	0	0	14	80	0	0	0	0	0	0
26ee039b3a8cf5d15bfd4a4b478581c6	otu1391	D_0__Bacteria	0	0	0	0	0	0	0	0	0	0	0	0	0	0	6	0	0	0	0	0
26f05dc5bf7b9909cee2477d9a4acf15	otu1392	D_0__Archaea;D_1__Euryarchaeota;D_2__Thermoplasmata;D_3__Methanomassiliicoccales;D_4__Methanomethylophilaceae;D_5__uncultured;D_6__uncultured euryarchaeote	217	13	43	0	134	6	76	0	0	0	0	0	0	86	0	0	0	0	0	0
26f18a19ed9c0797e620c81c1bceccc4	otu1393	D_0__Bacteria	0	0	0	0	0	0	0	0	0	0	0	0	0	0	0	2	0	0	0	0
27072e79c91eb785376ee828e78642de	otu1394	D_0__Bacteria	0	0	0	0	0	0	0	0	0	0	0	2	0	0	0	0	0	0	0	0
27118ded61b3e04a9a0b929c749d161f	otu1395	D_0__Bacteria;D_1__Patescibacteria;D_2__Parcubacteria;D_3__uncultured bacterium;D_4__uncultured bacterium;D_5__uncultured bacterium;D_6__uncultured bacterium	12	32	16	10	63	32	74	11	91	169	113	0	90	932	397	0	251	493	379	2560
271440606a9dff2f795bbb4cd9afb501	otu1396	D_0__Bacteria;D_1__Halanaerobiaeota;D_2__Halanaerobiia;D_3__Halanaerobiales;D_4__Halanaerobiaceae;D_5__Halanaerobium;D_6__uncultured Firmicutes bacterium	0	0	0	0	0	23	0	34	0	55	0	0	0	0	17	0	0	0	0	0
2714ab622557a794d0955fc74abfb6c5	otu1397	D_0__Bacteria	0	0	1	0	0	0	0	0	0	0	0	0	0	0	0	0	0	0	0	0
27181b3caa5f5688cee991aebde8e065	otu1398	D_0__Archaea;D_1__Euryarchaeota;D_2__Halobacteria;D_3__Halobacteriales	0	0	0	0	0	0	0	0	0	0	0	0	0	0	0	0	0	23	8	0
272d8d73de4312775aed5a867beee196	otu1399	D_0__Bacteria;D_1__Firmicutes;D_2__Clostridia;D_3__Clostridiales;D_4__Syntrophomonadaceae;D_5__uncultured;D_6__uncultured low G+C Gram-positive bacterium	7	11	20	6	19	0	11	0	0	0	0	0	0	0	5	0	0	0	0	0
27338c386fd021b8c470330a2e43ba57	otu1400	D_0__Bacteria	0	0	0	0	0	0	0	0	0	0	0	0	0	0	0	0	12	0	0	0
274b5018fb0390dd1ad093739701ffbd	otu1401	D_0__Bacteria	0	0	0	0	0	0	0	0	0	0	0	0	0	0	0	41	0	0	0	0
274f4bb72f0c4f88848018007c11b8a6	otu1402	D_0__Bacteria	0	0	0	0	0	0	7	0	0	0	0	0	0	0	0	0	0	0	0	0
2758c63f2eb662391f63c5139aaf24bb	otu1403	D_0__Bacteria	0	0	0	0	0	0	0	0	0	0	0	1	0	0	0	0	0	0	0	0
275de7eefb30bec74a574ed1c3ac885c	otu1404	D_0__Bacteria	0	0	0	0	0	0	0	0	0	0	0	4	0	0	0	0	0	0	0	0
27710e0f61c4905b5c662279b7dd0481	otu1406	D_0__Archaea;D_1__Nanoarchaeaeota;D_2__Woesearchaeia	0	0	0	0	0	0	0	0	5	0	0	0	0	0	0	0	0	0	0	0
277176a9d4ae4d7e770cd7fb746e21bf	otu1407	D_0__Archaea;D_1__Euryarchaeota;D_2__Halobacteria;D_3__Halobacteriales;D_4__Haloferacaceae	0	8	0	0	0	0	0	0	0	0	0	0	0	0	0	0	0	0	0	0
277c5305b422ebf869fec86b6f8a1e46	otu1408	D_0__Bacteria	0	0	0	0	0	0	0	0	0	0	0	0	0	0	6	0	0	0	0	0
2780a5a69f31fc81a44fe0ecac239e68	otu1409	D_0__Bacteria	0	0	0	0	0	0	0	0	0	0	0	0	0	0	0	13	0	0	0	0
279b3c8a6b58a52fa541d9c68d1d6a07	otu1410	D_0__Bacteria;D_1__Planctomycetes;D_2__Planctomycetacia;D_3__Pirellulales;D_4__Pirellulaceae;D_5__Pir4 lineage;	0	0	0	0	0	0	0	1	0	0	0	0	0	0	0	0	0	0	0	0
279e14d90727a238e3fe09e31442f3ef	otu1411	D_0__Bacteria	0	0	0	6	0	0	0	0	0	0	0	0	0	0	0	0	0	0	0	0
27a55a6b18580a5c0429406ce5285b0f	otu1412	D_0__Bacteria;D_1__Omnitrophicaeota;D_2__uncultured Omnitrophica bacterium;D_3__uncultured Omnitrophica bacterium;D_4__uncultured Omnitrophica bacterium;D_5__uncultured Omnitrophica bacterium;D_6__uncultured Omnitrophica bacterium	0	0	8	2	0	0	0	0	0	0	0	0	0	0	0	0	0	0	0	0
27bca21dbeda6b1a4db15866ebc913c7	otu1414	D_0__Bacteria	0	0	0	0	0	3	0	0	0	0	0	0	0	0	0	0	0	0	0	0
27bfd7909b37d3a43aa0ed17b77c003e	otu1415	D_0__Bacteria;D_1__Planctomycetes;D_2__Planctomycetacia;D_3__Isosphaerales;D_4__Isosphaeraceae	0	0	0	0	0	0	0	0	0	0	0	0	7	0	0	0	0	0	0	0
27c24f183a7d8b0581b0b29ea9519fb1	otu1416	D_0__Bacteria	0	0	0	0	0	10	2	0	0	0	0	17	0	0	0	0	0	0	0	0
27c8c0b3e9a1ec676bd9a7907eac7036	otu1417	D_0__Bacteria	7	4	0	1	0	0	0	5	0	0	0	0	0	0	0	0	0	0	0	0
27c8ca48ac0ea0e3dd90432f849a8609	otu1418	D_0__Bacteria	0	0	0	0	0	0	0	0	0	8	0	0	0	0	0	0	0	0	0	0
27d5662b68fcbf57d34280a3747ba07f	otu1419	D_0__Bacteria	0	7	0	0	0	0	0	0	0	0	0	0	0	0	0	0	0	0	0	0
27da9512f54d4e727b1c25fdf8f010f5	otu1420	D_0__Bacteria;D_1__Planctomycetes;D_2__Planctomycetacia;D_3__Pirellulales;D_4__Pirellulaceae;D_5__uncultured;D_6__uncultured bacterium	0	0	0	0	0	0	6	0	0	0	0	0	0	0	0	0	0	0	0	0
27e3f5cb1a99281348edb2224baaadd9	otu1421	D_0__Bacteria;D_1__Firmicutes;D_2__Clostridia	0	0	0	0	0	0	0	6	0	0	0	0	0	0	0	0	0	0	0	0
27e94cede324f57df35460a2b3015f6d	otu1422	D_0__Bacteria;D_1__Proteobacteria;D_2__Deltaproteobacteria;D_3__Desulfovibrionales	0	0	0	0	0	0	6	0	0	0	0	0	0	0	0	0	0	0	0	0
27f8bfa92f83cdd8a70d3ccecefbf7e5	otu1423	D_0__Bacteria	0	0	0	0	0	0	0	0	0	0	0	0	2	0	0	0	0	0	0	0
28067f0d50f2bf9ba69ef2b9d81ce48c	otu1424	D_0__Bacteria	0	0	0	0	0	0	0	0	1	0	0	0	0	0	0	0	0	0	0	0
28214ea8ad4231467f08b97d0e6e790d	otu1425	D_0__Archaea;D_1__Euryarchaeota;D_2__Halobacteria;D_3__Halobacteriales;D_4__Haloferacaceae;D_5__Halohasta;D_6__uncultured archaeon	85	117	96	188	0	601	55	65	635	165	418	153	208	178	265	0	11	0	33	0
2828a59cdd10f3360379fc343e115b89	otu1426	D_0__Bacteria;D_1__Patescibacteria;D_2__Parcubacteria;D_3__Candidatus Kaiserbacteria;D_4__uncultured organism;D_5__uncultured organism;D_6__uncultured organism	0	0	0	0	0	0	0	30	0	8	0	0	0	0	0	0	0	0	0	0
282b8cac6a6e6d6194f5501e7e05328a	otu1427	D_0__Archaea;D_1__Euryarchaeota;D_2__Halobacteria;D_3__Halobacteriales;D_4__Halomicrobiaceae;D_5__Natronomonas;	0	0	0	0	6	0	0	0	0	0	0	0	0	0	0	0	0	0	0	0
2832e9c8c989e78f59aaa4ac2f5dbdc4	otu1428	D_0__Bacteria	0	0	0	0	7	0	0	0	0	0	0	0	0	0	0	0	0	0	0	0
2836cc5590ffaec2e66fb502c608d9df	otu1429	D_0__Bacteria	0	0	0	11	0	0	0	0	0	0	0	0	0	0	0	0	0	0	0	0
283af84bbd77b7a4fb46486563d05d91	otu1430	D_0__Bacteria	0	0	0	0	0	0	0	0	0	0	0	0	2	0	2	0	0	1	0	0
284fd81e2f1be501dfb08abe84b8e9ff	otu1431	D_0__Bacteria;D_1__Kiritimatiellaeota;D_2__Kiritimatiellae;D_3__WCHB1-41	0	0	0	0	0	14	0	0	0	0	0	0	0	0	0	0	0	0	0	0
28500ae163d3dd8c010ab6ddd369d873	otu1432	D_0__Archaea;D_1__Euryarchaeota;D_2__Halobacteria;D_3__Halobacteriales;D_4__Haloferacaceae;D_5__uncultured;	0	0	0	0	5	0	0	0	0	0	0	0	0	0	0	0	0	0	0	0
28564c62f9f0fb518e667afdd81bfce3	otu1433	D_0__Bacteria	0	0	0	0	0	0	0	0	0	0	0	6	0	0	0	0	0	0	0	0
285c9c976a9a08cfca4150a30485d626	otu1434	D_0__Bacteria;D_1__Fibrobacteres;D_2__Fibrobacteria;D_3__Fibrobacterales;D_4__B122;D_5__uncultured bacterium;D_6__uncultured bacterium	0	5	0	0	0	0	0	0	0	0	0	0	0	0	0	0	0	0	0	0
28618135e814127419f9b3d81395c94e	otu1435	D_0__Archaea;D_1__Hadesarchaeaeota;D_2__candidate divison MSBL1 archaeon SCGC-AAA259D14;D_3__candidate divison MSBL1 archaeon SCGC-AAA259D14;D_4__candidate divison MSBL1 archaeon SCGC-AAA259D14;D_5__candidate divison MSBL1 archaeon SCGC-AAA259D14;D_6__candidate divison MSBL1 archaeon SCGC-AAA259D14	0	0	0	0	0	0	0	0	0	4	14	0	0	11	0	0	14	0	0	0
2863ff5ed4d620f75f6f0b32de2fffbe	otu1436	D_0__Bacteria	0	0	0	0	0	0	0	0	6	0	0	0	0	0	0	0	0	0	0	0
286e6efa18f09e410b8a62567a348ddb	otu1437	D_0__Archaea;D_1__Nanoarchaeaeota;D_2__Woesearchaeia;D_3__uncultured euryarchaeote;D_4__uncultured euryarchaeote;D_5__uncultured euryarchaeote;D_6__uncultured euryarchaeote	8	0	0	0	0	0	0	0	0	0	0	0	0	0	0	0	0	0	0	0
286eae05bed1bdf5218c070c01c4aad7	otu1438	D_0__Bacteria	0	0	0	0	0	0	0	0	0	0	0	5	0	0	0	0	0	0	0	0
287b2b0d05d411ee82e3151b234a6159	otu1439	D_0__Bacteria	0	0	0	0	0	0	0	0	0	0	0	0	0	0	0	13	0	0	0	0
287fdc8a90024a213e9a74d63b905cd5	otu1440	D_0__Bacteria	0	0	0	0	0	0	0	0	0	0	0	0	0	0	0	0	0	0	1	0
2890b8a28f5ac2cb91f8ecddb2276871	otu1441	D_0__Bacteria;D_1__Omnitrophicaeota;D_2__uncultured Omnitrophica bacterium;D_3__uncultured Omnitrophica bacterium;D_4__uncultured Omnitrophica bacterium;D_5__uncultured Omnitrophica bacterium;D_6__uncultured Omnitrophica bacterium	65	15	22	25	0	0	0	7	0	0	0	0	0	0	0	0	0	0	0	0
2896f760731da05779997703fd21224d	otu1442	D_0__Bacteria	0	0	0	0	0	0	0	0	0	0	0	0	0	4	0	0	0	0	0	0
289cb0b3fa8fec6f1d3fdbb7c8324b6b	otu1443	D_0__Bacteria;D_1__Firmicutes;D_2__Clostridia;D_3__Clostridiales;D_4__Family XI	0	0	0	0	0	0	0	0	0	0	7	0	0	0	0	0	0	0	6	0
28a164e190c72201e514fb132f390868	otu1444	D_0__Bacteria	0	0	0	0	0	0	0	0	0	0	0	0	0	0	0	0	0	4	0	0
28a23cbb4cc0a5ebc649470059a3209c	otu1445	D_0__Bacteria;D_1__Planctomycetes;D_2__Phycisphaerae;D_3__Phycisphaerales;D_4__AKAU3564 sediment group;D_5__uncultured organism;D_6__uncultured organism	12	0	17	46	0	0	0	0	0	0	0	0	0	0	0	0	0	0	0	0
28a9e9b44d69cc5c63c80d500588a6eb	otu1446	D_0__Bacteria	0	0	0	0	0	0	0	0	0	0	0	3	0	0	0	0	0	0	0	0
28bad9a06b5c3971ed42d10c4af5bd40	otu1447	D_0__Bacteria;D_1__Omnitrophicaeota;D_2__Candidatus Omnitrophus magneticus;D_3__Candidatus Omnitrophus magneticus;D_4__Candidatus Omnitrophus magneticus;D_5__Candidatus Omnitrophus magneticus;D_6__Candidatus Omnitrophus magneticus	0	4	0	13	0	0	0	0	0	0	0	0	0	0	0	0	0	0	0	0
28bef6b1fd821f145c4fbe86871e27d4	otu1448	D_0__Bacteria;D_1__Cloacimonetes;D_2__Cloacimonadia;D_3__Cloacimonadales;D_4__MSBL8;D_5__uncultured bacterium;D_6__uncultured bacterium	0	0	0	0	0	0	0	0	0	8	0	0	0	0	0	0	0	0	0	0
28c12da3f34820f6181693e4c63df183	otu1449	D_0__Bacteria;D_1__Lentisphaerae;D_2__Oligosphaeria;D_3__Oligosphaerales;D_4__Oligosphaeraceae;D_5__SBZC-1223;D_6__uncultured organism	0	0	0	0	0	0	0	0	0	8	0	0	0	0	8	0	0	0	0	0
28c5df6973cc5487f75079e2b427a130	otu1450	D_0__Archaea;D_1__Altiarchaeota;D_2__Altiarchaeia;D_3__uncultured archaeon;D_4__uncultured archaeon;D_5__uncultured archaeon;D_6__uncultured archaeon	0	0	0	2	0	0	0	0	0	0	0	0	0	0	0	0	0	0	0	0
28edcd37208a44595936050b3ee9ad99	otu1452	D_0__Bacteria	0	1	0	0	0	0	0	0	0	0	0	0	0	0	0	0	0	0	0	0
28f85df333f5b4112ce51e3651036fa6	otu1453	D_0__Bacteria;D_1__Latescibacteria;D_2__uncultured soil bacterium PBS-III-3;D_3__uncultured soil bacterium PBS-III-3;D_4__uncultured soil bacterium PBS-III-3;D_5__uncultured soil bacterium PBS-III-3;D_6__uncultured soil bacterium PBS-III-3	18	43	22	77	0	0	2	0	0	0	0	0	0	0	0	0	0	0	0	0
2916fd5a71c30bc803c5bad409a4a356	otu1454	D_0__Bacteria	0	0	6	0	0	0	0	0	0	0	0	0	0	0	0	0	0	0	0	0
29174d702f052016ae9d59eefa52e9b1	otu1455	D_0__Bacteria	0	0	0	0	0	0	5	0	0	0	0	0	0	0	0	0	0	0	0	0
2918aa39f534864fb4a138005a7ce944	otu1456	D_0__Archaea;D_1__Euryarchaeota;D_2__Halobacteria;D_3__Halobacteriales	0	0	0	0	0	0	0	0	0	0	0	0	0	0	12	0	40	0	0	17
291efeee8384d411311dbf3f72699322	otu1457	D_0__Bacteria;D_1__Lentisphaerae;D_2__Oligosphaeria;D_3__Oligosphaerales;D_4__Oligosphaeraceae;D_5__SBZC-1223;D_6__uncultured bacterium	3	71	44	17	16	0	4	10	0	0	0	0	0	0	0	0	0	0	0	0
292783ee666c54ab1272895a20d3d1aa	otu1458	D_0__Bacteria;D_1__Firmicutes;D_2__Clostridia;D_3__Clostridiales;D_4__Syntrophomonadaceae;D_5__uncultured;	0	2	0	0	0	2	0	0	0	0	0	0	0	0	0	0	0	0	0	0
29333c865dd3f1c9809c2cabcd959cd7	otu1459	D_0__Bacteria	0	0	0	0	0	0	0	0	0	0	0	0	0	0	0	0	0	1	0	0
293489c179300a5c662db61e0bfc6bf8	otu1460	D_0__Archaea;D_1__Nanoarchaeaeota;D_2__Nanohaloarchaeia;D_3__Nanohaloarchaeales;D_4__Nanohaloarchaeaceae	0	0	0	0	0	0	0	0	0	0	0	0	0	0	0	0	0	0	12	0
294088879e72af7a883c02c1a594ccfd	otu1461	D_0__Bacteria	7	0	10	36	0	0	11	0	0	0	0	0	0	0	0	0	0	0	0	0
2940b425196603c0be0b8c493e81955d	otu1462	D_0__Bacteria	0	0	0	0	0	0	0	0	0	0	0	24	0	0	0	0	0	0	0	0
2945584a15ddb6498b200b3c8adba148	otu1463	D_0__Archaea;D_1__Nanoarchaeaeota;D_2__Nanohaloarchaeia	11	4	0	0	0	0	0	0	0	0	0	0	0	0	0	0	0	0	0	0
29468fa242d18504869f7446e1258831	otu1464	D_0__Bacteria	0	0	0	0	5	0	0	0	0	0	0	0	0	0	0	0	0	0	0	0
294d3312040edac2b61f8a78eb589b33	otu1465	D_0__Bacteria	0	0	0	0	0	0	0	0	0	0	0	0	0	0	7	0	0	0	0	0
2971de874b71925ddd40932b22a9a178	otu1466	D_0__Bacteria;D_1__Omnitrophicaeota;D_2__Candidatus Omnitrophus magneticus;D_3__Candidatus Omnitrophus magneticus;D_4__Candidatus Omnitrophus magneticus;D_5__Candidatus Omnitrophus magneticus;D_6__Candidatus Omnitrophus magneticus	33	14	13	0	0	0	0	0	0	0	0	0	0	0	0	0	0	0	0	0
2974ae0fdd88dd7bd54fa4d6c5df3bbb	otu1467	D_0__Bacteria;D_1__Patescibacteria;D_2__Parcubacteria;D_3__Paceibacterales;D_4__Paceibacteraceae;D_5__Candidatus Paceibacter;D_6__uncultured bacterium	0	11	0	11	48	121	130	26	4	15	11	0	0	0	0	75	0	0	0	0
29857d01d95ebda05262af8dd3105ddd	otu1468	D_0__Bacteria	0	0	0	0	0	0	0	0	0	0	0	0	0	4	0	0	0	0	0	0
29a308b344a4aca68f6f8f8691c19b57	otu1469	D_0__Bacteria;D_1__Kiritimatiellaeota;D_2__Kiritimatiellae;D_3__WCHB1-41;D_4__uncultured bacterium;D_5__uncultured bacterium;D_6__uncultured bacterium	14	0	0	0	0	0	0	0	0	0	0	0	0	0	0	0	0	0	0	0
29a985120c0896db7adacd6732099fe7	otu1470	D_0__Bacteria	0	0	0	0	0	0	0	0	0	0	0	0	0	0	0	0	0	0	64	0
29b48a76a7112c70ee499e8215600f46	otu1471	D_0__Archaea;D_1__Euryarchaeota;D_2__Thermoplasmata;D_3__uncultured;D_4__uncultured archaeon;D_5__uncultured archaeon;D_6__uncultured archaeon	0	0	14	0	12	0	0	0	20	0	0	72	152	0	68	0	0	0	0	0
29c9b129b3bd5f5f9d96ab3658147a8d	otu1473	D_0__Bacteria	0	0	4	0	7	0	3	0	0	0	0	2	0	0	0	0	0	0	0	0
29ce49cb645bbe7511c38f61db5d28fd	otu1474	D_0__Bacteria;D_1__Chlamydiae;D_2__LD1-PA32;D_3__metagenome;D_4__metagenome;D_5__metagenome;D_6__metagenome	4507	405	3137	1403	0	5	20	32	14	8	0	5	15	0	0	144	0	0	0	14
29ecbac9e72f770bcb1983cff2a92b11	otu1475	D_0__Bacteria;D_1__Bacteroidetes;D_2__Bacteroidia;D_3__Bacteroidales;D_4__Bacteroidetes BD2-2	0	0	8	0	0	0	0	0	0	0	0	0	0	0	0	0	0	0	0	0
29f0b053d8ccc24ed082d6536b835d14	otu1476	D_0__Bacteria;D_1__Verrucomicrobia;D_2__Verrucomicrobiae;D_3__Verrucomicrobiales;D_4__Akkermansiaceae;D_5__Akkermansia;D_6__uncultured bacterium	0	0	0	0	0	0	0	0	0	0	4	0	0	0	0	0	0	0	0	0
29f188ba232d5e4e4295952c5edb5995	otu1477	D_0__Bacteria	0	0	0	0	2	0	0	0	0	0	0	0	0	0	0	0	0	0	0	0
2a0089dee4bf1be6b3b8ae901d404cde	otu1479	D_0__Bacteria;D_1__Cyanobacteria;D_2__Oxyphotobacteria;D_3__Chloroplast;D_4__Phaseolus acutifolius (tepary bean);D_5__Phaseolus acutifolius (tepary bean);D_6__Phaseolus acutifolius (tepary bean)	0	0	0	0	0	0	0	0	0	0	0	47	0	22	0	39	0	0	0	0
2a05669ab770b46054fc776ff2b5666b	otu1480	D_0__Archaea;D_1__Diapherotrites;D_2__Iainarchaeia;D_3__uncultured archaeon;D_4__uncultured archaeon;D_5__uncultured archaeon;D_6__uncultured archaeon	0	65	22	10	60	23	84	18	64	551	401	3	164	1347	1437	3	7188	2368	3492	4087
2a1289b7e5a0a1b7eba6427610f9eead	otu1481	D_0__Bacteria	0	0	0	0	0	0	0	0	0	0	0	0	0	0	0	0	3	0	0	0
2a1475e807ee26335f87cc7f5b71c5a7	otu1482	D_0__Bacteria	0	21	0	0	19	0	15	14	0	0	0	0	3	11	0	0	0	0	0	0
2a16dd85d15436eda87699c81104f7c6	otu1483	D_0__Archaea;D_1__Nanoarchaeaeota;D_2__Woesearchaeia	0	0	0	0	0	0	0	0	199	33	104	116	19	4	27	0	0	68	50	27
2a1a97aa666736fefd7aab1c5009911b	otu1484	D_0__Archaea;D_1__Euryarchaeota;D_2__Halobacteria;D_3__Halobacteriales;D_4__Haloferacaceae	35	0	10	6	0	0	0	0	0	0	0	0	0	0	0	0	0	0	0	0
2a1bd3543e44ebafdd453ac0c0cdf864	otu1485	D_0__Bacteria	0	0	0	12	0	0	0	0	0	0	0	0	0	0	0	0	0	0	0	0
2a1c6126c45865a249b850212f3ecfb9	otu1486	D_0__Bacteria;D_1__Firmicutes;D_2__Clostridia;D_3__Clostridiales;D_4__Eubacteriaceae	0	0	0	0	0	0	0	0	0	0	0	0	4	0	0	0	0	0	0	0
2a1fe7befd37f22d673ee1532acc877d	otu1487	D_0__Archaea;D_1__Euryarchaeota;D_2__Halobacteria;D_3__Halobacteriales;D_4__Haloferacaceae;D_5__Natronoarchaeum;D_6__uncultured archaeon	0	0	0	0	0	0	0	0	0	0	0	0	0	0	0	0	0	0	0	49
2a21104cbfd8a922ecb51e0f14cbaa56	otu1488	D_0__Bacteria;D_1__Firmicutes;D_2__Clostridia	10	21	33	23	46	7	2	0	16	0	0	0	0	15	0	88	0	0	0	0
2a234b8ca9bd73154cad652b57d40c0e	otu1489	D_0__Bacteria;D_1__Patescibacteria;D_2__Parcubacteria;D_3__uncultured bacterium;D_4__uncultured bacterium;D_5__uncultured bacterium;D_6__uncultured bacterium	0	0	0	0	0	0	0	0	0	3	0	0	0	0	0	0	0	0	0	0
2a54625fb56734fcab877255e590bf8a	otu1490	D_0__Bacteria	0	0	0	0	0	0	0	0	0	0	0	0	0	0	0	0	0	0	104	0
2a596b0d1616f257a9527779c9b17e7d	otu1491	D_0__Archaea;D_1__Euryarchaeota;D_2__Halobacteria;D_3__Halobacteriales	0	0	0	0	0	13	0	0	0	0	0	0	0	0	0	0	0	0	0	0
2a612f431fd359f4fe45644357fc667d	otu1492	D_0__Bacteria	0	11	30	13	0	0	0	0	0	0	0	0	0	0	0	0	0	0	0	0
2a679be4a5485bf741c19289ac9584af	otu1493	D_0__Archaea;D_1__Euryarchaeota;D_2__Halobacteria;D_3__Halobacteriales;D_4__Haloferacaceae	0	0	0	0	0	0	0	0	0	0	0	0	0	0	0	0	6	0	0	0
2a69844006f3888872e1eec7410e7a38	otu1494	D_0__Bacteria;D_1__Firmicutes;D_2__Clostridia;D_3__Clostridiales;D_4__Family XVIII;D_5__Symbiobacterium;D_6__Clostridiales bacterium AND1	2	0	10	0	0	22	0	0	0	0	0	18	0	7	0	13	0	19	8	0
2a7cb096f49c31ecc22d33819073e41b	otu1495	D_0__Bacteria;D_1__Kiritimatiellaeota;D_2__Kiritimatiellae;D_3__WCHB1-41;D_4__uncultured bacterium;D_5__uncultured bacterium;D_6__uncultured bacterium	0	0	0	0	0	0	0	0	0	0	0	0	0	0	0	6	0	0	0	0
2a7e4f1fed5a6ff31030779af4b30abb	otu1496	D_0__Bacteria	0	0	0	0	0	0	0	0	0	0	0	0	4	0	0	0	0	0	0	0
2a81affa8a5f19fbf4ddc510abf45532	otu1497	D_0__Bacteria	0	0	0	0	0	0	0	0	0	0	0	0	0	0	0	0	0	6	0	0
2a9a7dd1ef3bb29fe01a1db6d50abba1	otu1499	D_0__Bacteria;D_1__Patescibacteria;D_2__Parcubacteria;D_3__Candidatus Yanofskybacteria;D_4__uncultured bacterium;D_5__uncultured bacterium;D_6__uncultured bacterium	0	20	0	20	189	16	31	161	0	12	0	0	0	0	0	0	0	0	0	0
2aa58b6a69e028737c7d65806faa0f71	otu1500	D_0__Bacteria	0	0	0	0	0	0	0	0	0	0	0	0	0	0	0	0	0	5	0	0
2aa6b6e498295ff89cc36ea9ac5dbb3f	otu1501	D_0__Bacteria;D_1__Planctomycetes;D_2__Planctomycetacia;D_3__Pirellulales;D_4__Pirellulaceae;D_5__uncultured;D_6__uncultured bacterium	16	108	90	403	37	0	13	0	0	0	0	0	0	0	0	798	0	0	0	0
2aaabbe15f4210f63b74e4120843a2d5	otu1502	D_0__Archaea;D_1__Euryarchaeota;D_2__Halobacteria;D_3__Halobacteriales;D_4__Halomicrobiaceae;D_5__uncultured archaeon;D_6__uncultured archaeon	0	1	0	0	0	0	0	0	0	0	0	0	0	0	0	0	0	0	0	0
2aab3cabb0813914fee740fd2e4b06e9	otu1503	D_0__Bacteria;D_1__Cyanobacteria;D_2__Oxyphotobacteria;D_3__Chloroplast	0	0	0	0	0	0	0	3	0	0	0	0	0	0	0	0	0	0	0	0
2abd59de7804424b6039314e656519c4	otu1504	D_0__Bacteria;D_1__Actinobacteria;D_2__Nitriliruptoria;D_3__Nitriliruptorales;D_4__Nitriliruptoraceae;D_5__uncultured bacterium;D_6__uncultured bacterium	0	0	0	0	0	0	0	0	0	0	0	0	0	21	0	0	0	0	0	0
2ad0c26cc864f7b7af604621cdcbe1cb	otu1505	D_0__Bacteria;D_1__Verrucomicrobia;D_2__Verrucomicrobiae;D_3__Verrucomicrobiales;D_4__Rubritaleaceae;D_5__Haloferula;D_6__uncultured bacterium	0	0	0	11	0	0	0	0	0	0	0	0	0	0	0	0	0	0	0	0
2ae97f7554d07a22660b7e18440a1222	otu1506	D_0__Bacteria;D_1__Patescibacteria;D_2__Parcubacteria	0	0	0	0	0	0	0	0	0	0	0	0	0	0	0	0	0	3	0	0
2af1773ce50fe312f95dd15ac9500ea1	otu1507	D_0__Bacteria;D_1__Firmicutes;D_2__Clostridia;D_3__Clostridiales	0	0	0	0	0	0	0	0	0	0	4	5	0	0	10	0	0	0	0	0
2af43ff6b08b907b79050b7ca3e07709	otu1508	D_0__Bacteria;D_1__Planctomycetes;D_2__Planctomycetacia;D_3__Pirellulales;D_4__Pirellulaceae;D_5__Pir4 lineage;D_6__uncultured organism	0	0	0	0	0	0	0	0	29	0	0	0	0	0	0	49	0	0	0	0
2af7e47a538780d2c91960c717579651	otu1509	D_0__Bacteria	2	0	0	0	0	0	0	0	0	0	0	0	0	0	0	0	0	0	0	0
2afa365afb90d205aabd34d78e734feb	otu1510	D_0__Bacteria;D_1__Proteobacteria;D_2__Alphaproteobacteria	0	0	0	0	0	0	3	0	0	0	0	0	0	0	0	0	0	0	0	0
2b013564373aca788d8d9749622a9f0d	otu1511	D_0__Bacteria	0	0	0	0	0	0	0	0	0	0	0	0	0	0	0	0	0	0	71	0
2b06bb1a90305c6b649228be87ec6945	otu1512	D_0__Archaea;D_1__Euryarchaeota;D_2__Halobacteria;D_3__Halobacteriales;D_4__uncultured;D_5__uncultured haloarchaeon;D_6__uncultured haloarchaeon	0	8	0	0	4	8	0	2	0	0	0	0	13	35	9	0	101	15	68	29
2b1b122ddfc48803b43dea31b55a7a1e	otu1513	D_0__Bacteria;D_1__Patescibacteria;D_2__Saccharimonadia;D_3__Saccharimonadales	4	0	8	7	0	0	0	3	0	0	0	0	0	0	0	0	0	0	0	0
2b238da40aba435b84443fa26b4cafc6	otu1514	D_0__Bacteria;D_1__Planctomycetes;D_2__Planctomycetacia;D_3__Pirellulales;D_4__Pirellulaceae;D_5__Bythopirellula;	0	0	0	0	0	0	0	0	0	0	0	0	0	0	22	0	0	0	0	0
2b3213a8e34210c6b28336d2d9e0ec03	otu1515	D_0__Bacteria;D_1__Patescibacteria;D_2__Parcubacteria;D_3__Candidatus Kaiserbacteria	6	22	30	0	0	29	0	0	0	0	0	0	8	0	0	0	0	0	0	0
2b3707751efce38496c6f07eb8a5b71d	otu1516	D_0__Bacteria	0	0	0	0	0	0	0	0	0	0	0	0	0	0	0	0	0	0	2	0
2b3a34b3c1f000553d06b03a0bb9fc5f	otu1517	D_0__Archaea;D_1__Nanoarchaeaeota;D_2__Nanohaloarchaeia;D_3__Nanohaloarchaeales;D_4__Nanohaloarchaeaceae	0	0	0	3	0	0	0	0	0	0	0	0	0	0	0	0	0	0	0	0
2b510ea537b523347814822bc9e09d6d	otu1518	D_0__Bacteria;D_1__Planctomycetes;D_2__Phycisphaerae;D_3__Phycisphaerales;D_4__AKAU3564 sediment group;D_5__uncultured organism;D_6__uncultured organism	0	0	0	0	0	0	0	0	219	251	87	373	53	181	196	0	70	450	1031	438
2b5414476cd1dc625a16597dcca832dd	otu1519	D_0__Archaea;D_1__Crenarchaeota;D_2__Bathyarchaeia;D_3__uncultured miscellaneous Crenarchaeota group;D_4__uncultured miscellaneous Crenarchaeota group;D_5__uncultured miscellaneous Crenarchaeota group;D_6__uncultured miscellaneous Crenarchaeota group	0	0	0	0	8	0	0	0	0	0	0	0	0	0	0	0	0	0	0	0
2b55c4cb5c2b72956d6adee8db7963e6	otu1520	D_0__Archaea;D_1__Euryarchaeota;D_2__Halobacteria;D_3__Halobacteriales;D_4__Haloferacaceae;D_5__Halorubrum;D_6__Halorubrum tibetense	0	0	0	0	0	0	0	0	0	0	0	36	0	0	0	0	0	20	13	21
2b5989eb8885d319d7f2cf8f1dba443d	otu1521	D_0__Archaea;D_1__Nanoarchaeaeota;D_2__Woesearchaeia	0	0	0	0	0	9	0	0	0	0	0	0	0	0	0	0	0	0	0	0
2b62216adbc7ded4b5ab83f080e12151	otu1522	D_0__Archaea;D_1__Nanoarchaeaeota;D_2__Woesearchaeia	0	0	0	0	0	0	0	0	8	0	0	22	6	14	18	0	0	0	0	0
2b64d8f65d0737bf4bcc708efae0d519	otu1523	D_0__Bacteria;D_1__Proteobacteria;D_2__Alphaproteobacteria;D_3__Rickettsiales;D_4__Anaplasmataceae;D_5__Wolbachia;	0	0	0	0	0	0	0	0	0	0	0	0	0	0	0	0	3	0	0	0
2b74a7f01178626f255ba881be209346	otu1524	D_0__Bacteria;D_1__Firmicutes;D_2__Clostridia;D_3__D8A-2;D_4__uncultured bacterium;D_5__uncultured bacterium;D_6__uncultured bacterium	3	18	0	0	0	0	0	0	0	0	0	0	0	0	0	0	0	0	0	0
2b807c0f2d7bee1dac24d9e37708ced7	otu1525	D_0__Bacteria	0	0	0	0	0	0	0	0	0	0	0	3	0	0	0	0	0	0	0	0
2b834e691c71f79c4b7d6f9ed148be1a	otu1526	D_0__Bacteria;D_1__Spirochaetes;D_2__Spirochaetia;D_3__Spirochaetales;D_4__Spirochaetaceae;D_5__Spirochaeta 2;D_6__uncultured organism	0	0	0	0	5	0	0	0	0	0	0	0	0	0	0	0	0	0	0	0
2b9378054611cb9c4a2fdefc4d30d195	otu1527	D_0__Bacteria	0	0	1	0	0	0	0	0	0	0	0	0	0	0	0	0	0	0	0	0
2b97b09b9fef1bf35c78bf19637ee0d1	otu1528	D_0__Archaea;D_1__Euryarchaeota;D_2__Halobacteria;D_3__Halobacteriales;D_4__Haloferacaceae	0	0	0	35	10	0	0	0	0	0	0	0	0	0	0	0	0	0	0	0
2ba382b6a65a63002be5389bc1598f93	otu1529	D_0__Archaea;D_1__Euryarchaeota;D_2__Halobacteria;D_3__Halobacteriales	0	0	0	0	0	0	0	0	0	0	0	0	0	0	0	0	0	0	6	0
2badadeb3c23da67272dd97bbd415652	otu1530	D_0__Archaea;D_1__Euryarchaeota;D_2__Halobacteria;D_3__Halobacteriales;D_4__Haloferacaceae;D_5__Natronoarchaeum;D_6__uncultured archaeon	0	0	0	0	0	0	0	0	73	50	71	50	87	26	80	21	113	442	257	102
2bb3c8d0f73f829a0738ab4c0de091e1	otu1531	D_0__Bacteria;D_1__Verrucomicrobia;D_2__Verrucomicrobiae;D_3__Verrucomicrobiales;D_4__Rubritaleaceae;D_5__Luteolibacter;	0	17	0	0	0	0	0	0	0	0	0	0	0	0	0	0	0	0	0	0
2bb7f067dc63f7aad441113d81a8700f	otu1532	D_0__Bacteria	0	0	139	0	0	0	0	0	0	0	0	0	0	0	0	0	0	0	0	0
2bb8e1e6880d8674eec3f127a3d23835	otu1533	D_0__Archaea;D_1__Hadesarchaeaeota	0	0	0	0	0	0	0	0	0	0	3	0	0	0	0	0	0	0	0	0
2bbcbad39667e03438b8530f513367d0	otu1534	D_0__Bacteria;D_1__Patescibacteria;D_2__Parcubacteria;D_3__Candidatus Kaiserbacteria;D_4__uncultured organism;D_5__uncultured organism;D_6__uncultured organism	0	0	0	0	0	1	0	0	0	0	0	0	0	0	0	0	0	0	0	0
2bc2c24ef6dca2b2a7dd20e754d8e13d	otu1535	D_0__Bacteria;D_1__Firmicutes;D_2__Clostridia;D_3__Clostridiales;D_4__Ruminococcaceae	0	0	0	5	10	0	3	0	0	0	0	0	0	0	0	0	0	0	0	0
2bc962022dbd9337f5fd56efb0127840	otu1536	D_0__Bacteria	0	0	0	0	0	0	0	0	0	0	0	0	0	0	0	0	0	19	0	0
2bcfe916c0665675b724629ac3c4023f	otu1537	D_0__Bacteria;D_1__Bacteroidetes;D_2__Bacteroidia;D_3__Sphingobacteriales;D_4__CMW-169;D_5__uncultured bacterium;D_6__uncultured bacterium	0	11	0	0	0	0	1	0	0	0	0	0	0	0	0	0	0	0	0	0
2bd164df9e1b18580d57df754aca5ff2	otu1538	D_0__Bacteria	0	0	0	0	0	0	0	0	7	0	0	0	0	0	0	0	0	0	0	0
2bd59c3aae938527142ebaf65e15911f	otu1539	D_0__Archaea;D_1__Euryarchaeota;D_2__Halobacteria;D_3__Halobacteriales	66	122	102	41	19	33	34	12	0	5	0	3	20	8	32	0	6	31	40	36
2be0ebd34e6a522d28d698b304361777	otu1540	D_0__Bacteria	0	0	0	0	0	0	0	0	0	0	0	0	0	0	0	0	3	0	0	0
2be39ea01470c11f149d442607385830	otu1541	D_0__Bacteria	0	0	0	0	0	0	0	0	0	0	0	0	0	0	0	0	0	0	3	0
2be8c8a43875247bdd75bf39bc33aa9f	otu1542	D_0__Bacteria	0	0	0	0	0	0	0	0	0	0	0	0	0	0	0	1	0	0	0	0
2c0026d569f2a24d84e032d52e85edbf	otu1543	D_0__Archaea;D_1__Euryarchaeota;D_2__Halobacteria;D_3__Halobacteriales;D_4__Haloferacaceae;D_5__Salinarchaeum;D_6__uncultured haloarchaeon	0	0	0	0	0	0	14	0	0	0	0	0	0	0	0	0	0	0	0	0
2c0ce44b22ac84d5b1a7516832465cf1	otu1544	D_0__Bacteria;D_1__Planctomycetes;D_2__Planctomycetacia;D_3__Pirellulales;D_4__Pirellulaceae	0	0	0	0	1	7	1	0	0	0	0	0	3	0	0	0	0	0	0	0
2c0d33a8ad27b3ab08c5e01137ea513e	otu1545	D_0__Archaea;D_1__Nanoarchaeaeota;D_2__Woesearchaeia;D_3__uncultured euryarchaeote;D_4__uncultured euryarchaeote;D_5__uncultured euryarchaeote;D_6__uncultured euryarchaeote	0	0	0	0	46	0	0	27	0	0	0	0	0	0	0	31	0	0	0	0
2c0d63c2a62dae197bee67e8c48b729c	otu1546	D_0__Bacteria	0	0	4	0	0	0	0	0	0	0	0	0	0	0	0	0	0	0	0	0
2c107d20cafd7cc82a00855394d58f1c	otu1547	D_0__Bacteria;D_1__Chlamydiae;D_2__LD1-PA32;D_3__metagenome;D_4__metagenome;D_5__metagenome;D_6__metagenome	0	28	0	0	66	107	68	491	0	0	0	0	132	0	24	0	0	0	0	0
2c259979ebc9e05e230816fe4cd96587	otu1548	D_0__Bacteria;D_1__Firmicutes;D_2__Clostridia	134	147	40	280	57	0	31	0	18	0	0	0	0	0	0	604	0	0	0	0
2c2dce9910a3ed8be7904b26abff55bd	otu1549	D_0__Archaea;D_1__Euryarchaeota;D_2__Halobacteria;D_3__Halobacteriales;D_4__Haloferacaceae;D_5__Halovenus;D_6__uncultured haloarchaeon	0	0	0	0	0	10	0	0	0	0	0	0	0	12	0	0	112	0	42	0
2c2f60de9e55e8a023e68948bf909a36	otu1550	D_0__Bacteria;D_1__Patescibacteria;D_2__Parcubacteria	7	0	0	0	0	0	0	0	24	81	37	0	0	0	0	5	0	0	0	0
2c47832f6b10d0d1f4c73754a7d1a60d	otu1552	D_0__Bacteria	0	2	0	0	0	0	0	0	0	0	0	0	0	0	0	0	0	0	0	0
2c4903b374c259aa363e00822356f396	otu1553	D_0__Bacteria;D_1__Firmicutes;D_2__Clostridia;D_3__Thermoanaerobacterales;D_4__Thermoanaerobacteraceae;D_5__Thermoanaerobacter;	0	0	0	3	0	0	0	0	0	0	12	0	7	0	0	0	0	63	26	15
2c508fcea154b5a7eb4a5eb1d7a6c02a	otu1554	D_0__Bacteria	0	0	0	0	0	0	0	0	0	0	0	3	0	0	0	0	0	0	0	0
2c73e2fa359c54ab705095ff0ae5893a	otu1555	D_0__Archaea;D_1__Euryarchaeota;D_2__Halobacteria;D_3__Halobacteriales;D_4__Haloferacaceae;D_5__Halovenus;D_6__uncultured archaeon	0	0	9	0	11	0	0	0	0	0	0	0	0	0	0	0	0	0	0	0
2c7a9cdb019d6c89728d68008a45a53e	otu1557	D_0__Bacteria;D_1__Patescibacteria;D_2__Parcubacteria;D_3__Candidatus Yanofskybacteria;D_4__uncultured bacterium;D_5__uncultured bacterium;D_6__uncultured bacterium	0	0	10	0	0	0	0	0	0	0	0	0	0	0	0	0	0	0	0	0
2c8782178f625b2fd7935b0e6412e389	otu1558	D_0__Bacteria;D_1__Planctomycetes;D_2__Planctomycetacia;D_3__Isosphaerales;D_4__Isosphaeraceae;D_5__uncultured;	0	0	0	0	0	0	0	0	0	5	0	0	0	0	0	0	0	0	0	0
2c8b954fd20f62f9e4c20fd4206cef7a	otu1559	D_0__Bacteria	9	39	10	0	9	0	0	6	0	0	0	0	0	0	0	0	0	0	0	0
2c93a0ce6d8a64e7e43838b9a133b8f3	otu1560	D_0__Bacteria	0	0	0	0	0	0	0	0	0	0	0	0	0	0	0	71	0	0	0	0
2c9e09325f93432c62284cb31cda2db4	otu1561	D_0__Bacteria;D_1__Proteobacteria;D_2__Gammaproteobacteria;D_3__Pseudomonadales;D_4__Pseudomonadaceae;D_5__Pseudomonas;	0	0	2	0	0	0	0	0	0	0	0	0	0	0	0	0	0	0	0	0
2ca888ecd88b1a1c3f5dba48b0dc4508	otu1562	D_0__Bacteria	0	0	0	2	0	0	1	0	0	0	0	0	0	0	0	0	0	0	0	0
2cab83e2c8168737f7ff1af7d75f4371	otu1563	D_0__Bacteria;D_1__Planctomycetes;D_2__Planctomycetacia;D_3__Pirellulales;D_4__Pirellulaceae;D_5__uncultured;D_6__uncultured bacterium	0	0	0	11	0	0	0	0	0	0	0	0	0	0	0	0	0	0	0	0
2cc7bac803f613ab46909270fa6808a0	otu1564	D_0__Bacteria;D_1__Halanaerobiaeota;D_2__Halanaerobiia;D_3__Halanaerobiales;D_4__Halobacteroidaceae;D_5__uncultured;D_6__uncultured low G+C Gram-positive bacterium	0	0	0	0	0	0	5	0	0	0	0	0	0	7	0	5	0	11	0	0
2ccd774d9824bb8a1128571cefc45778	otu1565	D_0__Bacteria	0	0	0	0	0	0	0	0	2	0	0	0	0	0	0	0	0	0	0	0
2ccf798ee9fcf8915fea38f067d809dd	otu1566	D_0__Bacteria	0	0	0	2	0	0	0	0	0	0	0	0	0	0	0	0	0	0	0	0
2ce0fd03284b5d751268e2e2263976d1	otu1567	D_0__Archaea;D_1__Euryarchaeota;D_2__Halobacteria;D_3__Halobacteriales;D_4__Haloadaptaceae;D_5__Haladaptatus;D_6__uncultured archaeon	0	0	0	0	0	21	1	0	0	0	0	0	0	0	0	0	0	0	0	0
2ce50efb3ab6a1c4585ab3dd04301375	otu1568	D_0__Bacteria;D_1__Firmicutes;D_2__Clostridia;D_3__Thermoanaerobacterales;D_4__Thermoanaerobacteraceae;D_5__Thermoanaerobacter;	0	0	0	0	0	0	0	0	0	4	0	0	0	0	0	0	4	0	0	7
2ce8292e69ec56d4eb944e4c15ceafbd	otu1569	D_0__Archaea;D_1__Euryarchaeota;D_2__Halobacteria;D_3__Halobacteriales;D_4__Haloferacaceae;D_5__uncultured;D_6__uncultured haloarchaeon	982	316	423	187	145	41	131	116	22	21	18	13	48	43	51	14	0	40	6	42
2ce8edf2e12f6be1bacc9c711d00d435	otu1570	D_0__Bacteria;D_1__Patescibacteria;D_2__Parcubacteria;D_3__Candidatus Campbellbacteria;D_4__uncultured bacterium;D_5__uncultured bacterium;D_6__uncultured bacterium	0	16	0	0	0	0	0	0	0	0	0	0	0	0	0	0	0	0	0	0
2cecb08c61cb1d51de01ac25749572b9	otu1571	D_0__Archaea;D_1__Euryarchaeota;D_2__Halobacteria;D_3__Halobacteriales;D_4__Haloferacaceae;D_5__uncultured;	0	0	6	0	0	0	0	0	0	0	0	0	0	0	0	0	0	0	0	0
2cf0d79d75f3a5d69c7097f97cd8abdb	otu1572	D_0__Archaea;D_1__Euryarchaeota;D_2__Halobacteria;D_3__Halobacteriales;D_4__Haloferacaceae;D_5__Halohasta;D_6__uncultured archaeon	22	0	5	0	0	9	0	9	11	10	20	0	23	1	23	0	3	23	25	13
2d111d9dc17f7f37c50cb382bd3f3f51	otu1573	D_0__Archaea;D_1__Euryarchaeota;D_2__Halobacteria;D_3__Halobacteriales;D_4__Haloferacaceae;D_5__Halohasta;D_6__uncultured archaeon	0	0	0	0	0	12	0	0	0	0	0	13	0	0	0	0	0	0	0	0
2d141f2a0d5f302e88e08e1949187258	otu1574	D_0__Bacteria	0	0	0	0	0	0	0	0	0	0	0	0	0	2	0	0	0	0	0	0
2d16277f525470df2a0f382410d69dc8	otu1575	D_0__Archaea;D_1__Euryarchaeota;D_2__Halobacteria;D_3__Halobacteriales;D_4__Haloferacaceae;D_5__Halorubrum;D_6__Halorubrum luteum	0	0	0	0	0	0	0	0	17	0	0	0	0	0	40	0	0	24	51	100
2d19eec0a937cb09595f950662e3a601	otu1576	D_0__Bacteria	0	0	0	0	7	0	0	0	0	0	0	0	0	0	0	0	0	0	0	0
2d1d5037ffac2477240b8c37a3253228	otu1577	D_0__Archaea;D_1__Thaumarchaeota;D_2__Nitrososphaeria;D_3__Nitrosopumilales;D_4__Nitrosopumilaceae;D_5__Candidatus Nitrosopumilus;	0	0	0	41	0	290	0	0	11	24	0	0	90	0	20	0	0	0	0	0
2d2b07cc74ef9f6dbae10570dcdbf40f	otu1578	D_0__Bacteria	0	7	0	0	0	0	0	0	0	0	0	0	0	0	0	0	0	0	0	0
2d2d5593b26fe32474c5d4afa76f43f9	otu1579	D_0__Bacteria	0	0	0	0	0	3	0	0	0	0	0	0	0	0	0	0	0	0	0	0
2d30880ee1663161a2cbb4d85bced605	otu1580	D_0__Bacteria	0	0	0	0	0	0	0	0	0	0	0	7	0	0	0	0	0	0	0	0
2d3186f98e8f276f499f1d529c986e22	otu1581	D_0__Bacteria	0	0	0	0	0	0	0	0	1	0	0	0	0	0	0	0	0	0	0	0
2d3c6e3e54261ab9bb97254ea32ecc77	otu1582	D_0__Bacteria	0	0	0	0	0	0	0	0	0	0	0	4	0	0	0	0	0	0	0	0
2d3cf0b00fc671221ac881390f025eed	otu1583	D_0__Bacteria;D_1__Lentisphaerae;D_2__Oligosphaeria;D_3__Oligosphaerales;D_4__Oligosphaeraceae;D_5__uncultured Verrucomicrobia bacterium;D_6__uncultured Verrucomicrobia bacterium	0	0	0	0	0	87	24	0	57	439	758	12	57	22	54	0	0	45	72	13
2d5edfa23d117fed2d3c77433bdcd920	otu1584	D_0__Bacteria;D_1__Proteobacteria;D_2__Alphaproteobacteria;D_3__Rhizobiales;D_4__Beijerinckiaceae;D_5__Chelatococcus;D_6__Chelatococcus sp. ID3	17	0	0	3	8	0	0	3	0	0	0	0	0	0	0	0	0	0	0	9
2d65ba689e91df57059b561a0b47fb40	otu1585	D_0__Bacteria;D_1__Omnitrophicaeota;D_2__Omnitrophia;D_3__Omnitrophales;D_4__Omnitrophaceae;D_5__Candidatus Omnitrophus;D_6__uncultured prokaryote	0	2	0	0	0	0	0	0	0	0	0	0	0	0	0	0	0	0	0	0
2d6cca08d260105849961f92a818ff68	otu1586	D_0__Bacteria;D_1__Firmicutes;D_2__Clostridia	3	0	6	0	9	0	0	0	4	0	0	0	0	0	0	0	0	0	0	0
2d6fcb3b852380f093d7e1d4d6fa6c51	otu1587	D_0__Archaea;D_1__Euryarchaeota;D_2__Halobacteria;D_3__Halobacteriales;D_4__Halomicrobiaceae;D_5__Halomicrobium;D_6__uncultured archaeon	0	0	0	0	0	0	0	0	0	0	0	0	0	0	8	0	0	0	0	0
2d760ebd4f0d54daea1e41edf0851d42	otu1588	D_0__Archaea;D_1__Euryarchaeota;D_2__Halobacteria;D_3__Halobacteriales;D_4__uncultured;D_5__uncultured haloarchaeon;D_6__uncultured haloarchaeon	0	0	0	0	0	14	25	0	0	0	0	0	0	0	0	0	0	0	0	0
2d767ca17c20885f52197e0c91eda27e	otu1589	D_0__Bacteria	0	0	0	0	0	0	0	0	0	0	0	0	0	0	0	2	0	0	0	0
2d7dfeb6bf8d63c45e702d074b25cb2a	otu1590	D_0__Bacteria	0	0	0	0	0	0	0	0	3	0	0	0	0	0	0	0	0	0	0	0
2d835e5db319477a973c4394af7b4816	otu1591	D_0__Bacteria;D_1__Planctomycetes;D_2__Planctomycetacia;D_3__Gemmatales;D_4__Gemmataceae;D_5__uncultured;D_6__uncultured sludge bacterium A12	0	0	0	0	0	0	0	3	0	0	0	0	0	0	0	0	0	0	0	0
2d873d90fea4ad4a8e737f500bf667f6	otu1592	D_0__Bacteria;D_1__Spirochaetes;D_2__V272-189E3;D_3__uncultured organism;D_4__uncultured organism;D_5__uncultured organism;D_6__uncultured organism	0	0	0	0	0	0	0	0	0	3	5	0	0	0	0	0	0	0	0	0
2d87e57ecedd96380003394583500a8f	otu1593	D_0__Bacteria;D_1__Firmicutes;D_2__Clostridia;D_3__Clostridiales;D_4__Syntrophomonadaceae;D_5__uncultured;	0	0	0	0	0	0	0	0	2	0	0	0	0	0	0	0	0	0	0	0
2d8cf8873b84da35a9ab3aabf83e2f19	otu1594	D_0__Archaea;D_1__Euryarchaeota;D_2__Halobacteria;D_3__Halobacteriales;D_4__Haloferacaceae;D_5__Halohasta;	0	0	0	0	0	0	6	0	0	0	0	0	0	0	0	0	0	0	0	0
2d9ae4f6ef60772b5dc0817d808df814	otu1595	D_0__Bacteria	0	0	0	4	0	0	0	0	0	0	0	0	0	0	0	0	0	0	0	0
2d9af426fa1193cbc034edbd4f9ee0b3	otu1596	D_0__Archaea;D_1__Nanoarchaeaeota;D_2__Woesearchaeia	59	85	57	0	0	0	0	50	7	0	0	0	11	10	14	0	0	0	0	0
2d9de2541cdacb5592dc10a81deffec6	otu1597	D_0__Bacteria;D_1__Proteobacteria;D_2__Alphaproteobacteria;D_3__Rhodobacterales;D_4__Rhodobacteraceae;D_5__Paracoccus;	0	0	0	0	0	8	9	0	0	0	0	0	0	0	0	0	0	0	0	0
2db11379ede6c96ad75be0b47c7a250c	otu1598	D_0__Bacteria;D_1__Patescibacteria;D_2__Parcubacteria;D_3__uncultured bacterium;D_4__uncultured bacterium;D_5__uncultured bacterium;D_6__uncultured bacterium	0	0	0	0	0	0	0	0	0	0	0	0	38	54	0	0	0	0	0	0
2dba2e6fb0f09ae9d768408ce770104e	otu1599	D_0__Archaea;D_1__Euryarchaeota;D_2__Halobacteria;D_3__Halobacteriales;D_4__Haloferacaceae;D_5__Halovenus;D_6__soda lake metagenome	0	0	0	0	0	0	0	0	0	0	0	22	0	0	0	0	0	0	0	0
2dc7adac411e99fe80e000a2d04279d8	otu1600	D_0__Bacteria;D_1__Proteobacteria;D_2__Alphaproteobacteria;D_3__Rickettsiales;D_4__Mitochondria	3	0	0	0	0	0	0	0	0	0	0	0	0	0	0	0	0	0	0	0
2dcfd6772a3c07aabf653eece20df9f4	otu1601	D_0__Archaea;D_1__Euryarchaeota;D_2__Halobacteria;D_3__Halobacteriales;D_4__Haloferacaceae;D_5__Halovivax;	289	548	446	58	188	67	178	144	0	53	19	26	134	98	177	26	55	0	106	28
2dd25c18304ed93b560b31e825cca6ac	otu1602	D_0__Bacteria	0	0	0	0	0	0	0	0	0	0	0	0	0	0	0	0	0	0	0	4
2de360424b1208e6bf4c06b0f2a3f0ba	otu1603	D_0__Bacteria;D_1__Proteobacteria;D_2__Deltaproteobacteria;D_3__Desulfobacterales;D_4__Desulfobulbaceae;D_5__Desulfurivibrio;D_6__uncultured bacterium	0	0	0	20	110	46	45	8	12	96	55	175	69	0	61	0	87	0	40	0
2de5297a4e4db7bd8a389d8273bb3c4e	otu1604	D_0__Archaea;D_1__Asgardaeota;D_2__Lokiarchaeia;D_3__uncultured archaeon;D_4__uncultured archaeon;D_5__uncultured archaeon;D_6__uncultured archaeon	0	1	0	0	0	0	0	55	0	1	0	0	3	0	0	7	0	0	0	0
2de5b0a6266d794f42f480e9ad950e6b	otu1605	D_0__Bacteria	0	0	0	1	0	0	0	0	0	0	0	0	0	0	0	0	0	0	0	0
2df51cf1f87856729a6ccd435c5d1765	otu1606	D_0__Bacteria	0	0	0	0	0	0	0	0	3	0	0	0	0	0	0	0	0	0	0	0
2e060262a64aa2c2ab6e71ebd8c85d9e	otu1607	D_0__Bacteria	0	0	0	0	0	0	0	0	0	0	0	9	0	0	0	0	0	0	0	0
2e09b7a99473907aca402042684ce240	otu1608	D_0__Archaea;D_1__Nanoarchaeaeota;D_2__Woesearchaeia;D_3__uncultured euryarchaeote;D_4__uncultured euryarchaeote;D_5__uncultured euryarchaeote;D_6__uncultured euryarchaeote	0	0	0	0	0	0	0	0	0	0	0	0	0	0	0	48	0	0	0	0
2e1f758f4bfff887aaa715c19b232af9	otu1609	D_0__Archaea;D_1__Euryarchaeota;D_2__Halobacteria;D_3__Halobacteriales;D_4__Haloferacaceae;D_5__Natronorubrum;D_6__uncultured archaeon	0	0	0	0	0	0	0	0	0	0	0	25	0	24	0	15	0	0	0	0
2e21ed0a7205ca23b77dd1f92c0623cb	otu1610	D_0__Bacteria	0	0	0	0	3	0	5	0	0	0	0	0	0	0	0	0	0	3	0	0
2e24b0472e5ac341f8fc26677aaba79f	otu1611	D_0__Archaea;D_1__Euryarchaeota;D_2__Halobacteria;D_3__Halobacteriales;D_4__Halomicrobiaceae;D_5__Natronomonas;D_6__uncultured archaeon	0	0	0	0	0	0	0	0	0	0	0	0	0	0	0	0	0	0	27	0
2e2ee4ecc92410f9abd59a5e31a8d2bd	otu1612	D_0__Bacteria	0	6	0	0	0	0	0	0	0	0	0	0	0	0	0	0	0	0	0	0
2e38291360d4ec3efd025a819d0b3b36	otu1613	D_0__Bacteria	0	0	0	0	0	0	0	0	0	0	0	0	0	0	0	0	0	18	5	5
2e3a046cb1da9a52099d85d19e91ccc4	otu1614	D_0__Bacteria	0	0	0	0	0	0	0	0	0	0	0	0	0	0	0	0	0	0	4	0
2e3b4f9e9e081715230bc59a4dd537f3	otu1615	D_0__Archaea;D_1__Euryarchaeota;D_2__Halobacteria;D_3__Halobacteriales;D_4__Haloferacaceae;D_5__Salinarchaeum;D_6__uncultured haloarchaeon	0	0	0	0	0	0	0	0	0	0	0	0	0	9	0	0	0	0	0	0
2e402faf7f475b8efea81b06c6ca107a	otu1616	D_0__Bacteria	0	0	0	0	0	0	0	0	0	0	0	0	0	0	4	0	0	0	0	0
2e4c6bff56cc1c4c949fc1abbc1e02c5	otu1617	D_0__Bacteria	0	0	6	0	0	0	0	0	0	0	0	0	0	0	0	0	0	0	0	0
2e4dbcf523b6331f452c86c50900d32f	otu1618	D_0__Archaea;D_1__Euryarchaeota;D_2__Halobacteria;D_3__Halobacteriales;D_4__uncultured;D_5__uncultured haloarchaeon;D_6__uncultured haloarchaeon	0	0	0	0	0	37	0	0	0	0	0	0	0	0	0	0	0	0	0	0
2e600870d2f455be03eb3ca847af55f2	otu1619	D_0__Bacteria;D_1__Planctomycetes;D_2__Brocadiae;D_3__SM23-32;D_4__uncultured bacterium;D_5__uncultured bacterium;D_6__uncultured bacterium	0	0	0	0	0	0	0	0	0	1	0	0	0	6	0	0	0	0	0	0
2e62fe783fa16b7d32d00de2f72f5d2a	otu1620	D_0__Bacteria	0	0	0	0	0	0	0	0	0	0	0	0	0	4	0	0	0	0	0	0
2e6c9bc14870bb8b392af0656f73a01c	otu1621	D_0__Archaea;D_1__Euryarchaeota;D_2__Halobacteria;D_3__Halobacteriales;D_4__Haloferacaceae;D_5__Natronococcus;	1564	3163	3454	559	944	153	461	978	379	352	185	413	736	509	970	255	117	115	131	204
2e6d65974f5afb3ce312251be7706cf2	otu1622	D_0__Bacteria;D_1__Planctomycetes;D_2__Planctomycetacia;D_3__Isosphaerales;D_4__Isosphaeraceae;D_5__uncultured;	0	0	1	0	0	0	0	0	0	0	0	0	0	0	0	0	0	0	0	0
2e73361734449ad2b11c87b6301c5a33	otu1623	D_0__Bacteria	0	0	0	0	0	0	0	0	0	0	0	0	0	1	0	0	0	0	0	0
2e755649b25ef69311532c52796c5c82	otu1624	D_0__Archaea;D_1__Euryarchaeota;D_2__Halobacteria;D_3__Halobacteriales;D_4__Haloferacaceae;D_5__uncultured;D_6__uncultured haloarchaeon	12	10	0	15	4	4	0	0	0	0	0	0	0	0	0	0	0	0	0	0
2e767f7d3d8c60cbd2d4fb5785251939	otu1625	D_0__Bacteria	1	14	0	5	0	0	0	0	0	0	0	0	0	0	0	0	0	0	0	0
2e7b53a737c9145676c541b046171ed7	otu1626	D_0__Bacteria;D_1__Verrucomicrobia;D_2__Verrucomicrobiae;D_3__Verrucomicrobiales;D_4__Rubritaleaceae;D_5__Luteolibacter;D_6__uncultured bacterium	0	49	34	0	0	0	0	0	0	0	0	0	0	0	0	0	0	0	0	0
2e7bbe58971e288ff156e1ca3452f272	otu1627	D_0__Bacteria;D_1__Planctomycetes;D_2__vadinHA49;D_3__uncultured bacterium;D_4__uncultured bacterium;D_5__uncultured bacterium;D_6__uncultured bacterium	17	24	58	64	2	0	0	1	0	0	0	0	3	0	0	9	0	0	0	0
2e7f421a7ae753d4ec47144727d0e58c	otu1628	D_0__Bacteria;D_1__Cyanobacteria;D_2__Oxyphotobacteria;D_3__Chloroplast	0	0	0	0	0	0	0	0	0	0	0	7	0	0	0	0	0	0	0	0
2e849935e459cad104150a29e19f2796	otu1629	D_0__Archaea;D_1__Euryarchaeota;D_2__Methanomicrobia;D_3__Methanosarcinales;D_4__Methanosarcinaceae;D_5__Methanosalsum;D_6__Methanosalsum natronophilum	0	0	0	8	0	0	0	115	358	31	52	381	237	14	179	33	9	187	89	190
2e8797e14b410eedf7a2fee8e223dff2	otu1630	D_0__Bacteria	8	0	10	0	0	0	0	0	0	0	0	0	0	0	0	0	0	0	0	0
2e8899729c45e9d5734141a61329b017	otu1631	D_0__Archaea;D_1__Euryarchaeota;D_2__Methanomicrobia;D_3__Methanosarcinales;D_4__Methanosarcinaceae;D_5__Methanolobus;	0	0	0	0	0	0	0	0	0	0	0	0	0	0	14	0	0	0	0	0
2e8cdd3044468d95a4d1baeb9b75d7a6	otu1632	D_0__Bacteria;D_1__Kiritimatiellaeota;D_2__Kiritimatiellae;D_3__WCHB1-41	0	18	5	0	0	0	3	0	34	8	0	51	19	0	0	8	0	0	13	0
2e90878ef810883446edf74071ee1a30	otu1633	D_0__Bacteria	0	0	0	0	0	0	0	0	0	0	0	0	3	0	0	0	0	0	0	0
2e96f3caf9efabdae7ab4681a9881fc6	otu1634	D_0__Bacteria	0	0	0	0	0	0	0	0	0	0	0	0	0	2	0	0	0	0	0	0
2ea027e64b731dcd30ae3f22c1539cfc	otu1635	D_0__Archaea;D_1__Euryarchaeota;D_2__Halobacteria;D_3__Halobacteriales;D_4__Haloferacaceae;D_5__uncultured;	0	0	0	0	0	0	0	0	0	0	0	0	0	0	0	0	6	0	0	0
2ea44efb8ffd8bdece1e681ec197ff8d	otu1636	D_0__Bacteria;D_1__Cyanobacteria;D_2__Oxyphotobacteria;D_3__Chloroplast	0	0	0	0	0	0	0	0	0	0	0	0	0	0	0	4	0	0	0	0
2ea6afe1a8c5df802053b282d3a882cd	otu1637	D_0__Bacteria;D_1__Firmicutes;D_2__Clostridia;D_3__Clostridiales	0	0	0	8	0	7	0	0	10	0	0	2	0	50	13	21	0	0	0	0
2eb9d7b22bddf9c68c09a7ad34876f15	otu1638	D_0__Bacteria	0	0	0	0	0	0	0	0	0	0	0	0	0	0	0	0	0	6	0	0
2ec4d2128b31783b2e7283784bb4eb92	otu1639	D_0__Bacteria;D_1__Fusobacteria;D_2__Fusobacteriia;D_3__Fusobacteriales;D_4__Fusobacteriaceae;D_5__Cetobacterium;D_6__uncultured bacterium	0	0	0	0	12	9	0	0	0	0	0	0	8	21	5	14	0	11	0	0
2ece834dd1e982ba6e3927c1ac3bd182	otu1640	D_0__Bacteria	0	0	3	0	0	0	0	0	0	0	0	0	0	0	0	0	0	0	0	0
2eeee3ce94627628794fba0bb683845e	otu1641	D_0__Archaea;D_1__Nanoarchaeaeota;D_2__Woesearchaeia	0	0	0	0	0	3	0	0	0	0	0	0	0	0	0	0	0	0	0	0
2efbe5db483f6d14fe0486adc7d38ffd	otu1642	D_0__Archaea;D_1__Euryarchaeota;D_2__Methanomicrobia;D_3__uncultured;D_4__archaeon;D_5__archaeon;D_6__archaeon	0	0	0	6	0	5	0	0	28	252	244	17	39	136	86	0	155	65	82	60
2f14d10e4f7b5026c294f5d49a93cc11	otu1643	D_0__Bacteria;D_1__Verrucomicrobia;D_2__Verrucomicrobiae;D_3__Chthoniobacterales;D_4__Chthoniobacteraceae;D_5__Chthoniobacter;D_6__uncultured bacterium	0	0	4	0	0	0	0	0	0	0	0	0	0	0	0	0	0	0	0	0
2f16f0ac55bec39f9b7439e5319a065c	otu1644	D_0__Bacteria	0	0	0	0	0	0	0	2	0	0	0	0	0	0	0	0	0	0	0	0
2f1a5a38362cca693cdf8e84902ef1a0	otu1645	D_0__Archaea;D_1__Thaumarchaeota;D_2__Nitrososphaeria;D_3__Nitrososphaerales;D_4__Nitrososphaeraceae	0	0	0	0	0	0	0	0	0	0	0	0	6	0	0	0	10	0	0	0
2f1b1690ba5c949cd8249a6afc1c4f54	otu1646	D_0__Bacteria	0	15	0	0	0	0	0	0	0	0	0	25	0	5	3	0	0	0	0	0
2f29c1597794af64c5e776bc519eb959	otu1647	D_0__Bacteria;D_1__Patescibacteria;D_2__Parcubacteria;D_3__uncultured bacterium;D_4__uncultured bacterium;D_5__uncultured bacterium;D_6__uncultured bacterium	0	0	19	0	0	0	0	0	0	0	0	0	0	0	0	0	0	0	0	0
2f2c6705cd7ed61b5e8dbc50fb35f6fc	otu1648	D_0__Archaea;D_1__Nanoarchaeaeota;D_2__Nanohaloarchaeia;D_3__Nanohaloarchaeales;D_4__Nanohaloarchaeaceae;D_5__uncultured haloarchaeon;D_6__uncultured haloarchaeon	0	0	2	0	0	0	0	0	0	0	0	0	0	1	0	0	27	22	27	6
2f3a90fb9a42c4c0fdbd320e836f89ce	otu1649	D_0__Bacteria;D_1__Planctomycetes;D_2__Planctomycetacia;D_3__Pirellulales;D_4__Pirellulaceae;D_5__Rhodopirellula;	0	21	0	0	0	0	0	0	0	0	16	0	0	0	0	0	0	0	0	0
2f46685b886a7d820c88f2cce9a72e2a	otu1650	D_0__Bacteria	0	2	0	0	0	0	8	3	0	0	0	0	0	0	0	0	0	0	0	0
2f56919c72aaccce6c8f32c5bb9f4866	otu1651	D_0__Archaea;D_1__Euryarchaeota;D_2__Halobacteria;D_3__Halobacteriales;D_4__Haloferacaceae;D_5__uncultured;D_6__uncultured haloarchaeon	61	20	17	0	0	8	11	14	0	0	0	0	25	13	19	0	0	0	0	0
2f63f3d2c47b061e3f7e2fb0dfdb6ce9	otu1652	D_0__Bacteria;D_1__Planctomycetes;D_2__Planctomycetacia;D_3__Pirellulales;D_4__Pirellulaceae	0	0	0	0	0	0	5	0	0	0	0	0	0	0	0	0	0	0	0	0
2f7ea969109bff8c6a6ccd664a10f147	otu1654	D_0__Bacteria;D_1__Planctomycetes;D_2__Planctomycetacia;D_3__Planctomycetales;D_4__Rubinisphaeraceae;D_5__Planctomicrobium;D_6__uncultured bacterium	0	0	0	0	0	0	6	0	0	0	7	0	0	3	0	0	0	0	0	0
2f8469e06b3db813b7fa62511a35c06a	otu1655	D_0__Bacteria;D_1__Planctomycetes;D_2__Planctomycetacia;D_3__Pirellulales;D_4__Pirellulaceae;D_5__Rhodopirellula;D_6__uncultured bacterium	0	0	0	0	0	5	0	0	0	0	0	0	0	0	0	0	0	0	0	0
2f877f57c7fa2795bdfc23533246cbfd	otu1656	D_0__Bacteria;D_1__Cloacimonetes;D_2__Cloacimonadia;D_3__Cloacimonadales;D_4__MSBL8;D_5__uncultured bacterium;D_6__uncultured bacterium	127	483	377	736	27	0	14	6	0	0	0	0	0	0	0	236	0	0	0	0
2f92464d645f66f304d7883218f3ad33	otu1657	D_0__Bacteria	10	0	0	0	0	0	0	0	0	0	0	0	0	0	0	0	0	0	0	0
2f9467a0db47520dc678cab57e3a3c04	otu1658	D_0__Archaea;D_1__Euryarchaeota;D_2__Halobacteria;D_3__Halobacteriales;D_4__uncultured	0	0	0	4	0	0	4	0	0	0	0	0	0	0	0	0	0	0	0	0
2f965ce11f02483dd9c6ac0e32200dbe	otu1659	D_0__Bacteria	0	0	1	0	0	0	0	0	0	0	0	0	0	0	0	0	0	0	0	0
2fa2c92db9044d4ae3903f13dc893f6c	otu1660	D_0__Archaea;D_1__Nanoarchaeaeota;D_2__Woesearchaeia	0	0	0	0	0	0	0	0	32	0	0	0	0	59	0	0	0	0	0	0
2fa2fdde90e59cc45ef131ceddd66413	otu1661	D_0__Archaea;D_1__Euryarchaeota;D_2__Halobacteria;D_3__Halobacteriales;D_4__Haloferacaceae;D_5__Halovenus;D_6__uncultured archaeon	0	0	0	0	4	0	0	0	0	0	0	0	0	0	11	0	0	0	0	0
2fab9a5ac63deffe360788d8bed5d007	otu1662	D_0__Bacteria	0	0	0	0	0	0	0	0	4	0	0	0	0	0	0	0	0	0	0	0
2faeebc6732a2aa8cdbf37604601f3f1	otu1663	D_0__Bacteria	0	0	0	0	0	0	0	0	0	0	0	0	0	2	0	0	0	0	0	0
2fb59f49f69cc44fa1012dd2d1649c1f	otu1664	D_0__Bacteria	0	0	0	0	0	0	0	0	0	0	0	10	0	0	0	0	0	0	0	0
2fcd52448a20a3ab09895aa902365b7a	otu1665	D_0__Bacteria;D_1__Gemmatimonadetes;D_2__BD2-11 terrestrial group;D_3__uncultured bacterium;D_4__uncultured bacterium;D_5__uncultured bacterium;D_6__uncultured bacterium	0	0	0	0	8	0	0	0	0	0	0	0	0	0	0	0	0	0	0	0
2fce55cc9df8e58efaefc38186792b51	otu1666	D_0__Bacteria;D_1__Verrucomicrobia;D_2__Verrucomicrobiae;D_3__Chthoniobacterales;D_4__Terrimicrobiaceae;D_5__Terrimicrobium;D_6__uncultured bacterium	0	11	0	0	0	0	0	0	0	0	0	0	0	0	0	0	0	0	0	0
2fd074e42af88d25dd809d3336644ecb	otu1667	D_0__Bacteria;D_1__Spirochaetes;D_2__Spirochaetia;D_3__Spirochaetales;D_4__Spirochaetaceae;D_5__Spirochaeta 2;	0	0	0	0	0	0	0	0	0	0	0	0	0	1	0	0	0	0	0	0
2fdfba02b9fa33ebc2255120d9858939	otu1668	D_0__Bacteria;D_1__Patescibacteria	0	0	0	0	0	2	0	0	0	0	0	0	0	0	0	0	0	0	0	0
2fe171fb95453b70360142865a16a9f4	otu1669	D_0__Bacteria	0	0	0	0	0	0	0	3	0	0	0	0	0	0	0	0	0	0	0	0
2feb103d0fb55b3585ae9c1fb85028e8	otu1670	D_0__Archaea;D_1__Euryarchaeota;D_2__Halobacteria;D_3__Halobacteriales;D_4__Haloferacaceae;D_5__uncultured;	0	0	0	0	0	0	0	0	0	0	0	0	0	0	0	0	0	0	8	0
2ff38247cadc64dddd41ba88973017c6	otu1672	D_0__Archaea;D_1__Euryarchaeota;D_2__Halobacteria;D_3__Halobacteriales;D_4__Halomicrobiaceae;D_5__Natronomonas;	5	8	0	10	6	0	35	18	0	3	0	6	1	0	21	0	0	46	13	16
2ff39bf4e270cec75ca482aef22065ee	otu1673	D_0__Bacteria;D_1__Patescibacteria;D_2__Parcubacteria;D_3__uncultured bacterium;D_4__uncultured bacterium;D_5__uncultured bacterium;D_6__uncultured bacterium	0	3	14	0	0	0	0	10	0	0	0	0	0	0	0	0	0	0	0	0
2ff438ed72c5c1734ab1f8b68bd95088	otu1674	D_0__Archaea;D_1__Euryarchaeota;D_2__Halobacteria;D_3__Halobacteriales;D_4__Haloferacaceae;D_5__Natrialba;	753	247	312	12	0	0	0	0	0	0	0	0	0	0	0	0	0	0	0	0
2ff9ecb5440068c3d0d236e8353e4bbe	otu1675	D_0__Bacteria	2	0	0	0	0	0	0	0	0	0	0	0	0	0	0	0	0	0	0	0
2ffea5fc58225abf3ffb58f8d886c4b2	otu1676	D_0__Archaea;D_1__Euryarchaeota;D_2__Thermoplasmata;D_3__uncultured;D_4__uncultured archeon 'KTK 4A';D_5__uncultured archeon 'KTK 4A';D_6__uncultured archeon 'KTK 4A'	0	0	0	0	14	0	0	0	7	0	0	0	39	45	73	0	73	287	164	262
2ffef1daa2d5358af78514dc18d7a5c4	otu1677	D_0__Bacteria	0	0	0	0	0	0	0	0	0	0	0	2	0	0	0	0	0	0	0	0
300286ab932d9be0a1e1a6dcde62c93d	otu1678	D_0__Archaea;D_1__Euryarchaeota;D_2__Halobacteria;D_3__Halobacteriales;D_4__Haloferacaceae	7	0	0	0	0	22	0	0	15	15	8	0	12	31	0	49	19	6	0	0
300339d8acbdc7751a7df74519e97786	otu1679	D_0__Bacteria;D_1__Patescibacteria;D_2__Parcubacteria	0	0	0	0	0	0	0	0	14	6	1	6	3	0	0	0	0	0	0	0
3005d0cd1c07f6dd34ddf444bd838c0d	otu1680	D_0__Bacteria;D_1__Actinobacteria;D_2__Actinobacteria;D_3__Micromonosporales;D_4__Micromonosporaceae;D_5__Longispora;D_6__uncultured bacterium	0	0	0	0	3	0	0	0	0	0	0	0	0	0	0	0	0	0	0	0
301129879cb51a493ecaa5342cb0015e	otu1681	D_0__Bacteria;D_1__Patescibacteria;D_2__ABY1;D_3__Candidatus Falkowbacteria	0	5	7	0	0	0	0	0	0	0	0	0	0	0	0	0	0	0	0	0
3012810924bd861efa5f64680371763d	otu1682	D_0__Bacteria;D_1__Actinobacteria;D_2__Nitriliruptoria;D_3__Nitriliruptorales;D_4__Nitriliruptoraceae;D_5__Nitriliruptor;	28	69	59	0	57	15	0	44	0	0	0	0	0	117	52	0	0	39	70	20
3013b73b1912de4ee0fc6fd919b3b0c1	otu1683	D_0__Bacteria;D_1__Patescibacteria;D_2__Parcubacteria	10	0	0	0	156	5	79	0	0	0	0	1	0	0	0	949	0	0	0	0
301bcc8a7768bac389e7906f223f12c3	otu1684	D_0__Bacteria	0	0	0	0	0	0	0	0	0	0	0	0	2	0	0	0	0	0	0	0
302d4d9b443d2f4408b77d981cf3009d	otu1685	D_0__Bacteria	0	0	0	0	0	0	0	0	14	62	82	8	18	16	37	0	32	13	53	29
303d79abdbb13379d9bc34cc4f297296	otu1686	D_0__Bacteria	0	0	0	0	0	0	0	0	2	0	0	0	0	0	0	0	0	0	0	0
3050607785f8eae2467fb7704568c2da	otu1687	D_0__Bacteria;D_1__Kiritimatiellaeota;D_2__Kiritimatiellae;D_3__WCHB1-41;D_4__uncultured bacterium;D_5__uncultured bacterium;D_6__uncultured bacterium	0	0	0	0	0	0	0	0	0	0	0	0	0	16	19	0	0	0	0	0
3052d3409a5c31f03aa34d4355e54a34	otu1688	D_0__Bacteria;D_1__Omnitrophicaeota;D_2__uncultured Omnitrophica bacterium;D_3__uncultured Omnitrophica bacterium;D_4__uncultured Omnitrophica bacterium;D_5__uncultured Omnitrophica bacterium;D_6__uncultured Omnitrophica bacterium	0	1	0	0	0	0	0	0	0	9	0	0	11	0	0	0	0	0	0	0
3053cbef9932582791fa6aeb534e5319	otu1689	D_0__Bacteria;D_1__Planctomycetes;D_2__Planctomycetacia;D_3__Pirellulales;D_4__Pirellulaceae;D_5__Pir4 lineage;D_6__uncultured organism	0	0	0	0	0	0	0	0	0	0	0	0	0	0	0	0	0	1	0	0
305510be56f20307b4def9f9f73a4c60	otu1690	D_0__Archaea;D_1__Nanoarchaeaeota;D_2__Woesearchaeia;D_3__unidentified archaeon;D_4__unidentified archaeon;D_5__unidentified archaeon;D_6__unidentified archaeon	0	0	0	0	0	0	0	0	0	33	0	0	0	0	0	0	0	0	0	0
3055743ac11bbae9b1ae3794f08ec056	otu1691	D_0__Bacteria;D_1__Actinobacteria;D_2__Nitriliruptoria;D_3__Nitriliruptorales;D_4__Nitriliruptoraceae;D_5__uncultured bacterium;D_6__uncultured bacterium	0	0	0	0	11	0	0	0	0	0	0	0	0	0	0	0	0	0	0	0
30558ff2a6dcc74f75213fe354a1d634	otu1692	D_0__Bacteria	0	0	0	0	15	0	0	0	0	0	0	0	0	0	0	0	0	0	0	0
305aabb4264eebb73d6b83259d51b889	otu1693	D_0__Archaea;D_1__Nanoarchaeaeota;D_2__Nanohaloarchaeia;D_3__Nanohaloarchaeales;D_4__Nanohaloarchaeaceae	0	0	0	0	0	9	0	0	11	0	0	9	0	0	0	0	0	0	0	0
305fbfc08929152a751a3275a1bddf3c	otu1694	D_0__Bacteria	0	0	0	0	0	0	0	0	0	0	0	9	0	0	0	0	0	0	0	0
3069244071e47b8c3cbe6d8ff279a820	otu1695	D_0__Bacteria;D_1__Firmicutes;D_2__Clostridia;D_3__Clostridiales	0	9	0	0	0	0	0	0	0	0	27	0	0	0	0	34	0	0	0	0
3069900e0c2b5ca6e8e152168382754f	otu1696	D_0__Bacteria	0	0	0	0	0	0	6	0	0	1	1	0	0	0	0	0	0	0	0	0
306aee3e9da88ab472905099d3837819	otu1697	D_0__Archaea;D_1__Euryarchaeota;D_2__Thermoplasmata;D_3__uncultured;D_4__uncultured archaeon;D_5__uncultured archaeon;D_6__uncultured archaeon	0	19	0	5	11	0	0	0	0	0	0	0	0	0	0	0	0	0	0	0
306c4603b0906d41027e1cfafc11e2ac	otu1698	D_0__Bacteria;D_1__Firmicutes;D_2__Bacilli;D_3__Lactobacillales;D_4__Carnobacteriaceae;D_5__Alkalibacterium;D_6__Alkalibacterium putridalgicola	0	0	1	0	0	0	0	0	0	0	0	0	0	0	0	0	0	0	0	0
30720c23f9d5dacf8fef8024640d64c5	otu1699	D_0__Bacteria;D_1__Firmicutes;D_2__Clostridia	0	0	0	0	0	1	0	0	0	0	0	0	0	0	0	0	0	0	0	0
30811518a87de62d23d6aeb9e643ffa2	otu1701	D_0__Bacteria;D_1__Proteobacteria;D_2__Gammaproteobacteria;D_3__Oceanospirillales;D_4__Halomonadaceae;D_5__Halomonas;D_6__Halomonas sp.	0	0	0	0	11	0	5	0	0	0	0	0	0	0	0	0	0	0	0	0
3083b60a407e2a4bf9a4ecb71a5ab1db	otu1702	D_0__Bacteria	0	0	0	0	0	0	0	0	0	0	0	0	0	8	0	0	0	0	0	0
308954c401e82953a239c510711d5501	otu1703	D_0__Bacteria	0	0	0	0	0	0	0	0	0	0	0	4	0	0	0	0	0	0	0	0
30944ab62dd05d27cccbcab679d9af3e	otu1704	D_0__Bacteria;D_1__Firmicutes;D_2__Clostridia;D_3__D8A-2;D_4__uncultured bacterium;D_5__uncultured bacterium;D_6__uncultured bacterium	0	0	0	0	0	32	0	21	0	0	0	23	35	7	14	0	0	0	0	0
30948c6c7df468647dfbaded363e1d9e	otu1705	D_0__Bacteria	0	0	0	0	0	0	0	0	0	0	0	0	0	0	2	0	0	0	0	0
309d806fed96a66617146ea1a26be45b	otu1706	D_0__Bacteria;D_1__Spirochaetes;D_2__Spirochaetia;D_3__Spirochaetales;D_4__Spirochaetaceae	0	0	0	0	0	0	0	0	1	0	0	0	0	0	0	0	0	0	0	0
30a9ae7fadd4ca619b81cff4f6683f37	otu1707	D_0__Bacteria;D_1__Lentisphaerae;D_2__Oligosphaeria;D_3__Oligosphaerales;D_4__Oligosphaeraceae;D_5__uncultured Verrucomicrobia bacterium;D_6__uncultured Verrucomicrobia bacterium	0	0	12	0	0	30	0	40	64	0	0	128	61	0	50	0	0	0	0	0
30b0465234f36a7b3f5804b313b55049	otu1708	D_0__Archaea;D_1__Euryarchaeota;D_2__Halobacteria;D_3__Halobacteriales;D_4__Haloferacaceae;D_5__Halovenus;D_6__Halovenus aranensis	0	0	0	13	0	18	0	0	0	8	24	17	0	22	10	0	27	417	137	254
30b0ea7b10d8574bd650f9c5bc74582d	otu1709	D_0__Archaea;D_1__Euryarchaeota;D_2__Halobacteria;D_3__Halobacteriales;D_4__Haloferacaceae;D_5__Halorubrum;	0	0	0	0	0	0	0	0	0	0	0	0	32	0	0	0	0	0	10	53
30d50792d949a2f92591d1ae44d502e7	otu1710	D_0__Bacteria;D_1__Chlamydiae;D_2__LD1-PA32;D_3__metagenome;D_4__metagenome;D_5__metagenome;D_6__metagenome	12	8	34	58	0	0	0	0	0	0	0	0	0	0	0	0	0	0	0	0
30dcc17e41b2226a59e2c8a9ab7922e9	otu1711	D_0__Bacteria	0	0	0	0	1	0	0	0	0	0	0	0	0	0	0	0	0	0	0	0
30df8895f8c94325e61e49ed6741a35f	otu1712	D_0__Bacteria;D_1__Firmicutes	0	0	0	0	9	0	6	0	8	0	0	0	0	0	0	20	0	0	0	0
30efd1c192721ac22e51855ef8fd0a4a	otu1713	D_0__Bacteria;D_1__Gemmatimonadetes;D_2__BD2-11 terrestrial group;D_3__uncultured bacterium;D_4__uncultured bacterium;D_5__uncultured bacterium;D_6__uncultured bacterium	0	0	3	0	0	0	0	0	0	0	0	0	0	0	0	0	0	0	0	5
30f38f7d912bd8a0d2aaa870e0cfea77	otu1714	D_0__Bacteria;D_1__Firmicutes;D_2__Clostridia	0	0	0	0	0	0	0	0	0	0	0	0	0	0	4	0	0	0	0	0
30f626ffcf514c6cab03cbc38ba332c0	otu1715	D_0__Bacteria	0	0	0	0	0	0	0	0	0	0	0	0	0	0	3	0	0	0	0	0
30fa53d5df37179ae05f277e361ed93c	otu1716	D_0__Bacteria;D_1__Cloacimonetes;D_2__Cloacimonadia;D_3__Cloacimonadales;D_4__MSBL8;D_5__uncultured bacterium;D_6__uncultured bacterium	121	27	46	0	518	1295	664	326	168	477	443	357	861	39	232	32	0	0	0	0
30fcf02602fc45fd8813d23c96807236	otu1717	D_0__Bacteria;D_1__Kiritimatiellaeota;D_2__Kiritimatiellae;D_3__WCHB1-41	0	0	0	0	0	0	0	0	7	0	0	0	0	0	0	0	0	0	0	0
31043a57d6a71dd725324c9aead7c4a0	otu1719	D_0__Bacteria	0	0	0	0	0	0	0	26	0	0	0	0	0	0	0	0	0	0	0	0
3119bb99a83238a00473d5f40beef1a0	otu1720	D_0__Bacteria;D_1__Verrucomicrobia;D_2__Verrucomicrobiae;D_3__Pedosphaerales;D_4__Pedosphaeraceae;D_5__ADurb.Bin63-1;D_6__uncultured bacterium	0	2	0	0	0	0	0	0	0	0	0	0	0	0	0	0	0	0	0	0
311ae0b9ca469711d29fcdd25d00647e	otu1721	D_0__Bacteria	0	0	0	0	0	0	0	0	0	0	0	0	0	0	0	0	20	0	0	0
3121f56f85bb16db89660404bad585fa	otu1722	D_0__Bacteria	0	0	0	0	0	0	0	0	0	0	0	1	0	0	0	0	0	0	0	0
31258d16bfa29c05eb84a2e10a9ac570	otu1723	D_0__Bacteria;D_1__Patescibacteria;D_2__Parcubacteria;D_3__Candidatus Yanofskybacteria;D_4__uncultured bacterium;D_5__uncultured bacterium;D_6__uncultured bacterium	0	0	3	0	2	0	0	0	0	0	0	0	0	0	0	0	0	0	0	0
3134958108148b613022ff376f803ef7	otu1724	D_0__Archaea;D_1__Euryarchaeota;D_2__Halobacteria;D_3__Halobacteriales;D_4__Haloferacaceae;D_5__uncultured;	268	41	40	69	0	105	32	23	20	8	0	23	15	3	0	0	23	76	52	125
313511269023939088ac15f5f2ba0589	otu1725	D_0__Bacteria	0	0	0	0	0	0	0	0	0	0	0	3	0	0	0	0	0	0	0	0
314134ccf89b7161ac52d82f5b5f276d	otu1726	D_0__Archaea;D_1__Euryarchaeota;D_2__Thermoplasmata;D_3__uncultured;D_4__uncultured archaeon;D_5__uncultured archaeon;D_6__uncultured archaeon	0	9	0	0	0	0	0	0	0	0	0	0	0	0	0	0	0	0	0	0
31557ee08818856ed7616ae8d4a3b91a	otu1727	D_0__Archaea;D_1__Euryarchaeota;D_2__Halobacteria;D_3__Halobacteriales;D_4__Haloferacaceae;D_5__Halovenus;D_6__uncultured haloarchaeon	30	0	0	13	0	0	14	39	0	0	0	0	0	0	0	0	22	0	19	0
3155875e4cef51215f0178a0fb7a0126	otu1728	D_0__Bacteria	0	0	0	0	0	0	0	0	0	0	1	0	0	0	0	0	0	0	0	0
3156b8b2433ec6ec7f145b83907d3d27	otu1729	D_0__Bacteria	0	0	0	0	0	0	0	0	0	0	4	0	0	0	0	0	0	0	0	0
315fe9c331b4befd04ffd5a8a7695104	otu1730	D_0__Bacteria;D_1__Patescibacteria;D_2__Parcubacteria	0	0	0	0	0	3	1	49	4	0	0	0	0	0	0	0	0	0	0	0
3174644fc694db2d6d5e030198ef0493	otu1731	D_0__Archaea;D_1__Euryarchaeota;D_2__Halobacteria;D_3__Halobacteriales;D_4__Haloferacaceae;D_5__Halovenus;	13	0	0	0	0	0	0	0	0	0	0	0	0	0	0	0	0	0	0	0
3176645a13fbdf5f1c554d742271a4b8	otu1732	D_0__Bacteria	0	0	2	0	0	0	0	0	0	0	0	0	0	0	0	0	0	0	0	0
3183641d036bbc8cc559629d11d2f02c	otu1733	D_0__Archaea;D_1__Euryarchaeota;D_2__Halobacteria;D_3__Halobacteriales;D_4__Haloferacaceae;D_5__Halovenus;D_6__uncultured haloarchaeon	0	0	0	0	0	0	26	0	0	0	0	0	0	0	0	0	0	0	0	0
3192eb8ee7fee76fe1bd1446cd52b832	otu1734	D_0__Archaea;D_1__Nanoarchaeaeota;D_2__Woesearchaeia	0	0	0	0	0	0	0	5	0	0	0	0	0	0	0	0	0	0	0	0
31987e5f465a11b1d49055294c7e595b	otu1736	D_0__Bacteria;D_1__Bacteroidetes;D_2__Bacteroidia;D_3__Bacteroidales;D_4__ML635J-4 aquatic group;D_5__anaerobic digester metagenome;D_6__anaerobic digester metagenome	0	0	0	0	0	0	0	0	0	0	0	1	0	0	0	0	0	0	0	0
31b5bc4c32ac53931dd9fced0aa55276	otu1737	D_0__Bacteria	26	9	7	20	0	0	0	7	0	0	0	0	0	0	0	0	0	0	0	0
31c2a728ba4d5e8788e51ef37d3add65	otu1738	D_0__Bacteria	0	0	0	0	0	0	2	0	0	0	0	0	0	0	0	0	0	0	0	0
31c6e8fe08f85c7f8f298d3400126cb7	otu1740	D_0__Bacteria;D_1__Verrucomicrobia;D_2__Verrucomicrobiae;D_3__Chthoniobacterales;D_4__Chthoniobacteraceae;D_5__Chthoniobacter;D_6__uncultured Verrucomicrobia bacterium	0	0	0	0	0	0	0	0	0	0	5	0	0	0	0	0	0	0	0	0
31d26791815a90f5e917195d090d6373	otu1741	D_0__Bacteria;D_1__Planctomycetes;D_2__Planctomycetacia;D_3__Pirellulales;D_4__Pirellulaceae;D_5__uncultured;D_6__uncultured Planctomycetaceae bacterium	0	0	0	0	0	0	0	0	0	0	9	0	0	0	0	0	0	0	0	0
31d69e588957cc59da26dde0825838dc	otu1742	D_0__Bacteria;D_1__Acidobacteria;D_2__Thermoanaerobaculia;D_3__Thermoanaerobaculales;D_4__Thermoanaerobaculaceae;D_5__Thermoanaerobaculum;D_6__uncultured bacterium	0	5	13	13	0	0	0	0	0	0	0	0	0	0	0	0	0	0	0	0
31d6c0b1a50aa121609926bc7e7063b6	otu1743	D_0__Archaea;D_1__Euryarchaeota;D_2__Halobacteria;D_3__Halobacteriales;D_4__uncultured;D_5__uncultured haloarchaeon;D_6__uncultured haloarchaeon	0	20	57	19	0	0	0	7	0	0	0	0	0	0	0	0	0	0	0	0
31db6cdaa3a93e22610df82c13b5fdbe	otu1744	D_0__Bacteria	0	0	0	0	0	0	0	0	1	0	0	0	0	0	0	0	0	0	0	0
31de0eb1b303f15e362e19d6b4df60e9	otu1745	D_0__Archaea;D_1__Euryarchaeota;D_2__Halobacteria;D_3__Halobacteriales;D_4__Haloferacaceae;D_5__Natronococcus;D_6__uncultured Natronococcus sp.	201	121	123	32	0	0	0	45	12	0	0	20	0	0	0	0	0	0	0	0
31e4602e83ac72a3876b24b865aa22f9	otu1746	D_0__Bacteria	0	0	0	0	0	0	4	0	0	0	0	0	0	0	0	0	0	0	0	0
31edb87f8ff7d38b27abdd37bd8cfc56	otu1747	D_0__Archaea;D_1__Euryarchaeota;D_2__Halobacteria;D_3__Halobacteriales	0	0	0	0	0	0	0	0	0	0	0	0	10	6	21	0	2	0	0	0
31efbf44c8df19a32bc5828343cc797f	otu1748	D_0__Bacteria;D_1__Patescibacteria;D_2__Parcubacteria;D_3__Candidatus Yanofskybacteria;D_4__uncultured bacterium;D_5__uncultured bacterium;D_6__uncultured bacterium	0	0	0	0	7	0	12	11	0	0	0	0	0	0	0	0	0	0	0	0
31f234eea91f1ec98bf7adacce348b2a	otu1749	D_0__Bacteria;D_1__Actinobacteria;D_2__Nitriliruptoria;D_3__Nitriliruptorales;D_4__Nitriliruptoraceae	0	0	0	0	0	0	11	0	0	0	0	0	0	0	0	0	0	0	0	0
31f3e038b7c61b865564299ecdc4f4c6	otu1750	D_0__Bacteria	0	0	0	0	0	0	0	0	0	0	0	4	0	0	0	0	0	0	0	0
31f8973a7cefe63942fe0ccaedec9315	otu1751	D_0__Bacteria;D_1__Chloroflexi;D_2__N9D;D_3__uncultured bacterium;D_4__uncultured bacterium;D_5__uncultured bacterium;D_6__uncultured bacterium	0	0	0	0	0	0	2	0	0	0	0	0	0	0	0	0	0	0	0	0
31f906b11c67e06f878659c849ae2403	otu1752	D_0__Bacteria	0	0	21	0	0	8	0	0	0	0	0	0	0	0	0	0	0	0	0	0
31fa437256f29d5e810545afe7ad4d08	otu1753	D_0__Bacteria;D_1__Planctomycetes;D_2__Planctomycetacia;D_3__Isosphaerales;D_4__Isosphaeraceae;D_5__uncultured;D_6__uncultured bacterium	0	0	0	0	0	0	0	0	0	5	0	0	0	0	0	0	0	0	0	0
31fa991b705867059569878a1d4b9db9	otu1754	D_0__Bacteria;D_1__Planctomycetes;D_2__Planctomycetacia;D_3__Planctomycetales;D_4__Rubinisphaeraceae;D_5__Planctomicrobium;D_6__uncultured bacterium	0	0	0	0	0	0	0	0	0	0	0	0	2	0	0	0	0	0	0	0
3201dd322621bad518e80f70b3986110	otu1755	D_0__Archaea;D_1__Nanoarchaeaeota;D_2__Woesearchaeia	0	11	2	5	0	0	0	0	0	0	0	0	0	0	4	0	0	0	0	0
320edaf7308e66d95c7e171ed3706a0d	otu1756	D_0__Bacteria;D_1__Bacteroidetes;D_2__Rhodothermia;D_3__Balneolales;D_4__Balneolaceae;D_5__uncultured;D_6__Gracilimonas sp. HME9599	0	0	0	0	0	0	0	0	0	0	0	0	0	0	5	0	0	0	0	0
32164742b15d527dbf6ad0f610b62f71	otu1757	D_0__Archaea;D_1__Euryarchaeota;D_2__Halobacteria;D_3__Halobacteriales;D_4__Haloferacaceae	0	0	0	0	0	0	0	0	26	92	55	68	18	20	20	14	0	146	40	58
32248a508ed4185ef5fa7b129062d793	otu1758	D_0__Bacteria;D_1__Omnitrophicaeota;D_2__uncultured Omnitrophica bacterium;D_3__uncultured Omnitrophica bacterium;D_4__uncultured Omnitrophica bacterium;D_5__uncultured Omnitrophica bacterium;D_6__uncultured Omnitrophica bacterium	46	213	63	37	0	165	118	201	0	338	329	0	0	0	0	0	0	0	0	0
3229605fa99ca0b3e48a4dfa622afec5	otu1759	D_0__Bacteria;D_1__Kiritimatiellaeota;D_2__Kiritimatiellae;D_3__WCHB1-41;D_4__uncultured bacterium;D_5__uncultured bacterium;D_6__uncultured bacterium	0	0	0	0	0	0	6	0	0	0	0	0	0	0	0	0	0	0	0	0
322cfe100baec24a25c0f6db177fd799	otu1760	D_0__Bacteria	0	1	0	0	0	0	0	0	0	0	0	0	0	0	0	0	0	0	0	0
324b666267257d707c2803bee0b3f1db	otu1761	D_0__Bacteria	0	0	1	0	0	0	0	0	0	0	0	0	0	0	0	0	0	0	0	0
326359e1dfea45cac23b66758d9e0ead	otu1762	D_0__Bacteria	0	0	0	0	0	0	0	0	0	0	0	0	0	1	0	0	0	0	0	0
32683268a1e65e79d859ea9e32f15849	otu1763	D_0__Bacteria;D_1__Patescibacteria;D_2__Parcubacteria;D_3__uncultured bacterium;D_4__uncultured bacterium;D_5__uncultured bacterium;D_6__uncultured bacterium	0	0	0	0	0	0	0	257	0	0	0	0	0	0	0	0	0	0	0	0
326c8d4a1185070305f7aaec5a70baa6	otu1764	D_0__Bacteria	0	0	0	0	0	0	0	0	0	0	0	0	0	0	0	0	0	8	0	0
326d7d24ce22a09319f0fc111e74fb28	otu1765	D_0__Bacteria	0	0	0	0	0	0	0	0	0	0	0	0	0	0	2	0	0	0	0	0
3270f287edae584dc5a47a970f718e73	otu1766	D_0__Bacteria	0	0	0	0	0	0	0	0	0	0	0	0	0	0	0	3	0	0	0	0
327569704ba3cc55fc41dd3e55709cf1	otu1767	D_0__Archaea;D_1__Thaumarchaeota;D_2__Nitrososphaeria;D_3__Nitrosopumilales;D_4__Nitrosopumilaceae	0	0	0	0	0	0	0	0	0	0	0	0	0	0	14	0	0	0	0	0
327957744a21aae47240758eba536bcb	otu1768	D_0__Archaea;D_1__Nanoarchaeaeota;D_2__Woesearchaeia	0	0	0	0	0	0	0	0	0	0	9	0	0	0	0	0	0	0	0	0
327d4e2eeadb8add9818c82c99f2829f	otu1769	D_0__Bacteria;D_1__Proteobacteria;D_2__Deltaproteobacteria;D_3__Desulfovibrionales	2	0	0	2	0	0	0	0	0	0	0	0	0	0	0	0	0	0	0	0
327fa20c573491c548c09aeac74abe97	otu1770	D_0__Archaea;D_1__Nanoarchaeaeota;D_2__Woesearchaeia;D_3__uncultured euryarchaeote;D_4__uncultured euryarchaeote;D_5__uncultured euryarchaeote;D_6__uncultured euryarchaeote	0	0	5	0	0	0	0	0	0	0	0	0	0	0	0	0	0	0	0	0
328010c1510cf18c1bcf03184b47ead5	otu1771	D_0__Bacteria;D_1__Planctomycetes;D_2__ODP123;D_3__uncultured organism;D_4__uncultured organism;D_5__uncultured organism;D_6__uncultured organism	0	0	0	0	0	0	0	0	0	0	0	0	0	0	0	27	0	0	0	0
3291d9ea5bed993c95d023b8e36bd861	otu1773	D_0__Archaea;D_1__Euryarchaeota;D_2__Halobacteria;D_3__Halobacteriales;D_4__Haloferacaceae	0	0	0	0	0	0	0	0	0	0	0	0	0	0	0	0	0	5	0	0
3298e73341a1d1e8403a8a845816fcdf	otu1774	D_0__Archaea;D_1__Nanoarchaeaeota;D_2__Woesearchaeia	0	0	0	0	0	0	0	0	0	5	13	72	2	0	0	0	0	0	0	0
329f76f9758f2a99de29c588f543b59f	otu1775	D_0__Bacteria	0	0	1	0	0	0	0	0	0	0	0	0	0	0	0	0	0	0	0	0
32a36578d13c7e0f28997d9747087f86	otu1776	D_0__Bacteria	12	0	0	0	0	0	0	0	0	0	0	0	0	0	0	0	0	0	0	0
32ab0d6637078db28d950c83f884609c	otu1777	D_0__Bacteria	0	0	0	0	0	0	0	0	0	0	0	0	1	0	0	0	0	0	0	0
32c458251aae0c20cede16ba50136aff	otu1778	D_0__Archaea;D_1__Euryarchaeota;D_2__Halobacteria;D_3__Halobacteriales;D_4__Halomicrobiaceae;D_5__uncultured archaeon;D_6__uncultured archaeon	0	0	0	0	0	0	32	0	0	0	0	0	18	0	0	0	0	0	2	0
32cdc9a7fa49ea381c5752d66731b91b	otu1780	D_0__Bacteria;D_1__Omnitrophicaeota;D_2__uncultured bacterium;D_3__uncultured bacterium;D_4__uncultured bacterium;D_5__uncultured bacterium;D_6__uncultured bacterium	0	12	0	0	0	0	0	0	0	0	0	0	0	0	0	0	0	0	0	0
32cf3273d4afd226ea4c1ed85e2f0550	otu1781	D_0__Bacteria	0	0	0	0	0	0	0	0	0	0	0	38	0	0	0	0	0	0	0	0
32d7b3f2ffe650a2512b2b2dbf19dd54	otu1782	D_0__Archaea;D_1__Euryarchaeota;D_2__Thermoplasmata;D_3__uncultured;D_4__uncultured archaeon;D_5__uncultured archaeon;D_6__uncultured archaeon	29	17	0	2	329	7236	3542	643	251	131	116	2769	2589	377	1252	61	31	42	40	67
32d81fbcfae880faf45aee8f728a3306	otu1783	D_0__Bacteria;D_1__Patescibacteria;D_2__Parcubacteria;D_3__uncultured bacterium;D_4__uncultured bacterium;D_5__uncultured bacterium;D_6__uncultured bacterium	0	0	0	0	0	0	0	0	104	14	72	92	76	115	123	0	20	0	0	0
32dbf4a30651215045106b226882afa1	otu1784	D_0__Bacteria;D_1__Planctomycetes;D_2__Planctomycetacia;D_3__Pirellulales;D_4__Pirellulaceae	0	0	0	0	15	0	0	0	0	0	0	0	0	0	0	0	0	0	0	0
32e0865120c18926a1edb22a8933609a	otu1786	D_0__Bacteria;D_1__WS1;D_2__uncultured organism;D_3__uncultured organism;D_4__uncultured organism;D_5__uncultured organism;D_6__uncultured organism	0	0	0	5	0	0	0	0	0	0	0	0	0	0	0	0	0	0	0	0
32e2efb6b9dc445b3774a2723029b240	otu1787	D_0__Bacteria	0	0	0	3	0	0	0	0	0	0	0	0	0	0	0	0	0	0	0	0
32e3aef5a11927a03e161b8109b241a0	otu1788	D_0__Bacteria;D_1__Patescibacteria;D_2__Parcubacteria;D_3__uncultured bacterium;D_4__uncultured bacterium;D_5__uncultured bacterium;D_6__uncultured bacterium	0	0	0	0	0	0	0	0	0	0	2	0	0	0	0	0	0	0	0	0
32e443b10f64fdc8a120a3396465a412	otu1789	D_0__Bacteria;D_1__Planctomycetes;D_2__Planctomycetacia;D_3__Isosphaerales;D_4__Isosphaeraceae;D_5__uncultured;D_6__uncultured bacterium	0	0	0	0	0	0	7	0	0	0	0	0	0	0	0	0	0	0	0	0
32e47d53eb1a38aa47ce4c1fe8570d9d	otu1790	D_0__Archaea;D_1__Euryarchaeota;D_2__Halobacteria;D_3__Halobacteriales;D_4__Haloferacaceae;D_5__uncultured;D_6__uncultured haloarchaeon	0	0	0	0	0	0	0	13	0	0	0	0	0	0	0	0	0	0	0	0
32e5806f7d03c4c502fdd1617a0c42dd	otu1791	D_0__Bacteria	0	0	0	0	0	0	7	0	0	0	0	0	0	0	0	0	0	0	0	0
32e8b92c221416c6e85cca9c5595d450	otu1792	D_0__Bacteria;D_1__Patescibacteria	0	0	2	0	5	200	89	10	0	0	0	0	0	0	0	0	0	0	0	0
32f1f7e603861c1da7e1c2de794d2e7d	otu1793	D_0__Archaea;D_1__Nanoarchaeaeota;D_2__Woesearchaeia;D_3__uncultured euryarchaeote;D_4__uncultured euryarchaeote;D_5__uncultured euryarchaeote;D_6__uncultured euryarchaeote	0	0	0	0	0	0	5	0	0	0	0	0	0	0	0	17	0	0	0	0
32fa2f33c1e9c89c972256caeba7db95	otu1795	D_0__Bacteria;D_1__Actinobacteria;D_2__Rubrobacteria;D_3__Rubrobacterales;D_4__Rubrobacteriaceae;D_5__Rubrobacter;	0	0	0	0	0	0	1	0	0	0	0	0	0	0	0	0	0	0	0	0
32fdd74f62fb076e582f8f0dbfede0b8	otu1796	D_0__Bacteria;D_1__Hydrogenedentes;D_2__Hydrogenedentia;D_3__Hydrogenedentiales;D_4__Hydrogenedensaceae;D_5__uncultured bacterium;D_6__uncultured bacterium	0	0	0	0	0	4	0	0	0	0	0	0	0	0	0	0	0	0	0	0
33080ba42622d322a9e9de0a5bd11bf3	otu1798	D_0__Bacteria	0	0	0	0	0	2	0	0	0	0	0	0	0	0	0	0	0	0	0	0
330a50c771e223dcda12432642d56d6a	otu1799	D_0__Bacteria	0	0	0	0	0	0	16	0	0	109	0	1	0	0	0	0	0	0	0	0
331217ff0373be4a512b2163cbef4f97	otu1800	D_0__Bacteria;D_1__Firmicutes;D_2__Clostridia;D_3__Clostridiales;D_4__Family XVIII;D_5__Symbiobacterium;D_6__Clostridiales bacterium AND1	0	0	0	0	0	0	0	0	2	0	0	0	0	0	3	0	0	0	0	0
331a4f82371380323b916ef18da83c9a	otu1801	D_0__Bacteria	0	0	0	0	0	0	0	0	0	0	0	0	0	0	0	3	0	0	0	0
331bf489bacee71f7121d088b4defd43	otu1802	D_0__Bacteria	0	0	0	0	0	0	0	0	0	0	0	0	0	0	0	35	0	0	0	0
33332101269eeb3feb43b87d7d435897	otu1803	D_0__Bacteria;D_1__Firmicutes;D_2__Clostridia;D_3__Clostridiales;D_4__Syntrophomonadaceae;D_5__uncultured;D_6__uncultured low G+C Gram-positive bacterium	0	0	16	0	0	0	0	0	0	0	0	0	0	0	0	0	0	0	0	0
3338d6b777699468009d61b01c7f26b7	otu1804	D_0__Bacteria;D_1__Firmicutes;D_2__Clostridia;D_3__Clostridiales;D_4__Family XVIII;D_5__Symbiobacterium;D_6__Clostridiales bacterium AND1	6	0	0	0	0	0	0	0	0	0	0	0	0	0	0	0	0	0	0	0
335a436ec9ea286e561c24b1346aae61	otu1805	D_0__Bacteria;D_1__Omnitrophicaeota;D_2__Candidatus Omnitrophus magneticus;D_3__Candidatus Omnitrophus magneticus;D_4__Candidatus Omnitrophus magneticus;D_5__Candidatus Omnitrophus magneticus;D_6__Candidatus Omnitrophus magneticus	33	0	0	20	0	4	0	69	0	65	30	0	2	0	0	0	0	0	0	0
336278012226178cd6d2189814c9b811	otu1806	D_0__Bacteria	0	0	0	0	5	0	0	0	0	0	0	0	0	0	0	0	0	0	0	0
33683365f455fa433ceeb9272ce489c7	otu1807	D_0__Bacteria	0	0	0	0	0	0	0	0	0	0	0	0	0	0	0	2	0	0	0	0
336faaccc5874f6c9b8bc2bbfe3b7acc	otu1808	D_0__Bacteria	0	0	0	0	0	0	0	0	0	0	0	0	0	3	0	0	0	0	0	0
33715d05c79512b929b12ade95079a58	otu1809	D_0__Bacteria	0	0	0	0	0	0	0	0	0	0	0	0	0	7	0	0	0	0	0	0
3373d98da369cc6df7a81c3415918516	otu1810	D_0__Bacteria;D_1__Firmicutes;D_2__Clostridia;D_3__Clostridiales;D_4__Syntrophomonadaceae;D_5__uncultured;D_6__uncultured low G+C Gram-positive bacterium	0	8	22	0	0	0	0	0	0	0	0	0	0	0	0	0	0	0	0	0
337a6684802138fcb61650bc56510e96	otu1811	D_0__Bacteria;D_1__Bacteroidetes;D_2__Bacteroidia;D_3__Cytophagales;D_4__Cyclobacteriaceae	0	0	0	0	0	5	0	0	0	0	0	0	0	0	0	0	0	0	0	0
33998a432291ff165abe5c946ee0f281	otu1812	D_0__Bacteria	0	0	0	0	0	0	0	0	0	0	0	0	0	0	0	4	0	0	0	0
339bb1a99b77d3829e0ad9d4958947ed	otu1813	D_0__Archaea;D_1__Euryarchaeota;D_2__Halobacteria;D_3__Halobacteriales;D_4__Haloferacaceae;D_5__Natronoarchaeum;D_6__uncultured archaeon	0	8	13	0	5	16	9	0	167	178	325	241	226	190	221	167	430	1166	1022	396
33a1a11d671064594dc3fd1b3a6183cc	otu1814	D_0__Bacteria	0	0	0	0	0	0	0	0	0	0	0	0	0	0	8	0	0	0	0	0
33a24f7590b14bba26db54cea5ec8b35	otu1815	D_0__Archaea;D_1__Euryarchaeota;D_2__Halobacteria;D_3__Halobacteriales;D_4__Haloferacaceae;D_5__Halovenus;D_6__uncultured haloarchaeon	22	13	0	0	0	0	0	0	0	19	0	19	0	0	0	0	32	28	45	14
33afa585a7b123b9f83cccbd556efcdb	otu1816	D_0__Archaea;D_1__Euryarchaeota;D_2__Methanomicrobia;D_3__Methanosarcinales;D_4__Methanosaetaceae;D_5__Methanosaeta;	0	0	0	0	0	0	0	0	0	0	0	311	0	0	0	0	0	0	0	0
33b15a7825f0763b6cbf3461fc4da928	otu1817	D_0__Bacteria	0	0	0	0	0	0	1	0	0	0	0	0	0	0	0	0	0	0	0	0
33bba085fd4f51153ced7289824f02b0	otu1818	D_0__Bacteria	0	0	0	0	0	0	0	0	0	0	0	0	0	6	0	0	0	0	0	0
33cb6515d2d7138e34780f20993c8ada	otu1819	D_0__Bacteria;D_1__Patescibacteria;D_2__Parcubacteria;D_3__uncultured bacterium;D_4__uncultured bacterium;D_5__uncultured bacterium;D_6__uncultured bacterium	14	12	0	10	12	341	98	21	1725	765	846	523	638	466	747	71	78	421	272	323
33dbba23a6f4a3f2cc27176a93fc7540	otu1820	D_0__Bacteria;D_1__Patescibacteria;D_2__Parcubacteria	0	0	0	0	0	0	0	0	8	0	0	0	0	0	0	0	0	0	0	0
33e53408647b1da256f4fcf80b1f6db0	otu1821	D_0__Bacteria	0	0	0	0	0	0	0	0	2	0	0	0	0	0	0	0	0	0	0	0
33fa8740d678b7cd41257907279db718	otu1823	D_0__Bacteria	0	0	0	0	0	0	0	0	0	0	6	0	0	0	0	0	0	0	0	0
340bc15aadfdeda92d38ecb5ef9e14f2	otu1824	D_0__Bacteria	0	0	0	0	0	0	0	0	0	0	0	0	0	0	0	0	0	0	2	0
3427222d478d0596e6534e036331795a	otu1825	D_0__Bacteria	0	0	0	0	0	0	0	2	0	0	0	0	0	0	0	0	0	0	0	0
342aaec84a203506bbf49ec4b0f9d0e8	otu1826	D_0__Bacteria;D_1__Patescibacteria;D_2__Parcubacteria;D_3__Candidatus Kaiserbacteria;D_4__uncultured organism;D_5__uncultured organism;D_6__uncultured organism	0	0	0	0	0	0	0	0	24	0	0	0	0	0	0	0	0	0	0	0
342cf38faeaae99e6c8e26905552ff80	otu1827	D_0__Bacteria;D_1__Planctomycetes;D_2__Planctomycetacia;D_3__Isosphaerales;D_4__Isosphaeraceae;D_5__uncultured;D_6__uncultured Isosphaera sp.	0	0	0	0	0	0	0	0	0	0	8	0	0	0	0	0	0	0	0	0
3434a34fbfb920626ccf8f11ea1dfe51	otu1829	D_0__Bacteria;D_1__Chlamydiae;D_2__Chlamydiae;D_3__Chlamydiales;D_4__Simkaniaceae;D_5__uncultured;	0	0	0	0	0	0	0	0	0	0	0	0	0	0	0	6	0	0	0	0
344120bc5c69a9ccf45f9d1e169fa098	otu1831	D_0__Archaea;D_1__Euryarchaeota;D_2__Halobacteria;D_3__Halobacteriales;D_4__Haloferacaceae;D_5__uncultured;D_6__uncultured haloarchaeon	13	12	0	0	0	0	0	0	0	0	0	0	0	0	0	0	0	0	0	0
34622d850c024fca94fdb69c46c0e8ec	otu1832	D_0__Bacteria;D_1__Planctomycetes;D_2__Brocadiae;D_3__SM23-32;D_4__uncultured bacterium;D_5__uncultured bacterium;D_6__uncultured bacterium	0	0	0	0	0	0	0	0	0	0	0	0	0	0	0	0	0	1	0	0
3478f2bab76cee59ca2014f2176d480f	otu1833	D_0__Bacteria;D_1__Proteobacteria;D_2__Deltaproteobacteria;D_3__Bradymonadales;D_4__Bradymonadaceae;D_5__uncultured proteobacterium;D_6__uncultured proteobacterium	0	0	9	0	0	0	0	0	0	0	0	0	0	0	0	0	0	0	0	0
34846be74d9eadbf8492686dbdde76bf	otu1834	D_0__Bacteria	0	0	0	0	0	0	0	0	0	0	0	0	0	0	0	0	0	0	0	81
348cfc5c34f9364f71bfb5c16092fa88	otu1835	D_0__Bacteria	0	0	0	0	9	0	0	0	0	0	0	0	0	0	0	0	0	0	0	0
34916ea9243a600d9afb8ff785897b12	otu1836	D_0__Bacteria;D_1__Proteobacteria;D_2__Gammaproteobacteria;D_3__Cellvibrionales	0	3	0	0	0	0	0	0	0	0	0	0	0	0	0	0	0	0	0	0
349317d1afc23660c84e37981ca11044	otu1837	D_0__Bacteria	0	0	0	0	0	0	0	0	0	0	0	0	0	0	0	0	0	10	0	0
349794874c57e66684c9cdc58681ba87	otu1838	D_0__Bacteria;D_1__Lentisphaerae;D_2__Lentisphaeria;D_3__Victivallales;D_4__SBZC-4624;D_5__uncultured organism;D_6__uncultured organism	0	0	0	0	6	0	15	0	0	0	0	0	0	0	0	17	0	0	0	0
34a32f947e6a87fdd6ceb98a6409680a	otu1839	D_0__Bacteria;D_1__Firmicutes	13	0	0	0	0	0	0	0	0	0	0	6	0	0	0	6	0	0	0	0
34aa69e61749b10153da83d5a435752b	otu1840	D_0__Archaea;D_1__Euryarchaeota;D_2__Halobacteria;D_3__Halobacteriales;D_4__uncultured;D_5__uncultured haloarchaeon;D_6__uncultured haloarchaeon	0	0	0	0	0	0	2	0	0	0	0	0	0	0	0	0	0	0	0	0
34b395885677830c9d80ca0742e7ad6d	otu1841	D_0__Archaea;D_1__Euryarchaeota;D_2__Halobacteria;D_3__Halobacteriales;D_4__Haloferacaceae;D_5__Salinarchaeum;D_6__uncultured haloarchaeon	0	0	0	0	8	14	0	0	0	0	0	0	0	0	0	0	0	0	0	0
34bb2634da616dcde562b1ec57c19d18	otu1842	D_0__Bacteria;D_1__Lentisphaerae;D_2__Oligosphaeria;D_3__Oligosphaerales	0	6	0	4	7	0	7	0	49	124	40	27	17	3	51	0	24	290	145	411
34bcd1f9622a9c3b6d834520e0a69088	otu1843	D_0__Archaea;D_1__Euryarchaeota;D_2__Halobacteria;D_3__Halobacteriales;D_4__Haloferacaceae;D_5__uncultured;D_6__uncultured haloarchaeon	0	2	0	0	0	0	0	0	0	0	0	0	0	0	0	0	0	0	0	0
34bf4d625393f2160ffbd90db0221ce1	otu1844	D_0__Bacteria;D_1__Proteobacteria;D_2__Gammaproteobacteria;D_3__Gammaproteobacteria Incertae Sedis;D_4__Unknown Family;D_5__uncultured;D_6__uncultured bacterium	7	0	0	0	0	0	0	0	0	0	0	0	0	0	0	0	0	0	0	0
34cb8f668e78afb51a5ab33f7b6bef2f	otu1845	D_0__Bacteria;D_1__Firmicutes;D_2__Bacilli;D_3__Bacillales;D_4__Bacillaceae;D_5__uncultured Bacillus sp.;D_6__uncultured Bacillus sp.	0	0	0	0	0	0	0	0	0	0	0	15	0	0	0	0	0	0	0	0
34dd82cd95a2990d55461debbee856c7	otu1846	D_0__Bacteria;D_1__Planctomycetes;D_2__Planctomycetacia;D_3__Pirellulales;D_4__Pirellulaceae;D_5__Rhodopirellula;D_6__Pirellula sp.	0	2	3	0	0	0	0	0	0	0	0	0	0	0	0	0	0	0	0	0
34e70b5611831f1696e9baf4179523f8	otu1847	D_0__Bacteria	0	0	0	0	0	2	0	0	0	0	0	0	0	0	0	0	0	0	0	0
34e85b68fb9db3e5909183f570845bfc	otu1848	D_0__Bacteria;D_1__Chloroflexi;D_2__Gitt-GS-136	0	0	0	0	0	0	0	0	0	0	3	0	0	0	0	0	0	0	0	0
34eb2df760fe2905d018b34a8f4ce320	otu1849	D_0__Bacteria;D_1__Firmicutes;D_2__Clostridia	0	0	0	0	0	0	0	0	0	0	0	7	0	0	0	0	0	0	0	0
34ed8b506eac47e11ec5e98de87cdd59	otu1850	D_0__Bacteria	0	3	0	0	0	0	0	0	0	0	0	0	0	0	0	0	0	0	0	0
34fa734a1262186ca9f5b3f93ea65df1	otu1851	D_0__Bacteria	0	0	0	0	0	0	0	0	1	0	0	0	0	0	0	0	0	0	0	0
351031ab8684b00aecb2ff825a932519	otu1853	D_0__Archaea;D_1__Euryarchaeota;D_2__Halobacteria;D_3__Halobacteriales;D_4__Halomicrobiaceae;D_5__Natronomonas;	0	0	0	0	14	0	0	0	0	0	0	0	0	0	0	0	0	0	0	0
35110b2789f45a3baf1db365aaef22bb	otu1854	D_0__Bacteria	0	0	0	8	0	0	0	0	0	0	0	0	0	0	0	0	0	0	0	0
3514d8ddbafb517db8595eb454da5da1	otu1855	D_0__Archaea;D_1__Euryarchaeota;D_2__Halobacteria;D_3__Halobacteriales;D_4__Haloferacaceae;D_5__Salinarchaeum;D_6__uncultured haloarchaeon	0	0	0	0	0	0	0	0	0	0	0	0	0	0	0	0	0	0	4	0
351814be559e8b85d051f4744f94ec09	otu1856	D_0__Bacteria	0	0	0	0	0	0	0	0	0	0	0	0	0	0	0	7	0	0	0	0
35195fe2413e3f6c437d5cca230670ba	otu1857	D_0__Archaea;D_1__Euryarchaeota;D_2__Halobacteria;D_3__Halobacteriales;D_4__Haloferacaceae;D_5__uncultured;	0	0	0	0	8	0	0	0	0	0	0	0	0	0	0	0	0	0	0	0
35232569a58280cfc1414f30b144540e	otu1858	D_0__Bacteria	0	0	0	0	0	0	0	0	0	0	0	0	0	0	0	0	0	0	0	3
352866b8a97ee2a87d60cdc53ee083af	otu1859	D_0__Bacteria	0	0	0	0	0	0	16	0	0	0	0	0	0	0	0	0	0	0	0	0
3533746ef62a13fc0bc2e4bff0a5a36b	otu1860	D_0__Bacteria	0	0	0	4	0	0	0	0	0	0	0	0	0	0	0	0	0	0	0	0
353434a60bb530e5ea5055991fe4fde6	otu1861	D_0__Bacteria	0	0	6	0	0	0	2	0	0	0	0	0	1	0	0	0	0	0	0	0
3536b1f5e94048e5cc42c5f1ab3974e3	otu1862	D_0__Bacteria	0	0	0	0	0	0	0	0	0	0	3	0	0	0	0	0	0	0	0	0
354b3b065fd24a3f1e8110766dabfc7b	otu1863	D_0__Bacteria	0	0	0	0	2	0	0	0	0	0	0	0	0	0	0	0	0	0	0	0
354b74af506d53f295669fba115ee5a5	otu1864	D_0__Bacteria	0	2	0	0	0	0	0	0	0	0	0	0	0	0	0	0	0	0	0	0
354fa10902ce58bad4f369c07092fc41	otu1865	D_0__Bacteria	0	0	0	0	0	0	0	0	0	0	0	0	0	0	0	4	0	0	0	0
355270caca19305f199fa04f31c9186c	otu1866	D_0__Bacteria;D_1__Planctomycetes;D_2__vadinHA49;D_3__uncultured bacterium;D_4__uncultured bacterium;D_5__uncultured bacterium;D_6__uncultured bacterium	61	5	23	14	253	8	92	20	17	0	0	0	0	0	11	44	0	0	0	0
3559d2794ed044fa956b4213dc628497	otu1867	D_0__Bacteria	0	0	0	0	0	0	0	0	0	0	0	0	0	0	0	57	0	0	0	0
356694008ff84aedef3fb3c5fa71786c	otu1868	D_0__Bacteria	0	0	0	0	0	0	0	0	0	0	0	0	0	3	0	0	0	0	0	0
3567ac55868ba950abb71bba72a45953	otu1869	D_0__Bacteria	0	4	0	0	0	0	0	0	0	0	0	0	0	0	0	0	0	0	0	0
3569d9f21ebb6e7ab1b852aa0a877178	otu1870	D_0__Bacteria	0	0	0	0	0	0	0	0	0	0	0	3	0	0	0	0	0	0	0	0
356a38a4827f10e183e4001fbbe2e7b3	otu1871	D_0__Bacteria;D_1__Bacteroidetes;D_2__Bacteroidia;D_3__Cytophagales;D_4__Cyclobacteriaceae;D_5__Anditalea;D_6__Anditalea andensis	60	6	3	12	21	8	6	2	0	0	0	0	0	0	0	0	0	0	0	0
35713dc50983b967fa4ba5807f046581	otu1872	D_0__Archaea;D_1__Nanoarchaeaeota;D_2__Woesearchaeia;D_3__uncultured archaeon;D_4__uncultured archaeon;D_5__uncultured archaeon;D_6__uncultured archaeon	0	4	8	0	0	0	0	0	0	0	0	0	0	0	0	0	0	0	0	0
35794a6cdd0ecef4511cce8b74940857	otu1873	D_0__Bacteria;D_1__Bacteroidetes;D_2__Bacteroidia;D_3__Cytophagales;D_4__Cyclobacteriaceae;D_5__Belliella;D_6__Belliella pelovolcani	0	0	0	0	0	0	0	0	0	0	0	0	0	0	8	0	0	0	0	0
358357f002cb2791fe271e03f8a140fd	otu1874	D_0__Bacteria;D_1__Firmicutes;D_2__Clostridia;D_3__Clostridiales;D_4__Syntrophomonadaceae;D_5__uncultured;D_6__uncultured low G+C Gram-positive bacterium	0	0	5	0	0	0	0	0	0	0	0	0	0	0	0	0	0	0	0	0
358ae960392563b644451fc81cd4bbb5	otu1875	D_0__Bacteria;D_1__Bacteroidetes;D_2__Bacteroidia;D_3__Bacteroidales;D_4__ML635J-4 aquatic group;D_5__uncultured haloalkaliphilic bacterium;D_6__uncultured haloalkaliphilic bacterium	0	0	0	0	7	0	0	0	0	0	0	0	0	0	0	0	0	0	0	0
359afff67d6be1e12ba812ee1d27de4e	otu1876	D_0__Bacteria	0	0	0	0	0	0	0	0	0	0	0	0	0	0	1	0	0	0	0	0
35a36e7aace7d44012a55ecbf234f18a	otu1877	D_0__Archaea;D_1__Euryarchaeota;D_2__Halobacteria;D_3__Halobacteriales;D_4__Haloferacaceae;D_5__Natronobacterium;D_6__uncultured archaeon	0	0	0	0	0	11	0	0	0	0	0	0	0	0	0	4	0	0	0	0
35ae714040d7cfc03ada8429c8e62402	otu1878	D_0__Bacteria	0	0	0	0	0	0	0	0	0	0	0	0	0	0	0	0	2	0	0	0
35b7dde6d8b96098ffd7e76001dffff5	otu1879	D_0__Bacteria;D_1__Lentisphaerae;D_2__Oligosphaeria;D_3__Oligosphaerales;D_4__Oligosphaeraceae;D_5__uncultured Verrucomicrobia bacterium;D_6__uncultured Verrucomicrobia bacterium	5	57	32	58	1	1	0	7	0	0	0	0	2	0	6	11	0	0	0	0
35bbd6c28bc539bfb107268578dee306	otu1880	D_0__Bacteria	0	0	11	0	0	0	0	0	0	0	0	4	0	0	0	0	0	0	0	0
35c72162ba0d1581d13921116ec05f87	otu1881	D_0__Bacteria;D_1__Planctomycetes;D_2__Planctomycetacia;D_3__Pirellulales;D_4__Pirellulaceae;D_5__uncultured;D_6__uncultured bacterium	0	2	0	0	0	0	0	0	0	0	0	0	0	0	0	0	0	0	0	0
35c9f92c17b5fbe5d7d93c50a48e44db	otu1882	D_0__Bacteria;D_1__Firmicutes;D_2__Clostridia;D_3__Thermoanaerobacterales	0	0	0	0	0	0	0	0	0	8	0	0	0	0	0	0	0	0	0	0
35d47cc8ff120950b5ff886a02c81b48	otu1883	D_0__Archaea;D_1__Euryarchaeota;D_2__Halobacteria;D_3__Halobacteriales;D_4__Haloferacaceae;D_5__uncultured;	0	10	0	0	0	0	0	0	0	0	0	0	0	0	0	0	0	0	0	0
35d6d756ba37ed9d9a94aaefa0e0473e	otu1884	D_0__Bacteria;D_1__Cloacimonetes;D_2__Cloacimonadia;D_3__Cloacimonadales;D_4__MSBL8;D_5__uncultured bacterium;D_6__uncultured bacterium	0	24	17	48	0	0	2	0	0	0	0	0	0	0	0	0	0	0	0	0
35d7eb88effcd328766da2dbabea5c82	otu1885	D_0__Bacteria;D_1__Omnitrophicaeota;D_2__uncultured Omnitrophica bacterium;D_3__uncultured Omnitrophica bacterium;D_4__uncultured Omnitrophica bacterium;D_5__uncultured Omnitrophica bacterium;D_6__uncultured Omnitrophica bacterium	0	0	0	0	6	0	0	0	0	0	0	0	0	0	0	0	0	0	0	0
35d8b6906b9b3375e1caee3b4113f317	otu1886	D_0__Bacteria;D_1__Patescibacteria;D_2__Parcubacteria;D_3__uncultured bacterium;D_4__uncultured bacterium;D_5__uncultured bacterium;D_6__uncultured bacterium	0	0	0	0	0	0	0	0	0	4	0	0	77	120	73	0	126	64	89	25
35db2e1f407a68ff7a146e9c65ba96a2	otu1887	D_0__Bacteria;D_1__Chloroflexi;D_2__Anaerolineae;D_3__Anaerolineales;D_4__Anaerolineaceae	0	10	0	11	0	0	0	0	0	0	0	0	0	0	0	0	0	0	0	0
35e6f07ed34a8cbac81daba6ff02f274	otu1888	D_0__Bacteria;D_1__Omnitrophicaeota;D_2__uncultured bacterium;D_3__uncultured bacterium;D_4__uncultured bacterium;D_5__uncultured bacterium;D_6__uncultured bacterium	0	7	0	0	0	0	0	0	0	0	0	0	0	0	0	0	0	0	0	0
35e767dae0ead46c345f789bb3de4f77	otu1889	D_0__Bacteria	0	0	0	0	13	0	0	0	0	0	0	0	0	0	0	0	0	0	0	0
35e831e64fa1a71880de53b245cc57e0	otu1890	D_0__Bacteria;D_1__Patescibacteria;D_2__Parcubacteria;D_3__uncultured bacterium;D_4__uncultured bacterium;D_5__uncultured bacterium;D_6__uncultured bacterium	0	28	11	79	30	0	0	23	154	0	0	187	208	0	45	0	0	0	0	0
35f147048c704ab0b38b2de8ff7fe2f5	otu1891	D_0__Bacteria	0	0	0	0	0	0	0	0	0	0	0	0	0	4	0	0	0	0	0	0
35fd49f8a55f0bb8e6ba445ad24b31b0	otu1892	D_0__Bacteria	0	0	0	0	0	0	0	0	0	0	0	0	0	0	0	6	0	0	0	0
3608a187350e9815d8e60ed5522eb48b	otu1893	D_0__Archaea;D_1__Euryarchaeota;D_2__Halobacteria;D_3__Halobacteriales;D_4__Haloferacaceae	935	285	273	447	95	39	67	118	7	5	7	36	13	33	50	0	0	0	0	0
360d282a05b221537d30cfc7a6baaa26	otu1894	D_0__Archaea;D_1__Euryarchaeota;D_2__Halobacteria;D_3__Halobacteriales;D_4__Haloferacaceae;D_5__Halohasta;D_6__uncultured archaeon	0	0	0	0	0	0	0	0	0	0	0	0	11	0	23	0	0	0	0	7
360d76ebb459955283ea186f38cb8cd5	otu1895	D_0__Bacteria;D_1__Patescibacteria;D_2__Parcubacteria;D_3__uncultured bacterium;D_4__uncultured bacterium;D_5__uncultured bacterium;D_6__uncultured bacterium	0	0	0	15	0	0	0	0	0	0	0	0	0	0	0	0	0	0	0	0
3614a5eeec47c6fc32f325eebb190cf9	otu1896	D_0__Bacteria	0	0	0	0	0	11	0	0	0	0	0	0	0	0	0	0	0	0	0	0
361c64187326be64f32b14f8fce57d39	otu1897	D_0__Bacteria	0	0	0	0	0	0	0	0	83	0	0	0	0	0	25	0	0	0	0	0
3623bc48aac64b604dc03d8a83691a8a	otu1898	D_0__Bacteria	9	0	0	0	0	0	0	0	0	0	0	0	0	0	0	0	0	0	0	0
36263b902ff00cd5d2c46615c2b4b939	otu1899	D_0__Bacteria	0	0	0	0	0	0	0	0	0	0	0	0	0	0	0	2	0	0	0	0
3631aa6dd9e74078e5bb7ab6dd62febd	otu1900	D_0__Bacteria	0	0	0	0	0	0	0	0	0	0	0	0	0	0	0	2	0	0	0	0
3635283eb3ee3c290f0a235d85b58708	otu1901	D_0__Bacteria	0	0	0	0	0	0	0	0	0	0	0	0	0	0	0	0	0	3	0	0
3639ef9dbdbe3e0855e72d5455ce073c	otu1902	D_0__Archaea;D_1__Euryarchaeota;D_2__Halobacteria;D_3__Halobacteriales;D_4__Haloferacaceae;D_5__Natronoarchaeum;D_6__uncultured archaeon	0	0	0	0	0	0	0	0	0	0	0	0	0	0	0	25	0	0	0	0
3644cdc0dc31bc79233266fd2e0287df	otu1903	D_0__Bacteria;D_1__Chloroflexi;D_2__Anaerolineae;D_3__RBG-13-54-9;D_4__uncultured bacterium;D_5__uncultured bacterium;D_6__uncultured bacterium	0	0	4	0	0	0	3	0	0	0	0	0	0	0	0	0	0	0	0	0
3646b81867bd9c075b1d82190a1096f5	otu1904	D_0__Bacteria;D_1__Planctomycetes;D_2__Planctomycetacia;D_3__Pirellulales;D_4__Pirellulaceae;D_5__Pirellula;D_6__uncultured Pirellula sp.	0	0	3	0	0	0	0	0	0	0	0	0	0	0	0	0	0	0	0	0
3651535dacf344bf27c3c87348f597ce	otu1905	D_0__Bacteria	0	0	0	0	0	0	0	0	0	0	0	18	0	0	0	0	0	0	0	0
365d2eaa06c099de0a0868d8c037a44c	otu1906	D_0__Bacteria;D_1__Actinobacteria;D_2__Nitriliruptoria;D_3__Nitriliruptorales;D_4__Nitriliruptoraceae;D_5__uncultured bacterium;D_6__uncultured bacterium	0	0	13	0	0	0	0	0	0	0	0	0	0	0	0	0	0	0	0	0
365e3849b917d66bab8349038b686847	otu1907	D_0__Archaea;D_1__Asgardaeota;D_2__Lokiarchaeia	0	0	0	0	0	0	0	43	0	0	0	0	0	0	0	0	0	0	0	0
36662577515233cb400b2e294b613498	otu1908	D_0__Bacteria	1	0	0	0	0	0	0	0	0	0	0	0	0	0	0	0	0	0	0	0
3668c17d7ad292ead332929d736eea90	otu1909	D_0__Bacteria	0	0	77	0	0	0	0	0	0	0	0	0	0	0	0	0	0	0	0	0
366b2cbe5b1aa320d5e536558a414997	otu1910	D_0__Bacteria	0	0	0	0	0	0	0	0	0	0	0	2	0	0	0	0	0	0	0	0
367c544c84776566c488dc8cdf3b5988	otu1911	D_0__Archaea;D_1__Euryarchaeota;D_2__Halobacteria;D_3__Halobacteriales;D_4__Haloferacaceae;D_5__uncultured;D_6__uncultured archaeon	68	0	0	12	0	0	0	0	0	0	0	0	0	0	0	0	0	0	0	0
367c8cf1a0cea6445990fbc2e1b90069	otu1912	D_0__Bacteria	0	0	14	0	0	0	0	0	0	0	0	0	0	0	0	0	0	0	0	0
367e2473fcfb74ad0758e8a911ae96a9	otu1913	D_0__Bacteria;D_1__Omnitrophicaeota;D_2__uncultured Omnitrophica bacterium;D_3__uncultured Omnitrophica bacterium;D_4__uncultured Omnitrophica bacterium;D_5__uncultured Omnitrophica bacterium;D_6__uncultured Omnitrophica bacterium	76	295	101	156	13	118	30	120	0	26	75	0	0	72	0	0	0	0	0	0
3682dcd9b68d1374c28d188dcc0e0874	otu1914	D_0__Bacteria;D_1__Bacteroidetes;D_2__Bacteroidia;D_3__Bacteroidales;D_4__Bacteroidetes BD2-2;D_5__uncultured bacterium;D_6__uncultured bacterium	0	10	21	15	43	0	29	0	0	0	0	0	0	0	0	0	0	0	0	0
369865cbc157059f259307a54c6af86c	otu1915	D_0__Bacteria	0	0	1	0	0	0	0	0	0	0	0	0	0	0	0	0	0	0	0	0
36996e2178d587a863dbe338af1ef770	otu1916	D_0__Bacteria;D_1__Patescibacteria;D_2__Berkelbacteria;D_3__uncultured organism;D_4__uncultured organism;D_5__uncultured organism;D_6__uncultured organism	0	0	0	1	0	0	0	0	0	0	0	0	0	0	0	0	0	0	0	0
369e3d7cd92e4b159db86f8a9c5377fa	otu1917	D_0__Bacteria;D_1__Firmicutes;D_2__Clostridia;D_3__Clostridiales;D_4__Ruminococcaceae;D_5__Ruminococcaceae NK4A214 group;D_6__uncultured organism	0	0	0	0	0	0	0	0	0	1	0	0	0	0	0	0	0	0	0	0
36a0f23857b42111e368d760a63619e9	otu1918	D_0__Bacteria;D_1__Planctomycetes;D_2__Planctomycetacia;D_3__Pirellulales;D_4__Pirellulaceae;D_5__uncultured;	0	0	0	0	0	0	0	0	0	0	0	0	0	44	0	0	0	0	0	0
36a1d39d0aa8bc604d3a053c2247ba4e	otu1919	D_0__Bacteria	0	0	0	0	0	0	0	0	0	0	0	0	0	0	0	4	0	0	0	0
36a229cae4af54dc86910b6d059e6a8c	otu1920	D_0__Bacteria	0	0	0	0	0	0	0	0	3	0	0	0	0	0	0	0	0	0	0	0
36a983de9f1f5992970234e22bebbe89	otu1921	D_0__Bacteria;D_1__Planctomycetes;D_2__Planctomycetacia;D_3__Pirellulales;D_4__Pirellulaceae;D_5__Pirellula;D_6__uncultured bacterium	0	0	0	0	0	0	0	0	0	3	0	0	0	0	0	0	0	0	0	0
36a99de7fa55e2cbbcd2f3dfb065ddff	otu1922	D_0__Bacteria;D_1__Firmicutes;D_2__Clostridia;D_3__Clostridiales	0	0	0	0	4	0	0	0	0	0	0	0	0	0	0	0	0	0	0	0
36aba8daa98692ef37b69ddf4a3f359b	otu1923	D_0__Bacteria;D_1__Patescibacteria;D_2__ABY1;D_3__Candidatus Falkowbacteria	0	0	0	0	0	0	0	0	0	0	0	0	0	0	14	0	0	0	0	0
36b3096f94038798e90be77ec2e5aeb6	otu1924	D_0__Archaea;D_1__Euryarchaeota;D_2__Halobacteria;D_3__Halobacteriales;D_4__uncultured;D_5__uncultured haloarchaeon;D_6__uncultured haloarchaeon	11	10	26	10	0	57	64	0	0	0	0	0	0	0	0	0	0	0	0	0
36b451d7582b0d79aa9a23eed945b7ca	otu1925	D_0__Bacteria	0	0	0	0	0	0	0	0	2	0	0	0	0	0	0	0	0	0	0	0
36bf7c2c997e8cbd692eff341f6def41	otu1926	D_0__Archaea;D_1__Nanoarchaeaeota;D_2__Woesearchaeia;D_3__uncultured euryarchaeote;D_4__uncultured euryarchaeote;D_5__uncultured euryarchaeote;D_6__uncultured euryarchaeote	0	0	0	0	0	0	0	1	0	0	0	0	0	0	0	0	0	0	0	0
36c2b70df6ac3c661c786a0709cd4f1e	otu1927	D_0__Bacteria	0	0	3	0	0	0	0	0	0	0	0	0	0	0	0	0	0	0	0	0
36cc21182eed347b5a0c3753d1b934af	otu1928	D_0__Bacteria	0	0	0	0	0	0	0	0	0	0	0	0	0	0	4	0	0	0	0	0
36d1de6a12fdff41faa657920ad87c07	otu1929	D_0__Bacteria;D_1__Patescibacteria;D_2__Parcubacteria	17	5	19	1	0	228	0	17	0	0	0	0	0	0	0	0	0	0	0	0
36d79ca5a7ef0532bca8634b1c626255	otu1930	D_0__Bacteria	0	0	0	0	0	0	0	0	0	0	0	0	0	0	0	4	0	0	0	0
36e50329fa354229abb2a05dfaad31e1	otu1931	D_0__Bacteria;D_1__Planctomycetes;D_2__vadinHA49;D_3__uncultured organism;D_4__uncultured organism;D_5__uncultured organism;D_6__uncultured organism	0	3	0	0	3	0	0	0	0	0	0	0	0	0	0	8	0	0	0	0
36f26b2d1d193e44aab69c0780d5b14e	otu1932	D_0__Bacteria	0	0	0	0	0	0	0	0	0	0	0	0	0	0	0	17	0	0	0	0
3700911d6f928ae3f70d479113b69f1e	otu1933	D_0__Bacteria	0	0	0	0	0	0	0	0	0	0	0	1	0	0	0	0	0	0	0	0
3703cedc4c6b7365701bff4f88265109	otu1934	D_0__Bacteria;D_1__Gemmatimonadetes;D_2__Longimicrobia;D_3__Longimicrobiales;D_4__Longimicrobiaceae	0	0	0	0	0	0	0	0	0	0	0	5	0	0	0	0	0	0	0	0
3708ff7cd8d096c7547a6053fa423d47	otu1935	D_0__Bacteria	0	0	3	0	0	0	0	0	0	0	0	0	0	0	0	0	0	0	0	0
370bc1fd0944d6eef124075f915654de	otu1936	D_0__Bacteria;D_1__Kiritimatiellaeota;D_2__Kiritimatiellae;D_3__WCHB1-41	0	7	0	0	0	0	0	0	0	0	0	0	0	0	0	0	0	0	0	0
3712e9773bd2bd34056e02352c24aefd	otu1937	D_0__Bacteria;D_1__Firmicutes;D_2__Clostridia;D_3__Clostridiales;D_4__Syntrophomonadaceae;D_5__uncultured;D_6__uncultured low G+C Gram-positive bacterium	0	0	0	0	0	10	0	0	0	0	0	0	0	0	0	0	0	0	0	0
371d1f3b55ce54eb8f58ba780b652a02	otu1938	D_0__Bacteria;D_1__Planctomycetes;D_2__ODP123;D_3__uncultured organism;D_4__uncultured organism;D_5__uncultured organism;D_6__uncultured organism	0	0	0	0	0	0	0	0	0	0	0	0	0	0	0	3	0	0	0	0
37216155959a7cc0159da38cfead0ed8	otu1939	D_0__Bacteria	0	0	0	0	0	0	0	0	7	0	0	0	0	0	0	0	0	0	0	0
374e4d0b42b24e9563c4c5a78d2ef458	otu1940	D_0__Bacteria;D_1__Bacteroidetes;D_2__Bacteroidia;D_3__Cytophagales;D_4__Spirosomaceae;D_5__Flectobacillus;	0	0	0	0	3	0	0	0	0	0	0	0	0	0	0	0	0	0	0	0
37521fa06b9039b32908f44f0bda7282	otu1941	D_0__Bacteria;D_1__Bacteroidetes;D_2__Bacteroidia;D_3__Bacteroidales;D_4__ML635J-4 aquatic group;D_5__uncultured Bacteroidetes bacterium;D_6__uncultured Bacteroidetes bacterium	41	30	19	21	31	30	0	9	0	0	0	0	0	0	12	0	0	0	0	0
3755d27d04e54b533159461f8a0f7ebb	otu1942	D_0__Archaea;D_1__Euryarchaeota;D_2__Halobacteria;D_3__Halobacteriales;D_4__uncultured;D_5__uncultured haloarchaeon;D_6__uncultured haloarchaeon	0	8	0	0	0	0	5	0	0	0	0	0	0	0	0	0	0	0	12	0
375d247a9a9a50c130cc8d02da9fb323	otu1943	D_0__Archaea;D_1__Euryarchaeota;D_2__Halobacteria;D_3__Halobacteriales;D_4__Haloferacaceae;D_5__Halohasta;D_6__uncultured archaeon	0	0	0	0	0	0	0	0	0	0	0	0	0	6	0	0	0	0	0	0
37656235cdaa0cdd0340291a5047a56f	otu1944	D_0__Bacteria	0	5	0	0	0	0	0	0	0	0	0	0	0	0	0	0	0	0	0	0
376f4f8a366c05ece80d23972fdca992	otu1945	D_0__Bacteria	0	0	0	0	0	0	0	0	0	0	0	0	27	0	0	0	0	0	0	0
377122e194db61d14c840b0f9c183b20	otu1946	D_0__Bacteria	0	0	0	0	0	0	0	0	0	0	0	0	0	0	0	0	0	5	0	0
37763f157b29bd95f2efb66071ec5001	otu1947	D_0__Bacteria	3	0	0	0	0	0	0	0	17	0	0	58	10	16	0	94	0	0	0	0
377fd6374d2cd00b0427ba14f84a6973	otu1948	D_0__Bacteria;D_1__Planctomycetes;D_2__Planctomycetacia;D_3__Isosphaerales;D_4__Isosphaeraceae;D_5__uncultured;	0	0	0	0	0	0	0	0	0	0	15	0	0	0	0	0	0	0	0	0
379388a02a1c1b15124c4894f796ae65	otu1949	D_0__Bacteria	0	0	0	0	0	0	0	0	0	0	0	0	0	2	0	0	0	0	0	0
37943691c40d75d202b7e13232a57599	otu1950	D_0__Archaea;D_1__Euryarchaeota;D_2__Halobacteria;D_3__Halobacteriales;D_4__Haloferacaceae;D_5__Natrialba;	58	100	118	0	0	0	0	0	0	0	0	0	0	0	0	0	0	0	0	0
379ac1adba45e4407b79974f68041308	otu1951	D_0__Bacteria;D_1__Patescibacteria;D_2__Parcubacteria;D_3__uncultured bacterium;D_4__uncultured bacterium;D_5__uncultured bacterium;D_6__uncultured bacterium	92	87	121	101	0	3	0	0	0	0	0	0	0	0	0	0	0	0	0	0
37a489f16e122f4a06460b1725f22816	otu1952	D_0__Bacteria;D_1__Planctomycetes;D_2__Planctomycetacia;D_3__Pirellulales;D_4__Pirellulaceae;D_5__Pir4 lineage;D_6__uncultured organism	17	0	0	0	0	0	0	0	0	0	0	0	0	0	0	0	0	0	0	0
37a6f0c6b7a512ace90fce09e49b98b4	otu1953	D_0__Bacteria	0	0	0	0	0	0	0	0	0	0	0	8	0	0	0	0	0	0	0	0
37aad5f318d6804dd59f2169a0f46c2a	otu1954	D_0__Bacteria	0	0	0	0	0	0	0	0	0	0	0	0	4	0	0	0	0	0	0	0
37b085a30e2ead1d32aa08a29cd82c7c	otu1955	D_0__Bacteria;D_1__Planctomycetes;D_2__Planctomycetacia;D_3__Pirellulales;D_4__Pirellulaceae;D_5__Roseimaritima;	0	0	25	0	0	0	0	0	0	0	0	0	0	0	0	0	0	0	0	0
37c741d4a58bbb7421a2781f8fa0a7de	otu1956	D_0__Bacteria	0	0	0	0	0	0	0	0	0	0	0	0	0	0	7	0	0	0	0	0
37c8b7610a6f4e83faef81996fec8cfa	otu1957	D_0__Bacteria	0	0	0	0	0	0	0	0	0	0	0	0	0	0	0	7	0	0	0	0
37cbfd6f843f47e0c7e51f135d63473e	otu1958	D_0__Bacteria	0	0	0	0	0	0	0	0	0	0	0	0	0	0	0	0	0	42	0	0
37cccd81a0c081e60188ec937373db2d	otu1959	D_0__Archaea;D_1__Nanoarchaeaeota;D_2__Woesearchaeia	0	0	0	0	0	0	0	0	0	4	0	0	0	0	0	0	0	0	0	0
37d7000589594382c4f11ab331b6030c	otu1960	D_0__Bacteria	0	0	0	0	0	0	0	0	0	0	0	0	0	0	0	0	0	0	2	0
37d7814dec6a522839ca3f2e9639efbe	otu1961	D_0__Bacteria;D_1__Verrucomicrobia;D_2__Verrucomicrobiae;D_3__Verrucomicrobiales;D_4__Rubritaleaceae;D_5__Luteolibacter;	0	0	0	0	0	0	0	0	0	0	0	0	0	0	0	8	0	0	0	0
37e731e6e60a04a4d2c28abe513e3e32	otu1962	D_0__Archaea;D_1__Nanoarchaeaeota;D_2__Woesearchaeia;D_3__uncultured euryarchaeote;D_4__uncultured euryarchaeote;D_5__uncultured euryarchaeote;D_6__uncultured euryarchaeote	0	0	0	0	0	0	4	0	0	0	0	0	0	0	0	0	0	0	0	0
37e888c2d7ade7d7bfaf8baa92aee8bb	otu1963	D_0__Bacteria	0	0	0	0	0	0	0	20	0	0	0	0	0	0	0	0	0	0	0	0
37fd26c147f54c23abdf4f8adeb7c30a	otu1964	D_0__Archaea;D_1__Euryarchaeota;D_2__Halobacteria;D_3__Halobacteriales;D_4__Haloferacaceae;D_5__Halovenus;D_6__uncultured archaeon	0	0	7	0	0	19	0	0	0	0	0	0	0	0	0	0	11	0	0	3
380856e97587d90e517bbeebc3057b0c	otu1966	D_0__Bacteria;D_1__Patescibacteria	0	0	0	0	0	29	46	0	0	0	0	0	0	0	0	0	0	0	0	0
38090cc6406a66d7b2c3c081aeb9486e	otu1967	D_0__Bacteria	0	0	0	0	0	0	0	7	0	0	0	0	0	0	0	0	0	0	0	0
380fb31751cc67164ee85884b566d9c8	otu1968	D_0__Bacteria;D_1__Firmicutes;D_2__Clostridia;D_3__Clostridiales;D_4__Clostridiaceae 1	7	0	0	0	0	0	0	0	0	0	0	0	0	0	0	0	0	0	0	0
3810002c4b2f75ea96d35e7fb41338ea	otu1969	D_0__Bacteria	0	0	0	0	0	0	4	0	0	0	0	0	0	0	0	0	0	0	0	0
381023fe91c89738c4ff2a17a13415ec	otu1970	D_0__Bacteria;D_1__Planctomycetes;D_2__Planctomycetacia;D_3__Isosphaerales;D_4__Isosphaeraceae;D_5__Paludisphaera;	0	0	0	6	0	0	0	0	0	0	0	0	0	0	0	0	0	0	0	0
381377ed23e237f8d1fc7e51a3ef545b	otu1971	D_0__Archaea;D_1__Thaumarchaeota;D_2__Nitrososphaeria;D_3__Nitrososphaerales;D_4__Nitrososphaeraceae;D_5__Candidatus Nitrososphaera;	0	0	0	0	0	0	0	0	0	0	0	0	0	0	0	23	0	0	0	0
3816f60d9aec79e3e80bde2979e0bc7f	otu1972	D_0__Bacteria	0	0	0	0	0	0	5	0	0	0	0	0	0	0	0	0	0	0	0	0
381c1c361f665ceac91d27387cf8b159	otu1974	D_0__Bacteria	0	0	0	0	0	0	0	0	0	0	0	0	0	8	0	0	0	0	0	0
381cc5a227b7e6121bc7af168a889886	otu1975	D_0__Archaea;D_1__Euryarchaeota;D_2__Halobacteria;D_3__Halobacteriales;D_4__Haloferacaceae;D_5__uncultured;D_6__uncultured haloarchaeon	253	56	58	46	12	0	0	0	0	0	0	0	0	0	0	0	0	0	0	0
38233b2e789c22b12deab1944f242694	otu1976	D_0__Bacteria	0	8	22	0	31	0	14	0	0	6	0	0	0	0	14	0	0	0	0	0
382c265f262fe7899ccbf8dcf907b5ae	otu1977	D_0__Bacteria	0	0	0	0	0	6	0	0	0	0	0	0	0	0	0	0	0	0	0	0
38346d39933e0d2ca6b267def7dbc57e	otu1979	D_0__Bacteria;D_1__Patescibacteria;D_2__Parcubacteria;D_3__uncultured bacterium;D_4__uncultured bacterium;D_5__uncultured bacterium;D_6__uncultured bacterium	0	0	0	0	0	0	0	0	0	0	0	0	0	34	0	0	0	0	0	0
383b16dfbb50c09faf639c0671e0f7ad	otu1980	D_0__Bacteria;D_1__Firmicutes;D_2__Clostridia;D_3__uncultured low G+C Gram-positive bacterium;D_4__uncultured low G+C Gram-positive bacterium;D_5__uncultured low G+C Gram-positive bacterium;D_6__uncultured low G+C Gram-positive bacterium	0	0	0	0	0	0	3	0	0	0	0	9	5	0	0	0	0	0	0	0
3840f8cf2df05532886071f92afb3e2c	otu1981	D_0__Bacteria;D_1__Proteobacteria;D_2__Deltaproteobacteria;D_3__Desulfobacterales;D_4__Desulfobacteraceae;D_5__Desulfonatronobacter;D_6__uncultured bacterium	0	0	0	0	0	0	0	6	8	0	0	0	0	7	0	0	0	0	0	0
3843da4e2db77056ae2bc040334c1177	otu1982	D_0__Bacteria;D_1__Gemmatimonadetes;D_2__BD2-11 terrestrial group;D_3__uncultured bacterium;D_4__uncultured bacterium;D_5__uncultured bacterium;D_6__uncultured bacterium	0	7	17	0	0	0	0	2	0	0	0	0	0	0	0	0	0	0	0	0
3853a727fedc1e11127c9803faafebf4	otu1983	D_0__Bacteria	0	0	0	0	0	0	0	0	0	0	0	0	0	0	3	0	0	0	0	0
385ed69947596605a5e7ae63742d0424	otu1984	D_0__Bacteria;D_1__Proteobacteria;D_2__Gammaproteobacteria;D_3__Oceanospirillales;D_4__Halomonadaceae;D_5__Halomonas;	0	0	12	0	0	1	0	0	5	0	0	0	0	0	0	0	0	0	0	0
385fbcfc2c8baad533e3b5d147f4246a	otu1985	D_0__Bacteria;D_1__Planctomycetes;D_2__ODP123;D_3__uncultured organism;D_4__uncultured organism;D_5__uncultured organism;D_6__uncultured organism	0	0	0	0	0	0	0	0	5	0	0	0	0	0	0	0	0	0	0	0
386f3ff531587f14209b2f5b461372a7	otu1986	D_0__Bacteria	0	5	0	0	0	0	0	0	0	0	0	0	0	0	0	0	0	0	0	0
38719597b382077431a1dc5dc6b76235	otu1987	D_0__Archaea;D_1__Euryarchaeota;D_2__Thermoplasmata;D_3__uncultured	39	83	77	31	145	313	330	48	3098	1771	1483	2788	1985	2504	2143	255	2412	4067	3694	4122
388195ec7bde7dcd067209c0bcd15f0c	otu1988	D_0__Bacteria	0	0	0	0	0	0	0	0	0	0	0	0	0	0	0	0	0	0	1	0
38827cfdd4288fc04d2547f5e261d22d	otu1989	D_0__Bacteria	0	0	0	3	0	0	0	0	0	0	0	0	0	0	0	0	0	0	0	0
3884907649b17496a514c05abf95e0e1	otu1990	D_0__Bacteria;D_1__Patescibacteria;D_2__ABY1;D_3__Candidatus Uhrbacteria	0	0	0	0	0	0	0	0	5	0	0	0	0	0	0	0	0	0	0	0
388ae6723ab162fd211251ee331d10ed	otu1991	D_0__Bacteria	0	0	0	0	0	0	0	4	0	0	0	0	0	0	0	0	0	0	0	0
38905f419085e81b525209c09c6b65e6	otu1992	D_0__Bacteria	0	0	17	0	0	0	0	0	0	0	0	0	0	0	0	0	0	0	0	0
38909ed5a5c2f08db23596807e8c21e2	otu1993	D_0__Bacteria;D_1__Firmicutes;D_2__Clostridia;D_3__Clostridiales;D_4__Syntrophomonadaceae;D_5__uncultured;D_6__uncultured prokaryote	0	0	0	0	0	0	0	0	0	0	0	0	0	0	0	0	4	0	0	0
389269925fcac4f9f76bf81fab96b4b2	otu1994	D_0__Bacteria	0	0	0	0	4	0	0	0	0	0	0	0	0	0	0	0	0	0	0	0
389db5bd1c3aee6ec290768551f35b81	otu1996	D_0__Archaea;D_1__Nanoarchaeaeota;D_2__Nanohaloarchaeia;D_3__Nanohaloarchaeales;D_4__Nanohaloarchaeaceae;D_5__uncultured haloarchaeon;D_6__uncultured haloarchaeon	0	0	0	0	4	0	14	0	0	0	0	0	0	0	0	0	0	0	0	0
389e70db33d25d9b31f4e9c951826dc9	otu1997	D_0__Bacteria	0	0	0	0	0	0	0	0	0	0	0	0	0	5	0	0	0	0	0	0
38a932d94f08f344d42e808d0a9f158b	otu1998	D_0__Bacteria;D_1__Lentisphaerae;D_2__Oligosphaeria;D_3__Oligosphaerales;D_4__Oligosphaeraceae;D_5__uncultured Verrucomicrobia bacterium;D_6__uncultured Verrucomicrobia bacterium	0	0	0	0	0	0	0	0	219	20	57	0	19	47	133	0	0	0	10	19
38bb85f538a5bb8c27f3606774aec3f6	otu1999	D_0__Bacteria;D_1__Planctomycetes;D_2__Planctomycetacia;D_3__Pirellulales;D_4__Pirellulaceae;D_5__Pir4 lineage;D_6__uncultured organism	0	15	7	0	0	0	0	0	0	0	0	0	0	0	0	0	0	0	0	0
38bd22d3209ef3c49d341a5bedf1bc8e	otu2000	D_0__Bacteria;D_1__Lentisphaerae;D_2__Oligosphaeria;D_3__Oligosphaerales;D_4__Oligosphaeraceae;D_5__SBZC-1223;D_6__uncultured organism	0	0	0	0	0	0	27	28	0	0	0	0	11	0	0	0	0	0	0	0
38bd6f6853679d34ff008ae7712fcbf8	otu2001	D_0__Bacteria	0	0	0	0	0	4	0	0	0	0	0	0	0	0	0	0	0	0	0	0
38bdd225dc2fa1560ff382f7241b3d65	otu2002	D_0__Bacteria	0	0	0	0	0	0	0	0	1	0	0	0	0	0	0	0	0	0	0	0
38d148113d528944d3b0f532b1ed0334	otu2003	D_0__Bacteria	0	6	0	0	0	0	0	0	0	0	0	0	0	0	0	0	0	0	0	0
38f3cf7840ade3305b8ef4e77cc3d420	otu2004	D_0__Bacteria;D_1__Lentisphaerae;D_2__Oligosphaeria;D_3__Oligosphaerales;D_4__Lenti-2;D_5__uncultured bacterium;D_6__uncultured bacterium	0	0	5	7	0	0	0	0	0	0	0	0	0	0	0	0	0	0	0	0
38f3d119326a6a6caff969a02040aa61	otu2005	D_0__Archaea;D_1__Crenarchaeota;D_2__Bathyarchaeia;D_3__uncultured archaeon;D_4__uncultured archaeon;D_5__uncultured archaeon;D_6__uncultured archaeon	0	0	0	0	0	0	0	3	0	0	0	0	0	0	0	0	0	0	0	0
38f872306fc37b13d0d64035a2bd72ab	otu2006	D_0__Archaea;D_1__Euryarchaeota;D_2__Halobacteria;D_3__Halobacteriales;D_4__uncultured	0	0	0	0	0	0	0	0	10	0	9	0	0	0	0	0	0	0	0	0
392061bdb865375f609b13971bb2882b	otu2007	D_0__Bacteria;D_1__Omnitrophicaeota;D_2__Candidatus Omnitrophus magneticus;D_3__Candidatus Omnitrophus magneticus;D_4__Candidatus Omnitrophus magneticus;D_5__Candidatus Omnitrophus magneticus;D_6__Candidatus Omnitrophus magneticus	0	0	0	0	0	0	0	8	0	0	0	0	0	0	0	0	0	0	0	0
392c696c2b84df12d4f1ab9c8abc4d38	otu2008	D_0__Bacteria;D_1__Patescibacteria;D_2__Parcubacteria	0	0	0	0	0	0	0	0	0	0	0	0	0	0	0	5	0	0	0	0
392f1c6f43543a5c9acda2ac743396d0	otu2010	D_0__Bacteria;D_1__Chloroflexi;D_2__Gitt-GS-136;D_3__uncultured bacterium;D_4__uncultured bacterium;D_5__uncultured bacterium;D_6__uncultured bacterium	0	10	0	0	0	0	0	0	0	0	0	0	0	23	0	0	0	0	0	0
393228f0f6b7618c6233fcf2e417f048	otu2011	D_0__Bacteria;D_1__Planctomycetes;D_2__Planctomycetacia;D_3__Pirellulales;D_4__Pirellulaceae;D_5__Pir4 lineage;D_6__uncultured organism	7	0	0	2	0	0	0	0	0	0	0	0	0	0	0	0	0	0	0	0
3934a5ca9721035dfd908618d4119879	otu2012	D_0__Bacteria	0	0	0	0	0	0	5	0	0	0	0	0	0	0	0	0	0	0	0	0
3938243733e645105212f64e2fb1e38d	otu2013	D_0__Archaea;D_1__Euryarchaeota;D_2__Halobacteria;D_3__Halobacteriales;D_4__uncultured;D_5__uncultured haloarchaeon;D_6__uncultured haloarchaeon	0	0	0	0	0	9	2	0	0	0	0	0	0	0	0	0	0	0	0	0
3944d1cf181fdef40f84595219ac9fd9	otu2014	D_0__Archaea;D_1__Nanoarchaeaeota;D_2__Woesearchaeia;D_3__archaeon GW211_AR13;D_4__archaeon GW211_AR13;D_5__archaeon GW211_AR13;D_6__archaeon GW211_AR13	0	3	5	0	0	0	0	0	0	0	0	0	0	0	0	0	0	0	0	0
394b0ee5a0c0da4814225ba3ebd7ece1	otu2015	D_0__Bacteria	0	0	0	0	0	0	1	0	0	0	0	0	0	0	0	0	0	0	0	0
394bfc8298174dced8a81e1016f3139d	otu2016	D_0__Archaea;D_1__Euryarchaeota;D_2__Halobacteria;D_3__Halobacteriales	0	7	0	0	0	0	0	0	0	0	0	0	0	0	0	0	0	0	0	0
394d6de8ab8d9013787791071776e0ee	otu2017	D_0__Bacteria	0	0	0	0	0	0	0	0	0	0	0	0	0	1	0	0	0	0	0	0
394e1c4cf654f3036c69f83a9787f477	otu2018	D_0__Bacteria	5	0	0	0	0	0	0	0	0	0	0	0	0	0	0	0	0	0	0	0
394fcf00c4888268de5b9f3d11d7c603	otu2019	D_0__Bacteria;D_1__Cloacimonetes;D_2__Cloacimonadia;D_3__Cloacimonadales;D_4__MSBL8;D_5__uncultured bacterium;D_6__uncultured bacterium	0	34	12	14	0	0	0	0	0	0	0	0	0	0	0	0	0	0	0	0
39512efa8d05d957221805cb29e42396	otu2020	D_0__Bacteria	0	0	0	0	0	0	0	0	0	0	0	0	0	0	0	1	0	0	0	0
39549fc67aaeea7d1c413c5cdcf1379d	otu2021	D_0__Bacteria;D_1__Lentisphaerae;D_2__Oligosphaeria;D_3__Oligosphaerales;D_4__Oligosphaeraceae	0	20	54	0	211	20	131	466	147	282	150	48	296	95	172	0	0	0	0	0
39603b0cfdc8a5a012a02d624ac1ecf8	otu2022	D_0__Bacteria	0	0	0	0	0	4	0	0	0	0	0	0	0	0	0	0	0	0	0	0
39641ab294b3d6ebd9e308d8260b5360	otu2023	D_0__Bacteria	0	0	0	0	0	0	0	0	0	0	0	0	0	0	0	0	0	0	2	0
3968f0a236ea4f5537050dafedd1b829	otu2024	D_0__Bacteria	0	0	0	0	0	0	0	0	0	0	0	5	0	0	0	0	0	0	0	0
39774c60eadf9198b2098d567d44c460	otu2025	D_0__Bacteria	0	3	0	0	4	0	0	0	0	0	0	0	0	0	0	0	0	0	0	0
3977a1a746903dee9103892d8fe75346	otu2026	D_0__Bacteria;D_1__Spirochaetes;D_2__Spirochaetia;D_3__Spirochaetales;D_4__Spirochaetaceae;D_5__Spirochaeta 2;D_6__uncultured spirochete	0	0	0	0	4	0	1	0	0	0	0	0	0	0	0	0	0	0	0	0
3977a725773ca60f26f8b642a9e81a81	otu2027	D_0__Bacteria	0	0	0	0	0	0	0	0	0	0	0	1	0	0	0	0	0	0	0	0
3985c80c30ec0b1fef241c752af1c192	otu2028	D_0__Bacteria	0	0	0	0	0	0	0	0	0	0	33	0	0	0	45	0	0	0	0	0
3995e80e8ff413845637438071eddf27	otu2029	D_0__Bacteria	0	0	0	0	3	0	0	0	0	0	0	0	0	0	0	0	0	0	0	0
399675e9d74ce4e02eeccebe99bb022e	otu2030	D_0__Bacteria;D_1__Planctomycetes;D_2__Brocadiae;D_3__SM23-32;D_4__uncultured bacterium;D_5__uncultured bacterium;D_6__uncultured bacterium	0	0	0	0	0	0	0	0	0	0	0	0	0	4	0	0	0	0	0	0
39a75d713d3139351e0f41775ef45d61	otu2031	D_0__Bacteria;D_1__Verrucomicrobia;D_2__Verrucomicrobiae;D_3__Chthoniobacterales;D_4__uncultured;D_5__uncultured organism;D_6__uncultured organism	0	0	0	0	0	0	0	0	0	0	0	0	0	1	0	0	0	0	0	0
39aab6db116ad69e7e94b787b1bd2cd8	otu2032	D_0__Bacteria;D_1__Patescibacteria;D_2__Parcubacteria;D_3__Candidatus Moranbacteria;D_4__uncultured bacterium;D_5__uncultured bacterium;D_6__uncultured bacterium	2	0	0	0	0	0	0	0	0	0	0	0	0	0	0	0	0	0	0	0
39ae0b2bf66a8220d196ea43abea7124	otu2033	D_0__Bacteria	0	0	0	0	0	0	0	0	0	0	0	0	0	6	0	0	0	0	0	0
39aef8704f2fcd4fed637d920e5d425a	otu2034	D_0__Bacteria	0	0	0	1	0	0	0	0	0	0	0	0	0	0	0	0	0	0	0	0
39af5a9931273a1c05b98a07245d2be4	otu2035	D_0__Bacteria;D_1__Chloroflexi;D_2__Anaerolineae;D_3__SBR131;D_4__uncultured organism;D_5__uncultured organism;D_6__uncultured organism	0	0	0	0	0	0	0	0	0	0	0	0	0	0	0	3	0	0	0	0
39aff02f5fdd5677a756fb461dc317e7	otu2036	D_0__Archaea;D_1__Nanoarchaeaeota;D_2__Woesearchaeia;D_3__uncultured euryarchaeote;D_4__uncultured euryarchaeote;D_5__uncultured euryarchaeote;D_6__uncultured euryarchaeote	0	0	0	0	0	0	0	78	0	0	0	81	0	0	0	36	0	0	0	0
39b8f1aaa3daff0c070c055f441cb80c	otu2037	D_0__Bacteria;D_1__Planctomycetes;D_2__Planctomycetacia;D_3__Isosphaerales;D_4__Isosphaeraceae;D_5__uncultured;	0	0	0	0	0	0	32	21	0	0	0	0	0	20	0	0	0	0	0	0
39bb59a008995c9da0f9e0046ff6a56c	otu2038	D_0__Bacteria	0	0	0	0	0	1	0	0	0	0	0	0	0	0	0	0	0	0	0	0
39bd21bb3601b2ec21c56f8ae7190864	otu2039	D_0__Bacteria	0	0	0	0	0	0	0	0	0	0	0	0	0	0	0	0	0	0	6	0
39e3f359d052168172cfcc921f699144	otu2040	D_0__Archaea;D_1__Euryarchaeota;D_2__Halobacteria;D_3__Halobacteriales;D_4__Haloferacaceae;D_5__Natronobacterium;D_6__Natronobacterium texcoconense	0	0	0	8	0	0	0	0	0	0	0	0	0	0	0	0	0	0	0	0
39e9c3098fb65fd02f58e49a20fb812b	otu2041	D_0__Archaea;D_1__Euryarchaeota;D_2__Halobacteria;D_3__Halobacteriales;D_4__Haloferacaceae;D_5__uncultured;	173	145	119	199	49	57	56	66	0	72	97	26	0	25	25	0	0	0	0	0
39ef5af0d1e0e47accf68fcc630ad8c7	otu2042	D_0__Bacteria	0	0	0	2	0	0	0	0	0	0	0	0	0	0	0	0	0	0	0	0
39f91c43dd17157842907a96dcef52e8	otu2043	D_0__Bacteria	0	0	0	0	0	0	0	0	0	0	7	0	0	0	0	0	0	0	0	0
3a06ee9c693debac9024aea60f0524be	otu2044	D_0__Bacteria;D_1__Bacteroidetes;D_2__Bacteroidia;D_3__Bacteroidales	5	0	0	0	0	0	0	0	0	0	0	0	0	0	0	0	0	0	0	0
3a128819808927e2793609693bfb1cf5	otu2045	D_0__Bacteria;D_1__Planctomycetes;D_2__Planctomycetacia;D_3__Pirellulales;D_4__Pirellulaceae;D_5__Pir4 lineage;	0	0	0	0	0	0	0	0	0	0	0	0	0	16	0	0	0	0	0	0
3a19f3c880337a42414b881b166eed87	otu2046	D_0__Bacteria	0	0	0	0	0	0	0	0	0	0	0	0	0	0	0	0	0	6	0	0
3a33bc3f5c98c67a17f779767601b08f	otu2047	D_0__Bacteria;D_1__Planctomycetes;D_2__vadinHA49;D_3__uncultured organism;D_4__uncultured organism;D_5__uncultured organism;D_6__uncultured organism	0	10	37	5	0	0	8	0	0	0	0	0	0	0	0	0	0	0	0	0
3a4c003a9e6107541719b942e027338f	otu2049	D_0__Archaea;D_1__Thaumarchaeota;D_2__Nitrososphaeria;D_3__Nitrososphaerales;D_4__Nitrososphaeraceae;D_5__Candidatus Nitrososphaera;D_6__uncultured archaeon	0	0	0	0	0	0	0	0	0	0	0	0	0	0	0	14	0	0	0	0
3a4d1b466d1b5dc03d3327c65cc2b390	otu2050	D_0__Bacteria;D_1__Chlamydiae;D_2__Chlamydiae;D_3__Chlamydiales;D_4__Parachlamydiaceae;D_5__Neochlamydia;D_6__metagenome	5	0	0	0	0	0	0	0	0	0	0	0	0	0	0	0	0	0	0	0
3a52e3781b1999163b0e3d56012c5be4	otu2051	D_0__Bacteria	0	5	8	0	0	0	6	1	0	0	0	0	0	0	0	0	0	0	0	0
3a57e59e14b9e2e0cdd2b7f39ddcdaa0	otu2052	D_0__Bacteria	0	6	0	4	0	5	0	0	0	0	0	0	0	0	0	0	0	0	0	0
3a5ba415c333069fc1290fff6727010a	otu2053	D_0__Archaea;D_1__Euryarchaeota;D_2__Halobacteria;D_3__Halobacteriales;D_4__Haloferacaceae;D_5__Natronolimnobius;D_6__Natrialbaceae archaeon JW/NM-HA 15	99	29	13	39	0	0	0	0	0	0	0	0	0	0	0	0	0	0	0	0
3a639ff2ad0c133883716be11488a5cd	otu2054	D_0__Bacteria;D_1__Tenericutes;D_2__Mollicutes;D_3__Haloplasmatales;D_4__Haloplasmataceae;D_5__Haloplasma;	0	0	0	2	0	0	0	0	0	0	0	0	0	0	0	0	0	0	0	0
3a65c679aae24607983c1d59477d029e	otu2055	D_0__Bacteria;D_1__Chloroflexi;D_2__Chloroflexia;D_3__Thermomicrobiales;D_4__Thermomicrobiaceae;D_5__Nitrolancea;D_6__uncultured Chloroflexi bacterium	0	3	0	0	0	0	0	0	0	0	0	0	0	0	0	0	0	0	0	0
3a6f989956011638f8cb4647b845c530	otu2056	D_0__Bacteria	0	0	20	0	0	0	0	0	0	0	0	0	0	0	0	0	0	0	0	0
3a77ab196689627f261dada69cebf11c	otu2057	D_0__Bacteria	0	0	0	0	0	0	0	0	0	0	0	1	0	0	0	0	0	0	0	0
3a7e8ef392f02e01326c283995de18cb	otu2058	D_0__Bacteria	0	6	0	0	0	0	0	0	0	0	0	0	0	0	0	0	0	0	0	0
3a953053f3a67c0e758210000647f4cc	otu2060	D_0__Bacteria;D_1__Bacteroidetes;D_2__Bacteroidia;D_3__Bacteroidales;D_4__ML635J-4 aquatic group;D_5__uncultured Bacteroidetes bacterium;D_6__uncultured Bacteroidetes bacterium	0	0	0	0	0	0	0	0	0	0	0	0	0	17	14	0	0	0	0	0
3aaa508d81f4437f2dccfa97cbb10578	otu2061	D_0__Bacteria;D_1__Patescibacteria;D_2__Parcubacteria;D_3__uncultured bacterium;D_4__uncultured bacterium;D_5__uncultured bacterium;D_6__uncultured bacterium	0	0	0	0	0	0	0	0	7	13	0	6	31	3	12	0	0	0	0	0
3aae1b8123b44a1fadfcd794ed516957	otu2062	D_0__Bacteria;D_1__Patescibacteria;D_2__Gracilibacteria;D_3__Candidatus Peregrinibacteria;D_4__uncultured bacterium;D_5__uncultured bacterium;D_6__uncultured bacterium	0	0	7	0	0	0	0	0	0	0	0	0	0	0	0	0	0	0	0	0
3ab5951764fa9333ed83429781366e16	otu2063	D_0__Bacteria	0	4	1	0	0	1	0	0	0	0	0	0	0	0	0	0	0	0	0	0
3ab855545dc6f785a525ab1d426530d1	otu2064	D_0__Archaea;D_1__Nanoarchaeaeota;D_2__Nanohaloarchaeia;D_3__Aenigmarchaeales;D_4__hypersaline lake metagenome;D_5__hypersaline lake metagenome;D_6__hypersaline lake metagenome	0	8	0	0	0	0	7	0	0	0	0	0	0	0	0	0	0	0	0	0
3ab905662f71da9ace4308b1a2947b0c	otu2065	D_0__Bacteria	0	0	0	0	0	0	0	0	0	0	0	7	0	0	0	0	0	0	0	0
3ad7ffca7eb2fc9137246d2872406008	otu2067	D_0__Bacteria;D_1__Verrucomicrobia;D_2__Verrucomicrobiae;D_3__Verrucomicrobiales;D_4__Rubritaleaceae;D_5__Luteolibacter;	5	0	0	0	0	0	6	0	0	0	0	0	0	0	0	0	0	0	0	0
3aec1a465f6ecae8c961001e2d2481e3	otu2069	D_0__Archaea;D_1__Euryarchaeota;D_2__Halobacteria;D_3__Halobacteriales;D_4__Haloferacaceae	15	0	0	0	8	0	0	0	0	0	0	0	0	0	0	0	0	0	0	0
3af306b070ee703b7b58914d195e83ad	otu2070	D_0__Archaea;D_1__Nanoarchaeaeota;D_2__Woesearchaeia;D_3__uncultured euryarchaeote;D_4__uncultured euryarchaeote;D_5__uncultured euryarchaeote;D_6__uncultured euryarchaeote	0	0	0	0	0	0	0	14	0	0	0	0	0	0	0	0	0	0	0	0
3afde44721f07dbc67dc198f909729a4	otu2071	D_0__Bacteria;D_1__Bacteroidetes;D_2__Bacteroidia;D_3__Bacteroidales;D_4__Prevotellaceae;D_5__Alloprevotella;	0	8	0	1	0	0	0	0	0	0	0	0	0	0	0	0	0	0	0	0
3b043c1c9edda2c03d9d66e9ddf4e9ac	otu2072	D_0__Bacteria;D_1__Actinobacteria;D_2__Thermoleophilia;D_3__Solirubrobacterales;D_4__67-14	0	0	0	0	0	0	0	0	0	0	0	0	0	0	0	2	0	0	0	0
3b15328318653cab04993222f5be4980	otu2073	D_0__Archaea;D_1__Euryarchaeota;D_2__Halobacteria;D_3__Halobacteriales;D_4__Haloferacaceae;D_5__Natronorubrum;D_6__Natronorubrum bangense	0	0	2	0	0	0	0	0	0	0	0	0	0	0	0	0	0	0	0	0
3b15f594659e7dd13c4c51f35e4cc70b	otu2074	D_0__Bacteria;D_1__Patescibacteria;D_2__Parcubacteria;D_3__Candidatus Kaiserbacteria;D_4__uncultured organism;D_5__uncultured organism;D_6__uncultured organism	0	3	0	0	0	0	0	0	0	0	0	0	0	0	0	0	0	0	0	0
3b1f9563c8750a515d73882bd99c6bcb	otu2075	D_0__Bacteria;D_1__Latescibacteria;D_2__Latescibacteria;D_3__Latescibacterales;D_4__Latescibacteraceae;D_5__Candidatus Latescibacter;D_6__uncultured bacterium	0	0	0	0	0	0	6	0	0	0	0	0	0	0	0	0	0	0	0	0
3b2071d601c8d512b1536d904da0f614	otu2076	D_0__Bacteria	2	0	0	0	0	0	0	0	0	0	0	0	0	0	0	0	0	0	0	0
[truncated: 6,601 more rows]

## Sheet: Table S3
Table S3 General information of metagenomic sequencing
Sample names	Sample name in NCBI	Raw base (Gbp)	Q20 (%)	Q30 (%)	GC content (mol%)	Clean base (Gbp)
DK1Sed7	DK1	18.18	98.21	94.72	54.62	18.1
DK3Sed8	DK3	18.75	98.19	94.75	56.22	18.66
DK15Sed18	DK15	19	97.89	94.03	49.34	18.89
DK24Sed24	DK24	16.15	98.11	94.41	49.3	16.07
DK33Sed33	DKS	16.72	98.21	94.73	52.86	16.63

## Sheet: Table S4
Table S4 General feature, classfification and abundance of metagenome-assembled genomes
MAG ID	MAG renamed for Ca. Natranaeroarchaeales	Size (bp)	GC (mol%)	Contig number	N50 (bp)	Completeness (%)	Contamination (%)	Classification in GTDB	Abundance
									DK1Sed7	DK3Sed8	DK15Sed18	DK24Sed24	DK33Sed33
DKSSA4_metawrap_30_20_bin.56	-	826701	43	968	5385	51.4	1.869	d__Archaea;p__Hadarchaeota;c__Hadarchaeia;o__;f__;g__;s__	0	0	0.499357	0	1.69388
DKSSA4_metawrap_30_20_bin.76	-	584286	48.7	645	6105	34.27	0	d__Archaea;p__Hadarchaeota;c__Hadarchaeia;o__;f__;g__;s__	0	0	0.494111	0	1.92079
DKSSA4_metawrap_30_20_bin.152	-	904581	68.2	1382	1317	32.62	2.803	d__Archaea;p__Halobacteriota;c__Halobacteria;o__Halobacteriales;f__Haloarculaceae;g__;s__	0.138493	0.152714	0	0	2.20306
DKSSA4_metawrap_30_20_bin.115	-	1326229	56.6	1886	1478	30.59	0.311	d__Archaea;p__Halobacteriota;c__Halobacteria;o__Halobacteriales;f__Haloarculaceae;g__Halovenus;s__	0	0	0.053227	0	1.71637
DKSSA4_metawrap_30_20_bin.128	-	2183325	57.5	2784	2782	77.17	2.585	d__Archaea;p__Halobacteriota;c__Halobacteria;o__Halobacteriales;f__Haloarculaceae;g__Halovenus;s__	0	0.046803	0	0	1.88749
DKSSA4_metawrap_30_20_bin.181	-	2988941	58	3321	10309	85.82	4.266	d__Archaea;p__Halobacteriota;c__Halobacteria;o__Halobacteriales;f__Haloarculaceae;g__Halovenus;s__	0.023802	0.059951	0.017881	0	5.0582
DKSSA4_metawrap_30_20_bin.189	-	1663419	57.6	2011	4326	35.51	0.934	d__Archaea;p__Halobacteriota;c__Halobacteria;o__Halobacteriales;f__Haloarculaceae;g__Halovenus;s__	0	0.014699	0	0	2.17418
DKSSA4_metawrap_30_20_bin.3	-	2570868	55.5	2857	10111	95.05	1.787	d__Archaea;p__Halobacteriota;c__Halobacteria;o__Halobacteriales;f__Haloarculaceae;g__Halovenus;s__Halovenus sp001564135	0.014042	0.09176	0.118176	0	2.6978
DKSSA4_metawrap_30_20_bin.122	-	2618885	63.4	2847	15018	89.09	5.106	d__Archaea;p__Halobacteriota;c__Halobacteria;o__Halobacteriales;f__Haloarculaceae;g__Natronomonas;s__	0.087142	0.093394	0.020337	0	2.95706
DKSSA4_metawrap_30_20_bin.16	-	1292722	68	1742	2921	54.62	1.631	d__Archaea;p__Halobacteriota;c__Halobacteria;o__Halobacteriales;f__Haloarculaceae;g__Natronomonas;s__	0.035909	0.029348	0	0	2.35524
DKSSA4_metawrap_30_20_bin.117	-	1522127	69.9	2025	1717	40.01	0.851	d__Archaea;p__Halobacteriota;c__Halobacteria;o__Halobacteriales;f__Haloarculaceae;g__Natronomonas;s__Natronomonas sp007135435	0.584286	0.527287	0	0	2.20093
DKSSA4_metawrap_30_20_bin.141	-	1521894	61.2	1820	6902	62.55	3.612	d__Archaea;p__Halobacteriota;c__Halobacteria;o__Halobacteriales;f__Haloferacaceae;g__Halohasta;s__	0.095643	0.130709	0.031988	0.007729	2.78355
DKSSA4_metawrap_30_20_bin.121	-	1067674	66.7	1151	8453	35.27	0.38	d__Archaea;p__Halobacteriota;c__Halobacteria;o__Halobacteriales;f__Haloferacaceae;g__Halorubrum;s__	0.028823	0.088659	0.007279	0	4.96816
DKSSA4_metawrap_30_20_bin.62	-	790029	68.6	943	3529	32.55	0	d__Archaea;p__Halobacteriota;c__Halobacteria;o__Halobacteriales;f__Haloferacaceae;g__Halorubrum;s__	0.029095	0.089734	0	0	5.19352
DKSSA4_metawrap_30_20_bin.70	-	974230	67.9	1095	8286	30.84	0	d__Archaea;p__Halobacteriota;c__Halobacteria;o__Halobacteriales;f__Haloferacaceae;g__Halorubrum;s__	0.035091	0.151432	0.010049	0	3.33546
DKSSA4_metawrap_30_20_bin.83	-	1531044	69	1908	3308	38.31	7.943	d__Archaea;p__Halobacteriota;c__Halobacteria;o__Halobacteriales;f__Haloferacaceae;g__Halorubrum;s__	0.024693	0.117625	0	0	3.11024
DKSSA4_metawrap_30_20_bin.176	-	2620308	64.6	2875	14463	91.85	3.685	d__Archaea;p__Halobacteriota;c__Halobacteria;o__Halobacteriales;f__Haloferacaceae;g__J07HR59;s__	0.031605	0.066419	0.0273	0.003606	19.7681
DKSSA4_metawrap_30_20_bin.97	-	2296941	65	2438	15884	82.97	1.928	d__Archaea;p__Halobacteriota;c__Halobacteria;o__Halobacteriales;f__Haloferacaceae;g__J07HR59;s__	0.024942	0.05359	0.003751	0	6.76697
DKSSA4_metawrap_30_20_bin.199	-	3009082	51.1	4480	1524	30.48	1.647	d__Archaea;p__Halobacteriota;c__Halobacteria;o__Halobacteriales;f__Haloferacaceae;g__N1521;s__	0	0	0	0	1.96076
DKSSA4_metawrap_30_20_bin.80	-	1620710	62.1	1889	10669	80.03	1.837	d__Archaea;p__Halobacteriota;c__Halobacteria;o__Halobacteriales;f__Haloferacaceae;g__PL-Br10-E2g29;s__	0.027262	0.023794	0.041719	0	2.90705
DKSSA4_metawrap_30_20_bin.32	-	2521684	67.1	2798	9262	54.67	19.15	d__Archaea;p__Halobacteriota;c__Halobacteria;o__Halobacteriales;f__Natrialbaceae;g__;s__	0.325212	0.212861	0	0.005301	3.45596
DKSSA4_metawrap_30_20_bin.142	-	2085671	64.8	2323	10509	40.19	8.23	d__Archaea;p__Halobacteriota;c__Halobacteria;o__Halobacteriales;f__Natrialbaceae;g__Natrarchaeobius;s__	0.40471	0.242155	0.002035	0.008383	3.76736
DK1SA4_metawrap_30_20_bin.4	-	3436859	61.4	3629	17965	95.63	0.982	d__Archaea;p__Halobacteriota;c__Halobacteria;o__Halobacteriales;f__Natrialbaceae;g__Natronorubrum;s__Natronorubrum bangense	1.90927	0.372679	0.02536	0.029773	1.39889
DKSSA4_metawrap_30_20_bin.154	-	1764942	60.8	1930	12729	40.57	7.476	d__Archaea;p__Halobacteriota;c__Halobacteria;o__Halobacteriales;f__Natrialbaceae;g__Natronorubrum;s__Natronorubrum bangense	0.763671	0.242948	0.015727	0.02168	1.704
DKSSA4_metawrap_30_20_bin.196	-	2126629	61	3227	1295	32.96	9.076	d__Archaea;p__Halobacteriota;c__Halobacteria;o__Halobacteriales;f__Natrialbaceae;g__Tc-Br11;s__	0	0	0	0	1.99736
DKSSA4_metawrap_30_20_bin.151	-	2096515	62.6	2307	16383	66.35	3.271	d__Archaea;p__Halobacteriota;c__Halobacteria;o__Halobacteriales;f__Natronoarchaeaceae;g__Natronoarchaeum;s__	0.067243	0.077998	0.004943	0.019675	3.57173
DKSSA4_metawrap_30_20_bin.106	-	2079685	47.1	2192	12397	89.58	3.266	d__Archaea;p__Halobacteriota;c__Halobacteria;o__Halobacteriales;f__Salinarchaeaceae;g__Salinarchaeum;s__	0	0.004449	0.017598	0	8.8972
DKSSA4_metawrap_30_20_bin.28	-	2128384	59.5	2320	23230	94.74	1.437	d__Archaea;p__Halobacteriota;c__Halobacteria;o__Halobacteriales;f__SKSH01;g__SKSH01;s__	0.076306	0.383485	0	0	2.99158
DKSSA4_metawrap_30_20_bin.135	-	6103870	34.9	10480	1316	47.48	12.76	d__Archaea;p__Halobacteriota;c__Methanonatronarchaeia;o__;f__;g__;s__	0	0	0.085582	0	1.87555
DKSSA4_metawrap_30_20_bin.86	-	1057402	33.7	1210	2818	40.18	0	d__Archaea;p__Halobacteriota;c__Methanonatronarchaeia;o__Methanonatronarchaeales;f__Methanonatronarchaeaceae;g__;s__	0	0	0.114832	0	1.77147
DKSSA4_metawrap_30_20_bin.25	-	541661	39.3	665	10743	42.99	1.869	d__Archaea;p__Iainarchaeota;c__Iainarchaeia;o__B1Sed10-29;f__B1Sed10-29;g__B1Sed10-29;s__	0	0	0	0	3.06246
DKSSA4_metawrap_30_20_bin.74	-	508124	36.2	682	5854	49.42	5.607	d__Archaea;p__Iainarchaeota;c__Iainarchaeia;o__B1Sed10-29;f__B1Sed10-29;g__B1Sed10-29;s__	0	0	0	0	2.15128
DKSSA4_metawrap_30_20_bin.30	-	562209	38.3	679	15525	69.62	0	d__Archaea;p__Iainarchaeota;c__Iainarchaeia;o__B1Sed10-29;f__B1Sed10-29;g__B1Sed10-29;s__B1Sed10-29 sp003553825	0	0	0.029997	0	5.69264
DK3SA4_metawrap_30_20_bin.197	-	452929	40.5	693	2100	69.94	0	d__Archaea;p__Iainarchaeota;c__Iainarchaeia;o__B1Sed10-29;f__B1Sed10-29;g__CSSED10-269;s__	0	1.45013	0.401943	0	0
DK15SA4_metawrap_30_20_bin.148	-	716792	31	1050	2978	54.63	19	d__Archaea;p__Nanoarchaeota;c__Nanoarchaeia;o__Pacearchaeales;f__GW2011-AR1;g__;s__	0	0.231861	2.04921	0	0
DKSSA4_metawrap_30_20_bin.191	-	609866	46.3	823	5969	86.99	1.401	d__Archaea;p__PWEA01;c__PWEA01;o__PWEA01;f__PWEA01;g__;s__	0	0	0.334796	0.007719	13.8703
DKSSA4_metawrap_30_20_bin.175	-	380748	49.9	485	4841	55.91	0.934	d__Archaea;p__PWEA01;c__PWEA01;o__PWEA01;f__PWEA01;g__T1SED10-213;s__	0	0	0	0	2.06754
DKSSA4_metawrap_30_20_bin.193	-	1071750	62.6	1442	2772	75.86	2.284	d__Archaea;p__Thermoplasmatota;c__Thermoplasmata;o__Methanomassiliicoccales;f__Methanomethylophilaceae;g__PWHV01;s__PWHV01 sp003555025	0	0.174216	0	0	1.78419
DK15SA4_metawrap_30_20_bin.122	HAT8	1240397	41.8	1678	2250	35.4	6.4	d__Archaea;p__Thermoplasmatota;c__Thermoplasmata;o__PWKY01;f__PWKY01;g__;s__	0	0	0.818488	0	1.50555
DK15SA4_metawrap_30_20_bin.128	HAT10	1026545	43.9	1348	1908	42.99	14.4	d__Archaea;p__Thermoplasmatota;c__Thermoplasmata;o__PWKY01;f__PWKY01;g__;s__	0	0	0.798419	0	1.86878
DK15SA4_metawrap_30_20_bin.147	HAT3	1062309	38.3	1480	2674	31.61	1.401	d__Archaea;p__Thermoplasmatota;c__Thermoplasmata;o__PWKY01;f__PWKY01;g__;s__	0	0	1.05798	0.025433	1.47587
DK15SA4_metawrap_30_20_bin.75	HAT11	953798	38.2	1311	2616	36.76	7.476	d__Archaea;p__Thermoplasmatota;c__Thermoplasmata;o__PWKY01;f__PWKY01;g__;s__	0	0	0.886184	0	2.06792
DK24SA4_metawrap_30_20_bin.110	HAT17	880615	41.3	1061	5996	53.36	0.8	d__Archaea;p__Thermoplasmatota;c__Thermoplasmata;o__PWKY01;f__PWKY01;g__;s__	0.03254	0.181753	1.12883	26.1604	1.93525
DK24SA4_metawrap_30_20_bin.57	HAT15	1978610	42.4	2112	17333	95.07	4	d__Archaea;p__Thermoplasmatota;c__Thermoplasmata;o__PWKY01;f__PWKY01;g__;s__	0	0	0.937943	2.52265	6.45742
DKSSA4_metawrap_30_20_bin.103	HAT19	779013	42.4	1165	1394	30.05	6.062	d__Archaea;p__Thermoplasmatota;c__Thermoplasmata;o__PWKY01;f__PWKY01;g__;s__	0	0	0	0	1.75212
DKSSA4_metawrap_30_20_bin.113	HAT12	1242304	40.2	1330	21899	56.07	17.75	d__Archaea;p__Thermoplasmatota;c__Thermoplasmata;o__PWKY01;f__PWKY01;g__;s__	0	0.004031	0.661054	0.011237	7.91187
DKSSA4_metawrap_30_20_bin.123	HAT2	1981578	38.6	2837	1793	48.89	18.39	d__Archaea;p__Thermoplasmatota;c__Thermoplasmata;o__PWKY01;f__PWKY01;g__;s__	0	0	0.097957	0	1.9213
DKSSA4_metawrap_30_20_bin.13	HAT16	549799	40.1	564	14289	33.96	5.66	d__Archaea;p__Thermoplasmatota;c__Thermoplasmata;o__PWKY01;f__PWKY01;g__;s__	0.002781	0.106423	1.15899	4.82582	4.40181
DKSSA4_metawrap_30_20_bin.136	HAT13	1220914	40.3	1280	27002	57.25	12.9	d__Archaea;p__Thermoplasmatota;c__Thermoplasmata;o__PWKY01;f__PWKY01;g__;s__	0.005598	0.005062	0.397303	0.010749	31.5901
DKSSA4_metawrap_30_20_bin.47	HAT20	1045133	45.5	1242	2784	43.23	11.75	d__Archaea;p__Thermoplasmatota;c__Thermoplasmata;o__PWKY01;f__PWKY01;g__;s__	0	0	0.02669	0	1.86973
DKSSA4_metawrap_30_20_bin.61	HAT9	1019326	42.6	1271	2807	38.77	8.059	d__Archaea;p__Thermoplasmatota;c__Thermoplasmata;o__PWKY01;f__PWKY01;g__;s__	0	0	0.031498	0	1.87488
DKSSA4_metawrap_30_20_bin.84	HAT18	939084	42.9	960	10779	34.86	12	d__Archaea;p__Thermoplasmatota;c__Thermoplasmata;o__PWKY01;f__PWKY01;g__;s__	0	0.008761	0.809082	0.114235	5.08341
DK15SA4_metawrap_30_20_bin.106	HAT1	869816	38.7	1016	6739	30.4	8.411	d__Archaea;p__Thermoplasmatota;c__Thermoplasmata;o__PWKY01;f__PWKY01;g__B1SED10-34;s__	0	0.009821	1.35756	0.040177	3.10506
DK15SA4_metawrap_30_20_bin.51	HAT6	1385394	39.5	1556	14504	77.03	3.225	d__Archaea;p__Thermoplasmatota;c__Thermoplasmata;o__PWKY01;f__PWKY01;g__B1SED10-34;s__	0	0.047896	4.04967	0.113192	2.38452
DKSSA4_metawrap_30_20_bin.124	HAT4	869714	40.5	958	11417	52.89	8	d__Archaea;p__Thermoplasmatota;c__Thermoplasmata;o__PWKY01;f__PWKY01;g__B1SED10-34;s__	0	0.004094	0.576363	0.031714	5.26113
DKSSA4_metawrap_30_20_bin.203	HAT7	872053	37.3	1051	7758	38.53	4.672	d__Archaea;p__Thermoplasmatota;c__Thermoplasmata;o__PWKY01;f__PWKY01;g__B1SED10-34;s__	0	0.005175	0.459807	0.103997	3.99316
DKSSA4_metawrap_30_20_bin.59	HAT5	836019	36.7	966	7638	48.8	4.8	d__Archaea;p__Thermoplasmatota;c__Thermoplasmata;o__PWKY01;f__PWKY01;g__B1SED10-34;s__	0	0.016254	0.624293	0.032992	6.34448
DK15SA4_metawrap_30_20_bin.80	HAT14	1000539	42.8	1120	15179	38.82	9.433	d__Archaea;p__Thermoplasmatota;c__Thermoplasmata;o__PWKY01;f__PWKY01;g__PWHR01;s__	0.003393	0.008873	2.22013	2.1756	5.68155
DKSSA4_metawrap_30_20_bin.39	HAT22	527951	42.1	566	12643	30.93	1.852	d__Archaea;p__Thermoplasmatota;c__Thermoplasmata;o__PWKY01;f__PWKY01;g__PWHR01;s__	0	0	0.022416	0	2.70109
DKSSA4_metawrap_30_20_bin.120	HAT23	1859587	43.6	1774	18372	87.2	1.6	d__Archaea;p__Thermoplasmatota;c__Thermoplasmata;o__PWKY01;f__PWKY01;g__PWHR01;s__PWHR01 sp003551675	0	0.06064	0.433169	0.010059	5.33939
DKSSA4_metawrap_30_20_bin.12	HAT21	1767305	44.8	1654	26154	78	2.4	d__Archaea;p__Thermoplasmatota;c__Thermoplasmata;o__PWKY01;f__PWKY01;g__PWHR01;s__PWHR01 sp003555395	0	0.000594	1.24236	0.072679	13.5189
DK15SA4_metawrap_30_20_bin.127	HAT27	1580737	44.5	1590	14641	87.28	3.2	d__Archaea;p__Thermoplasmatota;c__Thermoplasmata;o__PWKY01;f__PWKY01;g__PWKY01;s__	0	0.495107	3.18092	0.011188	0.055815
DK15SA4_metawrap_30_20_bin.34	HAT29	1100598	47.1	1234	5369	62.47	3.753	d__Archaea;p__Thermoplasmatota;c__Thermoplasmata;o__PWKY01;f__PWKY01;g__PWKY01;s__PWKY01 sp003553085	0	0.465188	0.907483	0	0.900022
DK3SA4_metawrap_30_20_bin.179	HAT30	1861678	46.4	1944	8177	82.18	4.861	d__Archaea;p__Thermoplasmatota;c__Thermoplasmata;o__PWKY01;f__PWKY01;g__PWKY01;s__PWKY01 sp003553085	0	1.31026	0.505256	0	1.01022
DKSSA4_metawrap_30_20_bin.71	HAT28	2036712	46.1	2035	9871	86.46	5.2	d__Archaea;p__Thermoplasmatota;c__Thermoplasmata;o__PWKY01;f__PWKY01;g__PWKY01;s__PWKY01 sp003553085	0	0.581409	0.59796	0	2.84282
DK1SA4_metawrap_30_20_bin.101	HAT24	1822596	49.8	1754	22054	91.2	1.6	d__Archaea;p__Thermoplasmatota;c__Thermoplasmata;o__PWKY01;f__PWKY01;g__SKVC01;s__	2.8795	0.539532	0.008913	0	0
DK3SA4_metawrap_30_20_bin.8	HAT25	2081988	45.2	2006	15041	95.86	3.2	d__Archaea;p__Thermoplasmatota;c__Thermoplasmata;o__PWKY01;f__PWKY01;g__SKVC01;s__	0.012902	2.35276	0.206479	0.003775	0
DK3SA4_metawrap_30_20_bin.148	HAT26	1484469	43.4	1519	24372	90.27	0	d__Archaea;p__Thermoplasmatota;c__Thermoplasmata;o__PWKY01;f__PWKY01;g__SKVC01;s__SKVC01 sp007129655	0	2.29024	1.26394	0	0.136618
DK24SA4_metawrap_30_20_bin.122	-	2869421	33.3	4266	1389	35.11	5.825	d__Archaea;p__Thermoproteota;c__Nitrososphaeria;o__Nitrososphaerales;f__Nitrosopumilaceae;g__;s__	0.132379	0.0917945	0.144009	1.76285	0
DK3SA4_metawrap_30_20_bin.22	-	1307538	0.548	1315	24157	98	0.222	d__Bacteria;p__Firmicutes;c__Bacilli;o__Izemoplasmatales;f__Izemoplasmataceae;g__T1SED10-81;s__T1SED10-81 sp003568315	0.003784	2.84772	0.602805	0.06951	0.210906
DKSSA4_metawrap_30_20_bin.155	-	1076579	0.494	1209	6281	80.39	1.333	d__Bacteria;p__Firmicutes;c__Bacilli;o__Izemoplasmatales;f__Izemoplasmataceae;g__T1SED10-81;s__T1SED10-81 sp003554025	0	0.353881	0.081285	0.009837	1.96978
DKSSA4_metawrap_30_20_bin.165	-	1346919	0.529	1355	89087	98.66	0	d__Bacteria;p__Firmicutes;c__Bacilli;o__Izemoplasmatales;f__Izemoplasmataceae;g__T1SED10-81;s__T1SED10-81 sp003553945	0.007981	0.017232	0.019092	0.004465	5.96128
DK3SA4_metawrap_30_20_bin.93	-	351358	0.412	420	3289	31.44	1.754	d__Bacteria;p__Firmicutes;c__Bacilli;o__Izemoplasmatales;f__Izemoplasmataceae;g__B1SED10-225;s__B1SED10-225 sp003558105	0	1.31146	0.548592	0	0.03141
DK3SA4_metawrap_30_20_bin.31	-	740711	0.407	1105	1493	45.32	5.09	d__Bacteria;p__Firmicutes;c__Bacilli;o__Izemoplasmatales;f__Izemoplasmataceae;g__B1SED10-225;s__B1SED10-225 sp003558105	0	1.3374	0.411901	0	0
DKSSA4_metawrap_30_20_bin.54	-	2049320	0.497	1973	30190	76.9	2.895	d__Bacteria;p__Firmicutes_D;c__Dethiobacteria;o__DTU022;f__DTU022;g__B1SED10-74M;s__B1SED10-74M sp003554615	0.030475	0.225603	3.01952	4.59289	3.23305
DK3SA4_metawrap_30_20_bin.89	-	1016046	0.515	1079	6868	42.75	0.564	d__Bacteria;p__Firmicutes_D;c__Dethiobacteria;o__DTU022;f__DTU022;g__B1SED10-74M;s__B1SED10-74M sp003554395	4.99423	15.0814	1.21312	2.4864	0.869417
DK1SA4_metawrap_30_20_bin.91	-	971508	0.434	993	11729	51.72	1.724	d__Bacteria;p__Firmicutes_D;c__Dethiobacteria;o__DTU022;f__DTU022;g__B1SED10-74M;s__B1SED10-74M sp007128625	9.62267	7.58032	4.25352	7.62137	0.086628
DK15SA4_metawrap_30_20_bin.152	-	886230	0.457	862	10919	36.07	6.991	d__Bacteria;p__Firmicutes_D;c__Dethiobacteria;o__DTU022;f__DTU022;g__B1SED10-74M;s__B1SED10-74M sp007128625	0.799721	2.45234	4.11188	4.03559	0.072226
DK3SA4_metawrap_30_20_bin.81	-	1486788	0.462	1379	59459	55.17	0	d__Bacteria;p__Firmicutes_D;c__Dethiobacteria;o__DTU022;f__DTU022;g__B1SED10-74M;s__B1SED10-74M sp007130825	0.021844	1.00553	0.993966	4.92314	1.13688
DK3SA4_metawrap_30_20_bin.40	-	701773	0.497	676	33598	37.4	2.234	d__Bacteria;p__Firmicutes_D;c__Dethiobacteria;o__DTU022;f__DTU022;g__B1SED10-74M;s__B1SED10-74M sp007130825	0.043295	1.20126	1.05119	7.1433	1.4357
DK1SA4_metawrap_30_20_bin.164	-	1766166	0.458	1750	16784	85.94	0.635	d__Bacteria;p__Firmicutes_D;c__Dethiobacteria;o__DTU022;f__DTU022;g__T3SED10-7;s__T3SED10-7 sp007127255	15.0153	4.36276	1.12594	13.5267	0.068708
DK1SA4_metawrap_30_20_bin.138	-	1250214	0.506	1186	54168	42.16	10.22	d__Bacteria;p__Firmicutes_D;c__Dethiobacteria;o__DTU022;f__DTU022;g__T3SED10-7;s__T3SED10-7 sp007119965	6.03844	3.46479	0.123418	0.249915	0.037399
DK1SA4_metawrap_30_20_bin.136	-	2345562	0.45	2467	7772	73.99	5.508	d__Bacteria;p__Firmicutes_D;c__Dethiobacteria;o__DTU022;f__DTU022;g__T3SED10-7;s__T3SED10-7 sp003564505	2.84904	4.01434	1.19306	1.22314	2.24922
DK15SA4_metawrap_30_20_bin.153	-	1693069	0.422	1649	14761	70.66	3.813	d__Bacteria;p__Firmicutes_D;c__Dethiobacteria;o__DTU022;f__PWGO01;g__B1SED10-75;s__B1SED10-75 sp003550565	0	0.059339	4.19918	0.121429	1.38381
DK3SA4_metawrap_30_20_bin.64	-	1789328	0.535	1723	83132	85.74	0.847	d__Bacteria;p__Firmicutes_D;c__Dethiobacteria;o__DTU022;f__UBA8154;g__SKMY01;s__SKMY01 sp003556225	4.57862	4.33505	2.01925	6.06528	1e-06
DK15SA4_metawrap_30_20_bin.139	-	1960855	0.527	1919	30573	93.4	0.635	d__Bacteria;p__Firmicutes_D;c__Dethiobacteria;o__DTU022;f__UBA8154;g__CSSED11-109;s__CSSED11-109 sp003563385	0.003334	0.003776	5.83148	1.74262	0.005136
DK24SA4_metawrap_30_20_bin.133	-	1239299	0.523	1415	4463	64.73	8.05	d__Bacteria;p__Firmicutes_D;c__Dethiobacteria;o__DTU022;f__UBA8154;g__CSSED11-109;s__CSSED11-109 sp003563385	0	0	0.181046	2.31975	0
DK15SA4_metawrap_30_20_bin.113	-	1463328	0.55	1353	33350	62.07	1.694	d__Bacteria;p__Firmicutes_D;c__Dethiobacteria;o__DTU022;f__UBA8154;g__CSSED11-181;s__CSSED11-181 sp003563895	0.002864	0.059158	3.4739	1.39665	0.058979
DK3SA4_metawrap_30_20_bin.66	-	776360	0.437	821	9921	47.41	0	d__Bacteria;p__Firmicutes_D;c__Dethiobacteria;o__DTU022;f__UBA8154;g__SLJK01;s__SLJK01 sp007135125	0.191355	0.748591	2.20273	2.18128	1.05849
DK3SA4_metawrap_30_20_bin.152	-	1135673	0.478	1137	9761	33.98	0	d__Bacteria;p__Firmicutes_D;c__Dethiobacteria;o__DTU022;f__UBA8154;g__SLJK01;s__SLJK01 sp007135125	0.23493	0.835114	2.63898	2.76712	1.38767
DK1SA4_metawrap_30_20_bin.34	-	2409914	0.54	2569	11443	94.91	3.46	d__Bacteria;p__Firmicutes_D;c__Dethiobacteria;o__PWVN01;f__PWVN01;g__PWVN01;s__PWVN01 sp003567935	3.04038	0.335945	0.120039	7.09716	0
DKSSA4_metawrap_30_20_bin.153	-	1914663	0.439	1967	32236	93.85	4.237	d__Bacteria;p__Firmicutes_D;c__Dethiobacteria;o__SKNC01;f__SKNC01;g__SKLX01;s__SKLX01 sp007121375	0.0238355	0.417709	3.46741	0.672193	3.33543
DK1SA4_metawrap_30_20_bin.9	-	1655621	0.434	1751	16128	88.77	3.813	d__Bacteria;p__Firmicutes_D;c__Dethiobacteria;o__SKNC01;f__SKNC01;g__SKNC01;s__SKNC01 sp003560915	3.12646	0.4796	0.049252	0.012851	0.002638
DK1SA4_metawrap_30_20_bin.173	-	953552	0.432	1334	1449	34.59	3.238	d__Bacteria;p__Firmicutes_A;c__Clostridia;o__Peptostreptococcales;f__T1SED10-28;g__T1SED10-28;s__T1SED10-28 sp007134725	1.30688	0.639804	0.065173	0.092448	0
DK3SA4_metawrap_30_20_bin.125	-	2602469	0.437	2717	23253	93.7	0.699	d__Bacteria;p__Firmicutes_A;c__Clostridia;o__Peptostreptococcales;f__T1SED10-28;g__T1SED10-28;s__T1SED10-28 sp003554105	0.443987	6.1733	0.278135	0.067641	0.364962
DKSSA4_metawrap_30_20_bin.201	-	1845230	0.46	1847	9880	81.2	1.535	d__Bacteria;p__Firmicutes_F;c__Halanaerobiia;o__Halanaerobiales;f__Halarsenatibacteraceae;g__T1SED10-84;s__T1SED10-84 sp003554685	0	0.198244	13.6074	0.641372	5.74027
DKSSA4_metawrap_30_20_bin.40	-	534165	0.467	550	5643	40.51	1.724	d__Bacteria;p__Firmicutes_F;c__Halanaerobiia;o__Halanaerobiales;f__Halarsenatibacteraceae;g__T1SED10-84;s__T1SED10-84 sp007134885	0	0.295472	5.83477	0.555272	1.41817
DK15SA4_metawrap_30_20_bin.151	-	610095	0.429	626	6975	30.48	1.724	d__Bacteria;p__Firmicutes_F;c__Halanaerobiia;o__Halanaerobiales;f__Halarsenatibacteraceae;g__T1SED10-84;s__T1SED10-84 sp007134885	0.008581	0.44793	8.75392	0.661654	1.56422
DK3SA4_metawrap_30_20_bin.36	-	2462309	0.357	2558	13555	97.8	2.85	d__Bacteria;p__Firmicutes_F;c__Halanaerobiia;o__Halanaerobiales;f__Halarsenatibacteraceae;g__SLSL01;s__SLSL01 sp007130465	0.114627	1.78134	2.20484	0.029697	7.62691
DK15SA4_metawrap_30_20_bin.117	-	2473691	0.397	2327	11635	92.92	1.565	d__Bacteria;p__Firmicutes_F;c__Halanaerobiia;o__Halanaerobiales;f__CSSED10-376;g__T1SED10-99;s__T1SED10-99 sp003553225	0	0.107665	2.20506	0.32034	2.15717
DKSSA4_metawrap_30_20_bin.55	-	909486	0.454	1155	2690	40.95	1.129	d__Bacteria;p__Firmicutes_F;c__Halanaerobiia;o__B1SED10-174;f__B1SED10-174;g__T1SED10-26;s__T1SED10-26 sp003554585	0	0.295855	1.47958	0.179537	0.854373
DK24SA4_metawrap_30_20_bin.51	-	2351054	0.439	2715	5137	73.47	4.731	d__Bacteria;p__Firmicutes_F;c__Halanaerobiia;o__B1SED10-174;f__B1SED10-174;g__T1SED10-26;s__T1SED10-26 sp007122335	0.933937	8.97661	2.29761	4.62224	0.071343
DK1SA4_metawrap_30_20_bin.105	-	2473360	0.444	2608	15589	91.56	1.765	d__Bacteria;p__Firmicutes_F;c__Halanaerobiia;o__B1SED10-174;f__B1SED10-174;g__T1SED10-26;s__T1SED10-26 sp007122335	37.7748	28.7679	6.84105	1.58384	0.03445
DK24SA4_metawrap_30_20_bin.55	-	1490428	0.45	1710	4474	49.48	1.724	d__Bacteria;p__SLNR01;c__SLNR01;o__SLNR01;f__SLNR01;g__SLNR01;s__SLNR01 sp007132905	0.103257	0.076706	0.510279	2.30595	0.258
DK1SA4_metawrap_30_20_bin.72	-	3152292	0.584	3114	15112	85.14	1.485	d__Bacteria;p__Firmicutes_E;c__SLMV01;o__SLMV01;f__SLMV01;g__PWUC01;s__PWUC01 sp003566675	2.4743	0.827669	0.026799	0.343898	0
DK15SA4_metawrap_30_20_bin.155	-	1419981	0.537	1545	5879	58.07	0.49	d__Bacteria;p__Firmicutes_E;c__SLMV01;o__SLMV01;f__SLMV01;g__SLMV01;s__SLMV01 sp007133365	0.074307	0.107175	1.84361	0.343663	0.508122
DKSSA4_metawrap_30_20_bin.27	-	3244713	0.72	3251	10957	96.48	0	d__Bacteria;p__Actinobacteriota;c__Actinomycetia;o__Nitriliruptorales;f__Nitriliruptoraceae;g__T1Sed10-7;s__T1Sed10-7 sp003554005	0.100207	1.16009	0	0.00486	27.0732
DKSSA4_metawrap_30_20_bin.149	-	3166987	0.746	3120	17729	97.43	0.854	d__Bacteria;p__Actinobacteriota;c__Actinomycetia;o__Euzebyales;f__Egibacteraceae;g__T1Sed10-49;s__T1Sed10-49 sp003553795	0.74544	0.427867	0	0	2.72658
DKSSA4_metawrap_30_20_bin.173	-	2531069	0.741	2544	9348	95.63	2.849	d__Bacteria;p__Actinobacteriota;c__Actinomycetia;o__Euzebyales;f__Egibacteraceae;g__PUKE01;s__PUKE01 sp003553565	0.061174	0.088976	0	0	20.9881
DK1SA4_metawrap_30_20_bin.18	-	1380047	0.642	1657	5010	77.08	2.93	d__Bacteria;p__Actinobacteriota;c__Coriobacteriia;o__OPB41;f__SLCP01;g__SKKZ01;s__SKKZ01 sp007123455	3.42307	0.362526	0	0	0
DK1SA4_metawrap_30_20_bin.50	-	3780046	0.705	3651	15441	80.64	2.966	d__Bacteria;p__Deinococcota;c__Deinococci;o__Deinococcales;f__Trueperaceae;g__CSSed10-48;s__CSSed10-48 sp007121175	2.50093	1.17349	0	0	0.001694
DK24SA4_metawrap_30_20_bin.144	-	990307	0.48	874	36011	37.93	0	d__Bacteria;p__Chloroflexota;c__Anaerolineae;o__Anaerolineales;f__Anaerolineaceae;g__Brevefilum;s__Brevefilum sp003563055	0.302925	0.068373	0.108461	13.528	0.001901
DK3SA4_metawrap_30_20_bin.91	-	1649299	0.496	1617	10015	57.44	3.981	d__Bacteria;p__Chloroflexota;c__Anaerolineae;o__Anaerolineales;f__Anaerolineaceae;g__Brevefilum;s__Brevefilum sp007119455	0.1183	1.31628	0.455207	20.4032	0
DK24SA4_metawrap_30_20_bin.49	-	4456447	0.592	4711	4649	73.73	3.312	d__Bacteria;p__Chloroflexota;c__Anaerolineae;o__B4-G1;f__SLSP01;g__PWVB01;s__PWVB01 sp007125545	0.603784	0.279889	0.215304	2.15517	0
DK1SA4_metawrap_30_20_bin.22	-	3470918	0.62	3130	22794	98.62	3.294	d__Bacteria;p__Chloroflexota;c__Anaerolineae;o__UBA1429;f__UBA1429;g__UBA1429;s__UBA1429 sp007132185	1.46888	0.338996	0.223207	1.23131	0
DK15SA4_metawrap_30_20_bin.156	-	1908056	0.559	2118	7409	73.28	2.97	d__Bacteria;p__Chloroflexota;c__Dehalococcoidia;o__GIF9;f__AB-539-J10;g__SKVJ01;s__SKVJ01 sp007129495	0.069418	0.390337	1.85692	0.781186	0
DK3SA4_metawrap_30_20_bin.118	-	2490720	0.669	3029	2956	39.65	13.79	d__Bacteria;p__Proteobacteria;c__Gammaproteobacteria;o__Pseudomonadales;f__Halomonadaceae;g__Halomonas;s__Halomonas sp003553625	0.040316	1.80174	0.148261	0	0.639776
DKSSA4_metawrap_30_20_bin.72	-	2544196	0.663	2856	4775	88.19	2.658	d__Bacteria;p__Proteobacteria;c__Gammaproteobacteria;o__Ectothiorhodospirales;f__Thioalkalivibrionaceae;g__Thioalkalivibrio_B;s__Thioalkalivibrio_B sp003563455	0.0414865	1.03214	0.048487	0.026881	99.4651
DK3SA4_metawrap_30_20_bin.189	-	2375040	0.657	2593	5270	77.57	3.778	d__Bacteria;p__Proteobacteria;c__Gammaproteobacteria;o__Ectothiorhodospirales;f__Thioalkalivibrionaceae;g__Thioalkalivibrio_B;s__Thioalkalivibrio_B sp003553165	0.061881	22.8531	0	0.01757	0.126432
DK3SA4_metawrap_30_20_bin.16	-	2542753	0.656	2583	14015	84.24	1.264	d__Bacteria;p__Proteobacteria;c__Gammaproteobacteria;o__Ectothiorhodospirales;f__Thioalkalivibrionaceae;g__Thioalkalivibrio_B;s__Thioalkalivibrio_B sp007116035	0.560985	58.4804	0.005093	0.024576	0.786131
DK3SA4_metawrap_30_20_bin.39	-	2673523	0.607	2654	11854	94.38	2.024	d__Bacteria;p__Proteobacteria;c__Gammaproteobacteria;o__Thiohalomonadales;f__Thiohalomonadaceae;g__SLDE01;s__SLDE01 sp007125455	0.033958	2.58778	0.010327	0	0.003894
DK3SA4_metawrap_30_20_bin.143	-	1988464	0.639	2347	2552	48.4	1.724	d__Bacteria;p__Proteobacteria;c__Gammaproteobacteria;o__Xanthomonadales;f__Wenzhouxiangellaceae;g__Wenzhouxiangella;s__Wenzhouxiangella sp007123055	0.072789	1.63608	0	0	0.010143
DK1SA4_metawrap_30_20_bin.17	-	2797085	0.639	2676	11289	62.93	1.724	d__Bacteria;p__Proteobacteria;c__Gammaproteobacteria;o__Xanthomonadales;f__Wenzhouxiangellaceae;g__Wenzhouxiangella;s__Wenzhouxiangella sp007135935	2.72665	0.708831	0.005296	0	0.02907
DKSSA4_metawrap_30_20_bin.148	-	3485676	0.599	3953	5740	90.74	12.5	d__Bacteria;p__Proteobacteria;c__Alphaproteobacteria;o__Rhodobacterales;f__Rhodobacteraceae;g__Roseinatronobacter;s__Roseinatronobacter monicus	0.00839	0.783824	0.260089	0.044933	2.1571
DKSSA4_metawrap_30_20_bin.45	-	3345368	0.688	3634	10645	52.97	18.02	d__Bacteria;p__Proteobacteria;c__Alphaproteobacteria;o__Rhodobacterales;f__Rhodobacteraceae;g__WD3A24;s__WD3A24 sp007131685	0.091013	0.167429	0.00632	0	5.31456
DK3SA4_metawrap_30_20_bin.79	-	3445100	0.712	3633	10528	92.4	3.4	d__Bacteria;p__Proteobacteria;c__Alphaproteobacteria;o__Rhodobacterales;f__Rhodobacteraceae;g__SKOX01;s__SKOX01 sp007119835	5.10083	2.55373	0.00416	0	0.17628
DK24SA4_metawrap_30_20_bin.31	-	2468495	0.599	2509	4941	64.93	3.87	d__Bacteria;p__Myxococcota;c__Myxococcia;o__SLRQ01;f__SLRQ01;g__SLRQ01;s__SLRQ01 sp007130885	0.029548	0.343793	0.4742	2.4424	0.0347025
DK1SA4_metawrap_30_20_bin.108	-	2774494	0.538	2553	9234	84.35	1.313	d__Bacteria;p__Desulfobacterota;c__Desulfobacteria;o__Desulfobacterales;f__SURF-3;g__B1SED10-16;s__B1SED10-16 sp007136525	9.49188	0.317666	0.00208	0.645827	0
DK3SA4_metawrap_30_20_bin.62	-	2498174	0.552	2372	8150	77.31	2.473	d__Bacteria;p__Desulfobacterota;c__Desulfobacteria;o__Desulfobacterales;f__SURF-3;g__B1SED10-16;s__B1SED10-16 sp007131845	1.09299	1.705	0.273205	0	0.535377
DK3SA4_metawrap_30_20_bin.184	-	4387873	0.443	4189	23960	98.7	2.15	d__Bacteria;p__Desulfobacterota;c__Desulfobacteria;o__Desulfobacterales;f__SKZT01;g__SKZT01;s__SKZT01 sp007127235	4.13011	2.26031	0.184667	0.080902	0
DK1SA4_metawrap_30_20_bin.45	-	2456056	0.599	2225	14829	94.8	1.934	d__Bacteria;p__Desulfobacterota;c__Desulfobulbia;o__Desulfobulbales;f__Desulfurivibrionaceae;g__Desulfurivibrio;s__Desulfurivibrio sp003557565	2.36093	0.430868	7.56133	0	0.093472
DK15SA4_metawrap_30_20_bin.89	-	2317409	0.533	2215	19975	98.21	0.595	d__Bacteria;p__Desulfobacterota;c__Desulfovibrionia;o__Desulfovibrionales;f__Desulfonatronovibrionaceae;g__Desulfonatronospira;s__Desulfonatronospira sp003554505	0	0.73674	6.67001	2.32946	13.7485
DK3SA4_metawrap_30_20_bin.69	-	1603442	0.527	1573	14570	74.22	4.251	d__Bacteria;p__Desulfobacterota;c__Desulfovibrionia;o__Desulfovibrionales;f__Desulfonatronovibrionaceae;g__Desulfonatronospira;s__Desulfonatronospira sp003553695	0.094768	3.06522	0.377163	0.095829	0.18915
DK24SA4_metawrap_30_20_bin.2	-	2781135	0.489	2755	56165	98.8	2.38	d__Bacteria;p__Desulfobacterota;c__Desulfovibrionia;o__Desulfovibrionales;f__Desulfonatronovibrionaceae;g__Desulfonatronospira;s__Desulfonatronospira sp007125075	0.376624	0.295362	1.62886	6.33706	1.5e-06
DK1SA4_metawrap_30_20_bin.169	-	4131093	0.605	3833	5335	74.66	1.198	d__Bacteria;p__Hydrogenedentota;c__Hydrogenedentia;o__Hydrogenedentiales;f__UBA2224;g__UBA2224;s__UBA2224 sp007130675	1.36782	0.822568	0	0.117382	0
DK3SA4_metawrap_30_20_bin.131	-	2698423	0.601	2468	6207	59.63	1.123	d__Bacteria;p__Hydrogenedentota;c__Hydrogenedentia;o__Hydrogenedentiales;f__UBA2224;g__UBA2224;s__UBA2224 sp007130675	0.715104	1.38517	0.00733	0.130351	0
DK3SA4_metawrap_30_20_bin.178	-	2204878	0.583	2807	1628	38.91	4.504	d__Bacteria;p__Hydrogenedentota;c__Hydrogenedentia;o__Hydrogenedentiales;f__UBA2224;g__PWNM01;s__PWNM01 sp003557825	0.481409	1.47185	0.368622	0.0648475	0
DK1SA4_metawrap_30_20_bin.163	-	4098867	0.486	3442	17373	91.66	2.063	d__Bacteria;p__Bacteroidota;c__Bacteroidia;o__Bacteroidales;f__PUMT01;g__PXAP01;s__PXAP01 sp007119075	5.29028	0.791537	0.108864	0.681444	0
DK1SA4_metawrap_30_20_bin.116	-	2418489	0.488	2247	5785	66.97	3.225	d__Bacteria;p__Bacteroidota;c__Bacteroidia;o__Bacteroidales;f__PUMT01;g__PXAP01;s__PXAP01 sp007132715	1.34465	0.364064	0.349915	0.626923	0
DK1SA4_metawrap_30_20_bin.29	-	1509054	0.425	1379	12753	75.03	1.428	d__Bacteria;p__Bacteroidota;c__Bacteroidia;o__Bacteroidales;f__PUMT01;g__PUMT01;s__PUMT01 sp007125955	1.96055	1.80507	0.70465	0.087982	0.019214
DK24SA4_metawrap_30_20_bin.44	-	2268219	0.477	2045	28813	92.74	0.806	d__Bacteria;p__Bacteroidota;c__Bacteroidia;o__Bacteroidales;f__UBA7960;g__PUPG01;s__PUPG01 sp003567205	2.22909	0.179308	2.58776	89.013	0.014218
DK3SA4_metawrap_30_20_bin.163	-	2692527	0.465	2569	6042	74.71	10.39	d__Bacteria;p__Bacteroidota;c__Bacteroidia;o__Bacteroidales;f__UBA7960;g__PUPG01;s__PUPG01 sp007134525	0.421061	1.50985	1.36971	0.294461	0
DKSSA4_metawrap_30_20_bin.79	-	2840959	0.48	2492	13294	94.17	0.537	d__Bacteria;p__Bacteroidota;c__Bacteroidia;o__Bacteroidales;f__UBA7960;g__PUPG01;s__PUPG01 sp007124575	0.021561	2.63148	4.67884	0.017607	8.61399
DKSSA4_metawrap_30_20_bin.58	-	1154095	0.494	1084	6635	39.96	1.724	d__Bacteria;p__Bacteroidota;c__Bacteroidia;o__Bacteroidales;f__UBA7960;g__PYGY01;s__PYGY01 sp003560215	0	0.324058	0.580795	0	1.95605
DK3SA4_metawrap_30_20_bin.176	-	2541842	0.496	2181	15056	84.64	2.571	d__Bacteria;p__Bacteroidota;c__Bacteroidia;o__Bacteroidales;f__UBA7960;g__PYGY01;s__PYGY01 sp007129945	0.129375	3.34654	1.34144	0.013403	2.3211
DK3SA4_metawrap_30_20_bin.37	-	2080565	0.54	1696	64094	79.74	0	d__Bacteria;p__Bacteroidota;c__Bacteroidia;o__Bacteroidales;f__UBA7960;g__PWJC01;s__PWJC01 sp003560165	0.608302	6.07334	0.328991	0.860207	0
DK24SA4_metawrap_30_20_bin.10	-	2208864	0.456	2015	53812	50.86	3.448	d__Bacteria;p__Bacteroidota;c__Bacteroidia;o__Bacteroidales;f__UBA7960;g__SKRM01;s__SKRM01 sp007118495	0.026545	0.031748	0.021047	9.49509	0.003825
DK24SA4_metawrap_30_20_bin.58	-	1017661	0.439	906	57214	41.41	0	d__Bacteria;p__Bacteroidota;c__Bacteroidia;o__Bacteroidales;f__UBA7960;g__SKRM01;s__SKRM01 sp007118495	0.024521	0.028569	0.017934	8.0312	0.004678
DK3SA4_metawrap_30_20_bin.107	-	3170149	0.457	2617	38531	93.54	2.688	d__Bacteria;p__Bacteroidota;c__Bacteroidia;o__Bacteroidales;f__UBA7960;g__PUML01;s__PUML01 sp007129255	0.549915	4.92064	0.806453	0	0.29226
DK3SA4_metawrap_30_20_bin.151	-	2625257	0.384	2112	49794	90.32	1.612	d__Bacteria;p__Bacteroidota;c__Bacteroidia;o__Bacteroidales;f__UBA7960;g__PUKZ01;s__PUKZ01 sp003559855	0.009769	4.25343	0.27747	0.031827	0.011889
DKSSA4_metawrap_30_20_bin.156	-	1637613	0.337	2102	2195	34.79	8.62	d__Bacteria;p__Bacteroidota;c__Bacteroidia;o__Bacteroidales;f__UBA7960;g__PUKZ01;s__PUKZ01 sp003550725	0	0.0221755	0.282308	0	1.77466
DK3SA4_metawrap_30_20_bin.161	-	3403023	0.451	3080	14029	96.44	2.483	d__Bacteria;p__Bacteroidota;c__Rhodothermia;o__Balneolales;f__Balneolaceae;g__QGGB01;s__QGGB01 sp007118525	0.147695	2.54743	0.084109	0.03218	0.248636
DKSSA4_metawrap_30_20_bin.112	-	3700349	0.541	3269	13170	96.72	1.639	d__Bacteria;p__Bacteroidota;c__Rhodothermia;o__Balneolales;f__SKNL01;g__SKNL01;s__SKNL01 sp007120555	6.91869	10.5078	14.3639	3.19419	3.24667
DK1SA4_metawrap_30_20_bin.69	-	2838179	0.565	2555	9424	79.61	3.551	d__Bacteria;p__Bacteroidota;c__Rhodothermia;o__Balneolales;f__SKNL01;g__SKNL01;s__SKNL01 sp007128855	2.79496	0.216295	0.078174	0.179099	0.0062385
DK15SA4_metawrap_30_20_bin.66	-	3339426	0.513	2901	15480	73.49	13.11	d__Bacteria;p__Bacteroidota;c__Rhodothermia;o__Balneolales;f__SKNL01;g__SLLW01;s__SLLW01 sp007132495	0.162523	0.576902	3.73243	0.098128	0.165957
DKSSA4_metawrap_30_20_bin.53	-	3117227	0.628	2824	17322	88.98	0	d__Bacteria;p__Bacteroidota;c__Rhodothermia;o__Rhodothermales;f__Salinibacteraceae;g__Tc-Br11-B2g6-7;s__Tc-Br11-B2g6-7 sp001564055	0	0.003431	0.658753	0	3.10976
DK24SA4_metawrap_30_20_bin.98	-	3774676	0.446	3719	8455	78.89	1.912	d__Bacteria;p__Bacteroidota;c__UBA10030;o__T3Sed10-11;f__T3Sed10-11;g__T3Sed10-11;s__T3Sed10-11 sp003567775	0.427499	0.247337	0.581005	2.04498	0
DK3SA4_metawrap_30_20_bin.177	-	3943517	0.439	3682	27804	96.15	1.657	d__Bacteria;p__Bacteroidota;c__UBA10030;o__T3Sed10-11;f__T3Sed10-11;g__T3Sed10-11;s__T3Sed10-11 sp003568415	2.67526	2.69852	1.11778	6.77827	0
DK1SA4_metawrap_30_20_bin.85	-	1087599	0.654	1155	5147	38.55	0	d__Bacteria;p__Gemmatimonadota;c__Gemmatimonadetes;o__SG8-23;f__UBA6960;g__PXFI01;s__PXFI01 sp003564295	11.8606	0.949771	0	2.05654	0
DK1SA4_metawrap_30_20_bin.86	-	1235351	0.656	1292	5297	44.31	2.747	d__Bacteria;p__Gemmatimonadota;c__Gemmatimonadetes;o__SG8-23;f__UBA6960;g__PXFI01;s__PXFI01 sp007121435	9.70751	1.29083	0	2.82017	0
DK3SA4_metawrap_30_20_bin.14	-	4041809	0.656	3961	9511	89.61	7.856	d__Bacteria;p__Gemmatimonadota;c__Gemmatimonadetes;o__SG8-23;f__UBA6960;g__PXFI01;s__PXFI01 sp007121435	9.90759	1.91501	0	3.08725	0
DK3SA4_metawrap_30_20_bin.15	-	3334173	0.68	3112	9749	85.16	3.846	d__Bacteria;p__Gemmatimonadota;c__Gemmatimonadetes;o__SG8-23;f__UBA6960;g__T3Sed10-66;s__T3Sed10-66 sp003556585	0.819396	2.89197	0	0	0.010189
DK1SA4_metawrap_30_20_bin.33	-	3839056	0.686	3341	48419	96.7	4.395	d__Bacteria;p__Gemmatimonadota;c__Gemmatimonadetes;o__SG8-23;f__RSA9;g__SLCC01;s__SLCC01 sp007126035	8.43991	3.06163	0.01978	0.919962	0.000569
DK3SA4_metawrap_30_20_bin.142	-	2263168	0.617	2803	1413	39.81	2.352	d__Bacteria;p__Planctomycetota;c__Planctomycetes;o__Pirellulales;f__Pirellulaceae;g__UBA6163;s__UBA6163 sp007127095	0.390705	1.4748	0	0	0.092236
DK15SA4_metawrap_30_20_bin.48	-	1312368	0.421	1417	4990	59.15	2.542	d__Bacteria;p__CG03;c__SLGR01;o__SLGR01;f__SLGR01;g__PWEK01;s__PWEK01 sp003553445	0	0.05241	2.05202	0	0.410962
DK15SA4_metawrap_30_20_bin.45	-	406576	0.394	459	13172	44.82	1.724	d__Bacteria;p__Patescibacteria;c__Paceibacteria;o__Paceibacterales;f__PWPS01;g__PWPS01;s__PWPS01 sp003554915	0	0.03765	3.49058	0	0.733448
DK3SA4_metawrap_30_20_bin.123	-	712018	0.452	915	2725	56.89	4.212	d__Bacteria;p__Patescibacteria;c__Saccharimonadia;o__Saccharimonadales;f__SLHW01;g__SLHW01;s__SLHW01 sp007135955	0.659954	1.27057	0	0	0
DK24SA4_metawrap_30_20_bin.60	-	829433	0.427	879	6558	65.01	1.32	d__Bacteria;p__Patescibacteria;c__Gracilibacteria;o__UBA1369;f__LOWO2-01-FULL-3;g__SLNK01;s__SLNK01 sp007133095	0.60234	0.077482	0	2.38467	0
DK1SA4_metawrap_30_20_bin.135	-	598613	0.426	796	2039	41.48	13.48	d__Bacteria;p__Patescibacteria;c__Gracilibacteria;o__UBA1369;f__LOWO2-01-FULL-3;g__SLNK01;s__SLNK01 sp007133095	1.24854	0.130595	0	0.137384	0
DKSSA4_metawrap_30_20_bin.60	-	688537	0.335	727	13797	76.56	0	d__Bacteria;p__Patescibacteria;c__Dojkabacteria;o__SC72;f__T1SED10-24;g__T1SED10-24;s__T1SED10-24 sp003554185	0.005051	0.042904	0.516792	0.009453	2.41531
DK15SA4_metawrap_30_20_bin.109	-	6774092	0.395	9083	1680	39.57	7.228	d__Bacteria;p__Fusobacteriota;c__Fusobacteriia;o__;f__;g__;s__	0	0.114748	1.30719	0.073287	0.099884
DKSSA4_metawrap_30_20_bin.77	-	2937666	0.398	4146	1527	34.67	11.2	d__Bacteria;p__Fusobacteriota;c__Fusobacteriia;o__;f__;g__;s__	0	0.046288	0.290959	0.0574465	1.55787
DK24SA4_metawrap_30_20_bin.11	-	2528290	0.482	3776	1189	31.21	9.615	d__Bacteria;p__Fusobacteriota;c__;o__;f__;g__;s__	0.179426	0.0941435	0.105745	2.35585	0
DKSSA4_metawrap_30_20_bin.89	-	528133	0.5	535	11841	32.75	0	d__Bacteria;p__Firmicutes_D;c__Dethiobacteria;o__DTU022;f__DTU022;g__B1SED10-74M;s__	0.00963	0.036781	0.563284	0.132781	4.83757
DKSSA4_metawrap_30_20_bin.174	-	952802	0.509	1010	5505	32.69	10.58	d__Bacteria;p__Firmicutes_D;c__Dethiobacteria;o__DTU022;f__DTU022;g__B1SED10-74M;s__	0.020518	0.107627	0.59119	0.16023	1.88132
DK24SA4_metawrap_30_20_bin.34	-	1426820	0.502	1375	20496	65.6	9.745	d__Bacteria;p__Firmicutes_D;c__Dethiobacteria;o__DTU022;f__DTU022;g__B1SED10-74M;s__	0.202577	0.372825	0.521971	5.04854	0.052394
DKSSA4_metawrap_30_20_bin.200	-	1379870	0.492	1367	7525	31.66	13.47	d__Bacteria;p__Firmicutes_D;c__Dethiobacteria;o__DTU022;f__DTU022;g__B1SED10-74M;s__	0.028401	0.172159	0.813353	0.363044	4.32658
DK3SA4_metawrap_30_20_bin.175	-	2417586	0.442	2443	6585	57.06	0	d__Bacteria;p__Firmicutes_D;c__Dethiobacteria;o__DTU022;f__DTU022;g__B1SED10-74M;s__	0.542088	1.33054	0.157514	0.838701	0.199952
DK15SA4_metawrap_30_20_bin.60	-	1851548	0.493	2144	4246	47.96	2.461	d__Bacteria;p__Firmicutes_D;c__Dethiobacteria;o__DTU022;f__DTU022;g__B1SED10-74M;s__	0.109729	0.193379	22.7182	3.89544	0.128793
DKSSA4_metawrap_30_20_bin.42	-	1214230	0.476	1401	4703	35.43	7.909	d__Bacteria;p__Firmicutes_D;c__Dethiobacteria;o__DTU022;f__DTU022;g__B1SED10-74M;s__	0.023993	0.160404	0.537738	0.413062	1.65553
DKSSA4_metawrap_30_20_bin.161	-	1158509	0.508	1156	8084	37.06	7.758	d__Bacteria;p__Firmicutes_D;c__Dethiobacteria;o__DTU022;f__DTU022;g__B1SED10-74M;s__	0.033447	0.209889	0.530241	0.655489	2.22085
DK15SA4_metawrap_30_20_bin.91	-	751585	0.44	763	10414	37.46	5.508	d__Bacteria;p__Firmicutes_D;c__Dethiobacteria;o__DTU022;f__DTU022;g__B1SED10-74M;s__	0.951841	1.94883	3.43733	4.36999	0.129207
DK24SA4_metawrap_30_20_bin.12	-	539003	0.449	557	12141	35.34	8.107	d__Bacteria;p__Firmicutes_D;c__Dethiobacteria;o__DTU022;f__DTU022;g__B1SED10-74M;s__	0.930651	2.21409	3.0017	5.37091	0.091712
DK3SA4_metawrap_30_20_bin.128	-	1295057	0.458	1321	7871	51	5.112	d__Bacteria;p__Firmicutes_D;c__Dethiobacteria;o__DTU022;f__DTU022;g__B1SED10-74M;s__	3.78239	5.38729	2.22177	2.83912	0.132112
DK3SA4_metawrap_30_20_bin.50	-	1187102	0.425	1266	8378	43.34	6.779	d__Bacteria;p__Firmicutes_D;c__Dethiobacteria;o__DTU022;f__DTU022;g__B1SED10-74M;s__	0.887584	2.2403	1.08775	1.35141	0.027866
DK24SA4_metawrap_30_20_bin.54	-	847672	0.448	861	10984	35.34	14.13	d__Bacteria;p__Firmicutes_D;c__Dethiobacteria;o__DTU022;f__DTU022;g__B1SED10-74M;s__	1.95243	1.17543	1.53412	6.03605	0.146925
DK24SA4_metawrap_30_20_bin.40	-	1449745	0.446	1452	10330	38.79	6.034	d__Bacteria;p__Firmicutes_D;c__Dethiobacteria;o__DTU022;f__DTU022;g__B1SED10-74M;s__	0.614686	1.48856	1.20072	3.50103	0.17789
DK24SA4_metawrap_30_20_bin.39	-	1184153	0.447	1179	17854	31.57	7.017	d__Bacteria;p__Firmicutes_D;c__Dethiobacteria;o__DTU022;f__DTU022;g__B1SED10-74M;s__	1.04001	1.06486	1.38763	8.09283	1.5038
DK24SA4_metawrap_30_20_bin.43	-	1261494	0.465	1348	9345	48.61	11	d__Bacteria;p__Firmicutes_D;c__Dethiobacteria;o__DTU022;f__DTU022;g__B1SED10-74M;s__	0.950747	0.974866	1.28181	7.90441	0.999418
DK24SA4_metawrap_30_20_bin.99	-	1261706	0.449	1222	13749	51.2	19.82	d__Bacteria;p__Firmicutes_D;c__Dethiobacteria;o__DTU022;f__DTU022;g__B1SED10-74M;s__	0.106848	0.347475	0.911919	2.87312	0.510873
DK15SA4_metawrap_30_20_bin.76	-	626510	0.446	686	5601	40.11	13.79	d__Bacteria;p__Firmicutes_D;c__Dethiobacteria;o__DTU022;f__DTU022;g__B1SED10-74M;s__	0.038408	0.092126	1.27852	0.319006	1.33557
DK15SA4_metawrap_30_20_bin.162	-	925229	0.457	1076	3755	30.17	10.34	d__Bacteria;p__Firmicutes_D;c__Dethiobacteria;o__DTU022;f__DTU022;g__B1SED10-74M;s__	0.082756	0.147404	1.08406	0.53422	0.624409
DKSSA4_metawrap_30_20_bin.133	-	1123732	0.425	1196	9931	31.03	5.172	d__Bacteria;p__Firmicutes_D;c__Dethiobacteria;o__DTU022;f__DTU022;g__B1SED10-74M;s__	0.013329	0.076819	1.01501	0.120622	7.37331
DKSSA4_metawrap_30_20_bin.130	-	969792	0.49	949	9741	52.59	0.847	d__Bacteria;p__Firmicutes_D;c__Dethiobacteria;o__DTU022;f__DTU022;g__B1SED10-74M;s__	0.00702	0.013438	0.59365	0.065161	16.823
DK3SA4_metawrap_30_20_bin.11	-	1005970	0.472	1378	1605	34.97	6.896	d__Bacteria;p__Firmicutes_D;c__Dethiobacteria;o__DTU022;f__DTU022;g__;s__	0.583147	1.01678	0	0.130085	0
DK1SA4_metawrap_30_20_bin.1	-	875068	0.476	948	5883	34.48	4.31	d__Bacteria;p__Firmicutes_D;c__Dethiobacteria;o__DTU022;f__DTU022;g__T3SED10-7;s__	1.60407	0.644605	0	0.102695	0
DKSSA4_metawrap_30_20_bin.34	-	1007236	0.46	1011	9044	45	0	d__Bacteria;p__Firmicutes_D;c__Dethiobacteria;o__DTU022;f__DTU022;g__T3SED10-7;s__	0.081559	0.292588	1.79235	3.21504	1.16353
DKSSA4_metawrap_30_20_bin.46	-	872586	0.481	895	7577	31.78	8.62	d__Bacteria;p__Firmicutes_D;c__Dethiobacteria;o__DTU022;f__DTU022;g__T3SED10-7;s__	0.037734	0.222471	0.562734	0.711148	1.81663
DK24SA4_metawrap_30_20_bin.37	-	1505370	0.533	1434	21112	56.61	16.66	d__Bacteria;p__Firmicutes_D;c__Dethiobacteria;o__DTU022;f__DTU022;g__T3SED10-7;s__	2.75129	1.82468	0.119713	4.53045	0.042986
DK1SA4_metawrap_30_20_bin.158	-	1697629	0.503	1618	28114	42.13	16.87	d__Bacteria;p__Firmicutes_D;c__Dethiobacteria;o__DTU022;f__DTU022;g__T3SED10-7;s__	3.90541	2.22447	0.13361	1.9823	0.038753
DK3SA4_metawrap_30_20_bin.46	-	994284	0.459	1001	8517	31.89	0	d__Bacteria;p__Firmicutes_D;c__Dethiobacteria;o__DTU022;f__DTU022;g__T3SED10-7;s__	0.988915	1.77771	0.541026	1.87608	0.278221
DK24SA4_metawrap_30_20_bin.134	-	778377	0.476	767	9687	38.27	12.06	d__Bacteria;p__Firmicutes_D;c__Dethiobacteria;o__DTU022;f__DTU022;g__T3SED10-7;s__	1.05508	1.09417	0.961633	2.42375	0.424846
DK3SA4_metawrap_30_20_bin.137	-	1387610	0.461	1420	7438	51.03	10.68	d__Bacteria;p__Firmicutes_D;c__Dethiobacteria;o__DTU022;f__DTU022;g__T3SED10-7;s__	1.08245	1.80686	1.30434	4.41786	1.99988
DK1SA4_metawrap_30_20_bin.172	-	836284	0.468	825	7576	36.58	11.08	d__Bacteria;p__Firmicutes_D;c__Dethiobacteria;o__DTU022;f__DTU022;g__T3SED10-7;s__	1.91986	1.30802	1.18893	5.3047	2.28062
DK1SA4_metawrap_30_20_bin.62	-	753080	0.476	754	6643	31.03	14.89	d__Bacteria;p__Firmicutes_D;c__Dethiobacteria;o__DTU022;f__DTU022;g__T3SED10-7;s__	3.23355	1.12531	0.541224	1.26585	0.136199
DK15SA4_metawrap_30_20_bin.7	-	1326330	0.44	1470	6902	31.92	7.627	d__Bacteria;p__Firmicutes_D;c__Dethiobacteria;o__DTU022;f__DTU022;g__T3SED10-7;s__	0.651947	0.86005	1.93829	1.80987	1.38033
DK24SA4_metawrap_30_20_bin.53	-	1657979	0.469	1906	3666	35.94	11.94	d__Bacteria;p__Firmicutes_D;c__Dethiobacteria;o__DTU022;f__DTU022;g__T3SED10-7;s__	0.59543	0.659371	0.779574	2.70687	0.267397
DKSSA4_metawrap_30_20_bin.197	-	2034343	0.473	2666	1894	42.75	6.034	d__Bacteria;p__Firmicutes_D;c__Dethiobacteria;o__DTU022;f__DTU022;g__T3SED10-7;s__	0.061929	0.178549	0.347831	0.395153	1.55609
DK15SA4_metawrap_30_20_bin.98	-	767737	0.471	903	3116	30.07	4.237	d__Bacteria;p__Firmicutes_D;c__Dethiobacteria;o__DTU022;f__DTU022;g__T3SED10-7;s__	0.292056	0.389067	1.5325	1.77352	0.451143
DK24SA4_metawrap_30_20_bin.125	-	2051231	0.471	2009	11930	53.79	18.78	d__Bacteria;p__Firmicutes_D;c__Dethiobacteria;o__DTU022;f__DTU022;g__T3SED10-7;s__	1.40177	0.971919	1.50338	10.9365	1.54736
DK15SA4_metawrap_30_20_bin.57	-	1574090	0.504	2246	1392	38.02	18	d__Bacteria;p__Firmicutes_D;c__Dethiobacteria;o__DTU022;f__DTU022;g__T3SED10-7;s__	0	0.058719	0.843311	0.138033	0.197104
DK1SA4_metawrap_30_20_bin.38	-	905737	0.476	941	5283	40.96	3.079	d__Bacteria;p__Firmicutes_D;c__Dethiobacteria;o__DTU022;f__DTU022;g__SKPH01;s__	13.5285	1.21951	0.498097	1.95724	0
DK1SA4_metawrap_30_20_bin.142	-	1200862	0.488	1515	1958	30.98	8.713	d__Bacteria;p__Firmicutes_D;c__Dethiobacteria;o__DTU022;f__DTU022;g__SKPH01;s__	2.39998	0.75499	0.133939	0.89885	0
DK24SA4_metawrap_30_20_bin.63	-	1201481	0.481	1153	30812	62.4	2.824	d__Bacteria;p__Firmicutes_D;c__Dethiobacteria;o__DTU022;f__DTU022;g__SKPH01;s__	0.091243	0.041928	0.506321	10.6269	0.007059
DK15SA4_metawrap_30_20_bin.35	-	2114515	0.442	2480	3732	31.58	6.497	d__Bacteria;p__Firmicutes_D;c__Dethiobacteria;o__DTU022;f__DTU022;g__;s__	0.036782	0.106237	1.03478	0.394538	0.277952
DK1SA4_metawrap_30_20_bin.28	-	1930319	0.474	2574	1707	32.84	7.471	d__Bacteria;p__Firmicutes_D;c__Dethiobacteria;o__DTU022;f__DTU022;g__;s__	1.56045	0.396159	0	0.053649	0
DK1SA4_metawrap_30_20_bin.185	-	858231	0.477	1083	2043	34.26	5.956	d__Bacteria;p__Firmicutes_D;c__Dethiobacteria;o__DTU022;f__DTU022;g__SLQM01;s__	7.76849	3.42269	0.05835	0.124379	0
DK3SA4_metawrap_30_20_bin.156	-	765752	0.444	817	8906	37.06	3.448	d__Bacteria;p__Firmicutes_D;c__Dethiobacteria;o__DTU022;f__DTU022;g__SLQM01;s__	8.15712	4.507	0.069359	0.062083	0
DK1SA4_metawrap_30_20_bin.98	-	554207	0.428	632	6158	34.48	6.896	d__Bacteria;p__Firmicutes_D;c__Dethiobacteria;o__DTU022;f__DTU022;g__SLQM01;s__	2.53719	0.864406	0.259001	0.986186	0.046305
DK1SA4_metawrap_30_20_bin.84	-	2448649	0.438	2575	7452	51.72	18.1	d__Bacteria;p__Firmicutes_D;c__Dethiobacteria;o__DTU022;f__DTU022;g__SLQM01;s__	3.61885	0.733121	0.022486	0.061623	0.006616
DK1SA4_metawrap_30_20_bin.182	-	2538449	0.431	3632	1699	32.75	8.62	d__Bacteria;p__Firmicutes_D;c__Dethiobacteria;o__DTU022;f__DTU022;g__;s__	1.4686	0.383796	0.037728	0.214098	0
DK1SA4_metawrap_30_20_bin.141	-	892463	0.463	1180	2172	39.82	16.37	d__Bacteria;p__Firmicutes_D;c__Dethiobacteria;o__DTU022;f__DTU022;g__;s__	1.55973	0.394303	0	0.077787	0
DK24SA4_metawrap_30_20_bin.130	-	1655210	0.483	1586	42014	52.75	2.259	d__Bacteria;p__Firmicutes_D;c__Dethiobacteria;o__DTU022;f__DTU022;g__;s__	0.472158	0.017243	0.011746	5.71005	0.005518
DK3SA4_metawrap_30_20_bin.122	-	1922648	0.451	1873	18440	85.8	0.847	d__Bacteria;p__Firmicutes_D;c__Dethiobacteria;o__DTU022;f__DTU022;g__;s__	4.83735	1.12581	0.036898	10.4977	0
DK3SA4_metawrap_30_20_bin.167	-	1636494	0.516	2126	1818	48.41	12.49	d__Bacteria;p__Firmicutes_D;c__Dethiobacteria;o__DTU022;f__DTU022;g__SLPH01;s__	0.606038	0.99544	0	0	0
DK1SA4_metawrap_30_20_bin.5	-	1632361	0.522	2084	1947	31.58	12.14	d__Bacteria;p__Firmicutes_D;c__Dethiobacteria;o__DTU022;f__DTU022;g__SLPH01;s__	1.52346	0.566124	0	0	0
DK1SA4_metawrap_30_20_bin.58	-	1159113	0.518	1188	6760	48.33	16.52	d__Bacteria;p__Firmicutes_D;c__Dethiobacteria;o__DTU022;f__DTU022;g__SLPH01;s__	1.64846	0.659501	0	0.017402	0
DK24SA4_metawrap_30_20_bin.6	-	782371	0.502	826	8711	32.91	17.16	d__Bacteria;p__Firmicutes_D;c__Dethiobacteria;o__DTU022;f__DTU022;g__;s__	0.254704	0.226369	0.548318	6.07169	0.024206
DK15SA4_metawrap_30_20_bin.160	-	1452545	0.462	2068	1533	38.21	15.51	d__Bacteria;p__Firmicutes_D;c__Dethiobacteria;o__DTU022;f__DTU022;g__;s__	0	0.049685	1.01238	0.141825	0.193854
DK3SA4_metawrap_30_20_bin.92	-	844457	0.586	1118	1476	35.39	8.05	d__Bacteria;p__Firmicutes_D;c__Dethiobacteria;o__DTU022;f__DTU022;g__;s__	0.340099	0.821389	0.197341	1.08351	0
DK24SA4_metawrap_30_20_bin.142	-	2817158	0.443	3263	5000	35.98	11.22	d__Bacteria;p__Firmicutes_D;c__Dethiobacteria;o__DTU022;f__DTU022;g__;s__	0.286423	0.168335	0.246033	3.30941	0.017131
DK24SA4_metawrap_30_20_bin.64	-	1044922	0.551	1034	15430	38.79	3.448	d__Bacteria;p__Firmicutes_D;c__Dethiobacteria;o__DTU022;f__DTU022;g__;s__	0.340176	0.020595	0.005559	3.70728	0
DK24SA4_metawrap_30_20_bin.102	-	1842058	0.58	2066	3688	33.48	8.05	d__Bacteria;p__Firmicutes_D;c__Dethiobacteria;o__DTU022;f__DTU022;g__;s__	0.438362	0.049545	0	2.71168	0
DK1SA4_metawrap_30_20_bin.146	-	1949624	0.532	1927	12078	82.83	0.635	d__Bacteria;p__Firmicutes_D;c__Dethiobacteria;o__DTU022;f__DTU022;g__;s__	1.57798	0.028394	0.005562	1.44514	0
DK1SA4_metawrap_30_20_bin.21	-	1875557	0.556	1902	10348	74.04	2.966	d__Bacteria;p__Firmicutes_D;c__Dethiobacteria;o__DTU022;f__DTU022;g__;s__	2.29293	0.140493	0.125567	9.90996	0
DK15SA4_metawrap_30_20_bin.112	-	1599820	0.527	2294	1420	42.19	14.1	d__Bacteria;p__Firmicutes_D;c__Dethiobacteria;o__DTU022;f__;g__;s__	0	0.051327	1.06686	0.15141	0.116696
DK24SA4_metawrap_30_20_bin.27	-	1537617	0.549	1761	2915	31.07	4.094	d__Bacteria;p__Firmicutes_D;c__Dethiobacteria;o__DTU022;f__;g__;s__	0.279117	0.063334	0.143869	2.96271	0
DKSSA4_metawrap_30_20_bin.198	-	2118905	0.423	1890	67051	93.32	3.107	d__Bacteria;p__Firmicutes_D;c__Dethiobacteria;o__DTU022;f__PWGO01;g__B1SED10-75;s__	0.007827	0.006137	0.946125	0.084197	27.8835
DKSSA4_metawrap_30_20_bin.10	-	1875773	0.419	1899	7557	61.01	5.395	d__Bacteria;p__Firmicutes_D;c__Dethiobacteria;o__DTU022;f__PWGO01;g__T1SED10-157;s__	0	0	0.10205	0.009957	2.58055
DK15SA4_metawrap_30_20_bin.23	-	1325488	0.447	1389	4882	34.48	0	d__Bacteria;p__Firmicutes_D;c__Dethiobacteria;o__DTU022;f__PWGO01;g__;s__	0	0.108162	1.9942	0.039856	0.524966
DK24SA4_metawrap_30_20_bin.16	-	1263559	0.487	1237	8384	38.1	0	d__Bacteria;p__Firmicutes_D;c__Dethiobacteria;o__DTU022;f__PWGO01;g__;s__	0.236938	0.140762	0.023288	3.32889	0
DKSSA4_metawrap_30_20_bin.177	-	1853994	0.49	1774	12319	79.84	2.754	d__Bacteria;p__Firmicutes_D;c__Dethiobacteria;o__DTU022;f__PWGO01;g__PWGO01;s__	0	0	0.178248	0.010274	2.84621
DK24SA4_metawrap_30_20_bin.140	-	2511403	0.508	2360	27182	87.38	2.824	d__Bacteria;p__Firmicutes_D;c__Dethiobacteria;o__DTU022;f__;g__;s__	0.73338	0.01184	0.015244	8.07856	0.002556
DKSSA4_metawrap_30_20_bin.107	-	1908447	0.493	2527	1638	37.82	8.275	d__Bacteria;p__Firmicutes_D;c__Dethiobacteria;o__DTU022;f__;g__;s__	0	0	0.246063	0.038832	1.80767
DK15SA4_metawrap_30_20_bin.11	-	5538761	0.436	6660	3043	45.13	9.867	d__Bacteria;p__Firmicutes_D;c__Dethiobacteria;o__DTU022;f__;g__;s__	0.011967	0.125459	2.07371	0.114757	0.197203
DK1SA4_metawrap_30_20_bin.150	-	644388	0.543	674	4958	37.93	0	d__Bacteria;p__Firmicutes_D;c__Dethiobacteria;o__DTU022;f__UBA8154;g__SKMY01;s__	4.3353	0.241738	0.106324	0.276855	0
DK1SA4_metawrap_30_20_bin.174	-	1520249	0.57	2009	1663	31.14	6.896	d__Bacteria;p__Firmicutes_D;c__Dethiobacteria;o__DTU022;f__UBA8154;g__SKMY01;s__	2.50022	0.233016	0.0648975	0.413208	0
DK1SA4_metawrap_30_20_bin.77	-	1502427	0.501	1791	2910	35.14	9.77	d__Bacteria;p__Firmicutes_D;c__Dethiobacteria;o__DTU022;f__UBA8154;g__SKMY01;s__	2.09515	0.31085	0.063998	0.282866	0
DKSSA4_metawrap_30_20_bin.162	-	931450	0.478	916	7714	34.65	0.847	d__Bacteria;p__Firmicutes_D;c__Dethiobacteria;o__DTU022;f__UBA8154;g__SKMY01;s__	0	0.073186	0.500292	0.134281	4.76359
DK24SA4_metawrap_30_20_bin.106	-	2368070	0.482	2595	5605	47.64	6.567	d__Bacteria;p__Firmicutes_D;c__Dethiobacteria;o__DTU022;f__UBA8154;g__SKMY01;s__	0.003742	0.051813	4.9875	1.72031	0.172287
DK15SA4_metawrap_30_20_bin.27	-	2721435	0.487	2538	16368	75.99	4.661	d__Bacteria;p__Firmicutes_D;c__Dethiobacteria;o__DTU022;f__UBA8154;g__;s__	0	0.148315	2.11562	0.57794	2.67466
DK15SA4_metawrap_30_20_bin.61	-	1683566	0.482	1699	9986	44.98	6.896	d__Bacteria;p__Firmicutes_D;c__Dethiobacteria;o__DTU022;f__UBA8154;g__;s__	0.074853	0.224025	3.26029	1.89296	0.476719
DK15SA4_metawrap_30_20_bin.59	-	787560	0.521	738	47845	32.75	0	d__Bacteria;p__Firmicutes_D;c__Dethiobacteria;o__DTU022;f__UBA8154;g__CSSED11-181;s__	0.009229	0.066357	4.62988	1.92602	0.035684
DK15SA4_metawrap_30_20_bin.58	-	842962	0.525	932	5007	34.36	0	d__Bacteria;p__Firmicutes_D;c__Dethiobacteria;o__DTU022;f__UBA8154;g__CSSED11-181;s__	0	0.025708	1.35206	0.86499	0.167294
DK15SA4_metawrap_30_20_bin.164	-	1248918	0.487	1255	15006	30.69	0.918	d__Bacteria;p__Firmicutes_D;c__Dethiobacteria;o__DTU022;f__UBA8154;g__CSSED11-181;s__	0.001709	0.010653	2.29175	0.854118	0.306954
DKSSA4_metawrap_30_20_bin.93	-	2374616	0.432	2245	19634	81.85	3.107	d__Bacteria;p__Firmicutes_D;c__Dethiobacteria;o__DTU022;f__UBA8154;g__;s__	0.002563	0.001752	0.445249	0.201987	3.30538
DKSSA4_metawrap_30_20_bin.21	-	1244924	0.432	1384	10804	46.55	0	d__Bacteria;p__Firmicutes_D;c__Dethiobacteria;o__DTU022;f__UBA8154;g__SLJK01;s__	0.010236	0.071317	0.825603	0.218499	5.12076
DKSSA4_metawrap_30_20_bin.202	-	717122	0.415	750	45531	51.72	11.2	d__Bacteria;p__Firmicutes_D;c__Dethiobacteria;o__DTU022;f__UBA8154;g__SLJK01;s__	0.004131	0.012786	0.451337	0.066954	5.3204
DK1SA4_metawrap_30_20_bin.186	-	983140	0.485	1127	3112	31.83	1.694	d__Bacteria;p__Firmicutes_D;c__Dethiobacteria;o__DTU022;f__UBA8154;g__UBA8154;s__	1.36649	0.55848	0.065338	0.219724	0
DK24SA4_metawrap_30_20_bin.38	-	1691737	0.465	2343	1777	33.64	7.556	d__Bacteria;p__Firmicutes_D;c__Dethiobacteria;o__DTU022;f__;g__;s__	0	0.051519	0.370869	1.37588	0.133073
DK15SA4_metawrap_30_20_bin.14	-	2245512	0.455	2289	17711	90.25	6.355	d__Bacteria;p__Firmicutes_D;c__Dethiobacteria;o__DTU022;f__;g__;s__	0.109557	0.37785	5.25261	0.73424	0.181704
DK15SA4_metawrap_30_20_bin.2	-	806122	0.468	962	3793	34.82	1.724	d__Bacteria;p__Firmicutes_D;c__Dethiobacteria;o__Dethiobacterales;f__Dethiobacteraceae;g__;s__	0	0	1.59848	0.180623	0
DK24SA4_metawrap_30_20_bin.87	-	979230	0.466	1208	3468	44.42	4.872	d__Bacteria;p__Firmicutes_D;c__Dethiobacteria;o__Dethiobacterales;f__;g__;s__	0	0	0.129019	2.85694	0
DK24SA4_metawrap_30_20_bin.120	-	1286574	0.572	1802	1594	49.31	7.471	d__Bacteria;p__Firmicutes_D;c__Dethiobacteria;o__PWVN01;f__PWVN01;g__PWVN01;s__	0.445338	0.116764	0.0805	5.53562	0
DKSSA4_metawrap_30_20_bin.190	-	692718	0.403	763	4915	32.63	2.019	d__Bacteria;p__Firmicutes_D;c__Dethiobacteria;o__SKNC01;f__SKNC01;g__PWHX01;s__	0	0.026139	0.070685	0.012107	2.09493
DKSSA4_metawrap_30_20_bin.129	-	1079161	0.372	1366	2304	31.3	10.5	d__Bacteria;p__Firmicutes_D;c__Dethiobacteria;o__SKNC01;f__SKNC01;g__PWHX01;s__	0	0	0.109012	0	1.85629
DKSSA4_metawrap_30_20_bin.5	-	741833	0.414	856	2693	32.99	3.605	d__Bacteria;p__Firmicutes_D;c__Natranaerobiia;o__Natranaerobiales;f__;g__;s__	0	0	0.409867	0.029404	1.53659
DK15SA4_metawrap_30_20_bin.158	-	1666665	0.355	1943	3992	35.51	0	d__Bacteria;p__Firmicutes_D;c__Natranaerobiia;o__Natranaerobiales;f__;g__;s__	0	0.044051	1.72447	0.037417	0.247246
DKSSA4_metawrap_30_20_bin.179	-	1063248	0.378	1152	5632	44.73	9.483	d__Bacteria;p__Firmicutes_D;c__Natranaerobiia;o__Natranaerobiales;f__;g__;s__	0	0	0.042113	0	2.05811
DKSSA4_metawrap_30_20_bin.192	-	1051624	0.36	1263	3481	50	13.79	d__Bacteria;p__Firmicutes_D;c__Natranaerobiia;o__Natranaerobiales;f__;g__;s__	0	0	0.025231	0	1.99292
DK15SA4_metawrap_30_20_bin.63	-	1229002	0.404	1917	1385	37.21	6.073	d__Bacteria;p__Firmicutes_D;c__Natranaerobiia;o__;f__;g__;s__	0	0.0429785	1.37434	0.133589	0.104098
DK24SA4_metawrap_30_20_bin.45	-	640710	0.535	946	1696	34.34	5.748	d__Bacteria;p__Firmicutes_D;c__Proteinivoracia;o__UBA4975;f__UBA4975;g__PWLI01;s__	3.85658	0.547369	1.32795	16.9114	0
DK3SA4_metawrap_30_20_bin.19	-	1099827	0.536	1286	5667	69.54	4.505	d__Bacteria;p__Firmicutes_D;c__Proteinivoracia;o__UBA4975;f__UBA4975;g__PWLI01;s__	19.4161	2.01673	0.62692	9.97161	0
DK15SA4_metawrap_30_20_bin.28	-	1180418	0.536	1648	1992	48.88	9.463	d__Bacteria;p__Firmicutes_D;c__Proteinivoracia;o__UBA4975;f__UBA4975;g__PWLI01;s__	1.64643	0.327522	1.64281	11.0636	0
DK1SA4_metawrap_30_20_bin.43	-	872272	0.518	1063	1954	32.36	4.231	d__Bacteria;p__Firmicutes_D;c__Proteinivoracia;o__UBA4975;f__UBA4975;g__PWLI01;s__	15.2666	1.777	0.185417	1.0802	0
DK24SA4_metawrap_30_20_bin.124	-	1954923	0.523	2031	16813	84.32	3.954	d__Bacteria;p__Firmicutes_D;c__UBA994;o__UBA994;f__UBA994;g__UBA2296;s__	0.007175	0.04313	0.003466	10.9418	0
DK24SA4_metawrap_30_20_bin.48	-	3880774	0.499	5173	1978	34.14	10.86	d__Bacteria;p__Firmicutes_D;c__UBA994;o__;f__;g__;s__	0.077474	0.053241	0.027491	2.5922	0
DK24SA4_metawrap_30_20_bin.24	-	2815025	0.447	2837	12037	84.88	1.694	d__Bacteria;p__Firmicutes_D;c__UBA994;o__PWPR01;f__;g__;s__	0.019426	0	0	3.996	0
DK24SA4_metawrap_30_20_bin.91	-	1915837	0.421	2255	3763	46.86	0.862	d__Bacteria;p__Firmicutes_A;c__Clostridia;o__Peptostreptococcales;f__T1SED10-28;g__T1SED10-28;s__	0.400382	0.334454	0.071951	2.35454	0
DKSSA4_metawrap_30_20_bin.36	-	2772624	0.444	2742	22702	94.88	0	d__Bacteria;p__Firmicutes_A;c__Clostridia;o__Peptostreptococcales;f__T1SED10-28;g__T1SED10-28;s__	0.264881	0.323189	0.485589	0.010625	2.83099
DK3SA4_metawrap_30_20_bin.187	-	1088844	0.485	1488	1518	30.64	5.172	d__Bacteria;p__Firmicutes_A;c__Clostridia;o__Peptostreptococcales;f__Tindalliaceae;g__Tindallia;s__	0.172184	1.45373	0.035064	0	0
DK24SA4_metawrap_30_20_bin.74	-	1931227	0.422	2104	4320	30.66	9.482	d__Bacteria;p__Firmicutes_F;c__Halanaerobiia;o__Halanaerobiales;f__Halarsenatibacteraceae;g__T1SED10-84;s__	0.014047	0.235442	6.82505	1.37803	1.05831
DKSSA4_metawrap_30_20_bin.183	-	1493726	0.457	1474	8910	57.21	8.62	d__Bacteria;p__Firmicutes_F;c__Halanaerobiia;o__Halanaerobiales;f__Halarsenatibacteraceae;g__T1SED10-84;s__	0	0.171646	2.09337	0.158814	5.1073
DK3SA4_metawrap_30_20_bin.106	-	1321332	0.436	1455	3686	43.1	10.63	d__Bacteria;p__Firmicutes_F;c__Halanaerobiia;o__Halanaerobiales;f__Halarsenatibacteraceae;g__T1SED10-84;s__	0.028171	0.793155	3.30019	0.536378	0.702615
DK24SA4_metawrap_30_20_bin.79	-	1578540	0.462	1599	6806	45.34	17.24	d__Bacteria;p__Firmicutes_F;c__Halanaerobiia;o__Halanaerobiales;f__Halarsenatibacteraceae;g__T1SED10-84;s__	0.022447	0.2638	6.91853	1.45991	0.804958
DK24SA4_metawrap_30_20_bin.25	-	834859	0.492	865	4357	30.25	14.13	d__Bacteria;p__Firmicutes_F;c__Halanaerobiia;o__Halanaerobiales;f__Halarsenatibacteraceae;g__T1SED10-84;s__	0.016214	0.224385	4.70845	1.23005	1.28024
DK3SA4_metawrap_30_20_bin.115	-	1320309	0.479	1387	3921	36.37	13.79	d__Bacteria;p__Firmicutes_F;c__Halanaerobiia;o__Halanaerobiales;f__Halarsenatibacteraceae;g__T1SED10-84;s__	0.053282	0.855146	2.41051	0.527496	0.525256
DK3SA4_metawrap_30_20_bin.60	-	782222	0.484	931	1649	33.8	6.638	d__Bacteria;p__Firmicutes_F;c__Halanaerobiia;o__Halanaerobiales;f__Halarsenatibacteraceae;g__T1SED10-84;s__	0	0.881368	1.40196	0.209427	0.458
DK15SA4_metawrap_30_20_bin.9	-	1279181	0.456	1268	10530	63.8	1.754	d__Bacteria;p__Firmicutes_F;c__Halanaerobiia;o__Halanaerobiales;f__Halarsenatibacteraceae;g__T1SED10-84;s__	0.130899	0.398356	3.1725	0.686044	0.588676
DKSSA4_metawrap_30_20_bin.187	-	841657	0.481	1075	1603	31.26	5.172	d__Bacteria;p__Firmicutes_F;c__Halanaerobiia;o__Halanaerobiales;f__Halarsenatibacteraceae;g__T1SED10-84;s__	0	0.045015	0.58075	0.0372865	1.51935
DK15SA4_metawrap_30_20_bin.78	-	2756318	0.453	3681	1507	36.64	5.517	d__Bacteria;p__Firmicutes_F;c__Halanaerobiia;o__Halanaerobiales;f__Halarsenatibacteraceae;g__T1SED10-84;s__	0	0.228448	2.49854	0.35264	1.13942
DKSSA4_metawrap_30_20_bin.109	-	951100	0.48	1182	1770	32.07	3.508	d__Bacteria;p__Firmicutes_F;c__Halanaerobiia;o__Halanaerobiales;f__Halarsenatibacteraceae;g__Halarsenatibacter;s__	0	0	0	0	1.81104
DKSSA4_metawrap_30_20_bin.110	-	840709	0.465	881	4930	38.75	2.412	d__Bacteria;p__Firmicutes_F;c__Halanaerobiia;o__Halanaerobiales;f__Halarsenatibacteraceae;g__Halarsenatibacter;s__	0	0	0.00965	0	2.04082
DKSSA4_metawrap_30_20_bin.184	-	1723753	0.431	1953	3741	42.08	18.46	d__Bacteria;p__Firmicutes_F;c__Halanaerobiia;o__Halanaerobiales;f__Halarsenatibacteraceae;g__Halarsenatibacter;s__	0	0	0.073427	0	2.02963
DK15SA4_metawrap_30_20_bin.13	-	2849350	0.498	3132	9771	95.49	2.326	d__Bacteria;p__Firmicutes_F;c__Halanaerobiia;o__Halanaerobiales;f__Halarsenatibacteraceae;g__Halarsenatibacter;s__	0	0.020794	2.19645	0.111054	11.3714
DKSSA4_metawrap_30_20_bin.35	-	704286	0.402	778	3618	42.25	3.362	d__Bacteria;p__Firmicutes_F;c__Halanaerobiia;o__Halanaerobiales;f__Halarsenatibacteraceae;g__Halarsenatibacter;s__	0	0	0.055247	0	1.99579
DKSSA4_metawrap_30_20_bin.1	-	1504033	0.397	1540	9440	46.55	6.896	d__Bacteria;p__Firmicutes_F;c__Halanaerobiia;o__Halanaerobiales;f__Halarsenatibacteraceae;g__Halarsenatibacter;s__	0	0	0.151266	0.002607	2.43233
DKSSA4_metawrap_30_20_bin.6	-	1783260	0.424	1687	19333	49.12	4.824	d__Bacteria;p__Firmicutes_F;c__Halanaerobiia;o__Halanaerobiales;f__Halarsenatibacteraceae;g__Halarsenatibacter;s__	0	0.004339	0.15674	0.00615	3.20672
DKSSA4_metawrap_30_20_bin.185	-	2343331	0.36	2567	5843	66.77	10.34	d__Bacteria;p__Firmicutes_F;c__Halanaerobiia;o__Halanaerobiales;f__Halarsenatibacteraceae;g__SLSL01;s__	0.037846	0.351091	0.439345	0.018553	4.78535
DKSSA4_metawrap_30_20_bin.102	-	1045830	0.34	1152	4885	36.36	0	d__Bacteria;p__Firmicutes_F;c__Halanaerobiia;o__Halanaerobiales;f__Halarsenatibacteraceae;g__SLSL01;s__	0.095095	0.557926	0.301152	0	2.81816
DKSSA4_metawrap_30_20_bin.146	-	2773481	0.359	4125	1301	35.37	13.48	d__Bacteria;p__Firmicutes_F;c__Halanaerobiia;o__Halanaerobiales;f__Halarsenatibacteraceae;g__;s__	0	0.224869	0.440667	0	2.66745
DK15SA4_metawrap_30_20_bin.6	-	1998634	0.356	2286	3024	55.2	0	d__Bacteria;p__Firmicutes_F;c__Halanaerobiia;o__Halanaerobiales;f__CSSED10-376;g__;s__	0	0.43818	1.9325	0	0.165288
DKSSA4_metawrap_30_20_bin.171	-	2383381	0.486	2361	15002	91.8	2.824	d__Bacteria;p__Firmicutes_F;c__Halanaerobiia;o__B1SED10-174;f__B1SED10-174;g__T1SED10-26;s__	0	0.014111	0.088962	0.005276	2.68669
DK15SA4_metawrap_30_20_bin.18	-	3338680	0.354	5034	1276	32.91	3.918	d__Bacteria;p__Firmicutes_F;c__;o__;f__;g__;s__	0	0.0835925	1.30115	0	0.243451
DK24SA4_metawrap_30_20_bin.75	-	1861104	0.611	2242	2850	35.34	5.172	d__Bacteria;p__Firmicutes_E;c__SLMV01;o__SLMV01;f__SLMV01;g__PWUC01;s__	0.026815	0.03571	0.080376	2.13915	0
DK1SA4_metawrap_30_20_bin.118	-	1120717	0.621	1362	2930	34.65	0	d__Bacteria;p__Firmicutes_E;c__SLMV01;o__SLMV01;f__SLMV01;g__PWUB01;s__	1.56251	0.078529	0.097864	0.763476	0
DK1SA4_metawrap_30_20_bin.60	-	2930252	0.61	2895	18735	93.06	1.519	d__Bacteria;p__Firmicutes_E;c__SLMV01;o__SLMV01;f__SLMV01;g__PWUB01;s__	1.96877	1.00994	0.073031	0.115559	0
DK15SA4_metawrap_30_20_bin.146	-	2421946	0.641	2722	6129	75.3	2.475	d__Bacteria;p__Firmicutes_E;c__SLMV01;o__SLMV01;f__SLMV01;g__;s__	0	0.239003	2.95311	0.041566	0.046601
DK15SA4_metawrap_30_20_bin.131	-	2052162	0.562	2091	10566	68.34	2.941	d__Bacteria;p__Firmicutes_E;c__SLMV01;o__SLMV01;f__SLMV01;g__PUMD01;s__	0.002197	0.22644	24.9231	0.016222	0.221263
DK15SA4_metawrap_30_20_bin.12	-	5696892	0.567	7932	1597	37.97	7.88	d__Bacteria;p__Firmicutes_E;c__SLMV01;o__;f__;g__;s__	0	0.151469	1.50002	0.206819	0
DK3SA4_metawrap_30_20_bin.165	-	2279661	0.618	2393	10845	92.07	0.495	d__Bacteria;p__Firmicutes_E;c__SLMV01;o__;f__;g__;s__	0.425997	1.01518	0.625796	0.510807	0
DK1SA4_metawrap_30_20_bin.124	-	2370829	0.589	2348	33950	91.08	2.25	d__Bacteria;p__Firmicutes_E;c__SLMV01;o__;f__;g__;s__	3.44164	0.041069	0.040799	0.775702	0
DK24SA4_metawrap_30_20_bin.65	-	1316712	0.611	1729	2609	50.78	0	d__Bacteria;p__Firmicutes_E;c__DTU015;o__;f__;g__;s__	0.433952	0.036645	0	2.22951	0
DK3SA4_metawrap_30_20_bin.87	-	3247112	0.723	3201	11575	90.33	1.282	d__Bacteria;p__Actinobacteriota;c__Actinomycetia;o__Nitriliruptorales;f__Nitriliruptoraceae;g__T1Sed10-7;s__	1.32682	14.8141	0	0	0.310993
DK1SA4_metawrap_30_20_bin.25	-	3198684	0.723	3403	6446	92.04	3.276	d__Bacteria;p__Actinobacteriota;c__Actinomycetia;o__Nitriliruptorales;f__Nitriliruptoraceae;g__T1Sed10-7;s__	6.53325	19.3271	0	0	0.040978
DK3SA4_metawrap_30_20_bin.29	-	2913476	0.724	3332	3653	54.76	0	d__Bacteria;p__Actinobacteriota;c__Actinomycetia;o__Nitriliruptorales;f__Nitriliruptoraceae;g__T1Sed10-7;s__	0.68804	2.974	0	0	0.698387
DKSSA4_metawrap_30_20_bin.19	-	4113206	0.711	4863	3067	92.41	3.988	d__Bacteria;p__Actinobacteriota;c__Actinomycetia;o__Nitriliruptorales;f__Nitriliruptoraceae;g__T1Sed10-7;s__	0.098448	0.754029	0	0	12.3782
DKSSA4_metawrap_30_20_bin.41	-	2017202	0.715	2910	1305	30.46	1.282	d__Bacteria;p__Actinobacteriota;c__Actinomycetia;o__Nitriliruptorales;f__Nitriliruptoraceae;g__T1Sed10-7;s__	0.147969	0.594645	0	0	1.67523
DK3SA4_metawrap_30_20_bin.160	-	1608160	0.726	2012	1988	43.81	8.62	d__Bacteria;p__Actinobacteriota;c__Actinomycetia;o__Nitriliruptorales;f__Nitriliruptoraceae;g__;s__	0.510819	1.67001	0	0	0.057283
DK1SA4_metawrap_30_20_bin.46	-	3843244	0.708	3950	11541	92.73	3.418	d__Bacteria;p__Actinobacteriota;c__Actinomycetia;o__Nitriliruptorales;f__Nitriliruptoraceae;g__CSSed11-175R1;s__	3.81225	0.957561	0	0	0.150559
DKSSA4_metawrap_30_20_bin.101	-	4979299	0.694	5775	3288	72.09	2.564	d__Bacteria;p__Actinobacteriota;c__Actinomycetia;o__Nitriliruptorales;f__Nitriliruptoraceae;g__CSSed11-175R1;s__	0.132275	0.479867	0	0	2.11738
DK3SA4_metawrap_30_20_bin.24	-	987103	0.738	1172	2798	33.62	8.62	d__Bacteria;p__Actinobacteriota;c__Actinomycetia;o__Nitriliruptorales;f__Nitriliruptoraceae;g__;s__	0.36234	1.6615	0	0	0.029796
DK3SA4_metawrap_30_20_bin.121	-	2505217	0.738	2547	7058	70.57	3.448	d__Bacteria;p__Actinobacteriota;c__Actinomycetia;o__Nitriliruptorales;f__Nitriliruptoraceae;g__SLMP01;s__	1.28428	2.22535	0	0	0.01671
DK1SA4_metawrap_30_20_bin.134	-	1718846	0.737	1727	6676	65.51	0	d__Bacteria;p__Actinobacteriota;c__Actinomycetia;o__Nitriliruptorales;f__Nitriliruptoraceae;g__SLMP01;s__	1.82738	1.48176	0	0	0.014685
DK1SA4_metawrap_30_20_bin.36	-	2162876	0.716	2701	2212	34.48	2.586	d__Bacteria;p__Actinobacteriota;c__Actinomycetia;o__Nitriliruptorales;f__Nitriliruptoraceae;g__;s__	1.81297	0.642275	0	0	0.09276
DK1SA4_metawrap_30_20_bin.106	-	1610917	0.727	1981	2052	39	5.128	d__Bacteria;p__Actinobacteriota;c__Actinomycetia;o__Nitriliruptorales;f__Nitriliruptoraceae;g__;s__	1.48707	1.09432	0	0	0.09322
DK1SA4_metawrap_30_20_bin.99	-	2513255	0.709	3816	1241	31.9	6.345	d__Bacteria;p__Actinobacteriota;c__Actinomycetia;o__Nitriliruptorales;f__;g__;s__	1.66527	0.768625	0	0	0
DK3SA4_metawrap_30_20_bin.147	-	1867745	0.691	2320	2471	40.86	0.862	d__Bacteria;p__Actinobacteriota;c__Acidimicrobiia;o__Acidimicrobiales;f__Ilumatobacteraceae;g__SKSP01;s__	0.05013	1.82814	0	0	0
DK3SA4_metawrap_30_20_bin.88	-	3202132	0.693	3378	7270	76.8	2.564	d__Bacteria;p__Actinobacteriota;c__Acidimicrobiia;o__Acidimicrobiales;f__Ilumatobacteraceae;g__SKSP01;s__	0.201504	6.40255	0	0	0.007222
DK24SA4_metawrap_30_20_bin.28	-	492595	0.604	599	3540	31.66	0	d__Bacteria;p__Actinobacteriota;c__Coriobacteriia;o__OPB41;f__SLCP01;g__PWVH01;s__	0.17038	0.094131	0.173493	2.15514	0
DK24SA4_metawrap_30_20_bin.71	-	1441031	0.441	1675	4354	60.59	1.363	d__Bacteria;p__Actinobacteriota;c__UBA1414;o__UBA1414;f__UBA1414;g__SKNS01;s__	0.116238	0.212785	0.459191	3.4214	0.012611
DK24SA4_metawrap_30_20_bin.67	-	1228761	0.436	1846	1399	37.6	9.256	d__Bacteria;p__Actinobacteriota;c__UBA1414;o__UBA1414;f__UBA1414;g__SKNS01;s__	0.184222	0.124365	0.450793	2.13189	0
DK3SA4_metawrap_30_20_bin.74	-	2650634	0.714	3317	2826	35.57	7.366	d__Bacteria;p__Deinococcota;c__Deinococci;o__Deinococcales;f__Trueperaceae;g__CSSed10-48;s__	0.765637	2.31732	0	0	0.030094
DK3SA4_metawrap_30_20_bin.80	-	1325765	0.711	1494	4341	30.01	4.623	d__Bacteria;p__Deinococcota;c__Deinococci;o__Deinococcales;f__Trueperaceae;g__CSSed10-48;s__	0.891255	2.48051	0	0	0.022268
DK3SA4_metawrap_30_20_bin.70	-	3164865	0.711	3262	6722	80.17	1.906	d__Bacteria;p__Deinococcota;c__Deinococci;o__Deinococcales;f__Trueperaceae;g__CSSed10-48;s__	13.9512	14.9636	0	0	0.008701
DK1SA4_metawrap_30_20_bin.87	-	3546384	0.705	3528	11792	64.97	3.389	d__Bacteria;p__Deinococcota;c__Deinococci;o__Deinococcales;f__Trueperaceae;g__CSSed10-48;s__	5.50426	2.9012	0	0	0
DK1SA4_metawrap_30_20_bin.8	-	3382013	0.698	3573	6524	36.83	5.172	d__Bacteria;p__Deinococcota;c__Deinococci;o__Deinococcales;f__Trueperaceae;g__CSSed10-48;s__	1.63866	1.15189	0	0	0
DK3SA4_metawrap_30_20_bin.30	-	3170864	0.713	3118	15368	79.09	2.33	d__Bacteria;p__Deinococcota;c__Deinococci;o__Deinococcales;f__Trueperaceae;g__CSSed10-48;s__	1.13744	3.51748	0	0	0
DK1SA4_metawrap_30_20_bin.153	-	3172666	0.72	3155	22513	83.47	2.895	d__Bacteria;p__Deinococcota;c__Deinococci;o__Deinococcales;f__Trueperaceae;g__CSSed10-48;s__	6.65728	1.11763	0	0	0.0050545
DK3SA4_metawrap_30_20_bin.59	-	1854575	0.706	3050	1222	30.43	9.463	d__Bacteria;p__Deinococcota;c__Deinococci;o__Deinococcales;f__Trueperaceae;g__;s__	0.680619	1.58449	0	0	0
DK3SA4_metawrap_30_20_bin.138	-	2398319	0.717	3025	1940	37.93	11.83	d__Bacteria;p__Deinococcota;c__Deinococci;o__Deinococcales;f__Trueperaceae;g__SKWV01;s__	0.783362	1.62753	0	0	0
DK3SA4_metawrap_30_20_bin.146	-	2258804	0.707	3164	1911	32.72	6.41	d__Bacteria;p__Deinococcota;c__Deinococci;o__Deinococcales;f__Trueperaceae;g__SKWV01;s__	0.776726	1.6361	0	0	0
DK3SA4_metawrap_30_20_bin.159	-	3067602	0.729	2985	16880	86.15	1.836	d__Bacteria;p__Deinococcota;c__Deinococci;o__Deinococcales;f__Trueperaceae;g__;s__	0.65129	3.72147	0	0	0.003794
DK1SA4_metawrap_30_20_bin.94	-	2284978	0.729	2298	10314	72.14	2.118	d__Bacteria;p__Deinococcota;c__Deinococci;o__Deinococcales;f__Trueperaceae;g__;s__	10.2567	1.06043	0	0	0
DK1SA4_metawrap_30_20_bin.10	-	2394460	0.679	3660	1223	30.81	4.848	d__Bacteria;p__Deinococcota;c__;o__;f__;g__;s__	1.67706	0.188413	0	0	0
DK24SA4_metawrap_30_20_bin.14	-	1299208	0.453	1194	17784	32.42	0.909	d__Bacteria;p__Chloroflexota;c__Anaerolineae;o__Anaerolineales;f__Anaerolineaceae;g__Brevefilum;s__	0.255028	0.069563	0.107003	10.1751	0
DK24SA4_metawrap_30_20_bin.111	-	1961302	0.46	2723	1442	32.41	0.626	d__Bacteria;p__Chloroflexota;c__Anaerolineae;o__Anaerolineales;f__Anaerolineaceae;g__Brevefilum;s__	0.201237	0.063147	0	2.19524	0
DK24SA4_metawrap_30_20_bin.138	-	1317881	0.499	1269	10940	44.59	9.561	d__Bacteria;p__Chloroflexota;c__Anaerolineae;o__Anaerolineales;f__Anaerolineaceae;g__Brevefilum;s__	0.306813	0.100203	0.167841	14.7959	0
DK24SA4_metawrap_30_20_bin.7	-	3112334	0.456	3237	4152	48.27	6.896	d__Bacteria;p__Chloroflexota;c__Anaerolineae;o__Anaerolineales;f__Anaerolineaceae;g__Brevefilum;s__	0.221441	0.048212	0.01614	2.53864	0
DK24SA4_metawrap_30_20_bin.33	-	1255642	0.529	1672	1707	49.04	16.31	d__Bacteria;p__Chloroflexota;c__Anaerolineae;o__Anaerolineales;f__Anaerolineaceae;g__Brevefilum;s__	1.05831	0.42417	0.543033	14.019	0
DK1SA4_metawrap_30_20_bin.96	-	1970762	0.449	1893	9877	56.83	5.818	d__Bacteria;p__Chloroflexota;c__Anaerolineae;o__Anaerolineales;f__Anaerolineaceae;g__Brevefilum;s__	2.38724	1.88024	0.216744	0.02666	0
DK1SA4_metawrap_30_20_bin.162	-	1979206	0.484	1915	8626	66.53	2.909	d__Bacteria;p__Chloroflexota;c__Anaerolineae;o__Anaerolineales;f__Anaerolineaceae;g__Brevefilum;s__	15.4558	2.21181	0.111613	0.089552	0
DK1SA4_metawrap_30_20_bin.180	-	2057776	0.491	1925	16883	62.54	1.818	d__Bacteria;p__Chloroflexota;c__Anaerolineae;o__Anaerolineales;f__Anaerolineaceae;g__Brevefilum;s__	5.50979	0.276582	0.174016	21.1412	0
DK24SA4_metawrap_30_20_bin.92	-	1085952	0.451	1054	8736	37.62	10.9	d__Bacteria;p__Chloroflexota;c__Anaerolineae;o__Anaerolineales;f__Anaerolineaceae;g__Brevefilum;s__	0.274514	0.283992	0.537513	17.1429	0
DK15SA4_metawrap_30_20_bin.69	-	1201832	0.503	1672	1435	32.68	3.727	d__Bacteria;p__Chloroflexota;c__Anaerolineae;o__Anaerolineales;f__Anaerolineaceae;g__Brevefilum;s__	0.146695	0.36242	0.681694	0.085405	0
DK1SA4_metawrap_30_20_bin.165	-	945030	0.456	897	15362	30.72	0	d__Bacteria;p__Chloroflexota;c__Anaerolineae;o__Anaerolineales;f__Anaerolineaceae;g__Brevefilum;s__	3.77273	1.73885	0.028311	0.01039	0
DK3SA4_metawrap_30_20_bin.186	-	1376018	0.484	1239	26351	41.51	1.09	d__Bacteria;p__Chloroflexota;c__Anaerolineae;o__Anaerolineales;f__Anaerolineaceae;g__Brevefilum;s__	0.637516	2.9087	0.546824	0.058872	0.003379
DK1SA4_metawrap_30_20_bin.113	-	867614	0.519	849	7818	35	1.818	d__Bacteria;p__Chloroflexota;c__Anaerolineae;o__Anaerolineales;f__Anaerolineaceae;g__Brevefilum;s__	3.76654	1.95784	0.025138	0	0
DK15SA4_metawrap_30_20_bin.16	-	1505650	0.621	1561	5852	35.6	0	d__Bacteria;p__Chloroflexota;c__Anaerolineae;o__B4-G1;f__B4-G1;g__SKLM01;s__	0.253696	0.189599	2.0951	0.473434	0.008772
DK24SA4_metawrap_30_20_bin.52	-	3004442	0.625	3185	6076	60.25	8.363	d__Bacteria;p__Chloroflexota;c__Anaerolineae;o__B4-G1;f__B4-G1;g__SKLM01;s__	0.198103	0.241834	1.71102	1.42801	0
DK3SA4_metawrap_30_20_bin.112	-	2038557	0.633	2681	1741	36.89	0.909	d__Bacteria;p__Chloroflexota;c__Anaerolineae;o__B4-G1;f__B4-G1;g__SKLM01;s__	0.170047	0.811839	0.65183	0.254175	0
DK1SA4_metawrap_30_20_bin.147	-	2529834	0.63	2880	2907	51.18	3.636	d__Bacteria;p__Chloroflexota;c__Anaerolineae;o__B4-G1;f__B4-G1;g__SKLM01;s__	0.816558	0.205413	1.05471	0.350652	0
DK3SA4_metawrap_30_20_bin.103	-	3942306	0.623	3679	23524	91.81	3.181	d__Bacteria;p__Chloroflexota;c__Anaerolineae;o__B4-G1;f__B4-G1;g__SKLM01;s__	0.217462	1.23528	1.79084	1.74415	0.0103
DK24SA4_metawrap_30_20_bin.97	-	2205573	0.637	3058	1370	37.63	7.758	d__Bacteria;p__Chloroflexota;c__Anaerolineae;o__B4-G1;f__B4-G1;g__SKLM01;s__	0.182818	0.119545	0.070393	1.65383	0
DK15SA4_metawrap_30_20_bin.79	-	2556149	0.614	2427	14870	63.48	4.09	d__Bacteria;p__Chloroflexota;c__Anaerolineae;o__B4-G1;f__B4-G1;g__SKLM01;s__	0.271234	0.035066	3.12272	0.124983	0.013817
DK1SA4_metawrap_30_20_bin.189	-	1628559	0.637	2220	1396	33.42	6.672	d__Bacteria;p__Chloroflexota;c__Anaerolineae;o__UBA1429;f__UBA1429;g__SKLG01;s__	2.02037	0.616065	0	0.822319	0
[truncated: 221 more rows]

## Sheet: Table S5
Table S5 Summary of Ca. Natranaeroarchaeales MAGs downloaded from GTDB
[truncated: 13 more rows]

## Sheet: Table S6
Table S6 Blast result of 16S rRNA gene sequences extacted from 16S amplicon and metagenome-assembled genomes
[truncated: 4 more rows]

[truncated: 3 more sheets: Table S7, Table S8 , Table S9]
